# Supplementary material for: THC exposure of human iPSC neurons impacts genes associated with neuropsychiatric disorders
Source: PubMed Central journal article supplement (PMC5915454; doi:10.1038/s41398-018-0137-3), 2018-04-25
Supplement: 41398_2018_137_MOESM2_ESM.pdf [file 41398_2018_137_MOESM2_ESM.pdf]

**Supplementary Table 1: Patient samples used in RNA sequencing or quantitative RT-PCR.**

| <b>Experiment</b> | <b>Individual</b> | <b>hiPSC / NPC line ID</b>                   |
|-------------------|-------------------|----------------------------------------------|
| RNAseq            | Ca                | BJ hiPSC#2 NPC#A                             |
| RNAseq            | Cb                | GM03440 hiPSC#5 NPC#A                        |
| RNAseq            | Cc                | GM03651 hiPSC#A NPC#A                        |
| RNAseq            | Cd                | AG09319 hiPSC#2 NPC#A                        |
| RNAseq            | Ce                | AG09429 hiPSC#3 NPC#A                        |
|                   |                   |                                              |
| qRT-PCR           | Ca                | BJ hiPSC#2 NPC#A                             |
| qRT-PCR           | Cb                | GM03440 hiPSC#5 NPC#A                        |
| qRT-PCR           | Cc                | GM03651 hiPSC#A NPC#A                        |
| qRT-PCR           | Cd                | GM04506 hiPSC#B NPC#A                        |
| qRT-PCR           | Ce                | AG09319 hiPSC#2 NPC#A                        |
|                   |                   |                                              |
| qRT-PCR           | S1                | GM01792 hiPSC#1 NPC#A, GM01792 hiPSC#1 NPC#E |
| qRT-PCR           | S2                | GM02038 hiPSC#1 NPC#A, GM02038 hiPSC#1 NPC#B |
| qRT-PCR           | S3                | GM01835 hiPSC#1 NPC#5                        |
| qRT-PCR           | S4                | GM02497 hiPSC#1 NPC#C                        |

(In the individual column, ‘C’ denotes control while ‘S’ denotes schizophrenia)
