# Supplementary material for: THC exposure of human iPSC neurons impacts genes associated with neuropsychiatric disorders
Source: PubMed Central journal article supplement (PMC5915454; doi:10.1038/s41398-018-0137-3), 2018-04-25
Supplement: 41398_2018_137_MOESM3_ESM.pdf [file 41398_2018_137_MOESM3_ESM.pdf]

**Supplementary Table 2: Quantitative PCR primers**

| Gene   | Forward primer (5'-3') | Reverse primer (5'-3')  | Accession #    |
|--------|------------------------|-------------------------|----------------|
| COX7A2 | CCCCAAAGAAGAGCTCGGTT   | AGAAGCAGGAGTGACTTCAGTC  | NM_001865.3    |
| MT-CO1 | GGAGGAGGAGACCCCATCT    | TATGGGAGATTATCCGAAGCCTG | MF441747.1     |
| MT-CO3 | CAGCCCATGACCCCTAACAG   | AGGCCTAGTATGAGGAGCGT    | NC_012920.1    |
| GRID2  | AACAAGAGGAAAGGCTCCCG   | TCGTCATCTGTGCACAAGCT    | NM_001510.3    |
| HOMER1 | TAACGAAGGCAGCTGAGTCC   | AGACCAGCCTGTCAATGACG    | NM_004272.4    |
| NR4A1  | GGTGACCCACGATTTGTCT    | GGCTTATTACAGCACGGCG     | NM_002135.4    |
| hFOSB  | CACTCCCGAAAGCCTTTCCT   | CCCTTCTCGGTTCTGTCACC    | NM_001114171.1 |
