# Supplementary material for: THC exposure of human iPSC neurons impacts genes associated with neuropsychiatric disorders
Source: PubMed Central journal article supplement (PMC5915454; doi:10.1038/s41398-018-0137-3), 2018-04-25
Supplement: 41398_2018_137_MOESM4_ESM.pdf [file 41398_2018_137_MOESM4_ESM.pdf]

Supplementary Table 3: Significant gene expression changes in response to THC treatments

Significantly altered genes between control and THC (acute) treated iPSC-derived neurons.

| Ensembl gene ID  | logFC       | logCPM       | PValue     | FDR        | hgnc_symbol   | chromosome | start_position | end_position | strand |
|------------------|-------------|--------------|------------|------------|---------------|------------|----------------|--------------|--------|
| ENSG00000160179  | -2.04564374 | 5.997429796  | 4.00E-05   | 0.002656   | ABCG1         | 21         | 42199689       | 42297244     | 1      |
| ENSG00000146109  | -1.29907356 | 4.517272084  | 0.00014994 | 0.00673224 | ABT1          | 6          | 26596952       | 26600744     | 1      |
| ENSG0000014257   | -9.43564432 | -1.54540333  | 2.46E-05   | 0.0019672  | ACPP          | 3          | 132317367      | 132368298    | 1      |
| ENSG00000129467  | -7.3830549  | -1.571050763 | 3.24E-05   | 0.00233695 | ADCY4         | 14         | 24318349       | 24335093     | -1     |
| ENSG00000116863  | -1.33570742 | 5.252789003  | 0.00010503 | 0.00529669 | ADPRHL2       | 1          | 36088875       | 36093932     | 1      |
| ENSG00000181026  | -2.00750461 | 6.132771524  | 0.00011648 | 0.00570547 | AEN           | 15         | 88621296       | 88632282     | 1      |
| ENSG00000187546  | -8.72253033 | -0.781421738 | 0.00010983 | 0.00545072 | AGMO          | 7          | 15200318       | 15562015     | -1     |
| ENSG000001092847 | 1.212345024 | 6.834515835  | 0.0002674  | 0.00999396 | AGO1          | 1          | 35869808       | 35930528     | 1      |
| ENSG00000169692  | -2.0167907  | 2.625411825  | 3.92E-05   | 0.00264455 | AGPAT2        | 9          | 136673143      | 136687423    | -1     |
| ENSG00000126705  | 2.377874775 | 3.452013963  | 0.00019524 | 0.00795576 | AHDC1         | 1          | 27534035       | 27604431     | -1     |
| ENSG00000059573  | -1.2741398  | 6.708504603  | 0.0001531  | 0.00683759 | ALDH18A1      | 10         | 95605929       | 95656706     | -1     |
| ENSG00000184254  | -9.33511111 | 0.707051955  | 9.21E-06   | 0.00099012 | ALDH1A3       | 15         | 100877714      | 100916626    | 1      |
| ENSG00000091542  | -0.96135455 | 6.762190485  | 0.0001989  | 0.00807612 | ALKBH5        | 17         | 18183078       | 18209954     | 1      |
| ENSG00000123505  | -1.52205232 | 7.522791073  | 5.68E-05   | 0.00340453 | AMD1          | 6          | 110814621      | 110895713    | 1      |
| ENSG00000104899  | 2.108769934 | 1.28558715   | 0.00024624 | 0.00943333 | AMH           | 19         | 2249309        | 2252073      | 1      |
| ENSG00000169604  | 2.172723956 | 6.248975281  | 0.00010517 | 0.00529669 | ANTXR1        | 2          | 69013178       | 69249327     | 1      |
| ENSG00000264230  | -5.22801928 | -0.866766224 | 6.25E-06   | 0.00073461 | ANXA8L1       | 10         | 46375627       | 46537864     | 1      |
| ENSG00000134982  | 1.492284138 | 9.264868086  | 3.99E-05   | 0.002656   | APC           | 5          | 112707498      | 112846239    | 1      |
| ENSG00000244509  | 1.953321838 | 2.784880164  | 0.00016865 | 0.00721021 | APOBEC3C      | 22         | 39014083       | 39020352     | 1      |
| ENSG00000169083  | 1.378261946 | 4.784891511  | 5.44E-05   | 0.00331826 | AR            | X          | 67544032       | 67730619     | 1      |
| ENSG00000109321  | -9.21131185 | -1.655630195 | 5.22E-05   | 0.00324328 | AREG          | 4          | 74445134       | 74455009     | 1      |
| ENSG00000168374  | -1.62939031 | 7.748531487  | 1.04E-05   | 0.00106708 | ARF4          | 3          | 57571363       | 57598220     | -1     |
| ENSG00000187951  | 2.289647306 | 0.925473827  | 0.00011841 | 0.005775   | ARHGAP11B     | 15         | 30624494       | 30772993     | 1      |
| ENSG00000180801  | -1.97591999 | 5.092245047  | 0.00018919 | 0.00779372 | ARSJ          | 4          | 113900284      | 113979727    | -1     |
| ENSG00000153317  | 1.533228116 | 4.890277877  | 0.00022375 | 0.00877031 | ASAP1         | 8          | 130052104      | 130443660    | -1     |
| ENSG00000162772  | -2.68995189 | 4.100110753  | 0.00015243 | 0.00682609 | ATF3          | 1          | 212565334      | 212620777    | 1      |
| ENSG00000128272  | -1.20983088 | 8.583576392  | 0.00022618 | 0.00885558 | ATF4          | 22         | 39519695       | 39522685     | 1      |
| ENSG00000170653  | 2.011416681 | 3.284127878  | 8.51E-05   | 0.0045862  | ATF7          | 12         | 53507856       | 53626410     | -1     |
| ENSG00000171681  | 1.936147914 | 7.824670977  | 5.38E-05   | 0.0032959  | ATF7IP        | 12         | 14365632       | 14502935     | 1      |
| ENSG00000123395  | -1.45938162 | 5.134100158  | 3.76E-05   | 0.0025859  | ATG101        | 12         | 52069246       | 52077494     | 1      |
| ENSG00000117410  | -1.54387162 | 6.234005492  | 1.52E-05   | 0.00136165 | ATP6V0B       | 1          | 43974487       | 43978295     | 1      |
| ENSG00000183778  | 2.026807493 | 3.808794102  | 5.80E-06   | 0.00070264 | B3GALT5       | 21         | 39556442       | 39673137     | 1      |
| ENSG00000266074  | 2.56603418  | 2.275766652  | 1.87E-05   | 0.00160169 | BAHCC1        | 17         | 81395475       | 81466332     | 1      |
| ENSG00000258643  | 2.040905642 | 3.774967539  | 3.86E-05   | 0.00262916 | BCL2L2-PABPN1 | 14         | 23306835       | 23325369     | 1      |
| ENSG00000176697  | -3.39606855 | 4.716966021  | 1.22E-05   | 0.00119578 | BDNF          | 11         | 27654893       | 27722058     | -1     |
| ENSG00000125378  | -3.57786062 | 2.089552973  | 8.67E-06   | 0.0009617  | BMP4          | 14         | 53949736       | 53958761     | -1     |
| ENSG00000169594  | -9.14338629 | 0.718516128  | 3.77E-06   | 0.00051868 | BNC1          | 15         | 83255903       | 83284716     | -1     |
| ENSG00000139618  | 2.213787091 | 4.558045861  | 0.00016699 | 0.00717547 | BRCAC2        | 13         | 32315474       | 32400266     | 1      |
| ENSG00000174744  | -1.56403198 | 4.981349918  | 1.61E-05   | 0.0014259  | BRMS1         | 11         | 66337333       | 66345125     | -1     |
| ENSG000001056167 | 1.120818799 | 6.113200555  | 0.00023875 | 0.00923063 | BTRC          | 10         | 101354033      | 101557321    | 1      |
| ENSG00000173237  | -4.66712549 | 1.385861746  | 8.90E-05   | 0.00472765 | C11orf86      | 11         | 66975277       | 66977004     | 1      |
| ENSG00000103544  | 1.139984867 | 5.988212709  | 0.00022096 | 0.00868116 | C16orf62      | 16         | 19555240       | 19706793     | 1      |
| ENSG00000116922  | -1.06549011 | 5.110172111  | 0.00023524 | 0.00912581 | C1orf109      | 1          | 37681570       | 37692249     | -1     |
| ENSG00000162757  | -1.78565816 | 2.801233188  | 0.00010852 | 0.00541712 | C1orf74       | 1          | 209779208      | 209784559    | -1     |
| ENSG00000184208  | 1.654476439 | 4.617715987  | 7.34E-05   | 0.00415125 | C22orf46      | 22         | 41688939       | 41698136     | 1      |
| ENSG00000153790  | 2.709801317 | 2.16531769   | 3.90E-05   | 0.00263676 | C7orf31       | 7          | 25134697       | 25180356     | -1     |
| ENSG00000270024  | -4.0923518  | 0.063378313  | 0.00017977 | 0.00756188 | C8orf44-SGK3  | 8          | 66667596       | 66860472     | 1      |
| ENSG00000105605  | 1.886469575 | 3.461360566  | 4.45E-05   | 0.00286491 | CACNG7        | 19         | 53909335       | 53943941     | 1      |
| ENSG00000112186  | 1.728776194 | 5.003458437  | 8.91E-06   | 0.00097836 | CAP2          | 6          | 17393216       | 17557792     | 1      |
| ENSG00000106144  | 2.172075416 | 3.832153993  | 7.67E-06   | 0.00087131 | CASP2         | 7          | 143288215      | 143307696    | 1      |
| ENSG00000110395  | 1.910078933 | 6.152916062  | 1.25E-05   | 0.00121351 | CBL           | 11         | 119206276      | 119308149    | 1      |
| ENSG00000141668  | -1.78565816 | 0.410709741  | 0.00015635 | 0.00689271 | CBLN2         | 18         | 72536680       | 72638521     | -1     |
| ENSG00000094916  | 1.6259289   | 9.256712441  | 5.57E-06   | 0.00068225 | CBX5          | 12         | 54230940       | 54280133     | -1     |
| ENSG00000171097  | -1.45073622 | 3.481666145  | 1.54E-05   | 0.00137668 | CCBL1         | 9          | 128832942      | 128882494    | -1     |
| ENSG00000115355  | 1.815413816 | 8.0772405    | 3.81E-05   | 0.00260886 | CCDC88A       | 2          | 55287842       | 55419921     | -1     |
| ENSG00000100814  | -1.24832962 | 5.535003948  | 0.00015925 | 0.00693964 | CENB1P1       | 14         | 20311368       | 20333312     | -1     |
| ENSG00000112576  | -2.14112492 | 5.205687999  | 6.76E-05   | 0.0038677  | CCND3         | 6          | 41934933       | 42050357     | -1     |
| ENSG00000085117  | -2.11408192 | 2.220962502  | 2.62E-05   | 0.00204894 | CD82          | 11         | 44564427       | 44620363     | 1      |
| ENSG00000062038  | -2.78576871 | 1.508043531  | 9.38E-05   | 0.00490504 | CDH3          | 6          | 68636189       | 68722616     | 1      |
| ENSG00000124762  | -2.19978251 | 6.758797041  | 3.99E-07   | 0.00010033 | CDKN1A        | 6          | 36676460       | 36687339     | 1      |
| ENSG00000140743  | -2.14525865 | 4.306373817  | 4.83E-05   | 0.00305784 | CDR2          | 16         | 22345936       | 22437165     | -1     |
| ENSG00000245848  | -4.8551539  | 1.506866743  | 6.16E-07   | 0.00013407 | CEBPA         | 19         | 33299934       | 33302564     | -1     |
| ENSG00000048740  | 1.466101778 | 6.380695923  | 0.00018647 | 0.00774334 | CELF2         | 10         | 11005321       | 11336675     | 1      |
| ENSG00000138135  | -7.99977526 | 0.813848965  | 2.50E-06   | 0.00038285 | CH25H         | 10         | 89205629       | 89207314     | -1     |
| ENSG00000171316  | 1.600673077 | 7.136992552  | 9.00E-05   | 0.00474939 | CHD7          | 8          | 60678778       | 60868028     | 1      |
| ENSG00000175505  | -6.82721243 | 2.750227796  | 4.95E-09   | 3.80E-06   | CLCF1         | 11         | 67364168       | 67374177     | -1     |
| ENSG00000189143  | -6.39939026 | -1.018906761 | 3.16E-05   | 0.00231871 | CLDN4         | 7          | 73799542       | 73832693     | 1      |
| ENSG00000182372  | -2.08814669 | 1.36839799   | 7.96E-05   | 0.00440915 | CLN8          | 8          | 1755778        | 1786572      | 1      |
| ENSG00000205423  | -1.14268393 | 4.977347113  | 0.00012065 | 0.00586239 | CNEP1R1       | 16         | 50024410       | 50037088     | 1      |
| ENSG00000137161  | 1.347814595 | 4.780228075  | 0.000158   | 0.00693816 | CNPY3         | 6          | 42929192       | 42939287     | 1      |
| ENSG00000136152  | -1.09486431 | 6.201055456  | 6.44E-05   | 0.00374578 | COG3          | 13         | 45464898       | 45536630     | 1      |
| ENSG00000133103  | -1.102308   | 6.200708431  | 0.00021724 | 0.00857445 | COG6          | 13         | 39655627       | 39791665     | 1      |
| ENSG00000129083  | -1.24412521 | 8.166996322  | 6.07E-05   | 0.00359113 | COPB1         | 11         | 14443440       | 14500027     | -1     |
| ENSG00000115520  | -2.10057354 | 5.625102204  | 7.88E-07   | 0.00015736 | COQ10B        | 2          | 197453423      | 197475308    | 1      |
| ENSG00000112695  | -1.38459647 | 6.297261301  | 6.76E-06   | 0.00078638 | COX7A2        | 6          | 75237675       | 75250323     | -1     |
| ENSG00000143320  | -3.9138906  | 3.074196642  | 2.32E-05   | 0.00187929 | CRABP2        | 1          | 156699606      | 156705816    | -1     |

|                 |             |              |            |            |          |    |           |           |    |
|-----------------|-------------|--------------|------------|------------|----------|----|-----------|-----------|----|
| ENSG00000107175 | -1.08138338 | 6.041241525  | 8.22E-05   | 0.00448861 | CREB3    | 9  | 35732320  | 35737007  | 1  |
| ENSG00000060610 | 2.492247603 | 3.74777982   | 0.00018685 | 0.00774414 | CRLF1    | 19 | 18572220  | 18607741  | -1 |
| ENSG00000144655 | -3.0103787  | 5.184234624  | 3.01E-06   | 0.00043461 | CSRNP1   | 3  | 39141855  | 39154562  | -1 |
| ENSG00000175215 | 1.762802896 | 6.584629159  | 5.66E-05   | 0.00340453 | CTDSP2   | 12 | 57819927  | 57846739  | -1 |
| ENSG00000180891 | 1.397876847 | 5.922072132  | 2.34E-05   | 0.00189191 | CUEDC1   | 17 | 57861243  | 57955323  | -1 |
| ENSG00000163739 | -8.59403292 | -0.298110196 | 2.73E-05   | 0.00212454 | CXCL1    | 4  | 73869393  | 73871242  | 1  |
| ENSG00000169429 | -6.78689405 | -0.798133808 | 1.20E-06   | 0.00021257 | CXCL8    | 4  | 73740506  | 73743716  | 1  |
| ENSG00000166394 | -4.01790763 | -0.358530741 | 3.36E-05   | 0.00238179 | CYB5R2   | 11 | 7665100   | 7677222   | -1 |
| ENSG00000070190 | -2.45721933 | -1.150277891 | 4.90E-05   | 0.00309892 | DAPP1    | 4  | 99816833  | 99870154  | 1  |
| ENSG00000136485 | 1.500070624 | 6.981807686  | 2.28E-05   | 0.00186093 | DCAF7    | 17 | 63550461  | 63594266  | 1  |
| ENSG00000167986 | -0.90655258 | 9.066884553  | 0.00024539 | 0.00941805 | DBB1     | 11 | 61299451  | 61342596  | -1 |
| ENSG00000134574 | -2.15804994 | 4.604915871  | 4.51E-06   | 0.00058714 | DBB2     | 11 | 47214465  | 47239240  | 1  |
| ENSG00000175197 | -2.45721933 | 4.93268177   | 9.58E-07   | 0.00018083 | DDIT3    | 12 | 57516588  | 57520517  | -1 |
| ENSG00000168209 | -2.20429252 | 5.410296971  | 0.00012125 | 0.00587163 | DDIT4    | 10 | 72273920  | 72276036  | 1  |
| ENSG00000175984 | -2.63887951 | 0.717835649  | 0.00014324 | 0.00654413 | DENND2C  | 1  | 114582848 | 114670422 | -1 |
| ENSG00000139734 | 2.075711292 | 3.722667039  | 0.00016085 | 0.00698207 | DIAPH3   | 13 | 59665583  | 60163987  | -1 |
| ENSG00000165023 | -1.66084565 | 7.080962029  | 0.0001055  | 0.00529771 | DIRAS2   | 9  | 90609832  | 90643104  | -1 |
| ENSG00000050165 | -1.93919907 | 10.0698347   | 0.0001425  | 0.00651906 | DKK3     | 11 | 11963106  | 12009769  | -1 |
| ENSG00000104936 | 1.412358732 | 4.537357012  | 3.14E-05   | 0.0023122  | DMPK     | 19 | 45769717  | 45782552  | -1 |
| ENSG00000185800 | 1.264830051 | 4.700760747  | 3.25E-05   | 0.00233695 | DMWD     | 19 | 45782947  | 45792802  | -1 |
| ENSG00000135392 | -1.32298542 | 5.496769375  | 0.00013467 | 0.00626229 | DNAIC14  | 12 | 55820960  | 55830824  | -1 |
| ENSG00000130816 | 1.308082321 | 5.500927292  | 0.00025442 | 0.00960713 | DNMT1    | 19 | 10133345  | 10231286  | -1 |
| ENSG00000135905 | 1.597838215 | 6.67383479   | 0.00012973 | 0.0060851  | DOCK10   | 2  | 224765090 | 225042445 | -1 |
| ENSG00000111817 | -2.19040635 | 5.487341487  | 4.35E-07   | 0.00010542 | DSE      | 6  | 116254173 | 116444860 | 1  |
| ENSG00000096696 | -3.48779062 | 4.511778525  | 0.00023391 | 0.00909506 | DSP      | 6  | 7541575   | 7586717   | 1  |
| ENSG00000120129 | -2.02862233 | 4.799963199  | 4.30E-05   | 0.00280619 | DUSP1    | 5  | 172768090 | 172771195 | -1 |
| ENSG00000165891 | 1.786569315 | 3.682364473  | 0.00010739 | 0.00537663 | E2F7     | 12 | 77021247  | 77065580  | -1 |
| ENSG00000145194 | -3.18789806 | 1.353649407  | 1.09E-06   | 0.00019959 | ECE2     | 3  | 184249650 | 184293031 | 1  |
| ENSG00000127129 | -1.66084565 | -1.506669986 | 8.16E-05   | 0.0044757  | EDN2     | 1  | 41478775  | 41484673  | -1 |
| ENSG00000124205 | -9.65202379 | -0.247906413 | 0.00022781 | 0.00890887 | EDN3     | 20 | 59300427  | 59325992  | 1  |
| ENSG00000169242 | -3.33172059 | 2.492452693  | 2.36E-08   | 1.23E-05   | EFNA1    | 1  | 155127460 | 155134857 | 1  |
| ENSG00000146648 | 2.4241309   | 4.978863659  | 1.17E-05   | 0.00114891 | EGFR     | 7  | 55019021  | 55256620  | 1  |
| ENSG00000122877 | -5.17289297 | 2.20986425   | 9.04E-06   | 0.0009804  | EGR2     | 10 | 62811996  | 62919900  | -1 |
| ENSG00000179388 | -5.92338554 | 0.400184636  | 0.00012528 | 0.00598653 | EGR3     | 8  | 22687659  | 22693302  | -1 |
| ENSG00000024422 | 2.037455454 | 2.220456855  | 0.00015342 | 0.00683759 | EHD2     | 19 | 47713343  | 47743134  | 1  |
| ENSG00000172071 | -1.77917633 | 6.1911559    | 2.88E-06   | 0.00042189 | EIF2AK3  | 2  | 88556741  | 88627576  | -1 |
| ENSG00000148730 | 1.403908856 | 6.534875967  | 3.19E-05   | 0.00233505 | EIF4EBP2 | 10 | 70404379  | 70428618  | 1  |
| ENSG00000132205 | -5.24781728 | 1.30162427   | 7.24E-06   | 0.00083309 | EMILIN2  | 18 | 2847030   | 2915993   | 1  |
| ENSG00000134531 | -2.39908352 | 7.083612685  | 7.46E-05   | 0.00421402 | EMP1     | 12 | 13196716  | 13219939  | 1  |
| ENSG00000142627 | -3.10555777 | 3.236182694  | 3.06E-05   | 0.00229336 | EPHA2    | 1  | 16124337  | 16156087  | -1 |
| ENSG00000143819 | 2.637277523 | 4.879749349  | 9.06E-07   | 0.00017382 | EPHX1    | 1  | 225810092 | 225845563 | 1  |
| ENSG00000063245 | 1.775378209 | 3.954092936  | 9.74E-05   | 0.00502481 | EPN1     | 19 | 55675226  | 55709858  | 1  |
| ENSG00000082805 | 1.273105701 | 6.625043031  | 0.00021554 | 0.00854065 | ERC1     | 12 | 990509    | 1495933   | 1  |
| ENSG00000124882 | -8.96577946 | -0.542882529 | 2.10E-05   | 0.00175307 | EREG     | 4  | 74365143  | 74388751  | 1  |
| ENSG00000115363 | -3.1673647  | 4.602192499  | 3.30E-05   | 0.00235482 | EVA1A    | 2  | 75469302  | 75569722  | -1 |
| ENSG00000168040 | -2.0567543  | 4.572728357  | 7.83E-07   | 0.00015731 | FADD     | 11 | 70203163  | 70207390  | 1  |
| ENSG00000048828 | 1.431698779 | 6.439713467  | 0.00012979 | 0.0060851  | FAM120A  | 9  | 93451722  | 93566107  | 1  |
| ENSG00000175182 | -1.66419857 | 6.116488376  | 0.00018793 | 0.00776991 | FAM131A  | 3  | 184335926 | 184346275 | 1  |
| ENSG00000170264 | 1.294686552 | 4.68921851   | 0.0001436  | 0.00655153 | FAM161A  | 2  | 61824854  | 61854143  | -1 |
| ENSG00000143340 | -6.45941544 | -1.087414026 | 7.84E-05   | 0.00435654 | FAM163A  | 1  | 179743163 | 179816198 | 1  |
| ENSG00000164125 | 1.948660687 | 6.376637239  | 0.00015793 | 0.00693816 | FAM198B  | 4  | 158124474 | 158173318 | -1 |
| ENSG00000185614 | -4.85952159 | -0.569596941 | 4.02E-05   | 0.00266289 | FAM212A  | 3  | 49803254  | 49805030  | 1  |
| ENSG00000157870 | 1.942754008 | 1.446245656  | 9.42E-05   | 0.00490504 | FAM213B  | 1  | 2586491   | 2591469   | 1  |
| ENSG00000158246 | -2.39053937 | 3.569520685  | 2.90E-05   | 0.00220173 | FAM46B   | 1  | 27005020  | 27012836  | -1 |
| ENSG00000166595 | -1.19281525 | 5.283341797  | 0.0001087  | 0.00541814 | FAM96B   | 16 | 66932055  | 66934423  | -1 |
| ENSG00000165323 | 1.466231319 | 8.294316082  | 0.0001091  | 0.00542955 | FAT3     | 11 | 92352096  | 92896470  | 1  |
| ENSG00000068078 | -1.77396867 | 4.988305361  | 0.00025495 | 0.00961574 | FGFR3    | 4  | 1793307   | 1808872   | 1  |
| ENSG00000115641 | -2.83340984 | 5.077366105  | 5.69E-05   | 0.00340453 | FHL2     | 2  | 105357712 | 105438513 | -1 |
| ENSG00000119686 | -2.19609569 | 3.609216288  | 0.00010835 | 0.00541648 | FLVCR2   | 14 | 75578617  | 75663214  | 1  |
| ENSG00000170345 | -3.02139677 | 6.131075147  | 3.58E-06   | 0.00049746 | FOS      | 14 | 75278774  | 75282230  | 1  |
| ENSG00000125740 | -4.91784987 | 0.545861888  | 0.00014913 | 0.00671285 | FOSB     | 19 | 45467995  | 45475179  | 1  |
| ENSG00000111206 | 2.742403777 | 3.394718124  | 0.00023077 | 0.00899367 | FOXM1    | 12 | 2857681   | 2877155   | -1 |
| ENSG00000053254 | 1.514785847 | 5.868857338  | 0.00018919 | 0.00779372 | FOXN3    | 14 | 89124871  | 89619149  | -1 |
| ENSG00000100350 | 1.817256167 | 3.540113279  | 8.27E-05   | 0.00449769 | FOXRED2  | 22 | 36487190  | 36507101  | -1 |
| ENSG00000183090 | -8.02528964 | -1.839209675 | 0.00019462 | 0.00794041 | FREM3    | 4  | 143577302 | 143700675 | -1 |
| ENSG00000130383 | -8.5172783  | -0.344833082 | 1.59E-08   | 9.02E-06   | FUT5     | 19 | 5865826   | 5870540   | -1 |
| ENSG00000129245 | -1.45815453 | 6.313926083  | 7.38E-07   | 0.00015277 | FXR2     | 17 | 7591230   | 7614871   | -1 |
| ENSG00000157240 | -2.27651034 | 4.87220357   | 0.00012126 | 0.00587163 | FZD1     | 7  | 91264364  | 91271326  | 1  |
| ENSG00000141349 | 1.516591566 | 5.011770258  | 0.00011464 | 0.00563136 | G6PC3    | 17 | 44070735  | 44076344  | 1  |
| ENSG00000099860 | -2.26290176 | 3.517477303  | 0.00026691 | 0.0099893  | GADD45B  | 19 | 2476122   | 2478259   | 1  |
| ENSG00000185340 | 1.690427378 | 4.228045083  | 0.00020864 | 0.00838135 | GAS2L1   | 22 | 29306582  | 29312785  | 1  |
| ENSG00000130283 | 3.057149765 | 2.13113686   | 8.04E-08   | 2.87E-05   | GDF1     | 19 | 18868545  | 18896096  | -1 |
| ENSG00000164949 | -2.83629104 | 6.093384966  | 7.39E-08   | 2.73E-05   | GEM      | 8  | 94249253  | 94262350  | -1 |
| ENSG00000198380 | -1.15618117 | 7.315628599  | 0.00023424 | 0.00909766 | GFPT1    | 2  | 69319769  | 69387254  | -1 |
| ENSG00000138604 | -1.29897918 | 5.547006869  | 0.0002196  | 0.00863775 | GLCE     | 15 | 69160584  | 69272217  | 1  |
| ENSG00000074047 | 3.06137469  | 1.911911388  | 7.57E-07   | 0.00015485 | GLI2     | 2  | 120735623 | 120992653 | 1  |
| ENSG00000065325 | -6.84203546 | -1.614563761 | 0.00017638 | 0.00743751 | GLP2R    | 17 | 9822206   | 9892102   | 1  |
| ENSG00000134697 | -1.17462934 | 6.182138566  | 0.00010718 | 0.00537383 | GNL2     | 1  | 37566816  | 37595935  | -1 |
| ENSG00000130119 | 1.457849632 | 4.481831178  | 5.37E-05   | 0.00329555 | GNL3L    | X  | 54530211  | 54561071  | 1  |
| ENSG00000111711 | -1.41836632 | 6.243292148  | 5.88E-06   | 0.0007061  | GOLT1B   | 12 | 21501781  | 21518408  | 1  |
| ENSG00000152208 | 2.078920186 | 5.609443028  | 0.00012906 | 0.00606772 | GRID2    | 4  | 92303622  | 93774556  | 1  |

|                 |             |              |            |            |           |    |           |           |    |
|-----------------|-------------|--------------|------------|------------|-----------|----|-----------|-----------|----|
| ENSG00000171189 | 1.410812466 | 5.628320155  | 4.76E-05   | 0.00303238 | GRIK1     | 21 | 29536933  | 29940033  | -1 |
| ENSG00000109519 | -1.15673548 | 5.165000191  | 6.86E-05   | 0.0039178  | GRPEL1    | 4  | 7058906   | 7068197   | -1 |
| ENSG00000137947 | -1.56930888 | 5.126177731  | 1.67E-05   | 0.00145893 | GTF2B     | 1  | 88852932  | 88891944  | -1 |
| ENSG00000125812 | -1.34306804 | 5.337951767  | 0.00012593 | 0.0059955  | GZF1      | 20 | 23362182  | 23373063  | 1  |
| ENSG00000132475 | -1.15475316 | 9.198621302  | 3.29E-06   | 0.00047103 | H3FB3     | 17 | 75776434  | 75785893  | -1 |
| ENSG00000188375 | -9.35723204 | 1.316069564  | 4.24E-09   | 3.51E-06   | H3F3C     | 12 | 31791185  | 31792241  | -1 |
| ENSG00000063854 | -1.34499027 | 5.140519307  | 0.0001557  | 0.00688199 | HAGH      | 16 | 1795620   | 1827194   | -1 |
| ENSG00000103044 | -3.10739989 | 2.4045056    | 0.00012791 | 0.00605553 | HAS3      | 16 | 69105564  | 69118719  | 1  |
| ENSG00000113070 | -3.01131798 | 5.214624364  | 0.00014039 | 0.00645746 | HBEGF     | 5  | 140332843 | 140346631 | -1 |
| ENSG00000172534 | 2.173588374 | 4.422691812  | 0.00018495 | 0.00772003 | HCFC1     | X  | 153947553 | 153971807 | -1 |
| ENSG00000108840 | -1.47942637 | 5.044302612  | 8.61E-05   | 0.00461885 | HDAC5     | 17 | 44076746  | 44123702  | -1 |
| ENSG00000119969 | 1.777722709 | 4.744569487  | 1.95E-05   | 0.00164709 | HELLS     | 10 | 94501434  | 94613905  | 1  |
| ENSG00000165478 | 2.245251328 | 5.297683204  | 9.33E-05   | 0.00489682 | HEPACAM   | 11 | 124919193 | 124936412 | -1 |
| ENSG00000051108 | -1.69218227 | 6.538008819  | 4.04E-06   | 0.00054398 | HERPUD1   | 16 | 56932048  | 56944863  | 1  |
| ENSG00000177374 | -3.82497699 | 1.073253342  | 1.47E-05   | 0.00133803 | HIC1      | 17 | 2054154   | 2063241   | -1 |
| ENSG00000064393 | 1.993153699 | 6.721978169  | 1.38E-05   | 0.00129343 | HIPK2     | 7  | 139561570 | 139777778 | -1 |
| ENSG00000125903 | 2.565333105 | 2.588717964  | 0.0001144  | 0.0056282  | HIST1H2AL | 6  | 27865355  | 27865747  | 1  |
| ENSG00000170144 | 1.491748759 | 6.694731971  | 8.25E-05   | 0.0044961  | HNRNPA3   | 2  | 177212563 | 177223958 | 1  |
| ENSG00000105323 | 1.559483572 | 6.525202414  | 3.22E-05   | 0.00233695 | HNRNPUL1  | 19 | 41262496  | 41307598  | 1  |
| ENSG00000152413 | -2.46492465 | 5.43160967   | 1.45E-07   | 4.73E-05   | HOMER1    | 5  | 79372636  | 79514217  | -1 |
| ENSG00000134709 | -2.71142384 | 2.899131662  | 4.86E-06   | 0.00062005 | HOOK1     | 1  | 59814786  | 59876378  | 1  |
| ENSG00000257017 | -5.66076164 | 5.467698387  | 2.25E-05   | 0.0018486  | HP        | 16 | 72054592  | 72061055  | 1  |
| ENSG00000166189 | -1.41525806 | 4.00329844   | 0.00015884 | 0.00693964 | HPS6      | 10 | 102065390 | 102068038 | 1  |
| ENSG00000102878 | -4.03320197 | 0.812078997  | 3.35E-05   | 0.00238041 | HSF4      | 16 | 67164681  | 67169945  | 1  |
| ENSG00000106211 | 2.069228644 | 3.271859312  | 0.00026201 | 0.00042734 | HSPB1     | 17 | 76302544  | 76304295  | 1  |
| ENSG00000086758 | 1.358460632 | 8.196181528  | 0.00015857 | 0.00693964 | HUWE1     | X  | 53532096  | 53686729  | -1 |
| ENSG00000068001 | -1.40529516 | 5.581848179  | 0.00025134 | 0.00955387 | HYAL2     | 3  | 50317790  | 50322906  | -1 |
| ENSG00000105376 | -4.79464077 | -0.078460229 | 1.40E-05   | 0.00129343 | ICAM5     | 19 | 10289981  | 10296778  | 1  |
| ENSG00000125968 | -7.30965818 | 2.792491849  | 1.01E-05   | 0.00105155 | ID1       | 20 | 31605283  | 31606515  | 1  |
| ENSG00000115738 | -2.56257989 | 6.528157348  | 9.24E-05   | 0.00485715 | ID2       | 2  | 8678845   | 8684453   | 1  |
| ENSG00000117318 | -7.09077778 | 2.304687587  | 1.42E-05   | 0.00129733 | ID3       | 1  | 23557918  | 23559794  | -1 |
| ENSG00000010404 | 1.767427932 | 7.420639745  | 8.96E-05   | 0.00474235 | IDS       | X  | 149476990 | 149521096 | -1 |
| ENSG00000137331 | -4.11605617 | -0.116805466 | 2.95E-06   | 0.00042734 | IER3      | 6  | 30743199  | 30744554  | -1 |
| ENSG00000134049 | -0.97818234 | 5.620019925  | 0.00022976 | 0.00897441 | IER3IP1   | 18 | 47152998  | 47176374  | -1 |
| ENSG00000017427 | -5.9068136  | 1.296953989  | 1.40E-05   | 0.00129343 | IGF1      | 12 | 102395867 | 102480645 | -1 |
| ENSG00000159217 | 1.890558385 | 3.921673694  | 0.00021532 | 0.00854065 | IGF2BP1   | 17 | 48997412  | 49055650  | 1  |
| ENSG00000146674 | -3.82439349 | 5.430971409  | 2.78E-07   | 7.48E-05   | IGFBP3    | 7  | 45912245  | 45921874  | -1 |
| ENSG00000141753 | -3.1712335  | 5.655942907  | 1.10E-05   | 0.00110192 | IGFBP4    | 17 | 40443461  | 40457731  | 1  |
| ENSG00000123411 | 2.086249249 | 1.985795465  | 7.54E-05   | 0.00424242 | IKZF4     | 12 | 56007659  | 56038435  | 1  |
| ENSG00000095752 | -5.84370557 | 4.525540108  | 1.39E-09   | 1.48E-06   | IL11      | 19 | 55364389  | 55370463  | -1 |
| ENSG00000115008 | -4.67722257 | -0.444811074 | 2.81E-05   | 0.00215999 | IL1A      | 2  | 112773915 | 112784590 | -1 |
| ENSG00000139269 | -8.30880392 | -0.001162428 | 2.78E-05   | 0.00214881 | INHBE     | 12 | 57452323  | 57459280  | 1  |
| ENSG00000127080 | -1.74806872 | 4.741255773  | 1.67E-05   | 0.00145893 | IPPK      | 9  | 92613184  | 92670265  | -1 |
| ENSG00000126456 | -1.50352636 | 4.947145701  | 3.33E-05   | 0.00237152 | IRF3      | 19 | 49659569  | 49665875  | -1 |
| ENSG00000063241 | -1.41175261 | 3.845029601  | 0.00017807 | 0.00749966 | ISOC2     | 19 | 55452985  | 55462343  | -1 |
| ENSG00000123104 | 1.177638702 | 8.34927576   | 4.24E-05   | 0.00277542 | ITPR2     | 12 | 26336515  | 26833198  | -1 |
| ENSG00000081692 | -2.19496727 | 4.722943878  | 0.00010463 | 0.00529669 | JMJD4     | 1  | 227730425 | 227735411 | -1 |
| ENSG00000171223 | -3.39945454 | 3.461049978  | 0.00016899 | 0.00721021 | JUNB      | 19 | 12791496  | 12793315  | 1  |
| ENSG00000186994 | -3.51112663 | 0.241720465  | 1.03E-05   | 0.0010646  | KANK3     | 19 | 8322584   | 8343262   | -1 |
| ENSG00000132854 | -4.91402242 | 0.535239883  | 5.28E-05   | 0.00327854 | KANK4     | 1  | 62236979  | 62319414  | -1 |
| ENSG00000107821 | -3.20728536 | 1.803094983  | 1.56E-05   | 0.00139392 | KAZALD1   | 10 | 101061841 | 101068131 | 1  |
| ENSG00000182255 | -3.98695401 | 3.987678844  | 9.22E-06   | 0.00099012 | KCNA4     | 11 | 30009741  | 30017023  | -1 |
| ENSG00000152049 | -5.41903719 | 4.911773659  | 5.31E-08   | 2.16E-05   | KCNE4     | 2  | 223051814 | 223198399 | 1  |
| ENSG00000162975 | -2.87070618 | 4.835595192  | 7.98E-05   | 0.00441293 | KCNF1     | 2  | 10911937  | 10914225  | 1  |
| ENSG00000177807 | 1.743318258 | 3.792576151  | 1.05E-05   | 0.0010721  | KCNJ10    | 1  | 160037467 | 160070248 | -1 |
| ENSG00000124249 | -8.86291478 | -1.635222015 | 8.45E-05   | 0.00456227 | KCNK15    | 20 | 44745780  | 44752313  | 1  |
| ENSG00000143603 | 2.484524994 | 6.399417611  | 1.15E-05   | 0.00113967 | KCNN3     | 1  | 154697455 | 154870280 | -1 |
| ENSG00000100196 | -2.88294561 | 4.307270058  | 9.87E-07   | 0.00018517 | KDEL3     | 22 | 38468062  | 38483447  | 1  |
| ENSG00000166783 | 1.982313244 | 4.349340043  | 3.26E-05   | 0.00233695 | KIAA0430  | 16 | 15594386  | 15643166  | -1 |
| ENSG00000100578 | 1.336521153 | 5.067540341  | 4.65E-05   | 0.0029706  | KIAA0586  | 14 | 58427385  | 58551289  | 1  |
| ENSG00000186185 | 2.505089299 | 2.313012922  | 0.00020731 | 0.00836511 | KIF18B    | 17 | 44924709  | 44947711  | -1 |
| ENSG00000155090 | -4.18157766 | 4.836430542  | 1.31E-06   | 0.00022977 | KLF10     | 8  | 102648779 | 102655902 | -1 |
| ENSG00000118922 | 1.413175346 | 6.318967689  | 6.32E-05   | 0.00370673 | KLF12     | 13 | 73686089  | 74133905  | -1 |
| ENSG00000109787 | 1.695730415 | 5.681356265  | 4.59E-05   | 0.00294558 | KLF3      | 4  | 38664196  | 38701042  | 1  |
| ENSG00000198841 | -2.13479727 | 3.399760417  | 2.56E-05   | 0.00202231 | KTI12     | 1  | 52032103  | 52033816  | -1 |
| ENSG00000131023 | 1.570653785 | 5.39659299   | 0.00014648 | 0.00662965 | LATS1     | 6  | 149658153 | 149718256 | -1 |
| ENSG00000204381 | -3.05841167 | 3.386424509  | 0.00013312 | 0.00620696 | LAYN      | 11 | 111540280 | 111561745 | 1  |
| ENSG00000168806 | -1.94433065 | 4.578901244  | 6.07E-05   | 0.00359113 | LCMT2     | 15 | 43323649  | 43330605  | -1 |
| ENSG00000179241 | 1.468471938 | 5.426171319  | 3.12E-05   | 0.00230997 | LDLRAD3   | 11 | 35943981  | 36232136  | 1  |
| ENSG00000105617 | -2.08818194 | 0.996353435  | 0.00012821 | 0.00605776 | LENG1     | 19 | 54155161  | 54159882  | -1 |
| ENSG00000116678 | -1.90008272 | 3.542200403  | 2.03E-06   | 0.0003289  | LEPR      | 1  | 65420652  | 65641559  | 1  |
| ENSG00000128342 | -5.2604163  | 3.672557436  | 6.16E-10   | 8.29E-07   | LIF       | 22 | 30240447  | 30246851  | -1 |
| ENSG00000160789 | -1.93346438 | 6.865071882  | 0.00021305 | 0.00849887 | LMNA      | 1  | 156082573 | 156140089 | 1  |
| ENSG00000147650 | -1.20053277 | 5.789800405  | 0.00021307 | 0.00849887 | LRP12     | 8  | 104489231 | 104589024 | -1 |
| ENSG00000137269 | -1.42814017 | 3.340284454  | 0.00025999 | 0.0097626  | LRRC1     | 6  | 53794497  | 53924121  | 1  |
| ENSG00000171017 | -2.92153668 | 1.955668614  | 7.83E-07   | 0.00015731 | LRRC8E    | 19 | 7888505   | 7902021   | 1  |
| ENSG00000133800 | 5.877576911 | -0.833070442 | 9.58E-05   | 0.00496392 | LYVE1     | 11 | 10556966  | 10611689  | -1 |
| ENSG00000124688 | -1.30724973 | 4.476429677  | 0.00021024 | 0.00843023 | MAD2L1BP  | 6  | 43629540  | 43640952  | 1  |
| ENSG00000178573 | -1.29848391 | 4.725195677  | 0.00025617 | 0.00965125 | MAF       | 16 | 79585843  | 79600714  | -1 |
| ENSG00000185022 | -3.8746162  | 4.759718361  | 0.00015362 | 0.00683759 | MAFF      | 22 | 38200767  | 38216511  | 1  |
| ENSG00000198042 | -1.42753957 | 5.38855014   | 0.00012831 | 0.00605776 | MAK16     | 8  | 33484750  | 33501260  | 1  |

|                 |             |              |            |            |           |    |           |           |    |
|-----------------|-------------|--------------|------------|------------|-----------|----|-----------|-----------|----|
| ENSG00000166963 | 2.182288515 | 7.338060072  | 2.42E-05   | 0.00194391 | MAP1A     | 15 | 43510958  | 43531620  | 1  |
| ENSG00000168175 | 1.229825148 | 6.374797731  | 8.45E-05   | 0.00456227 | MAPK1IP1L | 14 | 55051631  | 55070192  | 1  |
| ENSG00000166603 | -3.02867101 | 1.759825548  | 8.93E-06   | 0.00097836 | MC4R      | 18 | 60371110  | 60372775  | -1 |
| ENSG00000128285 | -3.08545537 | 3.554483127  | 9.46E-07   | 0.00018031 | MCHR1     | 22 | 40678750  | 40682814  | 1  |
| ENSG00000137337 | 2.163474395 | 1.392086492  | 0.00016064 | 0.00698207 | MDC1      | 6  | 30699807  | 30717889  | -1 |
| ENSG00000130772 | -1.32789956 | 3.427520908  | 0.00024518 | 0.00941805 | MED18     | 1  | 28329002  | 28335967  | 1  |
| ENSG00000159479 | -1.27876504 | 4.784326246  | 5.37E-05   | 0.00329555 | MED8      | 1  | 43383917  | 43389808  | -1 |
| ENSG00000197614 | -5.25770941 | 1.128999911  | 0.00026138 | 0.00980387 | MFAP5     | 12 | 8637346   | 8662888   | -1 |
| ENSG00000166670 | -4.48452004 | 5.795975297  | 2.30E-06   | 0.00036157 | MGAT2     | 14 | 49620795  | 49623481  | 1  |
| ENSG00000008394 | 2.197397001 | 6.254232942  | 1.41E-06   | 0.00024549 | MGST1     | 12 | 16347142  | 16609259  | 1  |
| ENSG00000148773 | 3.239150817 | 5.790455073  | 1.66E-05   | 0.00145247 | MKI67     | 10 | 128096659 | 128126385 | -1 |
| ENSG00000196549 | -6.99295658 | 2.940942471  | 2.56E-07   | 7.04E-05   | MME       | 3  | 155024124 | 155183729 | 1  |
| ENSG00000166670 | -4.48452004 | 5.795975297  | 2.30E-06   | 0.00027877 | MMP10     | 11 | 102770503 | 102780628 | -1 |
| ENSG00000115275 | -1.20552891 | 5.266500301  | 0.0002413  | 0.00930772 | MOGS      | 2  | 74461057  | 74465410  | -1 |
| ENSG00000123562 | -0.95357428 | 8.513411243  | 0.00022151 | 0.00869247 | MORF4L2   | X  | 103675496 | 103688158 | -1 |
| ENSG00000106330 | 1.898094033 | 1.649845716  | 6.05E-05   | 0.00358759 | MOSPD3    | 7  | 100612102 | 100615384 | 1  |
| ENSG00000134042 | 3.251427351 | 3.192156201  | 5.86E-09   | 4.32E-06   | MRO       | 18 | 50795120  | 50825402  | -1 |
| ENSG00000180992 | -1.57895257 | 4.389274862  | 1.38E-05   | 0.00129343 | MRPL14    | 6  | 44113454  | 44127457  | -1 |
| ENSG00000149792 | -1.42892034 | 6.082068531  | 3.81E-06   | 0.00052091 | MRPL49    | 11 | 65122183  | 65127371  | 1  |
| ENSG00000183617 | -1.38946856 | 3.639489571  | 0.00024904 | 0.00948795 | MRPL54    | 19 | 3762664   | 3768575   | 1  |
| ENSG00000125445 | -1.1422854  | 5.617903736  | 7.76E-05   | 0.00433154 | MRPS7     | 17 | 75261674  | 75266373  | 1  |
| ENSG00000198899 | 1.933128921 | 6.387264215  | 5.19E-05   | 0.00323831 | MT-ATP6   | MT | 8527      | 9207      | 1  |
| ENSG00000198804 | 1.904501523 | 10.65560654  | 8.31E-05   | 0.00451148 | MT-CO1    | MT | 5904      | 7445      | 1  |
| ENSG00000198712 | 2.073428106 | 8.428428078  | 2.05E-06   | 0.00033041 | MT-CO2    | MT | 7586      | 8269      | 1  |
| ENSG00000198938 | 2.718280324 | 9.927588903  | 3.44E-07   | 8.79E-05   | MT-CO3    | MT | 9207      | 9990      | 1  |
| ENSG00000198886 | 2.285916951 | 7.503272563  | 2.85E-05   | 0.00217732 | MT-ND4    | MT | 10760     | 12137     | 1  |
| ENSG00000212907 | 2.277970041 | 4.537491705  | 1.90E-05   | 0.0016151  | MT-ND4L   | MT | 10470     | 10766     | 1  |
| ENSG00000242114 | -3.88426566 | 1.062594791  | 4.30E-06   | 0.0005617  | MTFP1     | 22 | 30425530  | 30429053  | 1  |
| ENSG00000065911 | -2.83787849 | 5.484605682  | 0.00012743 | 0.00604972 | MTHFD2    | 2  | 74198562  | 74217565  | 1  |
| ENSG00000256045 | -10.9130676 | -0.286914849 | 9.72E-06   | 0.00102748 | MTRNR2L10 | X  | 55181391  | 55182920  | -1 |
| ENSG00000255823 | -7.29708937 | -0.45795975  | 4.06E-06   | 0.00054522 | MTRNR2L8  | 11 | 10507887  | 10509189  | -1 |
| ENSG00000179820 | 2.055829836 | 3.599112849  | 2.10E-05   | 0.00175307 | MYADM     | 19 | 53866223  | 53876437  | 1  |
| ENSG00000125445 | -6.7653639  | -1.129679754 | 9.83E-05   | 0.00506575 | MYPN      | 10 | 68106117  | 68212017  | 1  |
| ENSG00000138386 | -1.69796144 | 6.928091398  | 1.48E-05   | 0.00133952 | NAB1      | 2  | 190646746 | 190692766 | 1  |
| ENSG00000166886 | -3.8086387  | 6.244569362  | 2.77E-08   | 1.38E-05   | NAB2      | 12 | 57088894  | 57095476  | 1  |
| ENSG00000253506 | -7.10904062 | -0.255816936 | 7.82E-09   | 5.08E-06   | NACA2     | 17 | 61590426  | 61591202  | -1 |
| ENSG00000188613 | 2.12659369  | 2.508065309  | 0.00019352 | 0.00791454 | NANOS1    | 10 | 119029716 | 119033732 | 1  |
| ENSG00000095380 | -1.41453924 | 4.682386711  | 3.37E-05   | 0.00238504 | NANS      | 9  | 98056739  | 98083075  | 1  |
| ENSG00000166833 | 2.140522013 | 5.561078449  | 4.81E-06   | 0.00061806 | NAV2      | 11 | 19350724  | 20121598  | 1  |
| ENSG00000176771 | 2.351896837 | 4.005827119  | 0.00012772 | 0.00605504 | NCKAP5    | 2  | 132671799 | 133568463 | -1 |
| ENSG00000131507 | 1.665043672 | 7.509093845  | 5.20E-06   | 0.00064704 | NDFIP1    | 5  | 142108505 | 142154443 | 1  |
| ENSG00000070614 | 1.472042757 | 6.012448843  | 5.41E-05   | 0.00330642 | NDST1     | 5  | 150485818 | 150558211 | 1  |
| ENSG00000196712 | 1.356949613 | 7.370046821  | 4.81E-05   | 0.0030547  | NF1       | 17 | 31094927  | 31382116  | 1  |
| ENSG00000162599 | 2.149309499 | 8.147739538  | 4.30E-05   | 0.00280619 | NFIA      | 1  | 60865259  | 61462793  | 1  |
| ENSG00000008441 | 2.484092085 | 4.167389969  | 1.73E-05   | 0.00149413 | NFIX      | 19 | 12995608  | 13098796  | 1  |
| ENSG00000163293 | -4.56839555 | 0.010539215  | 6.44E-05   | 0.00374578 | NIPAL1    | 4  | 47914142  | 48040173  | 1  |
| ENSG00000196338 | 1.685624047 | 4.869668443  | 8.54E-05   | 0.00459351 | NLGN3     | X  | 71144831  | 71171201  | 1  |
| ENSG00000197696 | -1.60472422 | 3.530652885  | 7.87E-05   | 0.00436451 | NMB       | 15 | 84655129  | 84658563  | -1 |
| ENSG00000167207 | -3.1767047  | 0.837425688  | 0.00015896 | 0.00693964 | NOD2      | 16 | 50693603  | 50733077  | 1  |
| ENSG00000111641 | -1.25856792 | 5.097285419  | 0.00015926 | 0.00693964 | NOP2      | 12 | 6556863   | 6568691   | -1 |
| ENSG00000197893 | -6.64613673 | -0.383084477 | 9.72E-05   | 0.00502222 | NRAP      | 10 | 113588716 | 113664127 | -1 |
| ENSG00000137404 | 3.486097001 | -0.492784149 | 7.70E-05   | 0.00431577 | NRM       | 6  | 30688047  | 30691420  | -1 |
| ENSG00000198400 | -9.99181236 | -0.057261167 | 3.24E-05   | 0.00236695 | NTRK1     | 1  | 156815640 | 156881850 | 1  |
| ENSG00000120526 | -1.30343671 | 5.024782104  | 0.00021404 | 0.00852776 | NUDCD1    | 8  | 109240919 | 109334385 | -1 |
| ENSG00000136159 | -1.43332267 | 3.797808279  | 3.89E-05   | 0.00263676 | NUDT15    | 13 | 48037567  | 48047222  | 1  |
| ENSG00000126883 | 1.896314926 | 4.84672007   | 9.26E-06   | 0.00099171 | NUP214    | 9  | 131125561 | 131234670 | 1  |
| ENSG00000104904 | -0.97794197 | 7.956639036  | 8.15E-05   | 0.0044757  | OAZ1      | 19 | 2269509   | 2273490   | 1  |
| ENSG00000184221 | 6.545950184 | 1.720486702  | 6.13E-07   | 0.00013407 | OLIG1     | 21 | 33070144  | 33072420  | 1  |
| ENSG00000072682 | -3.44856228 | 4.374085453  | 2.64E-05   | 0.00205761 | P4HA2     | 5  | 132191838 | 132295315 | -1 |
| ENSG00000165912 | -1.68040785 | 3.956672635  | 1.63E-05   | 0.00143762 | PACIN3    | 11 | 47177525  | 47186443  | -1 |
| ENSG00000180370 | 1.418621756 | 6.243794312  | 3.61E-05   | 0.00251287 | PAK2      | 3  | 196739857 | 196832647 | 1  |
| ENSG00000132570 | 1.395293007 | 3.454684066  | 0.00013723 | 0.00635488 | PCBD2     | 5  | 134904906 | 135007959 | 1  |
| ENSG00000280165 | -2.52154474 | 3.195631231  | 0.00018364 | 0.00767682 | PCDH20    | 13 | 61409685  | 61415522  | -1 |
| ENSG00000171815 | 2.766502359 | 1.885473828  | 8.56E-05   | 0.0045979  | PCDHB1    | 5  | 141051135 | 141059344 | 1  |
| ENSG00000240184 | 3.281044059 | 4.172172857  | 0.00012072 | 0.00586239 | PCDHGC3   | 5  | 141475947 | 141512979 | 1  |
| ENSG00000126226 | -1.2726798  | 5.598907529  | 5.84E-06   | 0.00070535 | PCID2     | 13 | 113177539 | 113208715 | -1 |
| ENSG00000102230 | 1.604600696 | 5.553946828  | 0.00017626 | 0.00743751 | PCYT1B    | X  | 24558087  | 24672677  | -1 |
| ENSG00000005882 | 1.577701226 | 4.163452611  | 7.65E-05   | 0.00430042 | PDK2      | 17 | 50094737  | 50112152  | 1  |
| ENSG00000179889 | -1.52315469 | 5.59330175   | 3.23E-05   | 0.00233695 | PDXDC1    | 16 | 14974591  | 15139339  | 1  |
| ENSG00000162734 | 1.087326797 | 9.070553306  | 8.82E-05   | 0.00469395 | PEA15     | 1  | 160205337 | 160215376 | 1  |
| ENSG00000152684 | -1.41615009 | 4.932374915  | 0.00014479 | 0.00657076 | PELO      | 5  | 52787940  | 52804046  | 1  |
| ENSG00000226784 | -6.09461593 | -1.38889734  | 8.43E-05   | 0.00456227 | PGAM4     | X  | 77968874  | 77969638  | -1 |
| ENSG00000243251 | -7.2723137  | -0.234884493 | 9.40E-05   | 0.00490504 | PGBD3     | 10 | 49515105  | 49524227  | -1 |
| ENSG0000013375  | -1.11320424 | 7.711906633  | 0.00016068 | 0.00698207 | PGM3      | 6  | 83161150  | 83193936  | -1 |
| ENSG00000204138 | 2.305030757 | 4.43887893   | 2.32E-05   | 0.00187929 | PHACTR4   | 1  | 28369582  | 28500369  | 1  |
| ENSG00000109118 | 1.91268476  | 4.391225263  | 4.81E-05   | 0.0030547  | PHF12     | 17 | 28905250  | 28951771  | -1 |
| ENSG00000174307 | -2.36425816 | 5.149481922  | 7.10E-06   | 0.00081962 | PHLDA3    | 1  | 201464383 | 201469237 | -1 |
| ENSG00000198355 | -2.24460802 | 2.985518488  | 0.00025403 | 0.00960713 | PIM3      | 22 | 49960513  | 49964080  | -1 |
| ENSG00000087842 | 2.212336005 | 5.094754405  | 4.09E-05   | 0.00269748 | PIR       | X  | 15384799  | 15493564  | -1 |
| ENSG00000197181 | -3.60086316 | -0.102234364 | 1.17E-05   | 0.00114891 | PIWIL2    | 8  | 22275297  | 22357563  | 1  |
| ENSG00000162878 | -3.10259411 | 3.212613213  | 2.42E-05   | 0.00194391 | PKDCC     | 2  | 42048020  | 42058528  | 1  |

|                 |              |              |            |            |           |    |           |           |    |
|-----------------|--------------|--------------|------------|------------|-----------|----|-----------|-----------|----|
| ENSG00000103066 | -1.55872676  | 4.67715187   | 1.88E-05   | 0.00160535 | PLA2G15   | 16 | 68245304  | 68261062  | 1  |
| ENSG00000145632 | -2.10453864  | 6.67558345   | 2.16E-05   | 0.0017873  | PLK2      | 5  | 58453982  | 58460260  | -1 |
| ENSG00000173846 | -2.96630221  | 3.086990399  | 0.0002075  | 0.00836511 | PLK3      | 1  | 44800225  | 44805990  | 1  |
| ENSG00000198753 | 2.808394041  | 2.332424369  | 1.32E-09   | 1.45E-06   | PLXNB3    | X  | 153764196 | 153779346 | 1  |
| ENSG00000141682 | -3.11249641  | 4.170559633  | 8.75E-07   | 0.00017077 | PMAI1P    | 18 | 59899948  | 59904306  | 1  |
| ENSG00000124225 | -2.03610994  | 5.909600276  | 4.03E-05   | 0.00266904 | PMEPA1    | 20 | 57648392  | 57711536  | -1 |
| ENSG00000102978 | -1.36422481  | 6.290083909  | 4.94E-06   | 0.00062837 | POLR2C    | 16 | 57462387  | 57472010  | 1  |
| ENSG00000163882 | -1.2565548   | 4.994729242  | 1.33E-05   | 0.00127185 | POLR2H    | 3  | 184361718 | 184368596 | 1  |
| ENSG00000104356 | -1.60999823  | 3.766861816  | 6.65E-05   | 0.00381969 | POP1      | 8  | 98117297  | 98159834  | 1  |
| ENSG00000077157 | 1.459657205  | 6.045516823  | 0.00012473 | 0.00598008 | PPP1R12B  | 1  | 202348699 | 202592706 | 1  |
| ENSG00000027075 | -8.61777255  | -1.48250452  | 4.42E-05   | 0.00284957 | PRKCH     | 14 | 61187559  | 61550976  | 1  |
| ENSG00000253729 | 1.250429435  | 8.849845544  | 0.00015861 | 0.00693964 | PRKDC     | 8  | 47773108  | 47960183  | -1 |
| ENSG00000172179 | -9.97799476  | -1.435334666 | 5.52E-06   | 0.0006791  | PRL       | 6  | 22287244  | 22297501  | -1 |
| ENSG00000126457 | -1.13970293  | 6.88721548   | 0.00016819 | 0.00721021 | PRMT1     | 19 | 49675786  | 49689029  | 1  |
| ENSG00000117707 | 1.533438159  | 4.79791808   | 0.00012188 | 0.00589367 | PROX1     | 1  | 213983181 | 214041502 | 1  |
| ENSG00000101911 | -2.44757558  | 5.110762377  | 0.00015508 | 0.0068724  | PRPS2     | X  | 12791355  | 12824222  | 1  |
| ENSG00000131467 | 1.307000044  | 5.1379558    | 3.08E-05   | 0.00230095 | PSME3     | 3  | 42824385  | 42843758  | 1  |
| ENSG00000073756 | -7.78867239  | 1.310720215  | 1.42E-05   | 0.00129733 | PTGS2     | 1  | 186671791 | 186680427 | -1 |
| ENSG00000087494 | -4.9767337   | 1.667737001  | 1.16E-06   | 0.00020768 | PTHLH     | 12 | 27958084  | 27972705  | -1 |
| ENSG00000153707 | 1.415317664  | 7.784981017  | 9.42E-05   | 0.00490504 | PTPRD     | 9  | 8314246   | 10612723  | -1 |
| ENSG00000060656 | -3.58737224  | 1.928764615  | 0.00024448 | 0.00940905 | PTPRU     | 1  | 29236516  | 29326813  | 1  |
| ENSG00000106278 | 1.722299691  | 9.546350196  | 5.92E-06   | 0.00070756 | PTPRZ1    | 7  | 121873089 | 122062036 | 1  |
| ENSG00000116260 | -1.82696595  | 4.60666702   | 2.62E-05   | 0.00204894 | QS0X1     | 1  | 180154834 | 180204030 | 1  |
| ENSG00000156675 | -2.9129198   | 5.532052676  | 3.25E-05   | 0.00233695 | RAB11F1P1 | 8  | 37858618  | 37899467  | -1 |
| ENSG00000117280 | -1.50030096  | 5.13828877   | 2.86E-05   | 0.00218032 | RAB29     | 2  | 205767986 | 205775460 | -1 |
| ENSG00000172007 | -1.10310221  | 4.990111023  | 9.46E-05   | 0.00491265 | RAB33B    | 4  | 139453232 | 139476609 | 1  |
| ENSG00000075785 | 1.388901187  | 6.073198611  | 4.98E-05   | 0.00314168 | RAB7A     | 3  | 128726122 | 128814796 | 1  |
| ENSG00000103710 | -6.41280922  | -0.31635466  | 0.00020812 | 0.00837564 | RASL12    | 15 | 65053337  | 65076690  | -1 |
| ENSG00000068028 | -1.51489044  | 4.322005324  | 4.85E-06   | 0.00062005 | RASSF1    | 3  | 50329782  | 50340980  | -1 |
| ENSG00000076067 | 1.745224259  | 4.314372802  | 0.00013507 | 0.00627224 | RBMS2     | 12 | 56521929  | 56596196  | 1  |
| ENSG00000173653 | -1.68581841  | 2.937442952  | 6.93E-05   | 0.00394914 | RCE1      | 11 | 66842835  | 66846546  | 1  |
| ENSG00000054967 | -2.33348769  | 2.982079757  | 0.00017624 | 0.00743751 | RELT      | 11 | 73376264  | 73397474  | 1  |
| ENSG00000182175 | -2.321520388 | 6.052036305  | 0.00018883 | 0.00779372 | RGMA      | 15 | 93035273  | 93089204  | -1 |
| ENSG00000153165 | -9.10640659  | 0.000417695  | 6.20E-08   | 2.39E-05   | RGPD3     | 2  | 106391290 | 106468376 | -1 |
| ENSG00000183054 | -10.03785    | -1.410500157 | 1.97E-06   | 0.00032139 | RGPD6     | 2  | 110513812 | 110577185 | -1 |
| ENSG00000116741 | -3.14593582  | 4.390126315  | 1.57E-05   | 0.00139945 | RGS2      | 1  | 192809039 | 192812283 | 1  |
| ENSG00000117152 | -5.38253684  | 3.791370948  | 3.03E-05   | 0.00227447 | RGSA      | 1  | 163068775 | 163076802 | 1  |
| ENSG00000124784 | -1.70186304  | 4.736193495  | 9.96E-05   | 0.00509994 | RIOK1     | 6  | 7389496   | 7418037   | 1  |
| ENSG00000125352 | -1.57393612  | 2.883876983  | 6.62E-05   | 0.00381969 | RNF113A   | X  | 119870475 | 119871827 | -1 |
| ENSG00000188050 | -3.48180195  | -0.246135988 | 0.0002465  | 0.00943333 | RNF133    | 7  | 122697712 | 122699156 | -1 |
| ENSG00000163481 | -1.44327135  | 4.781325103  | 1.06E-05   | 0.0010761  | RNF25     | 2  | 218663864 | 218672411 | -1 |
| ENSG00000181852 | -1.42771503  | 6.452198456  | 9.76E-06   | 0.00102922 | RNF41     | 12 | 56202175  | 56221933  | -1 |
| ENSG00000135119 | 1.480423512  | 5.034988052  | 8.91E-05   | 0.00472787 | RNFT2     | 12 | 116738178 | 116853631 | 1  |
| ENSG00000100316 | -1.15545963  | 9.783016765  | 6.09E-05   | 0.00359638 | RPL3      | 22 | 39312882  | 39320389  | -1 |
| ENSG00000122406 | -1.04125953  | 9.173072626  | 5.36E-05   | 0.00329556 | RPL5      | 1  | 92832025  | 92841924  | 1  |
| ENSG00000137818 | 2.439547719  | 7.383458521  | 0.00017095 | 0.00725355 | RPLP1     | 15 | 69452784  | 69456194  | 1  |
| ENSG00000163902 | -1.00062239  | 8.529793392  | 0.00019622 | 0.00797685 | RPN1      | 3  | 128619970 | 128681075 | -1 |
| ENSG00000163125 | 2.116045925  | 4.893564883  | 2.53E-05   | 0.00201141 | RPRD2     | 1  | 150363091 | 150476566 | 1  |
| ENSG00000142534 | -1.02053995  | 9.260388923  | 0.00011093 | 0.00548981 | RPS11     | 19 | 49496365  | 49499689  | 1  |
| ENSG00000185088 | -1.40228701  | 7.05629005   | 9.10E-06   | 0.00098343 | RPS27L    | 15 | 63125872  | 63158021  | -1 |
| ENSG00000149273 | -1.2978532   | 8.460387391  | 2.98E-05   | 0.00224972 | RPS3      | 11 | 75399486  | 75422280  | 1  |
| ENSG00000166133 | -1.49096142  | 3.704663724  | 0.00014169 | 0.00649096 | RPUSD2    | 15 | 40569300  | 40574943  | 1  |
| ENSG00000048392 | -1.47649267  | 7.668626701  | 3.94E-06   | 0.00053256 | RRM2B     | 8  | 102204502 | 102239118 | -1 |
| ENSG00000198838 | 2.57957853   | 5.770734907  | 5.69E-05   | 0.00340453 | RYR3      | 15 | 33310945  | 33866121  | 1  |
| ENSG00000170989 | -1.6713098   | 6.693864173  | 0.00021477 | 0.00854065 | S1PR1     | 1  | 101236888 | 101241518 | 1  |
| ENSG00000165821 | 2.168438811  | 6.494602644  | 1.29E-05   | 0.00124017 | SALL2     | 14 | 21521081  | 21537216  | -1 |
| ENSG00000136715 | 1.654025165  | 4.118319048  | 0.00012571 | 0.00599332 | SAP130    | 2  | 127941217 | 128028120 | -1 |
| ENSG00000168077 | 1.809650698  | 6.458527773  | 2.32E-05   | 0.00187929 | SCARA3    | 8  | 27633868  | 27676776  | 1  |
| ENSG00000168079 | -10.0789129  | -1.375023118 | 5.06E-06   | 0.00063743 | SCARA5    | 8  | 27869882  | 27992727  | -1 |
| ENSG00000162512 | 1.995879812  | 8.029561004  | 5.22E-05   | 0.00324328 | SDC3      | 1  | 30869467  | 30908761  | -1 |
| ENSG00000073578 | -0.99654748  | 6.432324065  | 0.00023001 | 0.00897441 | SDHA      | 5  | 218241    | 256700    | 1  |
| ENSG00000100934 | -1.50803418  | 7.460183546  | 2.22E-06   | 0.00035389 | SEC23A    | 14 | 39031919  | 39109646  | -1 |
| ENSG00000075223 | -2.87487658  | 4.236890905  | 3.72E-05   | 0.00256199 | SEMA3C    | 7  | 80742538  | 80922359  | -1 |
| ENSG00000010319 | -6.4009627   | -0.499987153 | 1.25E-07   | 4.21E-05   | SEMA3G    | 3  | 52433053  | 52445085  | -1 |
| ENSG00000119231 | -1.16216911  | 6.75523747   | 9.90E-05   | 0.00508219 | SENP5     | 3  | 196867856 | 196934714 | 1  |
| ENSG00000106366 | -4.01516667  | 4.332359459  | 0.00015023 | 0.00673672 | SERPINE1  | 7  | 101127089 | 101139266 | 1  |
| ENSG00000149131 | 2.363434827  | 4.439053952  | 7.80E-05   | 0.00434508 | SERPING1  | 11 | 57597387  | 57614853  | 1  |
| ENSG00000197019 | -4.02162425  | 4.647554378  | 3.23E-09   | 2.81E-06   | SERTAD1   | 19 | 40421592  | 40426025  | -1 |
| ENSG00000152217 | 2.381554772  | 5.83263294   | 3.12E-05   | 0.00230997 | SETBP1    | 18 | 44680173  | 45068510  | 1  |
| ENSG00000230667 | -6.69721703  | 0.213961652  | 3.62E-08   | 1.66E-05   | SETSIP    | 1  | 92074533  | 92075441  | -1 |
| ENSG00000143368 | 1.955980053  | 3.715871414  | 3.97E-05   | 0.00265504 | SF3B4     | 1  | 149923317 | 149928344 | -1 |
| ENSG00000118515 | -4.27985649  | 3.238568702  | 5.57E-05   | 0.00337068 | SGK1      | 6  | 134169246 | 134318112 | -1 |
| ENSG00000164023 | -2.95875624  | 4.976230492  | 3.59E-05   | 0.00250827 | SGMS2     | 4  | 107824563 | 107915047 | 1  |
| ENSG00000172985 | 2.064991897  | 3.380765727  | 0.00012662 | 0.00601975 | SH3RF3    | 2  | 109129348 | 109504632 | 1  |
| ENSG00000197555 | 1.266960262  | 6.89859982   | 5.59E-05   | 0.00337447 | SIPA1L1   | 14 | 71320449  | 71741229  | 1  |
| ENSG00000165480 | 2.346185081  | 2.911943328  | 0.00016396 | 0.007081   | SKA3      | 13 | 21153595  | 21176602  | -1 |
| ENSG00000141526 | -6.42971842  | 0.509690668  | 3.89E-05   | 0.00263676 | SLC16A3   | 17 | 82228397  | 82261129  | 1  |
| ENSG00000119899 | -1.534484    | 4.882943162  | 0.00020641 | 0.00834132 | SLC17A5   | 6  | 73593379  | 73654155  | -1 |
| ENSG00000162383 | -10.7187525  | -1.259442171 | 5.06E-07   | 0.00011611 | SLC1A7    | 1  | 53087179  | 53142632  | -1 |
| ENSG00000089057 | 1.271938719  | 5.853034296  | 0.00020825 | 0.00837564 | SLC23A2   | 20 | 4852356   | 5010293   | -1 |
| ENSG00000164933 | -2.24703441  | 4.504771934  | 7.04E-05   | 0.00400219 | SLC25A32  | 8  | 103398635 | 103415189 | -1 |

|                  |              |              |            |            |           |    |           |           |    |
|------------------|--------------|--------------|------------|------------|-----------|----|-----------|-----------|----|
| ENSG00000170385  | -2.0533362   | 7.002632531  | 2.88E-06   | 0.00042189 | SLC30A1   | 1  | 211571568 | 211578742 | -1 |
| ENSG00000176087  | 1.510628784  | 4.328388738  | 5.51E-05   | 0.00333982 | SLC35A4   | 5  | 140564456 | 140569103 | 1  |
| ENSG00000157593  | -1.33131051  | 5.940178556  | 4.56E-05   | 0.0029329  | SLC35B2   | 6  | 44254096  | 44257890  | -1 |
| ENSG00000157800  | -1.25097845  | 6.406915095  | 0.00011715 | 0.00572981 | SLC37A3   | 7  | 140293693 | 140404433 | -1 |
| ENSG00000104635  | -1.70120088  | 6.23792486   | 5.45E-06   | 0.00067553 | SLC39A14  | 8  | 22367249  | 22434129  | 1  |
| ENSG00000168003  | -1.54556912  | 7.374443281  | 4.65E-05   | 0.0029706  | SLC3A2    | 11 | 62856102  | 62888875  | 1  |
| ENSG00000131389  | -2.34271896  | 4.40121635   | 1.44E-06   | 0.00024792 | SLC6A6    | 3  | 14402576  | 14489349  | 1  |
| ENSG00000170365  | 2.090074356  | 5.464078598  | 2.27E-05   | 0.00185339 | SMAD1     | 4  | 145481194 | 145558079 | 1  |
| ENSG00000101665  | -2.14737991  | 2.768727841  | 2.86E-05   | 0.00218032 | SMAD7     | 18 | 48919853  | 48950711  | -1 |
| ENSG00000072501  | 1.363443298  | 6.780377388  | 2.76E-05   | 0.00214034 | SMC1A     | X  | 53374149  | 53422728  | -1 |
| ENSG00000167447  | -1.07067633  | 5.704574779  | 0.00018275 | 0.0076587  | SMG8      | 17 | 59209400  | 59215247  | 1  |
| ENSG00000256235  | -1.77033499  | 4.003651885  | 1.48E-05   | 0.00133952 | SMIM3     | 5  | 150777946 | 150796734 | 1  |
| ENSG00000077312  | 1.671741528  | 4.165105743  | 9.08E-05   | 0.00478764 | SNRPA     | 19 | 40750637  | 40765389  | 1  |
| ENSG00000171150  | -1.14013317  | 5.791052316  | 0.00024554 | 0.00941805 | SOCS5     | 2  | 46698952  | 46763129  | 1  |
| ENSG00000177732  | 2.206978072  | 3.657749776  | 4.23E-05   | 0.00277416 | SOX12     | 20 | 325401    | 330224    | 1  |
| ENSG00000134532  | 1.948017089  | 6.351748515  | 0.00023641 | 0.00916105 | SOX5      | 12 | 23529500  | 23951032  | -1 |
| ENSG00000135899  | 2.765602517  | 1.420635123  | 2.13E-05   | 0.00176029 | SP110     | 2  | 230167293 | 230225729 | -1 |
| ENSG00000158792  | -3.34652672  | 3.532737754  | 9.19E-08   | 3.25E-05   | SPATA2L   | 16 | 89696343  | 89701705  | -1 |
| ENSG00000152253  | 2.297568506  | 1.261890104  | 0.00019547 | 0.00795576 | SPC25     | 2  | 168834132 | 168913371 | -1 |
| ENSG00000072195  | 1.319487693  | 5.056220556  | 0.00016239 | 0.00703093 | SPEG      | 2  | 219434846 | 219498287 | 1  |
| ENSG00000176170  | -4.9808298   | 3.255663801  | 1.72E-07   | 5.41E-05   | SPHK1     | 17 | 76376584  | 76387860  | 1  |
| ENSG00000063176  | 1.566165183  | 3.478851582  | 1.37E-05   | 0.00129343 | SPHK2     | 19 | 48619291  | 48630717  | 1  |
| ENSG00000166145  | -6.20168795  | -1.498426022 | 0.00016936 | 0.00721021 | SPINT1    | 15 | 40844018  | 40858207  | 1  |
| ENSG00000203772  | 2.330677961  | 2.912491759  | 7.64E-06   | 0.00087131 | SPRN      | 10 | 133420666 | 133424572 | -1 |
| ENSG00000179119  | -1.6023308   | 6.326291754  | 5.77E-05   | 0.00344157 | SPTY2D1   | 11 | 18606401  | 18634791  | -1 |
| ENSG00000196935  | 2.267223361  | 5.057415562  | 8.22E-06   | 0.00092659 | SRGAP1    | 12 | 63844293  | 64162221  | 1  |
| ENSG00000101638  | 2.825870215  | 3.008765149  | 6.47E-05   | 0.00374988 | ST8SIA5   | 18 | 46667821  | 46759257  | -1 |
| ENSG00000138378  | -6.03500083  | 1.713545108  | 3.57E-05   | 0.00250557 | STAT4     | 2  | 191029576 | 191151596 | -1 |
| ENSG00000159167  | -5.31605663  | 5.269528412  | 8.70E-10   | 1.06E-06   | STC1      | 8  | 23841915  | 23854807  | -1 |
| ENSG00000164543  | -1.87736919  | 5.390200924  | 9.21E-05   | 0.00484901 | STK17A    | 7  | 43582758  | 43626786  | 1  |
| ENSG00000165416  | 1.093176984  | 7.298816364  | 6.38E-05   | 0.00372571 | SUGT1     | 13 | 52652709  | 52700909  | 1  |
| ENSG00000078269  | -2.53142334  | 3.756377909  | 0.00024689 | 0.00943775 | SYNJ2     | 6  | 157981887 | 158099176 | 1  |
| ENSG00000157625  | 1.142482562  | 4.981406958  | 0.0001389  | 0.0064022  | TAB3      | X  | 30827442  | 30975084  | -1 |
| ENSG00000120948  | 1.486265975  | 7.210814171  | 0.00013274 | 0.00619774 | TARDBP    | 1  | 11012344  | 11026420  | 1  |
| ENSG00000113407  | -1.38721761  | 7.677930352  | 1.37E-05   | 0.00129343 | TARS      | 5  | 33440696  | 33469539  | 1  |
| ENSG00000212127  | -6.21192098  | -0.760508886 | 9.35E-06   | 0.00099787 | TAS2R14   | 12 | 10937406  | 11171573  | -1 |
| ENSG00000104946  | 2.040296642  | 2.906725637  | 0.00014395 | 0.00559049 | TBC1D17   | 19 | 49877425  | 49888749  | 1  |
| ENSG00000106638  | -1.3392945   | 5.037975489  | 0.00012458 | 0.00598008 | TBL2      | 7  | 73568932  | 73578791  | -1 |
| ENSG00000109927  | 2.072255178  | 2.007606753  | 0.00010296 | 0.00523965 | TECTA     | 11 | 121101173 | 121191493 | 1  |
| ENSG00000162851  | -1.27426313  | 3.982816665  | 0.00010925 | 0.00542955 | TFB2M     | 1  | 246540560 | 246566324 | -1 |
| ENSG00000105825  | -2.19192121  | 10.45951111  | 5.51E-05   | 0.00339982 | TFPI2     | 7  | 93885397  | 93890991  | -1 |
| ENSG00000184436  | -1.84274559  | 4.252633059  | 3.94E-05   | 0.00265504 | THAP7     | 22 | 20999104  | 21002196  | -1 |
| ENSG00000137801  | -3.63572423  | 8.520912674  | 1.45E-06   | 0.00024792 | THBS1     | 15 | 39581079  | 39599466  | 1  |
| ENSG00000140534  | 2.559934869  | 2.64336246   | 1.23E-05   | 0.00119877 | TICRR     | 15 | 89575482  | 89631056  | 1  |
| ENSG00000171914  | 1.830767639  | 5.76810808   | 0.00012017 | 0.0058525  | TLN2      | 15 | 62390526  | 62844631  | 1  |
| ENSG00000136869  | -3.0519208   | 5.487077242  | 5.34E-05   | 0.00329555 | TLR4      | 9  | 117704332 | 117716871 | 1  |
| ENSG00000086598  | -1.02024627  | 8.221307532  | 0.00014131 | 0.0064822  | TMED2     | 12 | 123584531 | 123598577 | 1  |
| ENSG00000075568  | 1.499528882  | 5.32154546   | 6.52E-05   | 0.00377216 | TMEM131   | 2  | 97756333  | 97995891  | -1 |
| ENSG00000164112  | -3.03636617  | 1.476920812  | 0.00012318 | 0.00539952 | TMEM155   | 4  | 121758933 | 121765427 | -1 |
| ENSG00000168701  | -1.32412145  | 4.394306314  | 0.00019926 | 0.00808118 | TMEM208   | 16 | 67227103  | 67229278  | 1  |
| ENSG00000072954  | -2.04231443  | 3.448338199  | 3.14E-05   | 0.0023122  | TMEM38A   | 19 | 16661127  | 16690029  | 1  |
| ENSG00000120889  | -1.49595302  | 6.394080942  | 8.22E-05   | 0.00448861 | TNFRSF10B | 8  | 23020133  | 23069179  | -1 |
| ENSG000000006327 | -5.95615589  | 6.084876982  | 5.03E-09   | 3.80E-06   | TNFRSF12A | 16 | 3018445   | 3022383   | 1  |
| ENSG000000000005 | -6.1174929   | 1.706510637  | 7.81E-05   | 0.00434593 | TNMD      | X  | 100584802 | 100599885 | 1  |
| ENSG00000159173  | -7.15970613  | -0.769397837 | 8.28E-06   | 0.00092922 | TNNI1     | 1  | 201403768 | 201429866 | -1 |
| ENSG00000182095  | 1.795599203  | 5.026765717  | 1.62E-05   | 0.00142605 | TNRC18    | 7  | 5306790   | 5425414   | -1 |
| ENSG00000100354  | 1.2931992399 | 7.530498879  | 0.00021955 | 0.00863775 | TNRC6B    | 22 | 40044817  | 40335808  | 1  |
| ENSG00000132773  | -1.9110782   | 3.528197309  | 0.00016166 | 0.00700852 | TOE1      | 1  | 45339670  | 45343975  | 1  |
| ENSG00000136816  | -1.27341214  | 5.003982872  | 1.59E-05   | 0.0014106  | TOR1B     | 9  | 129803153 | 129811281 | 1  |
| ENSG00000101255  | -2.54310345  | 4.408619413  | 5.79E-06   | 0.00070264 | TRIB3     | 20 | 362835    | 397559    | 1  |
| ENSG00000173113  | -1.26575335  | 6.189536868  | 2.56E-05   | 0.00202286 | TRMT112   | 11 | 64316460  | 64318084  | -1 |
| ENSG00000100154  | 1.355509773  | 5.800218427  | 0.00016326 | 0.00705988 | TTC28     | 22 | 27978014  | 28679865  | -1 |
| ENSG00000117143  | -1.49017031  | 5.498146549  | 8.80E-06   | 0.0009731  | UAP1      | 1  | 162561506 | 162599842 | 1  |
| ENSG00000150991  | -1.15777505  | 10.12023517  | 3.81E-05   | 0.00260886 | UBC       | 12 | 124911604 | 124917368 | -1 |
| ENSG00000078967  | 1.774354119  | 3.997427392  | 0.00015369 | 0.00683759 | UBE2D4    | 7  | 43926438  | 43956136  | 1  |
| ENSG00000130725  | -1.71466681  | 5.015563946  | 0.00011127 | 0.00548981 | UBE2M     | 19 | 58555712  | 58558960  | -1 |
| ENSG00000244687  | 1.988983693  | 5.487930261  | 1.15E-05   | 0.00114021 | UBE2V1    | 20 | 50081124  | 50115959  | -1 |
| ENSG00000130939  | 1.313660702  | 5.370765772  | 0.00020338 | 0.00822868 | UBE4B     | 1  | 10032832  | 10181239  | 1  |
| ENSG00000164332  | 1.292362646  | 5.01540675   | 0.00021613 | 0.00854065 | UBLCP1    | 5  | 159263081 | 159286040 | 1  |
| ENSG00000059145  | 1.416256239  | 3.550078908  | 0.00018595 | 0.00774313 | UNKL      | 16 | 1363205   | 1414751   | -1 |
| ENSG00000147679  | -1.37394062  | 5.113142571  | 2.38E-05   | 0.00191928 | UTP23     | 8  | 116766503 | 116849463 | 1  |
| ENSG00000162738  | 1.802010954  | 6.239615719  | 0.00015558 | 0.00688199 | VANGL2    | 1  | 160400586 | 160428678 | 1  |
| ENSG00000170162  | -8.96440839  | -1.179536984 | 4.13E-06   | 0.00054941 | VGLL2     | 6  | 117265558 | 117273565 | 1  |
| ENSG00000131871  | -1.18818036  | 5.976787901  | 0.00018723 | 0.00775073 | VIMP      | 15 | 101270817 | 101277500 | -1 |
| ENSG00000132549  | 1.429269267  | 7.079373882  | 0.0001055  | 0.00529771 | VPS13B    | 8  | 99013266  | 99877580  | 1  |
| ENSG00000134258  | -3.8988538   | -0.121560742 | 0.00011095 | 0.00548981 | VTCN1     | 1  | 117143587 | 117210960 | -1 |
| ENSG00000084463  | 1.821114065  | 5.578693239  | 6.00E-06   | 0.00071261 | WBP11     | 12 | 14784579  | 14803540  | -1 |
| ENSG00000139668  | 1.067596885  | 6.280012005  | 0.00023148 | 0.00901086 | WDFY2     | 13 | 51584455  | 51767707  | 1  |
| ENSG00000163625  | 1.216410991  | 8.14717875   | 0.00025966 | 0.0097626  | WDFY3     | 4  | 84669610  | 84966391  | -1 |
| ENSG00000130733  | -1.56489513  | 4.951795849  | 1.92E-05   | 0.00162926 | YIPF2     | 19 | 10922185  | 10928681  | -1 |
| ENSG00000108953  | 1.820987461  | 7.459818873  | 1.40E-05   | 0.00129343 | YWHAE     | 17 | 1344272   | 1400378   | -1 |

|                 |             |             |            |            |         |    |           |           |    |
|-----------------|-------------|-------------|------------|------------|---------|----|-----------|-----------|----|
| ENSG00000132846 | 2.752236654 | 1.894153689 | 0.00012451 | 0.00598008 | ZBED3   | 5  | 77072072  | 77087323  | -1 |
| ENSG00000181722 | 1.232954823 | 5.790657588 | 0.00012497 | 0.00598322 | ZBTB20  | 3  | 114338094 | 115147271 | -1 |
| ENSG00000168826 | -1.55268941 | 3.201014875 | 0.00016915 | 0.00721021 | ZBTB49  | 4  | 4290251   | 4321786   | 1  |
| ENSG00000178951 | 2.073137208 | 2.658497165 | 1.68E-05   | 0.00146565 | ZBTB7A  | 19 | 4044364   | 4066945   | -1 |
| ENSG00000123200 | 1.828441163 | 6.863099064 | 0.00014873 | 0.00671369 | ZC3H13  | 13 | 45954465  | 46052759  | -1 |
| ENSG00000169946 | 2.224387019 | 2.53617114  | 1.86E-05   | 0.00159465 | ZFPM2   | 8  | 104590733 | 105804532 | 1  |
| ENSG00000072121 | 1.423537875 | 6.087016948 | 5.17E-06   | 0.00064588 | ZFYVE26 | 14 | 67727374  | 67816590  | -1 |
| ENSG00000155256 | -2.2741084  | 5.435230079 | 7.41E-09   | 4.94E-06   | ZFYVE27 | 10 | 97737121  | 97760907  | 1  |
| ENSG00000160094 | 1.563808346 | 3.903498028 | 3.27E-05   | 0.00233913 | ZNF362  | 1  | 33256545  | 33300719  | 1  |
| ENSG00000126746 | 1.433818158 | 4.84057562  | 0.00013374 | 0.00622737 | ZNF384  | 12 | 6666477   | 6689572   | -1 |
| ENSG00000204604 | -1.56011156 | 4.832209405 | 6.66E-05   | 0.00381969 | ZNF468  | 19 | 52838008  | 52857649  | -1 |
| ENSG00000074657 | 1.280747204 | 7.461574253 | 5.13E-05   | 0.00321396 | ZNF532  | 18 | 58862600  | 58986480  | 1  |
| ENSG00000196357 | -1.44497179 | 3.179208723 | 6.37E-05   | 0.00372571 | ZNF565  | 19 | 36182060  | 36246257  | -1 |
| ENSG00000164684 | 1.372474467 | 5.651904787 | 3.68E-05   | 0.00254744 | ZNF704  | 8  | 80628451  | 80874781  | -1 |
| ENSG00000151612 | 1.718010616 | 4.907036524 | 1.35E-05   | 0.00128518 | ZNF827  | 4  | 145757627 | 145938635 | -1 |
| ENSG00000132801 | -1.50858037 | 2.965491009 | 0.00010488 | 0.00529669 | ZSWIM3  | 20 | 45857617  | 45879122  | 1  |

Significantly altered genes between control and THC (chronic) treated iPSC-derived neurons.

| Ensembl_gene_id | logFC       | logCPM       | PValue      | FDR        | hgnc_symbol   | chromosome | start position | end position | strand |
|-----------------|-------------|--------------|-------------|------------|---------------|------------|----------------|--------------|--------|
| ENSG00000160179 | -2.2488807  | 5.997429796  | 6.64E-06    | 0.00059421 | ABCG1         | 21         | 42199689       | 42297244     | 1      |
| ENSG00000136379 | 1.655839123 | 3.396538392  | 0.00034581  | 0.00935339 | ABHD17C       | 15         | 80679684       | 80755621     | 1      |
| ENSG00000100439 | 2.272354989 | 5.135091444  | 0.00022195  | 0.00689294 | ABHD4         | 14         | 22598237       | 22613215     | 1      |
| ENSG00000146109 | -1.34164144 | 1.34164144   | 4.517272084 | 8.13E-05   | ABT1          | 6          | 26596952       | 26600744     | 1      |
| ENSG0000014257  | -7.54107618 | -1.54540333  | 8.24E-05    | 0.00353867 | ACPP          | 3          | 132317367      | 132368298    | 1      |
| ENSG00000107796 | -2.32771356 | 8.970239561  | 8.62E-05    | 0.00361584 | ACTA2         | 10         | 88935074       | 88991390     | -1     |
| ENSG00000154734 | -3.69236107 | 5.347865131  | 5.04E-05    | 0.00249017 | ADAMTS1       | 21         | 26835747       | 26845409     | -1     |
| ENSG00000129467 | -6.79335852 | -1.571050763 | 2.58E-05    | 0.00156555 | ADCY4         | 14         | 24318349       | 24335093     | -1     |
| ENSG00000078549 | 1.831775448 | 6.378219798  | 0.00021163  | 0.0066834  | ADCYAP1R1     | 7          | 31052461       | 31111479     | 1      |
| ENSG00000116863 | -1.44541959 | 5.252789003  | 2.60E-05    | 0.00156997 | ADPRHL2       | 1          | 36088875       | 36093932     | 1      |
| ENSG00000181026 | -1.85272041 | 6.132771524  | 0.00035683  | 0.00955464 | AEN           | 15         | 88621296       | 88632282     | 1      |
| ENSG00000144218 | 1.406570121 | 7.102603747  | 2.81E-05    | 0.00165602 | AFF3          | 2          | 99545419       | 100142739    | -1     |
| ENSG00000092847 | 1.29811499  | 6.834515835  | 9.28E-05    | 0.00382844 | AGO1          | 1          | 35869808       | 35930528     | 1      |
| ENSG00000126705 | 2.674137628 | 3.452013963  | 2.69E-05    | 0.00160412 | AHDC1         | 1          | 27534035       | 27604431     | -1     |
| ENSG00000059573 | -1.30275139 | 6.708504603  | 0.00010632  | 0.00418187 | ALDH18A1      | 10         | 95605929       | 95656706     | -1     |
| ENSG00000184254 | -10.0747854 | 0.707051955  | 2.31E-06    | 0.00027955 | ALDH1A3       | 15         | 100877714      | 100916626    | 1      |
| ENSG00000178038 | -2.98615034 | 0.279192905  | 0.00037562  | 0.00988392 | ALS2CL        | 3          | 46668997       | 46693704     | -1     |
| ENSG00000123505 | -1.62846609 | 7.522791073  | 1.68E-05    | 0.00117212 | AMD1          | 6          | 110814621      | 110895713    | 1      |
| ENSG00000136938 | 2.096029909 | 3.511917446  | 5.41E-05    | 0.0026139  | ANP3B         | 9          | 97983361       | 98015943     | 1      |
| ENSG00000169604 | 2.471110589 | 6.248975281  | 1.03E-05    | 0.00081374 | ANTXR1        | 2          | 69013178       | 69249327     | 1      |
| ENSG00000264230 | -4.96221986 | -0.866766224 | 4.91E-06    | 0.00047938 | ANXA8L1       | 10         | 46375627       | 46537864     | 1      |
| ENSG00000183020 | 1.32958793  | 4.823772984  | 0.00027852  | 0.00809396 | AP2A2         | 11         | 924894         | 1012245      | 1      |
| ENSG00000006125 | 1.524498942 | 8.331576658  | 2.01E-05    | 0.00133381 | AP2B1         | 17         | 35578046       | 35726409     | 1      |
| ENSG00000134982 | 1.44890066  | 9.264868086  | 6.63E-05    | 0.00300712 | APC           | 5          | 112707498      | 112846239    | 1      |
| ENSG00000244509 | 2.299221954 | 2.784880164  | 7.71E-06    | 0.00065784 | APOBEC3C      | 22         | 39014083       | 39020352     | 1      |
| ENSG00000109321 | -7.41665463 | -1.655630195 | 0.00017624  | 0.00595057 | AREG          | 4          | 74445134       | 74455009     | 1      |
| ENSG00000168374 | -1.7268289  | 7.748531487  | 3.02E-06    | 0.00034214 | ARF4          | 3          | 57571363       | 57598220     | -1     |
| ENSG00000241484 | -6.47307397 | -0.486394105 | 0.00020647  | 0.00656355 | ARHGAP8       | 22         | 44752558       | 44862788     | 1      |
| ENSG00000175906 | -2.39171727 | 1.856503946  | 0.00014725  | 0.00519565 | ARL4D         | 17         | 43398959       | 43401137     | 1      |
| ENSG00000242498 | 1.38739665  | 5.806499602  | 9.68E-05    | 0.00392908 | ARPPIN        | 15         | 89895006       | 89912956     | -1     |
| ENSG00000180801 | -2.16413294 | 5.092245047  | 4.44E-05    | 0.00229152 | ARSI          | 4          | 113900284      | 113979727    | -1     |
| ENSG00000153317 | 1.851113061 | 4.890277877  | 7.75E-06    | 0.00065822 | ASAP1         | 8          | 130052104      | 130443660    | -1     |
| ENSG00000110881 | 1.824164139 | 4.372228159  | 0.00011024  | 0.0043063  | ASIC1         | 12         | 50057548       | 50083611     | 1      |
| ENSG00000162772 | -2.84208178 | 4.100110753  | 6.36E-05    | 0.00292456 | ATF3          | 1          | 212565334      | 212620777    | 1      |
| ENSG00000128272 | -1.19860872 | 8.583576392  | 0.00025585  | 0.00766538 | ATF4          | 22         | 39519695       | 39522685     | 1      |
| ENSG00000170653 | 2.140828958 | 3.284127878  | 2.58E-05    | 0.00156669 | ATF7          | 12         | 53507856       | 53626410     | -1     |
| ENSG00000171681 | 2.057884455 | 7.824670977  | 1.76E-05    | 0.00121164 | ATF7IP        | 12         | 14365632       | 14502935     | 1      |
| ENSG00000123395 | -1.5802088  | 5.134100158  | 7.76E-06    | 0.00065822 | ATG101        | 12         | 52069246       | 52077494     | 1      |
| ENSG00000058668 | 1.987427352 | 7.35084324   | 0.00011408  | 0.0043906  | ATP2B4        | 1          | 203626561      | 203744081    | 1      |
| ENSG00000117410 | -1.48503221 | 6.234005492  | 2.98E-05    | 0.00172833 | ATP6V0B       | 1          | 43974487       | 43978295     | 1      |
| ENSG00000143515 | -1.44448052 | 5.549407885  | 0.00033088  | 0.00909445 | ATP8B2        | 1          | 154325553      | 154351307    | 1      |
| ENSG00000183778 | 1.937651181 | 3.808794102  | 1.36E-05    | 0.00099987 | B3GALT5       | 21         | 39556442       | 39673137     | 1      |
| ENSG00000123810 | -1.55697126 | 2.998290229  | 0.00020524  | 0.00656355 | B9D2          | 19         | 41354421       | 41364173     | -1     |
| ENSG00000186318 | 1.490735635 | 5.454826492  | 0.00031382  | 0.00884021 | BACE1         | 11         | 117285207      | 117316259    | -1     |
| ENSG00000266074 | 2.694187674 | 2.275766652  | 5.93E-06    | 0.00054245 | BAHCC1        | 17         | 81395475       | 81466332     | 1      |
| ENSG00000076108 | 1.782338088 | 5.09338512   | 0.00013365  | 0.00484175 | BAZ2A         | 12         | 56595596       | 56636816     | -1     |
| ENSG00000258643 | 2.168683282 | 3.774967539  | 1.10E-05    | 0.00085245 | BCL2L2-PABPN1 | 14         | 23306835       | 23325369     | 1      |
| ENSG00000116128 | 1.56050973  | 3.795118043  | 0.00026333  | 0.00782027 | BCL9          | 19         | 147541412      | 147626216    | 1      |
| ENSG00000168398 | -3.57521721 | -0.029107091 | 0.00031413  | 0.00884182 | BDKRB2        | 14         | 96204679       | 96244166     | 1      |
| ENSG00000176697 | -3.31467252 | 4.716966021  | 1.83E-05    | 0.00124407 | BDNF          | 11         | 27654893       | 27722058     | -1     |
| ENSG00000123095 | 1.457996995 | 5.705394601  | 0.00021977  | 0.00684871 | BHLHE41       | 12         | 26120026       | 26125127     | -1     |
| ENSG00000117475 | -1.28229975 | 5.58007944   | 0.00010631  | 0.00418187 | BLZF1         | 1          | 169367970      | 169396540    | 1      |
| ENSG00000125378 | -3.34299595 | 2.089552973  | 2.33E-05    | 0.0014782  | BMP4          | 14         | 53949736       | 53958761     | -1     |
| ENSG00000169594 | -10.1721964 | 0.718516128  | 4.74E-07    | 8.47E-05   | BNC1          | 15         | 83255903       | 83284716     | -1     |
| ENSG00000163141 | 3.768881052 | 0.306652473  | 0.00023235  | 0.00711822 | BNIPL         | 1          | 151036570      | 151047600    | 1      |
| ENSG00000171634 | 1.35748677  | 7.594654465  | 1.92E-05    | 0.00128428 | BPTF          | 17         | 67825524       | 67984378     | 1      |
| ENSG00000104221 | -1.23660933 | 4.363816977  | 0.00010984  | 0.00429538 | BRF2          | 8          | 37843268       | 37849904     | -1     |
| ENSG00000174744 | -1.81033664 | 4.981349918  | 5.99E-07    | 0.00010108 | BRMS1         | 11         | 66337333       | 66345125     | -1     |
| ENSG00000133243 | 1.258727567 | 5.106078467  | 0.00019839  | 0.00643216 | BTBD2         | 19         | 1985438        | 2034881      | -1     |
| ENSG00000166167 | 1.224106272 | 6.113200555  | 5.71E-05    | 0.00269685 | BTRC          | 10         | 101354033      | 101557321    | 1      |

|                 |             |              |            |            |           |    |           |           |    |
|-----------------|-------------|--------------|------------|------------|-----------|----|-----------|-----------|----|
| ENSG00000137656 | -1.01512615 | 4.729239289  | 0.00019726 | 0.00640267 | BUD13     | 11 | 116748170 | 116772988 | -1 |
| ENSG00000173088 | 3.984967301 | -1.110261662 | 0.0001173  | 0.00447374 | C10orf131 | 10 | 95907603  | 95938723  | 1  |
| ENSG00000103544 | 1.162789761 | 5.988212709  | 0.00015834 | 0.00547319 | C16orf62  | 16 | 19555240  | 19706793  | 1  |
| ENSG00000174109 | -1.35120146 | 3.048732977  | 8.63E-05   | 0.00361584 | C16orf91  | 16 | 1419744   | 1420800   | -1 |
| ENSG00000239887 | 2.183700086 | 3.178660614  | 0.00012595 | 0.00467136 | C1orf226  | 1  | 162366908 | 162386818 | 1  |
| ENSG00000162757 | -1.59012019 | 2.801233188  | 0.00033791 | 0.00920237 | C1orf74   | 1  | 209779208 | 209784559 | -1 |
| ENSG00000184208 | 1.798386351 | 4.617715987  | 1.51E-05   | 0.0010872  | C22orf46  | 22 | 41688939  | 41698136  | 1  |
| ENSG00000178776 | -7.26608997 | -1.581154373 | 4.36E-05   | 0.00227577 | C5orf46   | 5  | 147880726 | 147906538 | -1 |
| ENSG00000203872 | 2.1412555   | 0.82178387   | 0.00032737 | 0.00904929 | C6orf163  | 6  | 87344849  | 87365463  | 1  |
| ENSG00000153790 | 3.016414937 | 2.16531769   | 3.84E-06   | 0.00040873 | C7orf31   | 7  | 25134697  | 25180356  | -1 |
| ENSG00000105605 | 2.10394451  | 3.461360566  | 4.55E-06   | 0.00045567 | CACNG7    | 19 | 53909335  | 53943941  | 1  |
| ENSG00000112186 | 1.443570367 | 5.003458437  | 0.00020361 | 0.00654429 | CAP2      | 6  | 17393216  | 17557792  | 1  |
| ENSG00000132357 | 3.705882864 | -0.560186246 | 0.00021992 | 0.00684871 | CARD6     | 5  | 40841184  | 40860175  | 1  |
| ENSG00000177303 | 1.606226065 | 2.987353758  | 0.00014494 | 0.00514115 | CASKIN2   | 17 | 75500261  | 75515583  | -1 |
| ENSG00000106144 | 2.14699269  | 3.832153993  | 8.99E-06   | 0.00072827 | CASP2     | 7  | 143288215 | 143307696 | 1  |
| ENSG00000067955 | -1.32805732 | 5.674017042  | 3.69E-05   | 0.00198949 | CBFB      | 16 | 67029116  | 67101058  | 1  |
| ENSG00000110395 | 2.200707852 | 6.152916062  | 4.72E-07   | 8.47E-05   | CBL       | 11 | 119206276 | 119308149 | 1  |
| ENSG00000094916 | 1.69813213  | 9.256712441  | 2.09E-06   | 0.00026198 | CBX5      | 12 | 54230940  | 54280133  | -1 |
| ENSG00000183741 | 1.05204044  | 6.841818094  | 0.00023778 | 0.00724759 | CBX6      | 22 | 38861450  | 38872314  | -1 |
| ENSG00000007080 | 1.671902089 | 3.517847885  | 0.00019969 | 0.00645572 | CCDC124   | 17 | 17933016  | 17943991  | 1  |
| ENSG00000177352 | -1.6267426  | 3.608950005  | 0.00017145 | 0.00580251 | CCDC71    | 3  | 49162535  | 49166321  | -1 |
| ENSG00000169515 | -1.7752508  | 5.188046762  | 0.00033133 | 0.00909936 | CCDC8     | 19 | 46410372  | 46413584  | -1 |
| ENSG00000115355 | 1.703006114 | 8.0772405    | 0.00011124 | 0.00432525 | CCDC88A   | 2  | 55287842  | 55419921  | -1 |
| ENSG00000172156 | -11.7585793 | -0.920047342 | 1.80E-05   | 0.00122742 | CCLL1     | 17 | 34285668  | 34288334  | 1  |
| ENSG00000100814 | -1.36131178 | 5.535003948  | 3.68E-05   | 0.00198949 | CCNB1IP1  | 14 | 20311368  | 20333312  | -1 |
| ENSG00000112576 | -2.26738003 | 5.205687999  | 2.46E-05   | 0.0015186  | CCND3     | 6  | 41934933  | 42050357  | -1 |
| ENSG00000085117 | -2.19688893 | 2.220962502  | 9.59E-06   | 0.00076029 | CD82      | 11 | 44564427  | 44620363  | 1  |
| ENSG00000179604 | 1.221759992 | 5.947362343  | 0.00032794 | 0.00905772 | CDC42EP4  | 17 | 73283624  | 73312175  | -1 |
| ENSG00000040731 | 1.971652694 | 3.863466363  | 0.00023433 | 0.00717254 | CDH10     | 5  | 24487100  | 24644978  | -1 |
| ENSG00000124762 | -1.92221738 | 6.758797041  | 8.31E-06   | 0.00068343 | CDKN1A    | 6  | 36676460  | 36687339  | 1  |
| ENSG00000140743 | -2.40841571 | 4.306373817  | 5.21E-06   | 0.00049805 | CDR2      | 16 | 22345936  | 22437165  | -1 |
| ENSG00000113722 | -9.83487112 | -1.491002092 | 1.56E-05   | 0.00110989 | CDX1      | 5  | 150166795 | 150184558 | 1  |
| ENSG00000245848 | -4.83296316 | 1.506866743  | 5.24E-07   | 9.04E-05   | CEBPA     | 19 | 33299934  | 33302564  | -1 |
| ENSG00000153879 | -0.96064838 | 6.771100064  | 0.00033554 | 0.00916312 | CEBPG     | 19 | 33373330  | 33382686  | 1  |
| ENSG00000099954 | 2.176295464 | 4.084354276  | 1.84E-05   | 0.0012492  | CECR2     | 22 | 17359949  | 17558149  | 1  |
| ENSG00000048740 | 1.640528277 | 6.380695923  | 2.83E-05   | 0.00165976 | CELF2     | 10 | 11005321  | 11336675  | 1  |
| ENSG00000223802 | 1.216436796 | 5.634343872  | 1.91E-05   | 0.00128428 | CERS1     | 19 | 18868545  | 18896727  | -1 |
| ENSG00000138135 | -6.0604066  | 0.813848965  | 0.00010848 | 0.00425687 | CH25H     | 10 | 89205629  | 89207314  | -1 |
| ENSG00000198824 | 1.516973596 | 3.295337868  | 0.0002757  | 0.00804697 | CHAMP1    | 13 | 114314513 | 114327328 | 1  |
| ENSG00000171316 | 1.866630203 | 7.136992552  | 4.88E-06   | 0.00047743 | CHD7      | 8  | 60678778  | 60686028  | 1  |
| ENSG00000133048 | 5.272552308 | -0.0855488   | 0.00035968 | 0.00959926 | CHIL3L1   | 1  | 203178931 | 203186749 | -1 |
| ENSG00000174343 | -2.87775374 | 1.863500495  | 0.00026359 | 0.00782132 | CHRNA9    | 4  | 40335329  | 40355217  | 1  |
| ENSG00000213341 | -1.12033245 | 6.146408084  | 0.00031995 | 0.00893885 | CHUK      | 10 | 100188298 | 100229619 | -1 |
| ENSG00000005194 | -1.09662641 | 5.711726512  | 0.00013104 | 0.00480318 | CIAPIN1   | 16 | 57428169  | 57447528  | -1 |
| ENSG00000185043 | -1.23475789 | 5.103367423  | 0.00010313 | 0.00411203 | CIB1      | 15 | 90229975  | 90234047  | -1 |
| ENSG00000175505 | -7.34448615 | 2.750227796  | 4.19E-10   | 5.08E-07   | CLCF1     | 11 | 67364168  | 67374177  | -1 |
| ENSG00000182372 | -2.07458336 | 1.36839799   | 5.36E-05   | 0.00259874 | CLN8      | 8  | 1755778   | 1786572   | 1  |
| ENSG00000205423 | -1.23640128 | 4.977347113  | 2.88E-05   | 0.00168405 | CNEP1R1   | 16 | 50024410  | 50037088  | 1  |
| ENSG00000148842 | 1.729020357 | 4.156324561  | 3.12E-05   | 0.00177299 | CNNM2     | 10 | 102918293 | 103090221 | 1  |
| ENSG00000137161 | 1.412985577 | 4.780228075  | 6.98E-05   | 0.00313033 | CNPY3     | 6  | 42929192  | 42939287  | 1  |
| ENSG00000136152 | -1.11379137 | 6.201055456  | 4.52E-05   | 0.00231993 | COG3      | 13 | 45464898  | 45536630  | 1  |
| ENSG00000133103 | -1.11373845 | 6.200708431  | 0.0001778  | 0.00594036 | COG6      | 13 | 39655627  | 39791665  | 1  |
| ENSG00000204291 | -8.23605336 | 0.70468951   | 5.08E-06   | 0.0004899  | COL15A1   | 9  | 98943179  | 99070792  | 1  |
| ENSG00000101203 | 3.861715439 | -0.636458953 | 0.0001054  | 0.00416982 | COL20A1   | 20 | 63293186  | 63334851  | 1  |
| ENSG00000050767 | -3.87612895 | 1.588654313  | 0.00027506 | 0.0080422  | COL23A1   | 5  | 178237618 | 178590555 | -1 |
| ENSG00000080573 | -4.25570411 | 4.985447071  | 9.50E-05   | 0.00388936 | COL5A3    | 19 | 9959561   | 10010471  | -1 |
| ENSG00000129083 | -1.43827169 | 8.166996322  | 3.73E-06   | 0.00040359 | COPB1     | 11 | 14443440  | 14500027  | -1 |
| ENSG00000115520 | -2.01814186 | 5.625102204  | 1.89E-06   | 0.00023994 | COQ10B    | 2  | 197453423 | 197475308 | 1  |
| ENSG00000103647 | 3.185655418 | 4.136437548  | 7.55E-05   | 0.0033289  | CORO2B    | 15 | 68578969  | 68727806  | 1  |
| ENSG00000112695 | -1.57974166 | 6.297261301  | 2.86E-07   | 5.93E-05   | COX7A2    | 6  | 75237675  | 75250323  | -1 |
| ENSG00000109625 | -5.51041861 | -1.105891179 | 3.06E-05   | 0.00175391 | CPZ       | 4  | 8592660   | 8619759   | 1  |
| ENSG00000143320 | -3.49093592 | 3.074196642  | 0.00012858 | 0.00474405 | CRABP2    | 1  | 156699606 | 156705816 | -1 |
| ENSG00000107175 | -1.32856929 | 6.041241525  | 1.33E-06   | 0.00018217 | CREB3     | 9  | 35732320  | 35737007  | 1  |
| ENSG00000006016 | 3.409764625 | 3.74777982   | 3.20E-07   | 6.59E-05   | CRLF1     | 19 | 18572220  | 18607741  | -1 |
| ENSG00000176390 | -1.17770918 | 3.951531314  | 0.00036191 | 0.00964281 | CRLF3     | 17 | 30769388  | 30824776  | -1 |
| ENSG00000140577 | 1.384047082 | 5.083305626  | 0.00013723 | 0.00495097 | CRTC3     | 15 | 90529925  | 90645345  | 1  |
| ENSG00000062485 | 1.702612611 | 6.211282708  | 0.00029393 | 0.00838344 | CS        | 12 | 56271699  | 56300392  | -1 |
| ENSG00000070770 | 0.952772362 | 5.360707574  | 0.00024846 | 0.00749689 | CSNK2A2   | 16 | 58157907  | 58197920  | -1 |
| ENSG00000146655 | -2.47750402 | 5.184234624  | 9.74E-05   | 0.00394008 | CSRNP1    | 3  | 39141855  | 39154562  | -1 |
| ENSG00000101138 | -1.0351978  | 5.581403569  | 0.00026072 | 0.00776173 | CSTF1     | 20 | 56392371  | 56406369  | 1  |
| ENSG00000175215 | 1.925631497 | 6.584629159  | 1.07E-05   | 0.00083728 | CTDSP2    | 12 | 57819927  | 57846739  | -1 |
| ENSG00000119326 | -1.54589407 | 5.584700961  | 0.00020684 | 0.00656355 | CTNNAL1   | 9  | 108942569 | 109013529 | -1 |
| ENSG00000064601 | 1.295565664 | 5.122813296  | 0.00012424 | 0.00463654 | CTSA      | 20 | 45890144  | 45898820  | 1  |
| ENSG00000103811 | -2.93669207 | 4.08695683   | 0.00025541 | 0.00765902 | CTSH      | 15 | 78921058  | 78949574  | -1 |
| ENSG00000180891 | 1.241830017 | 5.922072132  | 0.00016841 | 0.00574375 | CUEDC1    | 17 | 57861243  | 57955323  | -1 |
| ENSG00000169429 | -4.56816486 | -0.798133808 | 0.00010506 | 0.00416603 | CXCL8     | 4  | 73740506  | 73743716  | 1  |
| ENSG00000166394 | -3.78815863 | -0.358530741 | 3.14E-05   | 0.00177684 | CYB5R2    | 11 | 7665100   | 7677222   | -1 |
| ENSG00000100243 | 1.732839706 | 4.996203604  | 2.57E-05   | 0.00156101 | CYB5R3    | 22 | 42617840  | 42649568  | -1 |
| ENSG00000179091 | -1.18889808 | 5.764053646  | 5.83E-05   | 0.0027395  | CYC1      | 8  | 144095027 | 144097525 | 1  |
| ENSG00000105443 | -1.40429478 | 6.822611283  | 0.00014911 | 0.0052505  | CYTH2     | 19 | 48469032  | 48482314  | 1  |
| ENSG00000129562 | -1.04405883 | 6.859085401  | 4.30E-05   | 0.00225789 | DAD1      | 14 | 22564905  | 22589269  | -1 |



|                 |              |              |            |            |          |    |           |           |    |
|-----------------|--------------|--------------|------------|------------|----------|----|-----------|-----------|----|
| ENSG00000173402 | 1.252972187  | 7.360142027  | 0.00027945 | 0.00809396 | DAG1     | 3  | 49468703  | 49535618  | 1  |
| ENSG00000136485 | 1.783300495  | 6.981807686  | 4.62E-07   | 8.35E-05   | DCAF7    | 17 | 63550461  | 63594266  | 1  |
| ENSG00000167986 | -0.88963267  | 9.066884553  | 0.00031635 | 0.00888198 | DDB1     | 11 | 61299451  | 61342596  | -1 |
| ENSG00000134574 | -1.65818298  | 4.604915871  | 0.00034883 | 0.00941264 | DDB2     | 11 | 47214465  | 47239240  | 1  |
| ENSG00000175197 | -1.88884669  | 4.93268177   | 0.0001319  | 0.00481674 | DDIT3    | 12 | 57516588  | 57520517  | -1 |
| ENSG00000182810 | -2.00260372  | 3.636564636  | 7.94E-05   | 0.0034531  | DDX28    | 16 | 68021274  | 68023442  | -1 |
| ENSG00000184047 | -1.06892797  | 6.472988534  | 0.00027737 | 0.00808862 | DIABLO   | 12 | 122207662 | 122227534 | -1 |
| ENSG00000165023 | -2.0693599   | 7.080962029  | 1.57E-06   | 0.00020351 | DIRAS2   | 9  | 90609832  | 90643104  | -1 |
| ENSG00000107984 | -4.37966848  | 2.352375497  | 0.00028311 | 0.00815571 | DKK1     | 10 | 52314296  | 52318042  | 1  |
| ENSG00000050165 | -1.8320225   | 10.0698347   | 0.00031788 | 0.00890305 | DKK3     | 11 | 11963106  | 12009769  | -1 |
| ENSG00000104936 | 1.507996994  | 4.537357012  | 7.86E-06   | 0.00066351 | DMPK     | 19 | 45769717  | 45782552  | -1 |
| ENSG00000185800 | 1.293505453  | 4.700760747  | 1.92E-05   | 0.00128428 | DMWD     | 19 | 45782947  | 45792802  | -1 |
| ENSG00000103423 | -1.0314708   | 4.508551428  | 0.00037033 | 0.00980479 | DNAJA3   | 16 | 4425805   | 4456775   | 1  |
| ENSG00000135392 | -1.37176842  | 5.496769375  | 7.17E-05   | 0.00318146 | DNAJC14  | 12 | 55820960  | 55830824  | -1 |
| ENSG00000130816 | 1.314915649  | 5.500927292  | 0.00022896 | 0.00703446 | DNMT1    | 19 | 10133345  | 10231286  | -1 |
| ENSG00000135905 | 1.662772549  | 6.67383479   | 6.72E-05   | 0.00303733 | DOCK10   | 2  | 224765090 | 225042445 | -1 |
| ENSG00000118117 | -1.97443057  | 5.487341487  | 4.49E-06   | 0.00045074 | DSE      | 6  | 116254173 | 116444860 | 1  |
| ENSG00000096696 | -3.83694018  | 4.511778525  | 5.72E-05   | 0.0026985  | DSP      | 6  | 7541575   | 7586717   | 1  |
| ENSG00000120129 | -1.75199249  | 4.799963199  | 0.00036409 | 0.00967049 | DUSP1    | 5  | 172768090 | 172771195 | -1 |
| ENSG00000276023 | -2.15017505  | 2.41101814   | 0.00013138 | 0.00480554 | DUSP14   | 17 | 37489831  | 37513501  | 1  |
| ENSG00000105204 | 1.965098681  | 2.187206121  | 0.00034296 | 0.00929843 | DYRK1B   | 19 | 39825350  | 39834201  | -1 |
| ENSG00000145194 | -2.88341848  | 1.353649407  | 4.85E-06   | 0.00047589 | ECE2     | 3  | 184249650 | 184293031 | 1  |
| ENSG00000127129 | -5.98511419  | -1.506669986 | 0.00029917 | 0.00850592 | EDN2     | 1  | 41478775  | 41484673  | -1 |
| ENSG00000159658 | 1.959129944  | 6.850885291  | 0.00021188 | 0.00668418 | EFCAB14  | 1  | 46675159  | 46719064  | -1 |
| ENSG00000169242 | -2.96665073  | 2.492452693  | 3.38E-07   | 6.68E-05   | EFNA1    | 1  | 155127460 | 155134857 | 1  |
| ENSG00000146648 | 2.83801156   | 4.978863659  | 2.84E-07   | 5.92E-05   | EGFR     | 7  | 55019021  | 55256620  | 1  |
| ENSG00000120738 | -3.83286808  | 3.501963466  | 0.00030958 | 0.00874943 | EGR1     | 5  | 138465490 | 138469315 | 1  |
| ENSG00000122877 | -5.34416134  | 2.20986425   | 4.40E-06   | 0.00044571 | EGR2     | 10 | 62811996  | 62919900  | -1 |
| ENSG00000102422 | 2.310205765  | 2.220456855  | 1.39E-05   | 0.00102037 | EHD2     | 19 | 47713343  | 47743134  | 1  |
| ENSG00000103966 | -2.57620117  | 3.530209537  | 7.11E-06   | 0.00062079 | EHD4     | 15 | 41895939  | 41972578  | -1 |
| ENSG00000086232 | 1.017931463  | 6.397108925  | 0.00020689 | 0.00656355 | EIF2AK1  | 7  | 6022244   | 6059230   | -1 |
| ENSG00000172071 | -1.9436669   | 6.1911559    | 3.24E-07   | 6.62E-05   | EIF2AK3  | 2  | 88556741  | 88627576  | -1 |
| ENSG00000125977 | -1.0160362   | 6.769911191  | 0.00032137 | 0.00895366 | EIF2S2   | 20 | 34088298  | 34112332  | 1  |
| ENSG00000149100 | -0.86247186  | 7.4851187    | 0.00022275 | 0.00691168 | EIF3M    | 11 | 32583798  | 32606262  | 1  |
| ENSG00000148730 | 1.647886981  | 6.534875967  | 9.99E-07   | 0.00014515 | EIF4EBP2 | 10 | 70404379  | 70428618  | 1  |
| ENSG00000158417 | 1.871607522  | 5.798555796  | 0.00012208 | 0.00459939 | EIF5B    | 2  | 99337353  | 99401326  | 1  |
| ENSG00000102427 | -1.26802418  | 5.593493109  | 2.62E-05   | 0.00157627 | EIF6     | 20 | 35278907  | 35284985  | -1 |
| ENSG00000132205 | -4.52994656  | 1.30162427   | 6.15E-05   | 0.00286963 | EMILIN2  | 18 | 2847030   | 2915993   | 1  |
| ENSG00000134531 | -3.11829322  | 7.083612685  | 3.81E-07   | 7.36E-05   | EMP1     | 12 | 13196716  | 13219939  | 1  |
| ENSG00000100393 | 1.857477807  | 5.543869087  | 4.72E-05   | 0.00237768 | EP300    | 22 | 41091786  | 41180079  | 1  |
| ENSG00000086289 | 1.356613378  | 5.517862968  | 0.00013085 | 0.00480318 | EPDR1    | 7  | 37683843  | 37951941  | 1  |
| ENSG00000142627 | -3.03340197  | 3.236182694  | 4.16E-05   | 0.00220399 | EPHA2    | 1  | 16124337  | 16156087  | -1 |
| ENSG00000116106 | -1.5605402   | 5.744883926  | 0.00027556 | 0.00804697 | EPHA4    | 2  | 221418027 | 221574202 | -1 |
| ENSG00000143819 | 2.968225323  | 4.879749349  | 3.23E-08   | 1.12E-05   | EPHX1    | 1  | 225810092 | 225845563 | 1  |
| ENSG00000063245 | -2.085472963 | 3.954092936  | 4.17E-06   | 0.00043604 | EPN1     | 19 | 55675226  | 55709858  | 1  |
| ENSG00000082805 | 1.448434866  | 6.625043031  | 2.47E-05   | 0.00152253 | ERC1     | 12 | 990509    | 1495933   | 1  |
| ENSG00000124882 | -8.38365278  | -0.542882529 | 3.00E-05   | 0.00173217 | EREG     | 4  | 74365143  | 74388751  | 1  |
| ENSG00000115363 | -2.96729948  | 4.602192499  | 8.95E-05   | 0.00370678 | EVA1A    | 2  | 75469302  | 75569722  | -1 |
| ENSG00000072840 | 1.4211700294 | 3.878738607  | 9.76E-05   | 0.00394348 | EVC      | 4  | 5711197   | 5814305   | 1  |
| ENSG00000182197 | -2.25541903  | 6.137220128  | 6.65E-06   | 0.00059421 | EXT1     | 8  | 117794490 | 118111853 | -1 |
| ENSG00000168040 | -1.87871252  | 4.572728357  | 5.29E-06   | 0.00050275 | FADD     | 11 | 70203163  | 70207390  | 1  |
| ENSG00000184731 | -2.5780933   | 3.219948094  | 2.42E-05   | 0.00150818 | FAM110C  | 2  | 38814     | 46870     | -1 |
| ENSG00000048828 | 1.341637458  | 6.439713467  | 0.00033205 | 0.0091045  | FAM120A  | 9  | 93451722  | 93566107  | 1  |
| ENSG00000175182 | -1.65215512  | 6.116488376  | 0.00020378 | 0.00654429 | FAM131A  | 3  | 184335926 | 184346275 | 1  |
| ENSG00000189292 | -2.59742193  | 1.192339412  | 3.95E-05   | 0.00210698 | FAM150B  | 2  | 279558    | 288851    | -1 |
| ENSG00000170264 | 1.248733171  | 4.68921851   | 0.00023027 | 0.00706741 | FAM161A  | 2  | 61824854  | 61854143  | -1 |
| ENSG00000163322 | 1.668780392  | 3.882880507  | 1.88E-05   | 0.0012709  | FAM175A  | 4  | 83459517  | 83523348  | -1 |
| ENSG00000135063 | 1.56971899   | 3.59864259   | 0.0001965  | 0.00639108 | FAM189A2 | 9  | 69324572  | 69392455  | 1  |
| ENSG00000164125 | 2.085724503  | 6.376637239  | 5.20E-05   | 0.00254336 | FAM198B  | 4  | 158124474 | 158173318 | -1 |
| ENSG00000185614 | -4.06513554  | -0.569596941 | 0.00018021 | 0.00600313 | FAM212A  | 3  | 49803254  | 49805030  | 1  |
| ENSG00000157870 | 1.828180948  | 1.446245656  | 0.00019916 | 0.00644481 | FAM213B  | 1  | 2586491   | 2591469   | 1  |
| ENSG00000173065 | 2.173739601  | 2.140895862  | 6.61E-05   | 0.00300448 | FAM222B  | 17 | 28755978  | 28855232  | -1 |
| ENSG00000158246 | -2.51804971  | 3.569520685  | 1.00E-05   | 0.00079125 | FAM46B   | 1  | 27005020  | 27012836  | -1 |
| ENSG00000166595 | -1.37147503  | 5.283341797  | 8.32E-06   | 0.00068343 | FAM96B   | 16 | 66932055  | 66934423  | -1 |
| ENSG00000165323 | 1.556848588  | 8.294316082  | 3.95E-05   | 0.00210698 | FAT3     | 11 | 92352096  | 92896470  | 1  |
| ENSG00000105202 | -1.16433733  | 4.907253878  | 0.00014879 | 0.00524485 | FBL      | 19 | 39834458  | 39846414  | -1 |
| ENSG00000156860 | 1.409182198  | 4.127602511  | 0.00013005 | 0.00479326 | FBRS     | 16 | 30658431  | 30670814  | 1  |
| ENSG00000108306 | 1.619627709  | 5.360220378  | 0.00011975 | 0.00455688 | FBXL20   | 17 | 39252644  | 39402523  | -1 |
| ENSG00000118496 | 0.967774178  | 6.870229038  | 0.00017605 | 0.00590529 | FBXO30   | 6  | 145793502 | 145814753 | -1 |
| ENSG00000115641 | -2.66725278  | 5.077366105  | 0.0001401  | 0.00501588 | FHL2     | 2  | 105357712 | 105438513 | -1 |
| ENSG00000151702 | -3.49789455  | 0.373744654  | 2.85E-06   | 0.00032862 | FLI1     | 11 | 128686535 | 128813267 | 1  |
| ENSG00000119686 | -2.22100482  | 3.609216288  | 8.30E-05   | 0.0035472  | FLVCR2   | 14 | 75578617  | 75663214  | 1  |
| ENSG00000170345 | -2.84816151  | 6.131075147  | 1.14E-05   | 0.00087697 | FOS      | 14 | 75278774  | 75282230  | 1  |
| ENSG00000129514 | -8.66736401  | 1.916592621  | 0.00028048 | 0.00810969 | FOXA1    | 14 | 37589984  | 37596059  | -1 |
| ENSG00000164916 | 1.462389067  | 5.357609201  | 0.00011183 | 0.00433357 | FOXP1    | 7  | 4682309   | 4771443   | 1  |
| ENSG00000111206 | 3.144500082  | 3.394718124  | 2.37E-05   | 0.00149947 | FOXP1    | 12 | 2857681   | 2877155   | -1 |
| ENSG00000053254 | 2.017186257  | 5.868857338  | 6.26E-07   | 0.00010366 | FOXP3    | 14 | 89124871  | 89619149  | -1 |
| ENSG00000100350 | 2.297676933  | 3.540113279  | 5.30E-07   | 9.09E-05   | FOXRED2  | 22 | 36487190  | 36507101  | -1 |
| ENSG00000183090 | -8.02528964  | -1.839209675 | 6.67E-05   | 0.00301954 | FREM3    | 4  | 143577302 | 143700675 | -1 |
| ENSG00000167996 | 2.523375602  | 8.432461333  | 4.98E-05   | 0.00247574 | FTH1     | 11 | 61959718  | 61967660  | -1 |
| ENSG00000130383 | -4.34034158  | -0.344833082 | 2.94E-05   | 0.00171298 | FUT5     | 19 | 5865826   | 5870540   | -1 |

|                 |             |              |            |            |           |    |           |           |    |
|-----------------|-------------|--------------|------------|------------|-----------|----|-----------|-----------|----|
| ENSG00000129245 | -1.35389918 | 6.313926083  | 3.85E-06   | 0.00040873 | FXR2      | 17 | 7591230   | 7614871   | -1 |
| ENSG00000137726 | 2.173637151 | 7.0671267    | 0.0002537  | 0.00762111 | FXVD6     | 11 | 117836976 | 117877486 | -1 |
| ENSG00000157240 | -2.59240557 | 4.87220357   | 1.31E-05   | 0.0009715  | FZD1      | 7  | 91264364  | 91271326  | 1  |
| ENSG00000180340 | 2.03535312  | 1.807574729  | 5.33E-06   | 0.00050549 | FZD2      | 17 | 44557459  | 44559570  | 1  |
| ENSG00000141349 | 1.564122947 | 5.011770258  | 6.65E-05   | 0.00301286 | G6PC3     | 17 | 44070735  | 44076344  | 1  |
| ENSG00000099860 | -3.11708965 | 3.517477303  | 7.50E-07   | 0.00011841 | GADD45B   | 19 | 2476122   | 2478259   | 1  |
| ENSG00000185340 | 1.714049432 | 4.228045083  | 0.00016095 | 0.00552921 | GAS2L1    | 22 | 29306582  | 29312785  | 1  |
| ENSG00000107862 | 1.248154865 | 5.934578238  | 0.0001904  | 0.00625063 | GBF1      | 10 | 102245532 | 102382899 | 1  |
| ENSG00000130283 | 3.483955523 | 2.13113686   | 6.17E-10   | 6.75E-07   | GDF1      | 19 | 18868545  | 18896096  | -1 |
| ENSG00000135414 | 1.552697411 | 5.068855964  | 9.62E-05   | 0.00392093 | GDF11     | 12 | 55743280  | 55757278  | 1  |
| ENSG00000164949 | -2.67843772 | 6.093384966  | 3.29E-07   | 6.62E-05   | GEM       | 8  | 94249253  | 94262350  | -1 |
| ENSG00000198380 | -1.20595156 | 7.315628599  | 0.00012296 | 0.00461208 | GFPT1     | 2  | 69319769  | 69387254  | -1 |
| ENSG00000139436 | 1.199710072 | 5.238001657  | 0.00011231 | 0.00434703 | GIT2      | 12 | 109929792 | 109996389 | -1 |
| ENSG00000138604 | -1.4575728  | 5.547006869  | 3.33E-05   | 0.00185595 | GLCE      | 15 | 69160584  | 69272217  | 1  |
| ENSG00000074047 | 3.607959627 | 1.911911388  | 3.53E-09   | 2.58E-06   | GLI2      | 2  | 120735623 | 120992653 | 1  |
| ENSG00000106571 | 1.824122732 | 3.215982524  | 5.18E-05   | 0.00253706 | GLI3      | 7  | 41960950  | 42237870  | -1 |
| ENSG00000112624 | 1.628190865 | 4.390059568  | 3.72E-05   | 0.00200358 | GLTSCR1L  | 6  | 42746958  | 42868560  | 1  |
| ENSG00000134697 | -1.14500607 | 6.182138566  | 0.0001504  | 0.00528503 | GNL2      | 1  | 37566816  | 37595935  | -1 |
| ENSG00000130119 | 1.484365302 | 4.481831178  | 3.60E-05   | 0.00196323 | GNL3L     | X  | 54530211  | 54561071  | 1  |
| ENSG00000135052 | 1.145248953 | 8.338056743  | 9.06E-05   | 0.00374467 | GOLM1     | 9  | 86026146  | 86100173  | -1 |
| ENSG00000111711 | -1.27908892 | 6.243292148  | 3.99E-05   | 0.00212407 | GOLT1B    | 12 | 21501781  | 21518408  | 1  |
| ENSG00000186566 | 1.480176331 | 5.399024588  | 0.00010345 | 0.00411203 | GPATCH8   | 17 | 44395284  | 44503430  | -1 |
| ENSG00000170075 | 1.74466466  | 2.961841306  | 5.51E-05   | 0.00264248 | GPR37L1   | 1  | 202122858 | 202133592 | 1  |
| ENSG00000152208 | 2.256103602 | 5.609443028  | 3.22E-05   | 0.00180507 | GRID2     | 4  | 92303622  | 93774556  | 1  |
| ENSG00000117189 | 1.623472377 | 5.628320155  | 2.67E-06   | 0.00031718 | GRIK1     | 21 | 29536933  | 29940033  | -1 |
| ENSG00000109519 | -1.05580498 | 5.165000191  | 0.00024707 | 0.00746811 | GRPEL1    | 4  | 7058906   | 7068197   | -1 |
| ENSG00000082701 | 1.269264315 | 6.723815839  | 0.00015441 | 0.00538684 | GSK3B     | 3  | 119821323 | 120094417 | -1 |
| ENSG00000137947 | -1.56191586 | 5.126177731  | 1.66E-05   | 0.00116727 | GTF2B     | 1  | 88852932  | 88891944  | -1 |
| ENSG00000107937 | -1.42320765 | 6.289136697  | 4.18E-05   | 0.00220514 | GTPBP4    | 10 | 988019    | 1019936   | 1  |
| ENSG00000125812 | -1.326678   | 5.337951767  | 0.00014177 | 0.00504424 | GZF1      | 20 | 23362182  | 23373063  | 1  |
| ENSG00000184897 | 1.284121926 | 4.082998091  | 0.00028609 | 0.00820892 | H1FX      | 3  | 129314771 | 129316277 | -1 |
| ENSG00000132475 | -1.18388668 | 9.198621302  | 1.84E-06   | 0.00023659 | H3F3B     | 17 | 75776434  | 75785893  | -1 |
| ENSG00000188875 | -8.52691169 | 1.316069564  | 2.31E-08   | 8.82E-06   | H3F3C     | 12 | 31791185  | 31792241  | -1 |
| ENSG00000138796 | 1.707433195 | 4.177384749  | 0.00011368 | 0.00438513 | HADH      | 4  | 107989714 | 108035175 | 1  |
| ENSG00000063854 | -1.37834641 | 5.140519307  | 0.00010063 | 0.00402813 | HAGH      | 16 | 1795620   | 1827194   | -1 |
| ENSG00000187664 | 3.488517439 | 0.402465869  | 3.01E-05   | 0.00173706 | HAPLN4    | 19 | 19255641  | 19262796  | -1 |
| ENSG00000103044 | -2.99988826 | 2.4045056    | 0.0001793  | 0.00597854 | HAS3      | 16 | 69105564  | 69118719  | 1  |
| ENSG00000143575 | -0.99993591 | 5.763107424  | 0.0001218  | 0.00459906 | HAX1      | 1  | 154272511 | 154275875 | 1  |
| ENSG00000113070 | -3.53984012 | 5.214624364  | 9.43E-06   | 0.00075178 | HBEGF     | 5  | 140332843 | 140346631 | -1 |
| ENSG00000172534 | 2.434338578 | 4.422691812  | 2.74E-05   | 0.00162729 | HCFC1     | X  | 153947553 | 153971807 | -1 |
| ENSG00000165478 | 2.735926725 | 5.297683204  | 1.93E-06   | 0.00024497 | HEPACAM   | 11 | 124919193 | 124936412 | -1 |
| ENSG00000051108 | -1.54608867 | 6.538008819  | 2.33E-05   | 0.0014782  | HERPUD1   | 16 | 56932048  | 56944863  | 1  |
| ENSG00000177374 | -4.25303389 | 1.073253342  | 1.51E-06   | 0.00019722 | HIC1      | 17 | 2054154   | 2063241   | 1  |
| ENSG00000064393 | 2.361321165 | 6.721978169  | 2.61E-07   | 5.65E-05   | HIPK2     | 7  | 139561570 | 139777778 | -1 |
| ENSG00000184678 | 1.100025575 | 6.24588559   | 0.00033072 | 0.00909445 | HIST2H2BE | 1  | 149842204 | 149886652 | -1 |
| ENSG00000135486 | 1.39249474  | 8.897262664  | 0.00032399 | 0.00898522 | HNRNPA1   | 12 | 54280193  | 54287088  | 1  |
| ENSG00000170144 | 1.476496588 | 6.694731971  | 9.61E-05   | 0.00392093 | HNRNPA3   | 2  | 177212563 | 177223958 | 1  |
| ENSG00000096746 | 2.845441265 | 6.052152988  | 2.43E-05   | 0.00150818 | HNRNPH3   | 10 | 68331174  | 68343191  | 1  |
| ENSG00000105323 | 1.61005597  | 6.525202414  | 1.73E-05   | 0.00119523 | HNRNPULL1 | 19 | 41262496  | 41307598  | 1  |
| ENSG00000152413 | -2.55950233 | 5.43160967   | 4.66E-08   | 1.52E-05   | HOMER1    | 5  | 79372636  | 79514217  | -1 |
| ENSG00000134709 | -2.42241641 | 2.899131662  | 3.07E-05   | 0.00175391 | HOOK1     | 1  | 59814786  | 59876378  | 1  |
| ENSG00000257017 | -5.48334222 | 5.467698387  | 3.67E-05   | 0.00198781 | HP        | 16 | 72054592  | 72061055  | 1  |
| ENSG00000166189 | -1.65833566 | 4.00329844   | 8.93E-06   | 0.00072523 | HPS6      | 10 | 102065390 | 102068038 | 1  |
| ENSG00000106211 | 2.170318395 | 3.271859312  | 0.00012244 | 0.00460787 | HSPB1     | 7  | 76302544  | 76304295  | 1  |
| ENSG00000086758 | 1.621398575 | 8.196181528  | 6.43E-06   | 0.0005808  | HUWE1     | X  | 53532096  | 53686729  | -1 |
| ENSG00000068001 | -1.38058392 | 5.581848179  | 0.0003079  | 0.00872423 | HYAL2     | 3  | 50317790  | 50322906  | -1 |
| ENSG00000105376 | -3.82826835 | -0.078460229 | 0.00020334 | 0.00654429 | ICAM5     | 19 | 10289981  | 10296778  | 1  |
| ENSG00000112144 | 1.678993159 | 4.725653032  | 0.00011086 | 0.00432525 | ICK       | 6  | 53001279  | 53061802  | -1 |
| ENSG00000125968 | -6.21500347 | 2.792491849  | 9.73E-05   | 0.00394008 | ID1       | 20 | 31605283  | 31606515  | 1  |
| ENSG00000115738 | -2.44485766 | 6.528157348  | 0.00018304 | 0.00607518 | ID2       | 2  | 8678845   | 8684453   | 1  |
| ENSG00000117318 | -6.80509349 | 2.304687587  | 2.42E-05   | 0.00150859 | ID3       | 1  | 23557918  | 23559794  | -1 |
| ENSG00000010404 | 2.109878823 | 7.420639745  | 2.91E-06   | 0.00033308 | IDS       | X  | 149476990 | 149521096 | -1 |
| ENSG00000137331 | -3.1270617  | -0.116805466 | 8.84E-05   | 0.00367939 | IER3      | 6  | 30743199  | 30744554  | -1 |
| ENSG00000134049 | -1.03822932 | 5.620019925  | 8.55E-05   | 0.00361584 | IER3IP1   | 18 | 47152998  | 47176374  | -1 |
| ENSG00000163565 | 1.742420254 | 5.174561145  | 0.00012727 | 0.00471123 | IFI16     | 1  | 158999968 | 159055155 | 1  |
| ENSG00000119917 | 2.445663611 | 3.014530153  | 9.86E-07   | 0.0001442  | IFIT3     | 10 | 89327894  | 89340971  | 1  |
| ENSG00000027697 | -1.03184267 | 6.210460682  | 0.00014577 | 0.00515422 | IFNGR1    | 6  | 137197484 | 137219449 | -1 |
| ENSG00000174498 | 1.720906975 | 3.273296738  | 0.00018818 | 0.00618702 | IGDCC3    | 15 | 65327127  | 65378040  | -1 |
| ENSG00000017427 | -5.19690782 | 1.296953989  | 7.99E-05   | 0.00346999 | IGF1      | 12 | 102395867 | 102480645 | -1 |
| ENSG00000159217 | 1.998882931 | 3.921673694  | 8.59E-05   | 0.00361584 | IGF2BP1   | 17 | 48997412  | 49055650  | 1  |
| ENSG00000146674 | -4.21018274 | 5.430971409  | 2.01E-08   | 7.83E-06   | IGFBP3    | 7  | 45912245  | 45921874  | -1 |
| ENSG00000204866 | -7.79678231 | -1.823553185 | 0.00011108 | 0.00432525 | IGFL2     | 19 | 46143106  | 46161299  | 1  |
| ENSG00000263528 | 1.956301102 | 2.254484317  | 7.02E-05   | 0.00314012 | IKBKE     | 1  | 206470476 | 206496889 | 1  |
| ENSG00000095752 | -5.57361743 | 4.525540108  | 5.54E-09   | 3.48E-06   | IL11      | 19 | 55364389  | 55370463  | -1 |
| ENSG00000144730 | 1.87433389  | 6.209815724  | 7.25E-05   | 0.00320928 | IL17RD    | 3  | 57089982  | 57170306  | -1 |
| ENSG00000115008 | -3.96299157 | -0.444811074 | 0.00013333 | 0.00483647 | IL1A      | 2  | 112773915 | 112784590 | -1 |
| ENSG00000178035 | -0.88691122 | 7.238684955  | 0.00034206 | 0.00928884 | IMPDH2    | 3  | 49024325  | 49029408  | -1 |
| ENSG00000139269 | -9.22007783 | -0.001162428 | 4.34E-06   | 0.0004445  | INHBE     | 12 | 57452323  | 57459280  | 1  |
| ENSG00000143624 | 1.34058535  | 5.763502591  | 0.00014551 | 0.00515043 | INTS3     | 1  | 153728067 | 153774808 | 1  |
| ENSG00000127080 | -1.68246224 | 4.741255773  | 3.07E-05   | 0.00175391 | IPPK      | 9  | 92613184  | 92670265  | -1 |
| ENSG00000126456 | -1.44753334 | 4.947145701  | 5.87E-05   | 0.00275364 | IRF3      | 19 | 49659569  | 49665875  | -1 |

|                 |             |              |            |            |           |    |           |           |    |
|-----------------|-------------|--------------|------------|------------|-----------|----|-----------|-----------|----|
| ENSG00000063241 | -1.60097873 | 3.845029601  | 1.92E-05   | 0.00128607 | ISOC2     | 19 | 55452985  | 55462343  | -1 |
| ENSG00000132470 | 2.065709795 | 5.94734225   | 4.34E-05   | 0.0022717  | ITGB4     | 17 | 75721328  | 75757818  | 1  |
| ENSG00000162267 | -7.8394808  | -1.398851575 | 2.98E-05   | 0.00172804 | ITIH3     | 3  | 52794768  | 52809009  | 1  |
| ENSG00000143772 | 2.126254403 | 7.419261206  | 1.35E-05   | 0.00099677 | ITPKB     | 1  | 226631690 | 226739323 | -1 |
| ENSG00000123104 | 1.214811005 | 8.34927576   | 2.38E-05   | 0.00150121 | ITPR2     | 12 | 26336515  | 26833198  | -1 |
| ENSG00000081692 | -2.25831689 | 4.722943878  | 6.43E-05   | 0.00295174 | JMJD4     | 1  | 227730425 | 227735411 | -1 |
| ENSG00000186994 | -3.05089472 | 0.241720465  | 4.30E-05   | 0.00225862 | KANK3     | 19 | 8322584   | 8343262   | -1 |
| ENSG00000132854 | -5.18257015 | 0.535239883  | 1.69E-05   | 0.00117412 | KANK4     | 1  | 62236979  | 62319414  | -1 |
| ENSG00000156650 | 1.660828977 | 4.327836566  | 5.66E-05   | 0.00268866 | KAT6B     | 10 | 74825582  | 75032622  | 1  |
| ENSG00000107821 | -2.82925121 | 1.803094983  | 8.62E-05   | 0.00361584 | KAZALD1   | 10 | 101061841 | 101068131 | 1  |
| ENSG00000177301 | 2.072584153 | 3.802730366  | 8.54E-05   | 0.00361584 | KCNA2     | 1  | 110593580 | 110631474 | -1 |
| ENSG00000182255 | -3.59310818 | 3.987678844  | 5.23E-05   | 0.00254912 | KCNA4     | 11 | 30009741  | 30017023  | -1 |
| ENSG00000152049 | -4.55339179 | 4.911773659  | 2.83E-06   | 0.00032799 | KCNE4     | 2  | 223051814 | 223198399 | 1  |
| ENSG00000177807 | 2.054296757 | 3.792576151  | 1.62E-07   | 3.90E-05   | KCNJ10    | 1  | 160037467 | 160070248 | -1 |
| ENSG00000123700 | -1.66956341 | 4.618274293  | 0.00021919 | 0.006845   | KCNJ2     | 17 | 70168673  | 70180048  | 1  |
| ENSG00000099337 | -6.80958573 | 0.068448864  | 9.78E-05   | 0.00394764 | KCNK6     | 19 | 38319844  | 38332076  | 1  |
| ENSG00000143603 | 2.274287193 | 6.399417611  | 5.82E-05   | 0.0027395  | KCNN3     | 1  | 154697455 | 154870280 | -1 |
| ENSG00000053918 | -6.47427945 | -1.544392327 | 0.00015588 | 0.00539927 | KCNQ1     | 11 | 2444684   | 2849109   | 1  |
| ENSG00000162687 | 1.444778523 | 5.250381656  | 0.00019097 | 0.00626019 | KCNT2     | 1  | 196225779 | 196609225 | -1 |
| ENSG00000100196 | -2.85799263 | 4.307270058  | 1.09E-06   | 0.00015406 | KDEL3     | 22 | 38468062  | 38483447  | 1  |
| ENSG00000088247 | 1.298349012 | 4.949693247  | 0.00018584 | 0.00614751 | KHSRP     | 19 | 6413348   | 6424794   | -1 |
| ENSG00000166783 | 2.370602784 | 4.349340043  | 6.15E-07   | 0.00010235 | KIAA0430  | 16 | 15594386  | 15643166  | -1 |
| ENSG00000121210 | 1.410879947 | 3.772193145  | 0.00010526 | 0.00416921 | KIAA0922  | 4  | 153466346 | 153636711 | 1  |
| ENSG00000164976 | 1.970778019 | 4.627180118  | 7.38E-06   | 0.00063421 | KIAA1161  | 9  | 34366670  | 34376853  | -1 |
| ENSG00000109265 | 1.366294422 | 6.072748044  | 0.00033645 | 0.00018082 | KIAA1211  | 4  | 56049073  | 56328625  | 1  |
| ENSG00000196872 | -3.26199879 | 0.764922503  | 1.14E-05   | 0.00087697 | KIAA1211L | 2  | 98793846  | 98936259  | -1 |
| ENSG00000122778 | 1.871290905 | 5.454455533  | 4.53E-05   | 0.00232289 | KIAA1549  | 7  | 138831381 | 138981318 | -1 |
| ENSG00000130518 | 3.391452809 | 2.67088612   | 0.00023534 | 0.00719049 | KIAA1683  | 19 | 18257097  | 18274509  | -1 |
| ENSG00000155090 | -4.07083447 | 4.836430542  | 2.23E-06   | 0.00027357 | KLF10     | 8  | 102648779 | 102655902 | -1 |
| ENSG00000172059 | 2.216094672 | 2.532108154  | 3.23E-05   | 0.00180653 | KLF11     | 2  | 10042849  | 10054836  | 1  |
| ENSG00000118922 | 1.585850507 | 6.318967689  | 6.86E-06   | 0.00060923 | KLF12     | 13 | 73686089  | 74133905  | -1 |
| ENSG00000109787 | 1.962202875 | 5.681356265  | 2.29E-06   | 0.00027889 | KLF3      | 4  | 38664196  | 38701042  | 1  |
| ENSG00000205809 | -1.23249737 | -1.349693247 | 5.64E-05   | 0.00267919 | KLRC2     | 12 | 10426854  | 10442300  | -1 |
| ENSG00000213809 | 5.465821041 | -1.798362488 | 0.00032134 | 0.00895366 | KLRK1     | 12 | 10372353  | 10391874  | -1 |
| ENSG00000118058 | 2.041071042 | 6.696454042  | 0.0001243  | 0.00463654 | KMT2A     | 11 | 118436490 | 118526832 | 1  |
| ENSG00000055609 | 1.483666009 | 7.020656186  | 0.00010595 | 0.00417704 | KMT2C     | 7  | 152134922 | 152436005 | -1 |
| ENSG00000198841 | -2.24778439 | 3.399760417  | 8.28E-06   | 0.00068343 | KTI12     | 1  | 52032103  | 52033816  | -1 |
| ENSG00000115919 | -8.94188166 | -1.223982721 | 0.00017249 | 0.00582023 | KYNU      | 2  | 142877498 | 143055832 | 1  |
| ENSG00000196976 | -1.41302779 | 3.461420185  | 3.17E-05   | 0.00178987 | LAGE3     | X  | 154477769 | 154479257 | -1 |
| ENSG00000155506 | 1.346645802 | 6.750738776  | 0.00037073 | 0.00980479 | LARP1     | 5  | 154712902 | 154817607 | 1  |
| ENSG00000138709 | -1.23249737 | 5.641217955  | 0.00022428 | 0.00694628 | LARP1B    | 4  | 128061268 | 128222931 | 1  |
| ENSG00000131023 | 1.631178    | 5.39659299   | 7.77E-05   | 0.00340182 | LATS1     | 6  | 149658153 | 149718256 | -1 |
| ENSG00000172954 | 1.747046221 | 5.655100996  | 0.00034782 | 0.00939277 | LCLAT1    | 2  | 30447226  | 30644225  | 1  |
| ENSG00000168806 | -2.08238599 | 4.578901244  | 1.72E-05   | 0.0011915  | LCMT2     | 15 | 43323649  | 43330605  | -1 |
| ENSG00000179241 | 1.528123703 | 5.426171319  | 1.38E-05   | 0.00101665 | LDLRAD3   | 11 | 35943981  | 36232136  | 1  |
| ENSG00000182195 | 3.334329063 | 1.893994691  | 1.03E-06   | 0.00014769 | LDOC1     | X  | 141175745 | 141177125 | -1 |
| ENSG00000105617 | -2.05500376 | 0.996353435  | 9.92E-05   | 0.00398458 | LENG1     | 19 | 54155161  | 54159882  | -1 |
| ENSG00000167615 | 1.309808722 | 3.606211172  | 0.00021697 | 0.00679522 | LENG8     | 19 | 54448887  | 54462037  | 1  |
| ENSG00000128342 | -4.74872787 | 3.672557436  | 1.26E-08   | 5.93E-06   | LIF       | 22 | 30240447  | 30246851  | -1 |
| ENSG00000050405 | -1.67063025 | 8.234021067  | 9.82E-05   | 0.00395848 | LIMA1     | 12 | 50175788  | 50283546  | -1 |
| ENSG00000160789 | -1.90835226 | 6.865071882  | 0.00025336 | 0.00761769 | LMNA      | 1  | 156082573 | 156140089 | 1  |
| ENSG00000134013 | -3.59611937 | 4.2508507    | 0.00014037 | 0.00501588 | LOXL2     | 8  | 23297189  | 23425328  | -1 |
| ENSG00000197324 | 1.421245796 | 6.026890354  | 0.0002918  | 0.00833765 | LRP10     | 14 | 22871613  | 22881580  | 1  |
| ENSG00000147650 | -1.21946356 | 5.789800405  | 0.00016105 | 0.00552921 | LRP12     | 8  | 104489231 | 104589024 | -1 |
| ENSG00000204052 | -2.42695915 | 1.389659109  | 0.00018748 | 0.00617851 | LRRC73    | 6  | 43506969  | 43510686  | -1 |
| ENSG00000171017 | -2.39986553 | 1.955668614  | 2.39E-05   | 0.0015012  | LRRC8E    | 19 | 7888505   | 7902021   | 1  |
| ENSG00000170382 | 1.883725485 | 4.017312909  | 0.00014524 | 0.00514612 | LRRN2     | 1  | 204617170 | 204685733 | -1 |
| ENSG00000185565 | 1.631459276 | 7.136890465  | 5.40E-05   | 0.00261135 | LSAMP     | 3  | 115802363 | 117139389 | -1 |
| ENSG00000168056 | 1.841957192 | 4.256739549  | 0.00018602 | 0.00614751 | LTBP3     | 11 | 65538560  | 65558930  | -1 |
| ENSG00000011009 | -1.37289808 | 5.132999159  | 0.00010423 | 0.00413824 | LYPLA2    | 1  | 23790970  | 23795539  | 1  |
| ENSG00000133800 | 5.976490341 | -0.833070442 | 3.47E-05   | 0.00190274 | LYVE1     | 11 | 10556966  | 10611689  | -1 |
| ENSG00000124688 | -1.25537318 | 4.476429677  | 0.00032982 | 0.00907997 | MAD2L1BP  | 6  | 43629540  | 43640952  | 1  |
| ENSG00000178573 | -1.26461048 | 4.725195677  | 0.00033346 | 0.00912354 | MAF       | 16 | 79585843  | 79600714  | -1 |
| ENSG00000185022 | -4.40607708 | 4.759718361  | 2.08E-05   | 0.00135436 | MAFF      | 22 | 38200767  | 38216511  | 1  |
| ENSG00000198042 | -1.82545122 | 5.38855014   | 1.08E-06   | 0.00015281 | MAK16     | 8  | 33484750  | 33501260  | 1  |
| ENSG00000184384 | 1.540711307 | 6.140561618  | 2.28E-05   | 0.00145333 | MAML2     | 11 | 95976598  | 96343180  | -1 |
| ENSG00000013619 | 2.461277369 | 2.376946735  | 8.00E-06   | 0.00067084 | MAMLD1    | X  | 150361422 | 150514178 | 1  |
| ENSG00000145050 | -1.65728461 | 5.012513061  | 0.00026957 | 0.00794305 | MANF      | 3  | 51385047  | 51389397  | 1  |
| ENSG00000166963 | 2.540391951 | 7.338060072  | 9.08E-07   | 0.0001368  | MAP1A     | 15 | 43510958  | 43531620  | 1  |
| ENSG00000168175 | 1.398142865 | 6.374797731  | 7.42E-06   | 0.00063641 | MAPK1IP1L | 14 | 55051631  | 55070192  | 1  |
| ENSG00000247626 | -1.57436459 | 3.692415461  | 0.00014225 | 0.00505632 | MARS2     | 2  | 197705369 | 197708387 | 1  |
| ENSG00000088888 | 1.188940804 | 6.606678778  | 0.000132   | 0.00481674 | MAVS      | 20 | 3846799   | 3876123   | 1  |
| ENSG00000204406 | 1.911704022 | 5.121438467  | 8.39E-05   | 0.00357101 | MBD5      | 2  | 148021011 | 148516971 | 1  |
| ENSG00000166603 | -3.26274846 | 1.759825548  | 1.42E-06   | 0.00019047 | MC4R      | 18 | 60371110  | 60372775  | -1 |
| ENSG00000137337 | 2.133558128 | 1.392086492  | 0.00016936 | 0.00576048 | MDC1      | 6  | 30699807  | 30717889  | -1 |
| ENSG00000198625 | 1.343971231 | 6.381950926  | 5.55E-05   | 0.00264926 | MDM4      | 1  | 204516379 | 204558120 | 1  |
| ENSG00000085276 | -4.638038   | -0.477888914 | 3.38E-05   | 0.00187483 | MECOM     | 3  | 169083499 | 169663618 | -1 |
| ENSG00000169057 | 1.28391432  | 5.766204089  | 0.00016696 | 0.00570742 | MECP2     | X  | 154021573 | 154137103 | -1 |
| ENSG00000180182 | 1.952875624 | 5.262160994  | 0.00027868 | 0.00809396 | MED14     | X  | 40648306  | 40735858  | -1 |
| ENSG00000175221 | 1.64270147  | 3.647174157  | 0.00033977 | 0.00924164 | MED16     | 19 | 867630    | 893218    | -1 |
| ENSG00000159479 | -1.40822716 | 4.784326246  | 7.92E-06   | 0.00066747 | MED8      | 1  | 43383917  | 43389808  | -1 |

|                  |             |              |            |            |           |    |           |           |    |
|------------------|-------------|--------------|------------|------------|-----------|----|-----------|-----------|----|
| ENSG00000116604  | 2.001127012 | 3.971001295  | 0.00035971 | 0.00959926 | MEF2D     | 1  | 156463727 | 156500828 | -1 |
| ENSG00000105429  | 1.547692135 | 6.496236851  | 3.37E-05   | 0.00187438 | MEGF8     | 19 | 42325609  | 42378769  | 1  |
| ENSG00000005102  | -7.70907698 | -1.89266857  | 0.00033767 | 0.00920237 | MEOX1     | 17 | 43640388  | 43661954  | -1 |
| ENSG00000254726  | 1.567234806 | 5.340219005  | 0.00013491 | 0.00488211 | MEX3A     | 1  | 156072013 | 156081998 | -1 |
| ENSG00000168389  | -4.67786174 | 5.078343575  | 8.12E-06   | 0.00067558 | MFSOD2A   | 1  | 39955112  | 39969968  | 1  |
| ENSG00000168282  | -1.66097334 | 5.795975297  | 1.00E-06   | 0.00014515 | MGAT2     | 14 | 49620795  | 49623481  | 1  |
| ENSG00000008394  | 2.449506952 | 6.254232942  | 7.51E-08   | 2.28E-05   | MGST1     | 12 | 16347142  | 16609259  | 1  |
| ENSG00000271605  | -7.67264315 | -1.890901767 | 0.00015519 | 0.00539346 | MILR1     | 17 | 64449037  | 64468643  | 1  |
| ENSG00000148773  | 3.003137316 | 5.790455073  | 5.15E-05   | 0.00253238 | MKI67     | 10 | 128096659 | 128126385 | -1 |
| ENSG00000186260  | 1.589515886 | 5.335544425  | 8.28E-05   | 0.00354495 | MKL2      | 16 | 14071321  | 14266773  | 1  |
| ENSG00000168288  | -1.24175501 | 6.494254049  | 1.53E-05   | 0.00109505 | MMADHC    | 2  | 149569634 | 149587816 | -1 |
| ENSG00000196549  | -5.63897969 | 2.940942471  | 1.47E-05   | 0.00106482 | MME       | 3  | 155024124 | 155183729 | 1  |
| ENSG00000166670  | -5.69146398 | 1.729904568  | 4.18E-09   | 2.84E-06   | MMP10     | 11 | 102770503 | 102780628 | -1 |
| ENSG00000070444  | 1.814912653 | 3.190465678  | 5.30E-05   | 0.0025751  | MNT       | 17 | 2384060   | 2401118   | -1 |
| ENSG00000124217  | -1.39788262 | 4.012507455  | 0.00021386 | 0.00673372 | MOC53     | 20 | 50958826  | 50963931  | 1  |
| ENSG00000123562  | -1.01287893 | 8.513411243  | 8.74E-05   | 0.00365111 | MORF4L2   | X  | 103675496 | 103688158 | -1 |
| ENSG00000106330  | 3.003175283 | 1.649845716  | 1.58E-05   | 0.00112247 | MOSP3     | 7  | 100612102 | 100615384 | 1  |
| ENSG00000134042  | 3.483421119 | 3.192156201  | 3.82E-10   | 4.98E-07   | MRO       | 18 | 50795120  | 50825402  | -1 |
| ENSG00000180992  | -1.80709622 | 4.389274862  | 6.05E-07   | 0.00010164 | MRPL14    | 6  | 44113454  | 44127457  | -1 |
| ENSG00000158042  | -1.17702494 | 5.168617289  | 0.0003718  | 0.00982131 | MRPL17    | 11 | 6680782   | 6683401   | -1 |
| ENSG000001086504 | -1.10639987 | 5.2307011    | 0.00026536 | 0.00784645 | MRPL28    | 16 | 367384    | 370527    | -1 |
| ENSG00000149792  | -1.45795862 | 6.082068531  | 2.26E-06   | 0.00027641 | MRPL49    | 11 | 65122183  | 65127371  | 1  |
| ENSG00000183617  | -1.74111662 | 3.639489571  | 4.17E-06   | 0.00043604 | MRPL54    | 19 | 3762664   | 3768575   | 1  |
| ENSG00000204568  | -1.38927007 | 3.589028642  | 0.00020547 | 0.00656355 | MRPS18B   | 6  | 30617709  | 30626395  | 1  |
| ENSG00000215445  | -1.05282156 | 5.617903736  | 0.0002464  | 0.00745444 | MRSP7     | 17 | 75261674  | 75266373  | 1  |
| ENSG00000198804  | 2.011796935 | 10.65560654  | 3.23E-05   | 0.00180653 | MT-CO1    | MT | 5904      | 7445      | 1  |
| ENSG00000198712  | 2.043605488 | 8.428428078  | 2.86E-06   | 0.00032862 | MT-CO2    | MT | 7586      | 8269      | 1  |
| ENSG00000198938  | 2.88884148  | 9.927588903  | 6.29E-08   | 1.96E-05   | MT-CO3    | MT | 9207      | 9990      | 1  |
| ENSG00000198886  | 2.027349888 | 7.503272563  | 0.00020326 | 0.00654429 | MT-ND4    | MT | 10760     | 12137     | 1  |
| ENSG00000212907  | 1.991883623 | 4.537491705  | 0.00018039 | 0.00600313 | MT-ND4L   | MT | 10470     | 10766     | 1  |
| ENSG00000125148  | 2.193715983 | 1.227641261  | 0.00030099 | 0.0085434  | MT2A      | 16 | 56608199  | 56609497  | 1  |
| ENSG00000057935  | 1.025339077 | 5.917035223  | 0.0001965  | 0.00639108 | MTA3      | 2  | 42494569  | 42756947  | 1  |
| ENSG00000242114  | -3.26955562 | 1.062594791  | 5.23E-05   | 0.00254835 | MTFP1     | 22 | 30425530  | 30429053  | 1  |
| ENSG00000065911  | -3.04713096 | 5.484605682  | 4.12E-05   | 0.00218824 | MTHFD2    | 2  | 74198562  | 74217565  | 1  |
| ENSG00000139505  | -1.00754168 | 6.257910215  | 0.00018448 | 0.00610939 | MTMR6     | 13 | 25246201  | 25288009  | -1 |
| ENSG00000256045  | -9.29501186 | -0.286914849 | 2.83E-05   | 0.00166049 | MTRNR2L10 | X  | 55181391  | 55182920  | -1 |
| ENSG00000258223  | -6.06108579 | -0.45795975  | 2.68E-05   | 0.00160188 | MTRNR2L8  | 11 | 10507887  | 10509189  | -1 |
| ENSG00000132613  | 1.254733742 | 6.353346953  | 0.00015283 | 0.00534863 | MTSS1L    | 16 | 70661204  | 70686066  | -1 |
| ENSG00000179820  | 1.889934268 | 3.599112849  | 8.76E-05   | 0.00365316 | MYADM     | 19 | 53866223  | 53876437  | 1  |
| ENSG00000101057  | 3.588211922 | 2.730723455  | 4.38E-05   | 0.00227914 | MYBL2     | 20 | 43667019  | 43716496  | 1  |
| ENSG00000118680  | -0.94802782 | 7.073641299  | 0.00028379 | 0.00815692 | MYL12B    | 18 | 3261909   | 3278284   | 1  |
| ENSG00000162601  | 1.353547109 | 5.509654455  | 8.31E-05   | 0.0035472  | MYSM1     | 1  | 58654739  | 58700092  | -1 |
| ENSG00000138386  | -1.65135482 | 6.928091398  | 2.43E-05   | 0.00150818 | NAB1      | 2  | 190646746 | 190692766 | 1  |
| ENSG00000166886  | -3.86333281 | 6.244569362  | 1.77E-08   | 7.33E-06   | NAB2      | 12 | 57088894  | 57095476  | 1  |
| ENSG00000173559  | -2.64810143 | 5.292852795  | 1.21E-05   | 0.00091338 | NABP1     | 2  | 191678068 | 191696659 | 1  |
| ENSG00000253506  | -7.19707433 | -0.255816936 | 1.49E-09   | 1.30E-06   | NACA2     | 17 | 61590426  | 61591202  | -1 |
| ENSG00000160877  | 1.20019474  | 4.946727154  | 0.00028351 | 0.00815571 | NACC1     | 19 | 13118103  | 13141141  | 1  |
| ENSG00000095380  | -1.46105875 | 4.682386711  | 1.64E-05   | 0.00115659 | NANS      | 9  | 98056739  | 98083075  | 1  |
| ENSG00000166833  | 2.567308591 | 5.561078449  | 4.06E-08   | 1.36E-05   | NAV2      | 11 | 19350724  | 20121598  | 1  |
| ENSG00000176771  | 2.867388972 | 4.005827119  | 2.89E-06   | 0.00033105 | NCKAP5    | 2  | 132671799 | 133568463 | -1 |
| ENSG00000198646  | 1.949216651 | 4.230106233  | 3.44E-05   | 0.00189487 | NCOA6     | 20 | 34689097  | 34825649  | -1 |
| ENSG00000162736  | 1.464219851 | 6.03169034   | 0.00030982 | 0.00874943 | NCSTN     | 1  | 160343272 | 160358952 | 1  |
| ENSG00000131507  | 1.817479105 | 7.509093845  | 6.47E-07   | 0.00010614 | NDP1P1    | 5  | 142108505 | 142154443 | 1  |
| ENSG00000070614  | 1.65302063  | 6.012448843  | 5.54E-06   | 0.00051693 | NDST1     | 5  | 150485818 | 150558211 | 1  |
| ENSG00000178057  | -1.4325975  | 3.979408727  | 0.00028929 | 0.00829376 | NDUFAB3   | 3  | 49020459  | 49023495  | 1  |
| ENSG00000196712  | 1.456778802 | 7.370046821  | 1.26E-05   | 0.00093671 | NF1       | 17 | 31094927  | 31382116  | 1  |
| ENSG00000162599  | 2.330660683 | 8.147739538  | 9.23E-06   | 0.00074335 | NF1A      | 1  | 60865259  | 61462793  | 1  |
| ENSG00000141905  | 3.064650325 | 1.786548838  | 4.57E-05   | 0.0023292  | NFIC      | 19 | 3359563   | 3469217   | 1  |
| ENSG00000008441  | 2.880955954 | 4.167389969  | 6.08E-07   | 0.00010164 | NFIX      | 19 | 12995608  | 13098796  | 1  |
| ENSG00000129460  | -1.10011838 | 5.356944836  | 5.06E-05   | 0.0024972  | NGDN      | 14 | 23469688  | 23509862  | 1  |
| ENSG00000170113  | 1.137472529 | 5.908480568  | 0.00017416 | 0.00586269 | NIPA1     | 15 | 22773063  | 22829791  | 1  |
| ENSG00000163293  | -6.16423619 | 0.010539215  | 3.49E-07   | 6.81E-05   | NIPAL1    | 4  | 47914142  | 48040173  | 1  |
| ENSG00000167034  | -5.35736799 | -0.433275463 | 4.13E-05   | 0.00218824 | NKX3-1    | 8  | 23678693  | 23682927  | -1 |
| ENSG00000196338  | 2.232026956 | 4.869668443  | 1.78E-07   | 4.15E-05   | NLGN3     | X  | 71144831  | 71171201  | 1  |
| ENSG00000197696  | -1.82248025 | 3.530652885  | 6.55E-06   | 0.00058976 | NMB       | 15 | 84655129  | 84658563  | -1 |
| ENSG00000167207  | -3.20736905 | 0.837425688  | 0.00015539 | 0.00539346 | NOD2      | 16 | 50693603  | 50733077  | 1  |
| ENSG00000130935  | -0.92203126 | 6.343402916  | 0.00033491 | 0.00915333 | NOL11     | 17 | 67717833  | 67744531  | 1  |
| ENSG00000197183  | 1.541466857 | 3.835162637  | 0.00037992 | 0.00997398 | NOL4L     | 20 | 32443059  | 32585074  | -1 |
| ENSG00000111641  | -1.40332199 | 5.097285419  | 2.42E-05   | 0.00150818 | NOP2      | 12 | 6556863   | 6568691   | -1 |
| ENSG00000074181  | 1.783682676 | 4.905725906  | 7.19E-06   | 0.00062436 | NOTCH3    | 19 | 15159038  | 15200981  | -1 |
| ENSG00000196408  | -3.80277739 | -0.968006591 | 0.00024543 | 0.00743842 | NOXO1     | 16 | 1978917   | 1984192   | -1 |
| ENSG00000169246  | 5.923733324 | -0.96860619  | 7.93E-08   | 2.36E-05   | NPIP3     | 16 | 21402237  | 21448567  | -1 |
| ENSG00000243716  | 4.435425229 | -1.091247872 | 4.18E-05   | 0.00220514 | NPIP5     | 16 | 22479121  | 22536521  | 1  |
| ENSG00000175745  | 1.912586876 | 5.930265386  | 2.60E-05   | 0.00156997 | NR2F1     | 5  | 93583337  | 93594615  | 1  |
| ENSG00000185551  | 1.837925229 | 3.223024877  | 0.00023948 | 0.00728406 | NR2F2     | 15 | 96325938  | 96340263  | 1  |
| ENSG00000148572  | -1.56203058 | 4.260365623  | 1.79E-05   | 0.00122696 | NRBF2     | 10 | 63133247  | 63155031  | 1  |
| ENSG00000137404  | 3.207959928 | -0.492784149 | 0.00023785 | 0.00724759 | NRM       | 6  | 30688047  | 30691420  | -1 |
| ENSG00000125841  | 1.817487615 | 4.230180862  | 0.00033806 | 0.00920237 | NRSN2     | 20 | 346782    | 359660    | 1  |
| ENSG00000198400  | -7.95491477 | -0.057261167 | 0.00023855 | 0.0072623  | NTRK1     | 1  | 156815640 | 156881850 | 1  |
| ENSG00000148053  | 2.094028893 | 11.31289531  | 1.64E-05   | 0.00115659 | NTRK2     | 9  | 84668551  | 85027070  | 1  |
| ENSG00000120526  | -1.51633211 | 5.024782104  | 1.61E-05   | 0.00114262 | NUDCD1    | 8  | 109240919 | 109334385 | -1 |

|                  |              |              |            |            |          |    |           |           |    |
|------------------|--------------|--------------|------------|------------|----------|----|-----------|-----------|----|
| ENSG00000136159  | -1.4678289   | 3.797808279  | 2.02E-05   | 0.00133381 | NUDT15   | 13 | 48037567  | 48047222  | 1  |
| ENSG00000272325  | 1.116453201  | 8.11010248   | 0.00033355 | 0.00912354 | NUDT3    | 6  | 34279679  | 34392674  | -1 |
| ENSG00000126883  | 1.940770077  | 4.84672007   | 5.40E-06   | 0.00050594 | NUP214   | 9  | 131125561 | 131234670 | 1  |
| ENSG00000132661  | -1.42766901  | 3.373238304  | 2.55E-05   | 0.0015581  | NXT1     | 20 | 23350736  | 23354777  | 1  |
| ENSG00000183801  | -6.18897482  | -0.311721874 | 0.00018657 | 0.00615454 | OLFM11   | 11 | 7485388   | 7511377   | 1  |
| ENSG00000184221  | 7.044656597  | 1.720486702  | 9.41E-08   | 2.68E-05   | OLIG1    | 21 | 33070144  | 33072420  | 1  |
| ENSG00000126861  | 1.732562331  | 3.490496231  | 7.16E-05   | 0.00318146 | OMG      | 17 | 31272013  | 31297539  | -1 |
| ENSG00000116885  | -1.35763398  | 4.93778184   | 0.00012175 | 0.00459906 | OSCP1    | 1  | 36415827  | 36450451  | -1 |
| ENSG00000262664  | -1.49125702  | 4.026363701  | 0.00012097 | 0.00458808 | OVCA2    | 17 | 2041936   | 2043430   | 1  |
| ENSG00000117385  | -1.81506397  | 5.162620697  | 0.00021787 | 0.00681631 | P3H1     | 1  | 42746335  | 42767084  | -1 |
| ENSG00000072682  | -2.87636186  | 4.374085453  | 0.00037478 | 0.00987733 | P4HA2    | 5  | 132191838 | 132295315 | -1 |
| ENSG00000070756  | 1.56552946   | 6.300853914  | 2.48E-05   | 0.00152527 | PABPC1   | 8  | 100685816 | 100722809 | -1 |
| ENSG00000180370  | 1.723377436  | 6.243794312  | 4.89E-07   | 8.56E-05   | PAK2     | 3  | 196739857 | 196832647 | 1  |
| ENSG00000187867  | 2.825534961  | 1.969945813  | 7.08E-05   | 0.00315062 | PALM3    | 19 | 14053365  | 14059159  | -1 |
| ENSG00000073150  | 3.039230597  | 0.771412405  | 0.00024578 | 0.00744245 | PANX2    | 22 | 50170731  | 50180294  | 1  |
| ENSG00000170915  | 1.356861476  | 4.673954436  | 0.00029735 | 0.00846772 | PAQR8    | 6  | 52361421  | 52407777  | 1  |
| ENSG00000166889  | 1.585408157  | 3.666478045  | 0.00019267 | 0.00583445 | PATL1    | 11 | 59636716  | 59668980  | -1 |
| ENSG00000132570  | 1.344788653  | 3.454684066  | 0.00021014 | 0.00664797 | PCBD2    | 5  | 134904906 | 135007959 | 1  |
| ENSG00000171815  | 2.594565729  | 1.885473828  | 0.00020824 | 0.00659994 | PCDHB1   | 5  | 141051135 | 141059344 | 1  |
| ENSG00000253305  | 2.315874321  | 5.623079361  | 0.00034472 | 0.00933142 | PCDHGB6  | 5  | 141408021 | 141512979 | 1  |
| ENSG00000240184  | 3.275296592  | 4.172172857  | 0.00012275 | 0.00461208 | PCDHGC3  | 5  | 141475947 | 141512979 | 1  |
| ENSG00000126226  | -1.1755123   | 5.598907529  | 2.49E-05   | 0.00152533 | PCID2    | 13 | 113177539 | 113208715 | -1 |
| ENSG00000100982  | 1.320359164  | 3.388623438  | 0.0003425  | 0.0092936  | PCIF1    | 20 | 45934628  | 45948023  | 1  |
| ENSG00000248485  | -5.57548938  | -1.286768625 | 9.36E-05   | 0.00385383 | PCP4L1   | 1  | 161258727 | 161285450 | 1  |
| ENSG00000102230  | 1.585408157  | 5.553946828  | 0.00020566 | 0.00563655 | PCYT1B   | X  | 24558087  | 24672677  | -1 |
| ENSG00000005882  | 1.879656528  | 4.163452611  | 2.09E-06   | 0.00026198 | PKD2     | 17 | 50094737  | 50112152  | 1  |
| ENSG00000179889  | -1.48351854  | 5.59330175   | 4.80E-05   | 0.0024049  | PDXDC1   | 16 | 14974591  | 15139339  | 1  |
| ENSG00000162734  | 1.144778469  | 9.070553306  | 3.62E-05   | 0.00196798 | PEA15    | 1  | 160205337 | 160215376 | 1  |
| ENSG00000152684  | -1.379199961 | 4.932374915  | 0.00017308 | 0.00583445 | PELO     | 5  | 52787940  | 52804046  | 1  |
| ENSG00000100029  | -1.15763527  | 6.095482074  | 0.00027175 | 0.00798873 | PES1     | 22 | 30576625  | 30607083  | -1 |
| ENSG00000148985  | 1.364361264  | 3.673280139  | 0.00018801 | 0.00618702 | PGAP2    | 11 | 3797724   | 3826371   | 1  |
| ENSG00000013375  | -1.17785148  | 7.711906633  | 6.49E-05   | 0.00297087 | PGM3     | 6  | 83161150  | 83193936  | -1 |
| ENSG000001024138 | 2.672832865  | 4.43887893   | 8.84E-07   | 0.00013514 | PHACTR4  | 1  | 28369582  | 28500369  | 1  |
| ENSG00000111752  | 1.363297454  | 5.183001452  | 0.00018285 | 0.00606734 | PHC1     | 12 | 8913896   | 8941467   | 1  |
| ENSG00000109118  | 2.33025275   | 4.391225623  | 6.66E-07   | 0.00010869 | PHF12    | 17 | 28905250  | 28951771  | -1 |
| ENSG00000135365  | 1.814504325  | 4.846219699  | 0.00031522 | 0.00886501 | PHF21A   | 11 | 45929323  | 46121178  | -1 |
| ENSG00000100410  | -1.12908964  | 4.954931845  | 0.00019877 | 0.00643817 | PHF5A    | 22 | 41459717  | 41468725  | -1 |
| ENSG00000174307  | -2.47785207  | 5.149481922  | 2.54E-06   | 0.00030096 | PHLDA3   | 1  | 201464383 | 201469237 | -1 |
| ENSG00000198355  | -2.41680668  | 2.985518488  | 7.76E-05   | 0.00340182 | PIM3     | 22 | 49960513  | 49964080  | 1  |
| ENSG00000087842  | 2.199549844  | 5.094754405  | 4.43E-05   | 0.00229108 | PIR      | X  | 15384799  | 15493564  | -1 |
| ENSG00000162878  | -2.92235859  | 3.212613213  | 5.76E-05   | 0.00271685 | PKDCC    | 2  | 42048020  | 42058528  | 1  |
| ENSG00000165495  | 1.476915619  | 3.33582006   | 0.00035327 | 0.00950976 | PKNOX2   | 11 | 125164687 | 125433389 | 1  |
| ENSG00000103066  | -1.38018282  | 4.67715187   | 0.00013049 | 0.00480231 | PLA2G15  | 16 | 68245304  | 68261062  | 1  |
| ENSG00000126003  | 1.697585153  | 3.243417472  | 8.34E-05   | 0.00355616 | PLAGL2   | 20 | 32192503  | 32207791  | -1 |
| ENSG00000145632  | -1.78842745  | 6.67558345   | 0.00027946 | 0.00809396 | PLK2     | 5  | 58453982  | 58460260  | -1 |
| ENSG00000173846  | -3.33521206  | 3.086990399  | 3.41E-05   | 0.00188291 | PLK3     | 1  | 44800225  | 44805990  | 1  |
| ENSG00000198753  | 2.942767321  | 2.332424369  | 1.25E-10   | 2.35E-07   | PLXNB3   | X  | 153764196 | 153779346 | 1  |
| ENSG00000141682  | -3.25255277  | 4.170559633  | 2.73E-07   | 5.78E-05   | PMAIP1   | 18 | 59899948  | 59904306  | 1  |
| ENSG00000124225  | -2.10626828  | 5.909600276  | 2.15E-05   | 0.00138268 | PMPEA1   | 20 | 57648392  | 57711536  | -1 |
| ENSG00000140650  | -2.89258908  | 4.204327238  | 0.00011151 | 0.00432579 | PMM2     | 16 | 8788823   | 8849331   | 1  |
| ENSG00000147588  | 2.629426607  | 9.904386753  | 0.00021503 | 0.0067584  | PMP2     | 8  | 81440326  | 81447523  | -1 |
| ENSG00000171453  | -1.1568204   | 5.263153951  | 0.00016988 | 0.00577246 | POLR1C   | 6  | 43509702  | 43529585  | 1  |
| ENSG00000102978  | -1.37443527  | 6.290083909  | 3.95E-06   | 0.00041654 | POLR2C   | 16 | 57462387  | 57472010  | 1  |
| ENSG00000163882  | -1.51477248  | 4.994729242  | 1.46E-07   | 3.63E-05   | POLR2H   | 3  | 184361718 | 184368596 | 1  |
| ENSG00000104356  | -1.67577151  | 3.766861816  | 2.92E-05   | 0.00170381 | POP1     | 8  | 98117297  | 98159834  | 1  |
| ENSG00000077157  | 1.503073644  | 6.045516823  | 7.58E-05   | 0.00333613 | PPP1R12B | 1  | 202348699 | 202592706 | 1  |
| ENSG00000243279  | 2.35404367   | 2.09235193   | 0.00026063 | 0.00776173 | PRAF2    | X  | 49071156  | 49074071  | -1 |
| ENSG00000138073  | -1.24116462  | 5.150712103  | 5.21E-05   | 0.00254336 | PREB     | 2  | 27130756  | 27134675  | -1 |
| ENSG00000163932  | -2.69438681  | 0.784228852  | 8.87E-05   | 0.00368662 | PRKCD    | 3  | 53156009  | 53192717  | 1  |
| ENSG00000253729  | 1.214503859  | 8.849845544  | 0.00024316 | 0.00737619 | PRKDC    | 8  | 47773108  | 47960183  | -1 |
| ENSG00000172179  | -9.97799476  | -1.435334666 | 1.43E-06   | 0.00019083 | PRL      | 6  | 22287244  | 22297501  | -1 |
| ENSG00000126457  | -1.27006184  | 6.88721548   | 2.77E-05   | 0.0016325  | PRMT1    | 19 | 49675786  | 49689029  | 1  |
| ENSG00000117707  | 1.612048857  | 4.79791808   | 5.04E-05   | 0.00249017 | PROX1    | 1  | 213983181 | 214041502 | 1  |
| ENSG00000174231  | 1.645615936  | 7.116231649  | 0.00028527 | 0.00819246 | PRPF8    | 17 | 1650629   | 1684882   | -1 |
| ENSG00000205352  | 1.528573585  | 3.766457897  | 0.00014953 | 0.00525981 | PRR13    | 12 | 53441605  | 53446645  | 1  |
| ENSG00000204469  | 2.083163278  | 5.028457753  | 4.42E-05   | 0.00228853 | PRRC2A   | 6  | 31620720  | 31637771  | 1  |
| ENSG00000117523  | 1.364259213  | 7.212812751  | 0.00014045 | 0.00501588 | PRRC2C   | 1  | 171485551 | 171593511 | 1  |
| ENSG00000150687  | -2.16939273  | 5.827821718  | 0.0001611  | 0.00552929 | PRSS23   | 11 | 86791059  | 86952910  | 1  |
| ENSG00000146250  | 3.86526236   | 7.217914925  | 1.88E-05   | 0.0012701  | PRSS35   | 6  | 83512538  | 83525704  | 1  |
| ENSG00000143106  | -1.11078338  | 6.389970278  | 0.00014601 | 0.00515758 | PSMA5    | 1  | 109399031 | 109426427 | -1 |
| ENSG00000159377  | -0.89010449  | 7.20719322   | 9.67E-05   | 0.00392908 | PSMB4    | 1  | 151399534 | 151401944 | 1  |
| ENSG00000100519  | -0.95975712  | 6.747090827  | 0.00016066 | 0.00552921 | PSMC6    | 14 | 52707172  | 52728587  | 1  |
| ENSG000000099341 | -1.42594319  | 6.717392157  | 0.00013783 | 0.0049667  | PSMD8    | 19 | 38374536  | 38383824  | 1  |
| ENSG00000131467  | 1.250959282  | 5.1379558    | 6.25E-05   | 0.0029002  | PSME3    | 17 | 42824385  | 42843758  | 1  |
| ENSG00000119314  | 1.532235259  | 7.238390227  | 6.26E-05   | 0.00290045 | PTBP3    | 9  | 112217716 | 112333667 | -1 |
| ENSG00000185920  | 2.139365941  | 5.034738368  | 0.00015526 | 0.00539346 | PTCH1    | 9  | 95442980  | 95517057  | -1 |
| ENSG00000125384  | -8.35413952  | -1.138681866 | 1.38E-06   | 0.00018812 | PTGER2   | 14 | 52314305  | 52328606  | 1  |
| ENSG00000073756  | -7.64392335  | 1.310720215  | 1.54E-05   | 0.00110204 | PTGS2    | 1  | 186671791 | 186680427 | -1 |
| ENSG00000160801  | -5.47035026  | 0.048997973  | 0.00025026 | 0.00753768 | PTH1R    | 3  | 46877746  | 46903799  | 1  |
| ENSG00000087494  | -4.73694507  | 1.667737001  | 2.47E-06   | 0.00029429 | PTHLH    | 12 | 27958084  | 27972705  | -1 |
| ENSG00000153707  | 1.61646658   | 7.784981017  | 8.07E-06   | 0.00067439 | PTPRD    | 9  | 8314246   | 10612723  | -1 |

|                 |              |              |            |            |           |    |           |           |    |
|-----------------|--------------|--------------|------------|------------|-----------|----|-----------|-----------|----|
| ENSG00000060656 | -3.99892114  | 1.928764615  | 4.55E-05   | 0.00232462 | PTPRU     | 1  | 29236516  | 29326813  | 1  |
| ENSG00000106278 | 2.055142757  | 9.546350196  | 6.54E-08   | 2.00E-05   | PTPRZ1    | 7  | 121873089 | 122062036 | 1  |
| ENSG00000177469 | -2.00113496  | 7.766083868  | 0.00020153 | 0.00650902 | PTRF      | 17 | 42402452  | 42423517  | -1 |
| ENSG00000185129 | 1.742054649  | 5.128425754  | 0.00036239 | 0.00964798 | PURA      | 5  | 140107777 | 140125619 | 1  |
| ENSG00000110060 | -1.23743462  | 3.664446336  | 0.00013893 | 0.00499566 | PUS3      | 11 | 125893485 | 125903221 | -1 |
| ENSG00000089159 | 2.081489937  | 3.643761531  | 5.69E-06   | 0.00052593 | PXN       | 12 | 120210439 | 120265771 | -1 |
| ENSG00000116260 | -1.59919737  | 4.60666702   | 0.00020372 | 0.00654429 | QSOX1     | 1  | 180154834 | 180204030 | 1  |
| ENSG00000156675 | -2.59467662  | 5.532052676  | 0.00019106 | 0.00626019 | RAB11FIP1 | 8  | 37858618  | 37899467  | -1 |
| ENSG00000107560 | 1.454224339  | 6.319920345  | 0.00012296 | 0.00461208 | RAB11FIP2 | 10 | 118004916 | 118046603 | -1 |
| ENSG00000172007 | -0.99820877  | 4.990111023  | 0.0003574  | 0.00956024 | RAB33B    | 4  | 139453232 | 139476609 | 1  |
| ENSG00000075785 | 1.488834676  | 6.073198611  | 1.31E-05   | 0.00097254 | RAB7A     | 3  | 128726122 | 128814796 | 1  |
| ENSG00000108352 | 2.001598055  | 2.461981313  | 6.99E-06   | 0.00061431 | RAPGEFL1  | 17 | 40177010  | 40195656  | 1  |
| ENSG00000113643 | -0.91777606  | 6.857126728  | 0.00021587 | 0.00677848 | RARS      | 5  | 168486445 | 168519299 | 1  |
| ENSG00000122035 | -4.69354509  | 0.852592483  | 0.00033329 | 0.00912354 | RASL11A   | 13 | 27270327  | 27273690  | 1  |
| ENSG00000068028 | -1.25128768  | 4.322005324  | 0.00012163 | 0.00459906 | RASSF1    | 3  | 50329782  | 50340980  | -1 |
| ENSG00000184863 | 1.503056392  | 5.397632132  | 9.84E-05   | 0.00395884 | RBM33     | 7  | 155644451 | 155781485 | 1  |
| ENSG00000107607 | -1.753852645 | 4.314372802  | 0.00011832 | 0.00450754 | RBMS2     | 12 | 56521929  | 56596196  | 1  |
| ENSG00000173653 | -1.65948157  | 2.937442952  | 7.05E-05   | 0.00314551 | RCE1      | 11 | 66842835  | 66846546  | 1  |
| ENSG00000117625 | 1.406940435  | 5.391158302  | 0.00026899 | 0.00793304 | RCOR3     | 1  | 211258377 | 211316385 | 1  |
| ENSG00000054967 | -2.25274003  | 2.982079757  | 0.00025749 | 0.00768745 | RELT      | 11 | 73376264  | 73397474  | 1  |
| ENSG00000079313 | 1.901257635  | 2.422284736  | 8.36E-05   | 0.00355921 | REXO1     | 12 | 1815246   | 1848463   | -1 |
| ENSG00000111783 | 2.143426876  | 8.011183167  | 9.65E-07   | 0.00014309 | RFX4      | 12 | 106582907 | 106762803 | 1  |
| ENSG00000182175 | 2.72241039   | 6.052036305  | 1.22E-05   | 0.00091842 | RGMA      | 15 | 93035273  | 93089204  | -1 |
| ENSG00000153165 | -6.47206195  | 0.000417695  | 9.74E-07   | 0.00014318 | RGPD3     | 2  | 106391290 | 106468376 | -1 |
| ENSG00000183054 | -8.14629487  | -1.410500157 | 5.89E-06   | 0.00053997 | RGPD6     | 2  | 110513812 | 110577185 | -1 |
| ENSG00000116741 | -2.94410751  | 4.390126315  | 4.73E-05   | 0.00237768 | RGS2      | 1  | 192809039 | 192812283 | 1  |
| ENSG00000117152 | -5.33392517  | 3.791370948  | 3.39E-05   | 0.00187483 | RGS4      | 1  | 163068775 | 163076802 | 1  |
| ENSG00000188672 | -4.21203446  | -1.041597788 | 0.00017136 | 0.00580251 | RHCE      | 1  | 25362249  | 25430192  | -1 |
| ENSG00000125352 | -1.60505998  | 2.883876983  | 3.37E-05   | 0.00187438 | RNF113A   | X  | 119870475 | 119871827 | -1 |
| ENSG00000170881 | -0.98647024  | 6.760414726  | 0.00022477 | 0.00695378 | RNF139    | 8  | 124474738 | 124487914 | 1  |
| ENSG00000235631 | -3.03114357  | 0.165995296  | 0.00037535 | 0.00988392 | RNF148    | 7  | 122701664 | 122702967 | -1 |
| ENSG00000108523 | 1.460322744  | 5.081940199  | 9.97E-05   | 0.00399458 | RNF167    | 17 | 4940008   | 4945222   | 1  |
| ENSG00000168894 | -1.10408318  | 4.819714589  | 8.11E-05   | 0.0035021  | RNF181    | 2  | 85595725  | 85597613  | 1  |
| ENSG00000173821 | 1.414624642  | 6.830165358  | 0.00012399 | 0.00463512 | RNF213    | 17 | 80260866  | 80398786  | 1  |
| ENSG00000163481 | -1.41150747  | 4.781325103  | 1.44E-05   | 0.00104095 | RNF25     | 2  | 218663864 | 218672411 | -1 |
| ENSG00000173456 | 2.019891645  | 3.529244173  | 0.00012174 | 0.00459906 | RNF26     | 11 | 119334527 | 119337313 | 1  |
| ENSG00000181852 | -1.62220784  | 6.452198456  | 5.19E-07   | 8.99E-05   | RNF41     | 12 | 56202175  | 56221933  | -1 |
| ENSG00000135119 | 1.67910661   | 5.034988052  | 8.16E-06   | 0.00067742 | RNFT2     | 12 | 116738178 | 116853631 | 1  |
| ENSG00000100316 | -1.02341446  | 9.783016765  | 0.00037312 | 0.00984109 | RPL3      | 22 | 39312882  | 39320389  | -1 |
| ENSG00000137818 | 2.82382038   | 7.383458521  | 1.40E-05   | 0.00102403 | RPLP1     | 15 | 69452784  | 69456194  | 1  |
| ENSG00000163902 | -1.03543873  | 8.529793392  | 0.00011597 | 0.0044545  | RPN1      | 3  | 128619970 | 128681075 | -1 |
| ENSG00000163125 | 2.226743162  | 4.893564883  | 9.01E-06   | 0.00072845 | RPRD2     | 1  | 150363091 | 150476566 | 1  |
| ENSG00000185088 | -1.47905312  | 7.05629005   | 2.83E-06   | 0.00032799 | RPS27L    | 15 | 63125872  | 63158021  | -1 |
| ENSG00000149273 | -1.16175667  | 8.460387391  | 0.00017893 | 0.00597221 | RPS3      | 11 | 75399486  | 75422280  | 1  |
| ENSG00000166133 | -1.67830985  | 3.704663724  | 1.66E-05   | 0.00116727 | RPUSD2    | 15 | 40569300  | 40574943  | 1  |
| ENSG00000048392 | -1.39469144  | 7.668626701  | 1.25E-05   | 0.00093379 | RRM2B     | 8  | 102204502 | 102239118 | -1 |
| ENSG00000133318 | 1.601244265  | 8.285631732  | 5.36E-06   | 0.0005058  | RTN3      | 11 | 63681446  | 63759891  | 1  |
| ENSG00000185924 | -7.00315995  | -1.70376112  | 0.00024139 | 0.0073357  | RTN4RL1   | 17 | 1934677   | 2025345   | -1 |
| ENSG00000160753 | 1.560573412  | 3.441396839  | 0.00022838 | 0.00702848 | RUSC1     | 1  | 155320896 | 155331114 | 1  |
| ENSG00000198838 | 2.592766953  | 5.770734907  | 5.17E-05   | 0.00253706 | RYR3      | 15 | 33310945  | 33866121  | 1  |
| ENSG00000170989 | -1.72564383  | 6.693864173  | 0.00013252 | 0.00482654 | S1PR1     | 1  | 101236888 | 101241518 | 1  |
| ENSG00000103449 | 1.951500192  | 6.850027691  | 5.98E-05   | 0.00279721 | SALL1     | 16 | 51135975  | 51151367  | -1 |
| ENSG00000165821 | 2.283372854  | 6.494602644  | 4.35E-06   | 0.0004445  | SALL2     | 14 | 21521081  | 21537216  | -1 |
| ENSG00000179134 | 1.541656202  | 4.702122634  | 0.00013336 | 0.00483647 | SAMD4B    | 19 | 39342396  | 39385710  | 1  |
| ENSG00000136715 | 1.878983055  | 4.118319048  | 1.18E-05   | 0.00089668 | SAP130    | 2  | 127941217 | 128028120 | -1 |
| ENSG00000168077 | 1.915325983  | 6.458527773  | 7.38E-06   | 0.00063421 | SCARA3    | 8  | 27633868  | 27676776  | 1  |
| ENSG00000079689 | 4.887852899  | 0.55055262   | 9.70E-05   | 0.00393425 | SCGN      | 6  | 25652201  | 25701783  | 1  |
| ENSG00000162512 | 2.382325994  | 8.029561004  | 1.39E-06   | 0.00018939 | SDC3      | 1  | 30869467  | 30908761  | -1 |
| ENSG00000117118 | -0.97255146  | 5.801637659  | 0.00011326 | 0.004374   | SDHB      | 1  | 17018722  | 17054170  | -1 |
| ENSG00000100934 | -1.46984507  | 7.460183546  | 3.82E-06   | 0.0004073  | SEC23A    | 14 | 39031919  | 39109646  | -1 |
| ENSG00000132432 | -1.35686376  | 5.811144819  | 0.00021944 | 0.00684645 | SEC61G    | 7  | 54752250  | 54759974  | -1 |
| ENSG00000075223 | -2.7322868   | 4.236890905  | 8.03E-05   | 0.00348259 | SEMA3C    | 7  | 80742538  | 80922359  | -1 |
| ENSG00000001617 | -3.45288174  | 0.919829441  | 8.70E-05   | 0.00363904 | SEMA3F    | 3  | 50155045  | 50189075  | 1  |
| ENSG00000010319 | -4.50197815  | -0.499987153 | 1.68E-05   | 0.00117212 | SEMA3G    | 3  | 52433053  | 52445085  | -1 |
| ENSG00000092421 | 2.056258283  | 5.835341631  | 0.00035605 | 0.00954862 | SEMA6A    | 5  | 116443616 | 116574934 | -1 |
| ENSG00000161956 | -1.08016929  | 5.907817422  | 0.00011146 | 0.00432579 | SENP3     | 17 | 7561875   | 7571969   | 1  |
| ENSG00000119231 | -1.11669728  | 6.75523747   | 0.00017554 | 0.00589398 | SENP5     | 3  | 196867856 | 196934714 | 1  |
| ENSG00000162430 | 2.203699126  | 4.864932999  | 8.63E-05   | 0.00361584 | SEPN1     | 1  | 25800176  | 25818224  | 1  |
| ENSG00000168528 | 1.839477397  | 1.959845842  | 0.00010899 | 0.00427214 | SERINC2   | 1  | 31409565  | 31434680  | 1  |
| ENSG00000166401 | -2.26379409  | 4.039550975  | 0.00022899 | 0.00703446 | SERPINB8  | 18 | 63969925  | 64005667  | 1  |
| ENSG00000106366 | -4.03851172  | 4.332359459  | 0.00013725 | 0.00495097 | SERPINE1  | 7  | 101127089 | 101139266 | 1  |
| ENSG00000149131 | 2.857000029  | 4.439053952  | 1.77E-06   | 0.00022826 | SERPING1  | 11 | 57597387  | 57614853  | 1  |
| ENSG00000197019 | -3.94773868  | 4.647554378  | 5.24E-09   | 3.35E-06   | SERTAD1   | 19 | 40421592  | 40426025  | -1 |
| ENSG00000152217 | 2.651076401  | 5.83263294   | 3.57E-06   | 0.00039086 | SETBP1    | 18 | 44680173  | 45068510  | 1  |
| ENSG00000099381 | 1.95724336   | 2.585439557  | 7.20E-05   | 0.00319144 | SETD1A    | 16 | 30957294  | 30985116  | 1  |
| ENSG00000168137 | 1.596007616  | 6.357768226  | 1.22E-05   | 0.00091773 | SETD5     | 3  | 9397615   | 9479240   | 1  |
| ENSG00000230667 | -7.99070118  | 0.213961652  | 1.53E-10   | 2.60E-07   | SETSIP    | 1  | 92074533  | 92075441  | -1 |
| ENSG00000143368 | 1.964576208  | 3.715871414  | 3.39E-05   | 0.00187527 | SF3B4     | 1  | 149923317 | 149928344 | -1 |
| ENSG00000213064 | 1.144738148  | 6.836235623  | 0.00020436 | 0.00655057 | SFT2D2    | 1  | 168225938 | 168253025 | 1  |
| ENSG00000118515 | -4.05855976  | 3.238568702  | 0.00011561 | 0.00444449 | SGK1      | 6  | 134169246 | 134318112 | -1 |
| ENSG00000164023 | -3.28424571  | 4.976230492  | 5.04E-06   | 0.000489   | SGMS2     | 4  | 107824563 | 107915047 | 1  |

|                 |             |              |            |            |          |    |           |           |    |
|-----------------|-------------|--------------|------------|------------|----------|----|-----------|-----------|----|
| ENSG00000027869 | -7.10798662 | -1.547875024 | 0.00027302 | 0.00799627 | SH2D2A   | 1  | 156806243 | 156816862 | -1 |
| ENSG00000172985 | 2.539312761 | 3.380765727  | 2.13E-06   | 0.00026604 | SH3RF3   | 2  | 109129348 | 109504632 | 1  |
| ENSG00000161681 | -4.38948714 | 0.174614614  | 0.0002609  | 0.00776173 | SHANK1   | 19 | 50661827  | 50719450  | -1 |
| ENSG00000197555 | 1.315000927 | 6.89859982   | 2.81E-05   | 0.00165602 | SIPA1L1  | 14 | 71320449  | 71741229  | 1  |
| ENSG00000105738 | 1.972667589 | 3.49290858   | 0.00021671 | 0.00679522 | SIPA1L3  | 19 | 37907228  | 38208372  | 1  |
| ENSG00000005020 | 1.815477114 | 3.283041019  | 0.00022789 | 0.00701982 | SKAP2    | 7  | 26667062  | 26995239  | -1 |
| ENSG00000157933 | 2.207973103 | 4.149836632  | 2.12E-05   | 0.00137291 | SKI      | 1  | 2228695   | 2310119   | 1  |
| ENSG00000140199 | 1.407099925 | 5.257220535  | 4.54E-05   | 0.00232462 | SLC12A6  | 15 | 34229996  | 34338060  | -1 |
| ENSG00000110446 | -2.63773598 | 2.348069339  | 0.00037773 | 0.00992424 | SLC15A3  | 11 | 60937083  | 60952530  | -1 |
| ENSG00000147100 | 1.631972149 | 5.79673252   | 7.07E-05   | 0.00314875 | SLC16A2  | X  | 74421461  | 74533917  | 1  |
| ENSG00000117479 | -1.80200576 | 4.515820281  | 0.00013211 | 0.00481674 | SLC19A2  | 1  | 169463909 | 169486003 | -1 |
| ENSG00000162383 | -8.82950364 | -1.259442171 | 1.43E-06   | 0.00019083 | SLC1A7   | 1  | 53087179  | 53142632  | -1 |
| ENSG00000089057 | 1.391533815 | 5.853034296  | 4.75E-05   | 0.00238277 | SLC23A2  | 20 | 4852356   | 5010293   | -1 |
| ENSG00000125648 | 1.542525628 | 4.508568976  | 8.12E-06   | 0.00067558 | SLC25A23 | 19 | 6436079   | 6465203   | -1 |
| ENSG00000164933 | -2.26052997 | 4.504771934  | 6.01E-05   | 0.00280813 | SLC25A32 | 8  | 103398635 | 103415189 | -1 |
| ENSG00000151729 | -1.10269517 | 6.415459536  | 0.00032896 | 0.00906384 | SLC25A4  | 4  | 185143241 | 185150382 | 1  |
| ENSG00000170385 | -2.12124761 | 7.002632531  | 1.34E-06   | 0.00183383 | SLC30A1  | 1  | 211571568 | 211578742 | 1  |
| ENSG00000176087 | 1.565164144 | 4.328388738  | 2.68E-05   | 0.00160175 | SLC35A4  | 5  | 140564456 | 140569103 | 1  |
| ENSG00000157593 | -1.33076642 | 5.940178556  | 4.37E-05   | 0.00227594 | SLC35B2  | 6  | 44254096  | 44257890  | -1 |
| ENSG00000157800 | -1.17450672 | 6.406915095  | 0.00028339 | 0.00815571 | SLC37A3  | 7  | 140293693 | 140404433 | -1 |
| ENSG00000104635 | -1.48540281 | 6.23792486   | 6.50E-05   | 0.00297087 | SLC39A14 | 8  | 22367249  | 22434129  | 1  |
| ENSG00000168003 | -1.4621449  | 7.374443281  | 0.00011279 | 0.0043607  | SLC3A2   | 11 | 62856102  | 62888875  | 1  |
| ENSG00000131389 | -1.69556027 | 4.40121635   | 0.00037208 | 0.00982131 | SLC6A6   | 3  | 14402576  | 14489349  | 1  |
| ENSG00000090020 | 2.206772272 | 1.312507985  | 0.00028223 | 0.00813947 | SLC9A1   | 1  | 27098815  | 27166981  | -1 |
| ENSG00000197818 | 1.086063211 | 4.627430937  | 0.00030101 | 0.0065434  | SLC9A8   | 20 | 49812713  | 49892242  | 1  |
| ENSG00000170365 | 2.19329414  | 5.464078598  | 8.55E-06   | 0.00069966 | SMAD1    | 4  | 145481194 | 145558079 | 1  |
| ENSG00000101665 | -2.25921951 | 2.768727841  | 8.81E-06   | 0.00071764 | SMAD7    | 18 | 48919853  | 48950711  | -1 |
| ENSG00000072501 | 1.26160737  | 6.780377388  | 0.00010342 | 0.00411203 | SMC1A    | X  | 53374149  | 53422728  | -1 |
| ENSG00000070366 | 1.329296709 | 5.305976589  | 2.19E-05   | 0.00140287 | SMG6     | 17 | 2059839   | 2303771   | -1 |
| ENSG00000116698 | 1.80938928  | 4.840041068  | 5.50E-05   | 0.00264248 | SMG7     | 1  | 183472216 | 183598246 | 1  |
| ENSG00000167447 | -1.07758095 | 5.704574779  | 0.000155   | 0.00539346 | SMG8     | 17 | 59209400  | 59215247  | 1  |
| ENSG00000256235 | -1.46984991 | 4.003651885  | 0.00026005 | 0.00775694 | SMIM3    | 5  | 150777946 | 150796734 | 1  |
| ENSG00000136699 | 1.114252046 | 4.584488443  | 0.00020873 | 0.00660937 | SMPD4    | 2  | 130151392 | 130182750 | -1 |
| ENSG00000144028 | 1.088545189 | 8.196444851  | 0.00012489 | 0.00464828 | SNRNP200 | 2  | 96274336  | 96305515  | -1 |
| ENSG00000077312 | 1.830048894 | 4.165105743  | 1.68E-05   | 0.00117212 | SNRPA    | 19 | 40750637  | 40765389  | 1  |
| ENSG00000125835 | -1.97288701 | 5.702424905  | 2.38E-05   | 0.00150112 | SNRPB    | 20 | 2461634   | 2470853   | -1 |
| ENSG00000143376 | 1.378922117 | 5.963710728  | 4.29E-05   | 0.00225799 | SNX27    | 1  | 151612065 | 151699091 | 1  |
| ENSG00000120833 | -1.16056108 | 5.523328463  | 0.00026509 | 0.00784521 | SOCS2    | 12 | 93569814  | 93583487  | 1  |
| ENSG00000171150 | -1.13366272 | 5.791052316  | 0.00025087 | 0.00754939 | SOCS5    | 2  | 46698952  | 46763129  | 1  |
| ENSG00000115904 | 1.797147834 | 5.8194492    | 0.00031747 | 0.00889883 | SOS1     | 2  | 38981396  | 39124345  | -1 |
| ENSG00000177732 | 2.794593524 | 3.657749776  | 1.91E-07   | 4.35E-05   | SOX12    | 20 | 325401    | 330224    | 1  |
| ENSG00000134532 | 2.238200843 | 6.351748515  | 2.39E-05   | 0.0015012  | SOX5     | 12 | 23529500  | 23951032  | -1 |
| ENSG00000125398 | 2.08849634  | 5.443749076  | 3.69E-05   | 0.00198983 | SOX9     | 17 | 72121020  | 72126420  | 1  |
| ENSG00000135899 | 2.878883905 | 1.420635123  | 7.26E-06   | 0.00062842 | SP110    | 2  | 230167293 | 230225729 | -1 |
| ENSG00000158792 | -3.04012988 | 3.532737754  | 8.65E-07   | 0.00013285 | SPATA2L  | 16 | 89696343  | 89701705  | -1 |
| ENSG00000128487 | 1.415434468 | 8.027835598  | 5.70E-05   | 0.0026985  | SPECC1   | 17 | 20009344  | 20319026  | 1  |
| ENSG00000072195 | 1.354657658 | 5.056220556  | 0.00010249 | 0.00409279 | SPEG     | 2  | 219434846 | 219498287 | 1  |
| ENSG00000176170 | -5.09287025 | 3.255663801  | 8.73E-08   | 2.53E-05   | SPHK1    | 17 | 76376584  | 76387860  | 1  |
| ENSG00000063176 | 1.398284318 | 3.478851582  | 9.39E-05   | 0.0038656  | SPHK2    | 19 | 48619291  | 48630717  | 1  |
| ENSG00000166145 | -5.97799387 | -1.498426022 | 7.91E-05   | 0.00344843 | SPINT1   | 15 | 40844018  | 40858207  | 1  |
| ENSG00000157837 | 1.350490349 | 4.624655978  | 0.00020623 | 0.00656355 | SPPL3    | 12 | 120762510 | 120904371 | -1 |
| ENSG00000203772 | 2.805603415 | 2.912491759  | 5.40E-08   | 1.70E-05   | SPRN     | 10 | 133420666 | 133424572 | -1 |
| ENSG00000137877 | -3.69176881 | -0.413774587 | 0.00023498 | 0.00718581 | SPTBNS   | 15 | 41848144  | 41894077  | -1 |
| ENSG00000179119 | -1.47256328 | 6.326291754  | 0.00020656 | 0.00656355 | SPTY2D1  | 11 | 18606401  | 18634791  | -1 |
| ENSG00000198911 | 1.525341961 | 6.430538556  | 3.12E-05   | 0.00177299 | SREBF2   | 22 | 41833079  | 41907308  | 1  |
| ENSG00000196935 | 2.142906249 | 5.057415562  | 2.43E-05   | 0.00150818 | SRGAP1   | 12 | 63844293  | 64162221  | 1  |
| ENSG00000266028 | 1.298091844 | 5.062804272  | 0.00013997 | 0.00501588 | SRGAP2   | 1  | 206203345 | 206464443 | 1  |
| ENSG00000133226 | 1.687922261 | 5.278449071  | 5.90E-05   | 0.00276328 | SRRM1    | 1  | 24631716  | 24673267  | 1  |
| ENSG00000167978 | 2.491288642 | 6.305919026  | 2.77E-05   | 0.0016325  | SRRM2    | 16 | 2752329   | 2772538   | 1  |
| ENSG00000176101 | -1.4113998  | 4.222523422  | 0.00030968 | 0.00874943 | SSNA1    | 9  | 137188647 | 137190370 | 1  |
| ENSG00000101638 | 3.549184637 | 3.008765149  | 4.87E-07   | 8.56E-05   | ST8IA5   | 18 | 46667821  | 46759257  | -1 |
| ENSG00000138378 | -5.68124095 | 1.713545108  | 7.79E-05   | 0.00340639 | STAT4    | 2  | 191029576 | 191151596 | -1 |
| ENSG00000159167 | -4.33840953 | 5.269528412  | 2.74E-07   | 5.79E-05   | STC1     | 8  | 23841915  | 23854807  | -1 |
| ENSG00000164543 | -2.36038568 | 5.390200924  | 1.04E-06   | 0.00014925 | STK17A   | 7  | 43582758  | 43626786  | 1  |
| ENSG00000107882 | 1.884499506 | 2.650830267  | 0.00026441 | 0.00783202 | SUFU     | 10 | 102503987 | 102633535 | 1  |
| ENSG00000165416 | 1.078666997 | 7.298816364  | 7.81E-05   | 0.00341012 | SUGT1    | 13 | 52652709  | 52700909  | 1  |
| ENSG00000148248 | -1.94807145 | 5.267512911  | 9.42E-05   | 0.00386974 | SURF4    | 9  | 133361449 | 133376166 | -1 |
| ENSG00000197283 | 2.137018215 | 2.72289205   | 0.00026611 | 0.00785617 | SYNGAP1  | 6  | 33420070  | 33457541  | 1  |
| ENSG00000078269 | -2.79660354 | 3.756377909  | 5.39E-05   | 0.00260918 | SYNJ2    | 6  | 157981887 | 158099176 | 1  |
| ENSG00000171992 | 2.34082133  | 4.008726311  | 0.00015496 | 0.00539346 | SYNPO    | 5  | 150601080 | 150659220 | 1  |
| ENSG00000173227 | -4.01780741 | 3.727337045  | 2.13E-05   | 0.001377   | SYT12    | 11 | 67006778  | 67050863  | 1  |
| ENSG00000157625 | 1.367096171 | 4.981406958  | 4.33E-06   | 0.0004445  | TAB3     | X  | 30827442  | 30975084  | -1 |
| ENSG00000138162 | 2.153852639 | 4.094198842  | 0.00029414 | 0.00838344 | TACC2    | 10 | 121989174 | 122254545 | 1  |
| ENSG00000120656 | -0.96550916 | 4.147091154  | 0.00021166 | 0.0066834  | TAF12    | 1  | 28589323  | 28643085  | -1 |
| ENSG00000122728 | -5.10262845 | -1.27094036  | 6.77E-05   | 0.00305769 | TAF1L    | 9  | 32629454  | 32635669  | -1 |
| ENSG00000170921 | 1.555388404 | 6.130683915  | 0.00025444 | 0.00763669 | TANC2    | 17 | 63009556  | 63427699  | 1  |
| ENSG00000120948 | 1.460316531 | 7.210814171  | 0.00017203 | 0.00581644 | TARDBP   | 1  | 11012344  | 11026420  | 1  |
| ENSG00000113407 | -1.50789008 | 7.677930352  | 2.31E-06   | 0.00027955 | TARS     | 5  | 33440696  | 33469539  | 1  |
| ENSG00000104946 | 2.275984724 | 2.906725637  | 1.95E-05   | 0.00129624 | TBC1D17  | 19 | 49877425  | 49888749  | 1  |
| ENSG00000106638 | -1.46951281 | 5.037975489  | 2.43E-05   | 0.00150818 | TBL2     | 7  | 73568932  | 73578791  | -1 |
| ENSG00000187079 | 1.445616997 | 7.782365202  | 0.00035612 | 0.00954862 | TEAD1    | 11 | 12674591  | 12944483  | 1  |

|                 |             |              |            |            |           |    |           |           |    |
|-----------------|-------------|--------------|------------|------------|-----------|----|-----------|-----------|----|
| ENSG00000109927 | 2.212667518 | 2.007606753  | 2.69E-05   | 0.00160448 | TECTA     | 11 | 121101173 | 121191493 | 1  |
| ENSG00000162851 | -1.39043037 | 3.98281665   | 2.05E-05   | 0.00134388 | TFB2M     | 1  | 246540560 | 246566324 | -1 |
| ENSG00000105825 | -2.1410476  | 10.45951111  | 8.04E-05   | 0.00348259 | TFPI2     | 7  | 93885397  | 93890991  | -1 |
| ENSG00000131931 | -1.23053116 | 4.320319574  | 0.00027262 | 0.00799627 | THAP1     | 8  | 42836674  | 42843325  | -1 |
| ENSG00000184436 | -1.65544119 | 4.252633059  | 0.0001923  | 0.0062885  | THAP7     | 22 | 20999104  | 21002196  | -1 |
| ENSG00000137801 | -4.00647907 | 8.520912674  | 1.39E-07   | 3.53E-05   | THBS1     | 15 | 39581079  | 39599466  | 1  |
| ENSG00000169231 | -1.69436726 | 5.006890992  | 4.22E-06   | 0.00043899 | THBS3     | 1  | 155195588 | 155209051 | -1 |
| ENSG00000131652 | -2.32177103 | 3.101668911  | 6.97E-05   | 0.00313033 | THOC6     | 16 | 3024027   | 3027755   | 1  |
| ENSG00000164296 | -2.14781219 | 3.727747895  | 8.30E-06   | 0.00068343 | TIGD6     | 5  | 149993118 | 150001167 | -1 |
| ENSG00000104067 | 1.706426538 | 6.214338742  | 0.00017235 | 0.00582023 | TJP1      | 15 | 29699367  | 29968865  | -1 |
| ENSG00000171914 | 1.86772183  | 5.76810808   | 8.59E-05   | 0.00361584 | TLN2      | 15 | 62390526  | 62844631  | 1  |
| ENSG00000136869 | -3.06668849 | 5.487077242  | 4.86E-05   | 0.00242454 | TLR4      | 9  | 117704332 | 117716871 | 1  |
| ENSG00000086598 | -1.02902506 | 8.221307532  | 0.00012208 | 0.00459939 | TMED2     | 12 | 123584531 | 123598577 | 1  |
| ENSG00000158604 | -0.98284029 | 6.762964899  | 0.00031038 | 0.00875793 | TMED4     | 7  | 44577894  | 44582287  | -1 |
| ENSG00000075568 | 1.828431411 | 5.32154546   | 1.02E-06   | 0.00014769 | TMEM131   | 2  | 97756333  | 97995891  | -1 |
| ENSG00000164112 | -4.24520029 | 1.476920812  | 1.69E-07   | 4.04E-05   | TMEM155   | 4  | 121758933 | 121765427 | -1 |
| ENSG00000198792 | 1.552190301 | 4.517133952  | 0.00014165 | 0.00504424 | TMEM184B  | 22 | 38219291  | 38273034  | -1 |
| ENSG00000168701 | -1.38209083 | 4.394306314  | 9.46E-05   | 0.00387791 | TMEM208   | 16 | 67227103  | 67229278  | 1  |
| ENSG00000205544 | -1.47165984 | 4.168665068  | 2.98E-05   | 0.00172804 | TMEM256   | 17 | 7402975   | 7404137   | -1 |
| ENSG00000176142 | -1.62995797 | 4.742739913  | 7.59E-05   | 0.00333947 | TMEM39A   | 3  | 119429500 | 119468830 | -1 |
| ENSG00000196187 | 1.45422069  | 4.517223856  | 0.00016352 | 0.00560061 | TMEM63A   | 1  | 225845536 | 225882369 | -1 |
| ENSG00000120889 | -1.36681133 | 6.394080942  | 0.00030438 | 0.00863166 | TNFRSF10B | 8  | 23020133  | 23069179  | -1 |
| ENSG00000006327 | -7.38101945 | 6.084876982  | 2.98E-12   | 1.65E-08   | TNFRSF12A | 16 | 3018445   | 3022383   | 1  |
| ENSG00000125657 | -8.46038114 | -1.221232636 | 3.20E-06   | 0.00035512 | TNFSF9    | 19 | 6530999   | 6535928   | 1  |
| ENSG00000173273 | 1.126022207 | 7.22677347   | 0.00012606 | 0.00467136 | TNKS      | 7  | 9555914   | 9782346   | 1  |
| ENSG00000000005 | -6.73970173 | 1.706510637  | 1.72E-05   | 0.0011915  | TNMD      | X  | 100584802 | 100599885 | 1  |
| ENSG00000159173 | -12.0136308 | -0.769397837 | 1.70E-09   | 1.38E-06   | TNNI1     | 1  | 201403768 | 201429866 | -1 |
| ENSG00000182095 | 1.894773675 | 5.026765717  | 5.11E-06   | 0.00049111 | TNRC18    | 7  | 5306790   | 5425414   | -1 |
| ENSG00000100354 | 1.350443689 | 7.530498879  | 0.0002213  | 0.00468835 | TNRC6B    | 22 | 40044817  | 40335808  | 1  |
| ENSG00000132773 | -2.39660624 | 3.528197309  | 2.44E-06   | 0.00029134 | TOE1      | 1  | 45339670  | 45343975  | 1  |
| ENSG00000136816 | -1.05932231 | 5.003982872  | 0.00028106 | 0.00811966 | TOR1B     | 9  | 129803153 | 129811281 | 1  |
| ENSG00000078804 | 2.39315257  | 2.912258341  | 4.62E-06   | 0.00046003 | TP53INP2  | 20 | 34704290  | 34713439  | 1  |
| ENSG00000196655 | -1.07475183 | 4.543669934  | 0.00036267 | 0.00964798 | TRAPPC4   | 11 | 119018432 | 119025454 | 1  |
| ENSG00000170855 | -1.27096149 | 4.598250086  | 7.82E-05   | 0.00341012 | TRIAP1    | 12 | 120443961 | 120446412 | -1 |
| ENSG00000101255 | -2.20815405 | 4.408619413  | 6.99E-05   | 0.00313207 | TRIB3     | 20 | 362835    | 397559    | 1  |
| ENSG00000204713 | -1.26495384 | 4.044025494  | 0.00018064 | 0.00600585 | TRIM27    | 6  | 28903002  | 28923989  | -1 |
| ENSG00000171206 | 1.531753027 | 4.654197465  | 0.00010968 | 0.00429402 | TRIM8     | 10 | 102644496 | 102658407 | 1  |
| ENSG00000173113 | -1.32166269 | 6.189536868  | 1.06E-05   | 0.00082943 | TRMT112   | 11 | 64316460  | 64318084  | -1 |
| ENSG00000165699 | 1.113449388 | 6.652975977  | 0.00032175 | 0.00895366 | TSC1      | 9  | 132891348 | 132944633 | -1 |
| ENSG00000104522 | -1.26552668 | 4.342774296  | 0.000153   | 0.00534863 | TSTA3     | 8  | 143612618 | 143618048 | -1 |
| ENSG00000100154 | 1.528723882 | 5.800218427  | 2.03E-05   | 0.00133758 | TTC28     | 22 | 27978014  | 28679865  | -1 |
| ENSG00000105849 | -1.07631492 | 5.234445052  | 0.00034612 | 0.00935419 | TWISTNB   | 7  | 19695462  | 19709087  | -1 |
| ENSG00000184470 | -1.90200789 | 3.853472778  | 6.33E-05   | 0.00291839 | TXNRD2    | 22 | 19875517  | 19941992  | -1 |
| ENSG00000117143 | -1.53544495 | 5.498146549  | 4.31E-06   | 0.00044445 | UAP1      | 1  | 162561506 | 162599842 | 1  |
| ENSG00000150991 | -1.14232551 | 10.12023517  | 4.79E-05   | 0.00240368 | UBC       | 12 | 124911604 | 124917368 | -1 |
| ENSG00000078967 | 1.677392566 | 3.997427392  | 0.00033176 | 0.009104   | UBE2D4    | 7  | 43926438  | 43956136  | 1  |
| ENSG00000130725 | -1.77115176 | 5.015563946  | 6.31E-05   | 0.00291795 | UBE2M     | 19 | 58555712  | 58558960  | -1 |
| ENSG00000244687 | 2.135495262 | 5.487930261  | 2.39E-06   | 0.00028817 | UBE2V1    | 20 | 50081124  | 50115959  | -1 |
| ENSG00000130939 | 1.544101052 | 5.370765772  | 1.17E-05   | 0.00089293 | UBE4B     | 1  | 10032832  | 10181239  | 1  |
| ENSG00000120686 | -1.00943801 | 7.62734126   | 0.00027836 | 0.00809396 | UFM1      | 13 | 38349849  | 38363619  | 1  |
| ENSG00000132478 | 0.953231375 | 4.63480785   | 0.00017533 | 0.00589258 | UNK       | 17 | 75784771  | 75825799  | 1  |
| ENSG00000059145 | 1.479111356 | 3.550078908  | 8.28E-05   | 0.00354495 | UNKL      | 16 | 1363205   | 1414751   | -1 |
| ENSG00000140740 | -0.94760674 | 7.159636045  | 0.00023205 | 0.00711456 | UQCRC2    | 16 | 21952660  | 21983660  | 1  |
| ENSG00000147679 | -1.32927848 | 5.113142571  | 3.85E-05   | 0.002062   | UTP23     | 8  | 116766503 | 116849463 | 1  |
| ENSG00000162738 | 2.028847107 | 6.239615719  | 2.03E-05   | 0.00133848 | VANGL2    | 1  | 160400586 | 160428678 | 1  |
| ENSG00000071246 | 1.638069715 | 5.540591122  | 6.94E-05   | 0.00313033 | VASH1     | 14 | 76762189  | 76783015  | 1  |
| ENSG00000170162 | -8.36933616 | -1.179536984 | 3.30E-06   | 0.00036381 | VGLL2     | 6  | 117265558 | 117273565 | 1  |
| ENSG00000131871 | -1.30598614 | 5.976787901  | 3.94E-05   | 0.0021039  | VIMP      | 15 | 101270817 | 101277500 | -1 |
| ENSG00000132549 | 1.567397386 | 7.079373882  | 2.07E-05   | 0.00135428 | VPS13B    | 8  | 99013266  | 99877580  | 1  |
| ENSG00000048707 | 1.280378387 | 7.322578987  | 0.00011991 | 0.00455798 | VPS13D    | 1  | 12230067  | 12512047  | 1  |
| ENSG00000134258 | -6.49118672 | -0.121560742 | 1.02E-08   | 5.23E-06   | VTCN1     | 1  | 117143587 | 117210960 | -1 |
| ENSG00000158195 | 1.80856179  | 5.919807451  | 6.32E-05   | 0.00291839 | WASF2     | 1  | 27404226  | 27490158  | -1 |
| ENSG00000106299 | 1.39262751  | 5.676357205  | 0.00031824 | 0.00890561 | WASL      | 7  | 123681935 | 123749067 | -1 |
| ENSG00000084463 | 1.931293983 | 5.578693239  | 1.51E-06   | 0.00019722 | WBP11     | 12 | 14784579  | 14803540  | -1 |
| ENSG00000132471 | 1.481964297 | 4.248578466  | 0.000236   | 0.00720427 | WBP2      | 17 | 75845699  | 75856507  | -1 |
| ENSG00000139668 | 1.205196895 | 6.280012005  | 3.07E-05   | 0.00175391 | WDFY2     | 13 | 51584455  | 51767707  | 1  |
| ENSG00000163625 | 1.332197293 | 8.14717875   | 6.25E-05   | 0.0029002  | WDFY3     | 4  | 84669610  | 84966391  | -1 |
| ENSG00000071127 | -1.2660763  | 8.503988808  | 4.86E-05   | 0.00242454 | WDR1      | 4  | 10074339  | 10116949  | -1 |
| ENSG00000105583 | -1.05269178 | 6.109606779  | 3.62E-05   | 0.00196798 | WDR83OS   | 19 | 12668071  | 12671356  | -1 |
| ENSG00000115935 | 1.684336101 | 3.803334343  | 0.00032201 | 0.00895366 | WIPF1     | 2  | 174559572 | 174682916 | -1 |
| ENSG00000001451 | 2.173369522 | 3.525207433  | 6.36E-05   | 0.00292456 | WIZ       | 19 | 15419980  | 15449951  | -1 |
| ENSG00000060237 | 1.771025437 | 6.780794416  | 2.61E-06   | 0.00030661 | WNK1      | 12 | 752593    | 911452    | 1  |
| ENSG00000002745 | -7.51435902 | 0.136775241  | 0.00016862 | 0.00574375 | WNT16     | 7  | 121325367 | 121341104 | 1  |
| ENSG00000018408 | 1.356617531 | 7.556339966  | 9.96E-05   | 0.00399458 | WWTR1     | 3  | 149517235 | 149736714 | -1 |
| ENSG00000132530 | -8.59732483 | -1.363366831 | 0.00018617 | 0.00614751 | XAF1      | 17 | 6755447   | 6775647   | 1  |
| ENSG00000130733 | -1.77033418 | 4.951795849  | 1.31E-06   | 0.00018109 | YIPF2     | 19 | 10922185  | 10928681  | -1 |
| ENSG00000145817 | -1.45002467 | 6.418839559  | 6.61E-05   | 0.00300448 | YIPF5     | 5  | 144158159 | 144170714 | -1 |
| ENSG00000196449 | -1.80633842 | 3.972695244  | 0.00010581 | 0.0041763  | YRDC      | 1  | 37802944  | 37808185  | -1 |
| ENSG00000108953 | 1.97097468  | 7.459818873  | 2.57E-06   | 0.00030234 | YWHAE     | 17 | 1344272   | 1400378   | -1 |
| ENSG00000181722 | 1.212624067 | 5.790657588  | 0.00015574 | 0.00539927 | ZBTB20    | 3  | 114338094 | 115147271 | -1 |
| ENSG00000178951 | 2.117987293 | 2.658497165  | 9.28E-06   | 0.00074335 | ZBTB7A    | 19 | 4044364   | 4066945   | -1 |



|                 |             |             |            |            |          |    |           |           |    |
|-----------------|-------------|-------------|------------|------------|----------|----|-----------|-----------|----|
| ENSG00000123200 | 2.008096879 | 6.863099064 | 3.08E-05   | 0.00175784 | ZC3H13   | 13 | 45954465  | 46052759  | -1 |
| ENSG00000130749 | 1.868799284 | 4.086240517 | 5.83E-05   | 0.0027395  | ZC3H4    | 19 | 47064187  | 47113752  | -1 |
| ENSG00000177054 | -1.46825774 | 5.01178103  | 8.60E-05   | 0.00361584 | ZDHHHC13 | 11 | 19117099  | 19176422  | 1  |
| ENSG00000169946 | 2.470211094 | 2.53617114  | 1.48E-06   | 0.00019501 | ZFPM2    | 8  | 104590733 | 105804532 | 1  |
| ENSG00000072121 | 1.315023504 | 6.087016948 | 2.48E-05   | 0.00152378 | ZFYVE26  | 14 | 67727374  | 67816590  | -1 |
| ENSG00000155256 | -2.17805718 | 5.435230079 | 2.60E-08   | 9.58E-06   | ZFYVE27  | 10 | 97737121  | 97760907  | 1  |
| ENSG00000101040 | 2.014972103 | 6.23587393  | 6.20E-06   | 0.00056397 | ZMYND8   | 20 | 47209214  | 47356889  | -1 |
| ENSG00000006194 | -0.89289966 | 5.728691758 | 0.00035691 | 0.00955464 | ZNF263   | 16 | 3263800   | 3301401   | 1  |
| ENSG00000166526 | -0.87586756 | 6.139458952 | 0.00034159 | 0.00928366 | ZNF3     | 7  | 100064033 | 100082548 | -1 |
| ENSG00000171467 | 1.793224687 | 5.649084654 | 1.72E-05   | 0.0011915  | ZNF318   | 6  | 43307134  | 43369478  | -1 |
| ENSG00000160094 | 1.68239431  | 3.903498028 | 6.78E-06   | 0.00060402 | ZNF362   | 1  | 33256545  | 33300719  | 1  |
| ENSG00000126746 | 1.642232459 | 4.84057562  | 1.10E-05   | 0.000852   | ZNF384   | 12 | 6666477   | 6689572   | -1 |
| ENSG00000148143 | 1.53928571  | 7.796437836 | 0.00013117 | 0.00480318 | ZNF462   | 9  | 106863097 | 107013634 | 1  |
| ENSG00000204604 | -1.45750553 | 4.832209405 | 0.00017427 | 0.00586269 | ZNF468   | 19 | 52838008  | 52857649  | -1 |
| ENSG00000074657 | 1.400138248 | 7.461574253 | 9.33E-06   | 0.00074528 | ZNF532   | 18 | 58862600  | 58986480  | 1  |
| ENSG00000167962 | 1.178171428 | 3.876149697 | 0.00028036 | 0.00810969 | ZNF598   | 16 | 1997654   | 2009823   | -1 |
| ENSG00000173545 | -1.5086097  | 4.797768514 | 0.00025635 | 0.00767364 | ZNF622   | 5  | 16451519  | 16465792  | -1 |
| ENSG00000198740 | 1.410830663 | 5.343311545 | 8.25E-05   | 0.00353867 | ZNF652   | 17 | 49289206  | 49362473  | -1 |
| ENSG00000164684 | 1.522594024 | 5.651904787 | 4.38E-06   | 0.00044571 | ZNF704   | 8  | 80628451  | 80874781  | -1 |
| ENSG00000151612 | 1.810562803 | 4.907036524 | 4.23E-06   | 0.00043899 | ZNF827   | 4  | 145757627 | 145938635 | -1 |
| ENSG00000066379 | -1.53903015 | 2.616672947 | 0.00018828 | 0.00618702 | ZNRD1    | 6  | 30058899  | 30064909  | 1  |
