# Supplementary material for: THC exposure of human iPSC neurons impacts genes associated with neuropsychiatric disorders
Source: PubMed Central journal article supplement (PMC5915454; doi:10.1038/s41398-018-0137-3), 2018-04-25
Supplement: 41398_2018_137_MOESM5_ESM.pdf [file 41398_2018_137_MOESM5_ESM.pdf]

**Supplementary Table 4: Glutamate receptor and mitochondrial associated genes altered in response to acute or chronic doses of THC**

| Mitochondrial genes | Acute THC dose | Chronic THC doses |
|---------------------|----------------|-------------------|
| MT-ATP6             | ✓              |                   |
| UQCRBP1             | ✓              |                   |
| SDHA                | ✓              |                   |
| DDIT4               | ✓              |                   |
| DDX28               |                | ✓                 |
| DNAJA3              |                | ✓                 |
| HAX1                |                | ✓                 |
| KIAA1683            |                | ✓                 |
| TRIAP1              |                | ✓                 |
| RARS                |                | ✓                 |
| CS                  |                | ✓                 |
| CYB5R3              |                | ✓                 |
| CYC1                |                | ✓                 |
| DIABLO              |                | ✓                 |
| GBF1                |                | ✓                 |
| HADH                |                | ✓                 |
| MRPL28              |                | ✓                 |
| MRPS18B             |                | ✓                 |
| PTRF                |                | ✓                 |
| SDHB                |                | ✓                 |
| UQCRC2              |                | ✓                 |
| YRDC                |                | ✓                 |
| MARS2               |                | ✓                 |
| MAVS                |                | ✓                 |
| SLC25A4             |                | ✓                 |
| MRPL17              |                | ✓                 |
| MT-ND4              | ✓              | ✓                 |
| MT-CO1              | ✓              | ✓                 |
| MT-CO2              | ✓              | ✓                 |
| MT-CO3              | ✓              | ✓                 |
| MT-ND4L             | ✓              | ✓                 |
| ADPRHL2             | ✓              | ✓                 |
| GRPEL1              | ✓              | ✓                 |
| ALDH18A1            | ✓              | ✓                 |
| COQ10B              | ✓              | ✓                 |
| COX7A2              | ✓              | ✓                 |
| DMPK                | ✓              | ✓                 |
| HAGH                | ✓              | ✓                 |
| MTHFD2              | ✓              | ✓                 |
| MGST1               | ✓              | ✓                 |
| MTFP1               | ✓              | ✓                 |

|                                 |   |   |
|---------------------------------|---|---|
| MRPL14                          | ✓ | ✓ |
| MRPL49                          | ✓ | ✓ |
| MRPL54                          | ✓ | ✓ |
| MRPS7                           | ✓ | ✓ |
| PMAIP1                          | ✓ | ✓ |
| PDK2                            | ✓ | ✓ |
| RGS2                            | ✓ | ✓ |
| RPS3                            | ✓ | ✓ |
| SGK1                            | ✓ | ✓ |
| SLC25A32                        | ✓ | ✓ |
| TFB2M                           | ✓ | ✓ |
|                                 |   |   |
| <b>Glutamate receptor genes</b> |   |   |
|                                 |   |   |
| GRID2                           | ✓ | ✓ |
| GRIK1                           | ✓ | ✓ |
