# Supplementary material for: THC exposure of human iPSC neurons impacts genes associated with neuropsychiatric disorders
Source: PubMed Central journal article supplement (PMC5915454; doi:10.1038/s41398-018-0137-3), 2018-04-25
Supplement: 41398_2018_137_MOESM6_ESM.pdf [file 41398_2018_137_MOESM6_ESM.pdf]

**Supplementary Table 5: Genes associated with epigenetic regulation altered in response to acute or chronic doses of THC**

| Gene class                   | Acute THC dose | Chronic THC doses |
|------------------------------|----------------|-------------------|
| <b>Epigenetic regulation</b> |                |                   |
| CBX5                         | ✓              | ✓                 |
| DNMT1                        | ✓              | ✓                 |
| GADD45B                      | ✓              | ✓                 |
| APOBEC3C                     | ✓              | ✓                 |
| SETD1A                       |                | ✓                 |
| SETD5                        |                | ✓                 |
| CBX6                         |                | ✓                 |
| KMT2C                        |                | ✓                 |
| NCOA6                        |                | ✓                 |
| MECP2                        |                | ✓                 |
| MBD5                         |                | ✓                 |
| CECR2                        |                | ✓                 |
| MYSM1                        |                | ✓                 |
| PHF21A                       |                | ✓                 |
| BPTF                         |                | ✓                 |
| BAZ2A                        |                | ✓                 |
| FAM175A                      |                | ✓                 |
| FOXA1                        |                | ✓                 |
| KAT6B                        |                | ✓                 |
| KMT2A                        |                | ✓                 |
| LOXL2                        |                | ✓                 |
