# Supplementary material for: THC exposure of human iPSC neurons impacts genes associated with neuropsychiatric disorders
Source: PubMed Central journal article supplement (PMC5915454; doi:10.1038/s41398-018-0137-3), 2018-04-25
Supplement: 41398_2018_137_MOESM7_ESM.pdf [file 41398_2018_137_MOESM7_ESM.pdf]

Supplementary Table 6: Network analyses (Enrichment map pipeline in Cytoscape)

| Group Name                                                                                   | P-value  | FDR_qvalue |
|----------------------------------------------------------------------------------------------|----------|------------|
| GTPASE ACTIVATOR ACTIVITY                                                                    | 7.37E-04 | 0.018338   |
| TELENCEPHALON DEVELOPMENT                                                                    | 2.50E-04 | 0.0079216  |
| POSITIVE REGULATION OF NITROGEN COMPOUND METABOLIC PROCESS                                   | 3.60E-09 | 3.46E-07   |
| CHORDATE EMBRYONIC DEVELOPMENT                                                               | 1.80E-06 | 1.04E-04   |
| CHROMOSOME                                                                                   | 2.81E-06 | 1.49E-04   |
| REGULATION OF CELLULAR METABOLIC PROCESS                                                     | 1.47E-10 | 2.63E-08   |
| RNA POLYMERASE II TRANSCRIPTION FACTOR ACTIVITY                                              | 1.78E-06 | 1.04E-04   |
| REGULATION OF NUCLEOBASE, NUCLEOSIDE, NUCLEOTIDE AND NUCLEIC ACID METABOLIC PROCESS          | 2.53E-11 | 7.50E-09   |
| POSITIVE REGULATION OF TRANSCRIPTION, DNA-DEPENDENT                                          | 6.75E-10 | 8.85E-08   |
| RENAL SYSTEM DEVELOPMENT                                                                     | 6.94E-04 | 0.018106   |
| NEGATIVE REGULATION OF MACROMOLECULE METABOLIC PROCESS                                       | 1.19E-10 | 2.23E-08   |
| CHROMATIN REMODELING                                                                         | 6.84E-04 | 0.018106   |
| NEGATIVE REGULATION OF MACROMOLECULE BIOSYNTHETIC PROCESS                                    | 9.55E-12 | 5.37E-09   |
| PROTEIN DOMAIN SPECIFIC BINDING                                                              | 7.14E-04 | 0.018106   |
| POSITIVE REGULATION OF TRANSCRIPTION                                                         | 2.44E-09 | 2.66E-07   |
| CELL CYCLE                                                                                   | 7.60E-06 | 3.66E-04   |
| NEGATIVE REGULATION OF BIOSYNTHETIC PROCESS                                                  | 5.67E-11 | 1.17E-08   |
| EMBRYONIC DEVELOPMENT ENDING IN BIRTH OR EGG HATCHING                                        | 2.27E-06 | 1.26E-04   |
| REGULATION OF CELLULAR BIOSYNTHETIC PROCESS                                                  | 2.11E-10 | 3.62E-08   |
| REGULATION OF CELLULAR COMPONENT ORGANIZATION                                                | 1.63E-04 | 0.0054743  |
| TISSUE MORPHOGENESIS                                                                         | 2.10E-05 | 9.19E-04   |
| CONDENSIN COMPLEX                                                                            | 7.04E-04 | 0.018106   |
| CHROMATIN ORGANIZATION                                                                       | 1.50E-06 | 8.95E-05   |
| NEGATIVE REGULATION OF TRANSCRIPTION                                                         | 4.31E-11 | 9.41E-09   |
| KINETOCHORE                                                                                  | 9.19E-05 | 0.0034439  |
| NEGATIVE REGULATION OF NUCLEOBASE, NUCLEOSIDE, NUCLEOTIDE AND NUCLEIC ACID METABOLIC PROCESS | 2.67E-11 | 7.50E-09   |
| PRIMARY NEURAL TUBE FORMATION                                                                | 1.69E-04 | 0.005622   |
| DNA BINDING                                                                                  | 4.70E-08 | 3.56E-06   |
| POSITIVE REGULATION OF BIOSYNTHETIC PROCESS                                                  | 2.90E-07 | 1.87E-05   |
| PROXIMAL/DISTAL PATTERN FORMATION                                                            | 6.95E-04 | 0.018106   |
| CHROMOSOME ORGANIZATION                                                                      | 3.03E-09 | 2.98E-07   |
| POSITIVE REGULATION OF CELLULAR COMPONENT ORGANIZATION                                       | 1.92E-04 | 0.0063463  |
| LIMB DEVELOPMENT                                                                             | 7.53E-04 | 0.018508   |
| DNA CONFORMATION CHANGE                                                                      | 7.88E-04 | 0.019128   |
| CHROMOSOMAL PART                                                                             | 4.29E-07 | 2.72E-05   |
| NEGATIVE REGULATION OF CELLULAR METABOLIC PROCESS                                            | 1.01E-09 | 1.13E-07   |
| MRNA METABOLIC PROCESS                                                                       | 7.67E-04 | 0.018735   |
| NEGATIVE REGULATION OF TRANSCRIPTION FROM RNA POLYMERASE II PROMOTER                         | 2.74E-09 | 2.84E-07   |
| M PHASE                                                                                      | 3.69E-04 | 0.011264   |
| REGULATION OF SIGNALING PATHWAY                                                              | 1.38E-04 | 0.0047691  |
| TRANSCRIPTION REGULATOR ACTIVITY                                                             | 2.17E-12 | 1.71E-09   |
| TRANSCRIPTION COACTIVATOR ACTIVITY                                                           | 4.05E-06 | 2.07E-04   |
| FOREBRAIN DEVELOPMENT                                                                        | 1.10E-04 | 0.0038569  |
| DNA METABOLIC PROCESS                                                                        | 7.48E-05 | 0.0028565  |
| CENTRAL NERVOUS SYSTEM DEVELOPMENT                                                           | 7.35E-06 | 3.61E-04   |
| REGULATION OF CHONDROCYTE DIFFERENTIATION                                                    | 9.72E-04 | 0.022755   |
| CHROMOSOME SEGREGATION                                                                       | 2.07E-05 | 9.16E-04   |
| SULFURIC ESTER HYDROLASE ACTIVITY                                                            | 1.28E-05 | 5.92E-04   |
| NUCLEAR PART                                                                                 | 2.15E-07 | 1.43E-05   |
| REGULATION OF MACROMOLECULE METABOLIC PROCESS                                                | 4.56E-10 | 6.48E-08   |
| REGULATION OF RNA METABOLIC PROCESS                                                          | 1.50E-08 | 1.20E-06   |
| REGULATION OF TRANSCRIPTION FROM RNA POLYMERASE II PROMOTER                                  | 3.69E-10 | 6.05E-08   |
| NUCLEIC ACID BINDING                                                                         | 8.94E-10 | 1.11E-07   |
| REGULATION OF BIOSYNTHETIC PROCESS                                                           | 3.89E-10 | 6.11E-08   |
| KAINATE SELECTIVE GLUTAMATE RECEPTOR ACTIVITY                                                | 7.04E-04 | 0.018106   |
| SPLICEOSOMAL COMPLEX                                                                         | 6.40E-04 | 0.017483   |
| CYTOSKELETAL PROTEIN BINDING                                                                 | 5.20E-04 | 0.015023   |
| MORPHOGENESIS OF AN EPITHELIUM                                                               | 2.23E-05 | 9.53E-04   |
| ORGANELLE ORGANIZATION                                                                       | 1.13E-06 | 6.82E-05   |
| POSITIVE REGULATION OF NUCLEOBASE, NUCLEOSIDE, NUCLEOTIDE AND NUCLEIC ACID METABOLIC PROCESS | 8.78E-09 | 7.68E-07   |
| CELL                                                                                         | 7.18E-04 | 0.018106   |
| CELL PART                                                                                    | 7.09E-04 | 0.018106   |
| CHROMATIN MODIFICATION                                                                       | 2.05E-05 | 9.14E-04   |
| DNA DAMAGE RESPONSE, SIGNAL TRANSDUCTION                                                     | 1.37E-05 | 6.28E-04   |
| REGULATION OF MACROMOLECULE BIOSYNTHETIC PROCESS                                             | 4.40E-10 | 6.48E-08   |
| UROGENITAL SYSTEM DEVELOPMENT                                                                | 2.38E-05 | 0.0010078  |
| HINDGUT MORPHOGENESIS                                                                        | 7.04E-04 | 0.018106   |
| TRANSCRIPTION ACTIVATOR ACTIVITY                                                             | 1.73E-07 | 1.20E-05   |
| REGIONALIZATION                                                                              | 9.87E-05 | 0.0035603  |
| EMBRYONIC EPITHELIAL TUBE FORMATION                                                          | 8.09E-04 | 0.019511   |
| BETA-CATENIN BINDING                                                                         | 2.37E-06 | 1.29E-04   |
| VINCULIN BINDING                                                                             | 1.40E-04 | 0.0047869  |
| CELL CYCLE PROCESS                                                                           | 7.99E-05 | 0.0030198  |
| TRANSCRIPTION COFACTOR ACTIVITY                                                              | 2.44E-07 | 1.60E-05   |
| POSITIVE REGULATION OF RNA METABOLIC PROCESS                                                 | 9.93E-10 | 1.13E-07   |
| CELL CYCLE PHASE                                                                             | 8.45E-04 | 0.020269   |
| BRAIN DEVELOPMENT                                                                            | 2.55E-04 | 0.0080325  |
| DNA REPLICATION                                                                              | 5.91E-05 | 0.0023031  |
| NERVOUS SYSTEM DEVELOPMENT                                                                   | 1.02E-04 | 0.0036129  |
| REGULATION OF GENE EXPRESSION                                                                | 2.98E-09 | 2.98E-07   |
| REGULATION OF TRANSCRIPTION                                                                  | 6.44E-10 | 8.74E-08   |
| NEGATIVE REGULATION OF GENE EXPRESSION                                                       | 5.83E-12 | 3.82E-09   |
| NUCLEOBASE, NUCLEOSIDE, NUCLEOTIDE AND NUCLEIC ACID METABOLIC PROCESS                        | 9.58E-05 | 0.0034886  |
| SPINAL CORD PATTERNING                                                                       | 7.13E-04 | 0.018106   |
| SMOOTHENED SIGNALING PATHWAY                                                                 | 5.53E-04 | 0.015509   |

|                                                                      |           |           |
|----------------------------------------------------------------------|-----------|-----------|
| NEGATIVE REGULATION OF RNA METABOLIC PROCESS                         | 2.51E-11  | 7.50E-09  |
| REGULATION OF GENE EXPRESSION, EPIGENETIC                            | 9.62E-04  | 0.022646  |
| TUBE CLOSURE                                                         | 9.42E-05  | 0.0034632 |
| TRANSCRIPTION FACTOR BINDING                                         | 7.92E-09  | 7.08E-07  |
| ACTIN BINDING                                                        | 2.60E-04  | 0.0081052 |
| CHROMOSOME, CENTROMERIC REGION                                       | 6.33E-06  | 3.15E-04  |
| ANTERIOR/POSTERIOR PATTERN FORMATION                                 | 1.33E-04  | 0.0046259 |
| DNA METHYLATION                                                      | 2.30E-04  | 0.00734   |
| REGULATION OF METABOLIC PROCESS                                      | 9.05E-10  | 1.11E-07  |
| EMBRYONIC APPENDAGE MORPHOGENESIS                                    | 6.75E-04  | 0.018106  |
| REGULATION OF TRANSCRIPTION, DNA-DEPENDENT                           | 2.73E-08  | 2.10E-06  |
| NUCLEOPLASM                                                          | 2.10E-06  | 1.18E-04  |
| NEURAL TUBE CLOSURE                                                  | 9.42E-05  | 0.0034632 |
| NUCLEIC ACID METABOLIC PROCESS                                       | 9.02E-06  | 4.27E-04  |
| NUCLEOPLASM PART                                                     | 3.29E-06  | 1.73E-04  |
| REGULATION OF CELL DEVELOPMENT                                       | 4.06E-05  | 0.0016282 |
| TRANSCRIPTION REPRESSOR ACTIVITY                                     | 2.59E-05  | 0.0010883 |
| NUCLEUS                                                              | 5.64E-17  | 2.22E-13  |
| ENZYME BINDING                                                       | 1.02E-04  | 0.0036129 |
| EMBRYONIC DEVELOPMENT                                                | 3.40E-05  | 0.0013776 |
| REGULATION OF PRIMARY METABOLIC PROCESS                              | 3.93E-11  | 9.19E-09  |
| CELLULAR COMPONENT ORGANIZATION                                      | 1.21E-05  | 5.69E-04  |
| POSITIVE REGULATION OF TRANSCRIPTION FROM RNA POLYMERASE II PROMOTER | 1.27E-07  | 9.10E-06  |
| RNA SPLICING, VIA TRANSESTERIFICATION REACTIONS                      | 4.95E-04  | 0.014415  |
| NEURAL TUBE FORMATION                                                | 5.31E-04  | 0.015247  |
| NEURAL TUBE DEVELOPMENT                                              | 2.69E-05  | 0.0011015 |
| PATTERN SPECIFICATION PROCESS                                        | 4.81E-05  | 0.0019107 |
| KIDNEY DEVELOPMENT                                                   | 5.39E-04  | 0.015374  |
| EPITHELIAL TUBE MORPHOGENESIS                                        | 2.21E-05  | 9.53E-04  |
| TUBE DEVELOPMENT                                                     | 2.62E-05  | 0.0010853 |
| CELL FATE COMMITMENT                                                 | 5.01E-05  | 0.0019711 |
| APPENDAGE DEVELOPMENT                                                | 7.53E-04  | 0.018508  |
| REGULATION OF DNA METABOLIC PROCESS                                  | 4.46E-04  | 0.013383  |
| SPINAL CORD DEVELOPMENT                                              | 6.75E-05  | 0.0026036 |
| TRANSCRIPTION FACTOR ACTIVITY                                        | 1.98E-06  | 1.13E-04  |
| EPITHELIAL TUBE FORMATION                                            | 9.23E-04  | 0.021867  |
| NEGATIVE REGULATION OF TRANSCRIPTION, DNA-DEPENDENT                  | 1.41E-11  | 6.18E-09  |
| NEGATIVE REGULATION OF MAPKKK CASCADE                                | 7.24E-04  | 0.018126  |
| NEGATIVE REGULATION OF CELLULAR BIOSYNTHETIC PROCESS                 | 3.05E-11  | 7.99E-09  |
| POSITIVE REGULATION OF MACROMOLECULE BIOSYNTHETIC PROCESS            | 5.81E-08  | 4.31E-06  |
| POSITIVE REGULATION OF GENE EXPRESSION                               | 4.15E-09  | 3.89E-07  |
| NEGATIVE REGULATION OF NITROGEN COMPOUND METABOLIC PROCESS           | 3.97E-11  | 9.19E-09  |
| EMBRYONIC LIMB MORPHOGENESIS                                         | 6.75E-04  | 0.018106  |
| NEGATIVE REGULATION OF METABOLIC PROCESS                             | 9.69E-10  | 1.13E-07  |
| REGULATION OF NITROGEN COMPOUND METABOLIC PROCESS                    | 1.35E-11  | 6.18E-09  |
| CONDENSED CHROMOSOME                                                 | 4.14E-04  | 0.012514  |
| G2/M TRANSITION CHECKPOINT                                           | 1.45E-04  | 0.0049311 |
| DNA ALKYLATION                                                       | 2.30E-04  | 0.00734   |
| INTRACELLULAR SIGNALING PATHWAY                                      | 0.0025611 | 0.04517   |
| MOLECULAR_ FUNCTION                                                  | 2.03E-04  | 0.0066578 |
| INTRACELLULAR ORGANELLE PART                                         | 2.59E-06  | 1.39E-04  |
| ORGANELLE                                                            | 2.05E-11  | 7.33E-09  |
| REGULATION OF CELLULAR PROCESS                                       | 1.08E-10  | 2.12E-08  |
| INTRACELLULAR ORGANELLE LUMEN                                        | 4.67E-04  | 0.013814  |
| ORGANELLE LUMEN                                                      | 5.58E-04  | 0.015509  |
| REGULATION OF CELL CYCLE                                             | 2.69E-04  | 0.0083233 |
| MEMBRANE-ENCLOSED LUMEN                                              | 0.0010446 | 0.024166  |
| ORGANELLE PART                                                       | 4.73E-06  | 2.39E-04  |
| POSITIVE REGULATION OF CELLULAR BIOSYNTHETIC PROCESS                 | 1.81E-07  | 1.23E-05  |
| REGULATION OF BIOLOGICAL PROCESS                                     | 4.61E-10  | 6.48E-08  |
| NEGATIVE REGULATION OF CELLULAR PROCESS                              | 2.60E-09  | 2.76E-07  |
| NUCLEAR LUMEN                                                        | 1.58E-05  | 7.13E-04  |
| GENE EXPRESSION                                                      | 0.0027105 | 0.046638  |
| CELLULAR PROCESS                                                     | 7.04E-07  | 4.33E-05  |
| NEGATIVE REGULATION OF CELL PROLIFERATION                            | 2.18E-04  | 0.0070748 |
| INTRACELLULAR ORGANELLE                                              | 1.58E-11  | 6.20E-09  |
| SKELETAL SYSTEM DEVELOPMENT                                          | 0.002048  | 0.038912  |
| CELLULAR NITROGEN COMPOUND METABOLIC PROCESS                         | 0.001609  | 0.032959  |
| EPITHELIUM DEVELOPMENT                                               | 4.81E-04  | 0.014131  |
| INTRACELLULAR MEMBRANE-BOUNDED ORGANELLE                             | 7.88E-13  | 8.93E-10  |
| MACROMOLECULAR COMPLEX                                               | 3.48E-04  | 0.010684  |
| BIOLOGICAL REGULATION                                                | 1.28E-08  | 1.07E-06  |
| REGULATION OF INTRACELLULAR PROTEIN KINASE CASCADE                   | 6.28E-04  | 0.017259  |
| PROTEIN BINDING                                                      | 7.84E-14  | 1.54E-10  |
| NITROGEN COMPOUND METABOLIC PROCESS                                  | 9.03E-04  | 0.021526  |
| INTRACELLULAR PART                                                   | 1.80E-08  | 1.42E-06  |
| POSITIVE REGULATION OF CELLULAR METABOLIC PROCESS                    | 1.58E-07  | 1.11E-05  |
| INTRACELLULAR                                                        | 6.31E-09  | 5.77E-07  |
| POSITIVE REGULATION OF METABOLIC PROCESS                             | 4.71E-07  | 2.94E-05  |
| POSITIVE REGULATION OF CELLULAR PROCESS                              | 3.96E-06  | 2.05E-04  |
| POSITIVE REGULATION OF BIOLOGICAL PROCESS                            | 7.64E-06  | 3.66E-04  |
| ORGAN MORPHOGENESIS                                                  | 4.57E-04  | 0.013607  |
| MORPHOGENESIS OF A BRANCHING EPITHELIUM                              | 0.0019794 | 0.038186  |
| REGULATION OF CELL PROLIFERATION                                     | 5.60E-04  | 0.015509  |
| NEGATIVE REGULATION OF BIOLOGICAL PROCESS                            | 1.45E-08  | 1.19E-06  |
| BINDING                                                              | 1.11E-08  | 9.53E-07  |
| RNA METABOLIC PROCESS                                                | 5.53E-04  | 0.015509  |
| POSITIVE REGULATION OF MACROMOLECULE METABOLIC PROCESS               | 6.08E-08  | 4.43E-06  |
| MEMBRANE-BOUNDED ORGANELLE                                           | 9.08E-13  | 8.93E-10  |
