# Supplementary material for: THC exposure of human iPSC neurons impacts genes associated with neuropsychiatric disorders
Source: PubMed Central journal article supplement (PMC5915454; doi:10.1038/s41398-018-0137-3), 2018-04-25
Supplement: 41398_2018_137_MOESM8_ESM.pdf [file 41398_2018_137_MOESM8_ESM.pdf]

## Supplementary Table 7: Disease-related genes

### Autism

| Gene Number | Chromosome | Gene ID         | Gene Name |
|-------------|------------|-----------------|-----------|
| 1           | 16         | ENSG00000183044 | ABAT      |
| 2           | 9          | ENSG00000165029 | ABCA1     |
| 3           | 17         | ENSG00000154263 | ABCA10    |
| 4           | 19         | ENSG00000064687 | ABCA7     |
| 5           | 17         | ENSG00000159640 | ACE       |
| 6           | 7          | ENSG00000087085 | ACHE      |
| 7           | X          | ENSG00000068366 | ACSL4     |
| 8           | 3          | ENSG00000136518 | ACTL6A    |
| 9           | 19         | ENSG00000130402 | ACTN4     |
| 10          | 3          | ENSG00000243989 | ACY1      |
| 11          | 20         | ENSG00000196839 | ADA       |
| 12          | 20         | ENSG00000149451 | ADAM33    |
| 13          | 16         | ENSG00000140873 | ADAMTS18  |
| 14          | 21         | ENSG00000197381 | ADARB1    |
| 15          | 2          | ENSG00000138031 | ADCY3     |
| 16          | 3          | ENSG00000173175 | ADCY5     |
| 17          | 10         | ENSG00000156110 | ADK       |
| 18          | 20         | ENSG00000101126 | ADNP      |
| 19          | 22         | ENSG00000128271 | ADORA2A   |
| 20          | 1          | ENSG00000121933 | ADORA3    |
| 21          | 5          | ENSG00000169252 | ADRB2     |
| 22          | 22         | ENSG00000239900 | ADSL      |
|             | X          | ENSG00000155966 |           |
| 23          | X          | ENSG00000281817 | AFF2      |
| 24          | 5          | ENSG00000072364 | AFF4      |
| 25          | 2          | ENSG00000157985 | AGAP1     |
| 26          | 12         | ENSG00000135439 | AGAP2     |
| 27          | 1          | ENSG00000186094 | AGBL4     |
| 28          | 7          | ENSG00000006530 | AGK       |
| 29          | 7          | ENSG00000187546 | AGMO      |
| 30          | X          | ENSG00000180772 | AGTR2     |
| 31          | 1          | ENSG00000126705 | AHDC1     |
| 32          | 6          | ENSG00000135541 | AHI1      |
| 33          | 7          | ENSG00000127914 | AKAP9     |
| 34          | 15         | ENSG00000184254 | ALDH1A3   |
| 35          | 6          | ENSG00000112294 | ALDH5A1   |
| 36          | 5          | ENSG00000164904 | ALDH7A1   |
| 37          | 1          | ENSG00000088035 | ALG6      |
| 38          | 13         | ENSG00000132965 | ALOX5AP   |
| 39          | 1          | ENSG00000116748 | AMPD1     |
| 40          | 3          | ENSG00000145020 | AMT       |
| 41          | 4          | ENSG00000145362 | ANK2      |
| 42          | 10         | ENSG00000151150 | ANK3      |

|    |    |                 |           |
|----|----|-----------------|-----------|
| 43 | 16 | ENSG00000167522 | ANKRD11   |
| 44 | 12 | ENSG00000185046 | ANKS1B    |
| 45 | 9  | ENSG00000135046 | ANXA1     |
| 46 | X  | ENSG00000182287 | AP1S2     |
| 47 | 15 | ENSG00000034053 | APBA2     |
| 48 | 5  | ENSG00000134982 | APC       |
| 49 | 1  | ENSG00000117362 | APH1A     |
| 50 | 21 | ENSG00000142192 | APP       |
| 51 | X  | ENSG00000169083 | AR        |
| 52 | 15 | ENSG00000187951 | ARHGAP11B |
| 53 | 2  | ENSG00000075884 | ARHGAP15  |
| 54 | 4  | ENSG00000138639 | ARHGAP24  |
| 55 | 11 | ENSG00000134909 | ARHGAP32  |
| 56 | 19 | ENSG00000004777 | ARHGAP33  |
| 57 | X  | ENSG00000129675 | ARHGEF6   |
| 58 | X  | ENSG00000131089 | ARHGEF9   |
| 59 | 6  | ENSG00000049618 | ARID1B    |
| 60 | 15 | ENSG00000172379 | ARNT2     |
| 61 | 5  | ENSG00000164291 | ARSK      |
| 62 | X  | ENSG00000004848 | ARX       |
| 63 | 12 | ENSG00000177981 | ASB8      |
| 64 | 1  | ENSG00000116539 | ASH1L     |
| 65 | X  | ENSG00000196433 | ASMT      |
| 66 | 9  | ENSG00000130707 | ASS1      |
| 67 | 9  | ENSG00000148219 | ASTN2     |
| 68 | 18 | ENSG00000141431 | ASXL3     |
| 69 | 3  | ENSG00000197548 | ATG7      |
| 70 | 15 | ENSG00000206190 | ATP10A    |
| 71 | 3  | ENSG00000127249 | ATP13A4   |
| 72 | 19 | ENSG00000105409 | ATP1A3    |
| 73 | 1  | ENSG00000143153 | ATP1B1    |
| 74 | 3  | ENSG00000157087 | ATP2B2    |
| 75 | 4  | ENSG00000124406 | ATP8A1    |
| 76 | 20 | ENSG00000088812 | ATRNL1    |
| 77 | 10 | ENSG00000107518 | ATRNL1    |
| 78 | X  | ENSG00000085224 | ATRX      |
| 79 | 3  | ENSG00000163635 | ATXN7     |
| 80 | 7  | ENSG00000158321 | AUTS2     |
| 81 | 20 | ENSG00000101200 | AVP       |
| 82 | 12 | ENSG00000166148 | AVPR1A    |
| 83 | 17 | ENSG00000266074 | BAHCC1    |
| 84 | 17 | ENSG00000175866 | BAIAP2    |
| 85 | 4  | ENSG00000153064 | BANK1     |
| 86 | 12 | ENSG00000179941 | BBS10     |
| 87 | 15 | ENSG00000140463 | BBS4      |
| 88 | 20 | ENSG00000064787 | BCAS1     |
| 89 | 16 | ENSG00000103507 | BCKDK     |
| 90 | 2  | ENSG00000119866 | BCL11A    |

|     |    |                 |          |
|-----|----|-----------------|----------|
| 91  | 18 | ENSG00000171791 | BCL2     |
| 92  | 1  | ENSG00000116128 | BCL9     |
| 93  | 11 | ENSG00000176697 | BDNF     |
| 94  | 10 | ENSG00000165626 | BEND7    |
| 95  | 10 | ENSG00000122870 | BICC1    |
| 96  | 2  | ENSG00000136717 | BIN1     |
| 97  | 2  | ENSG00000115760 | BIRC6    |
| 98  | 7  | ENSG00000157764 | BRAF     |
| 99  | 13 | ENSG00000139618 | BRCA2    |
| 100 | 9  | ENSG00000078725 | BRINP1   |
| 101 | 10 | ENSG00000095564 | BTAF1    |
| 102 | 6  | ENSG00000124557 | BTN1A1   |
| 103 | 17 | ENSG00000005379 | BZRAP1   |
| 104 | 11 | ENSG00000158636 | C11orf30 |
| 105 | 12 | ENSG00000111678 | C12orf57 |
| 106 | 15 | ENSG00000167014 | C15orf43 |
| 107 | 12 | ENSG00000182326 | C1S      |
| 108 | 1  | ENSG00000143612 | C1orf43  |
| 109 | 1  | ENSG00000203685 | C1orf95  |
| 110 | 11 | ENSG00000168014 | C2CD3    |
| 111 | 3  | ENSG00000181744 | C3orf58  |
| 112 | 6  | ENSG00000224389 | C4B      |
| 113 | 1  | ENSG00000131686 | CA6      |
| 114 | 19 | ENSG00000141837 | CACNA1A  |
| 115 | 9  | ENSG00000148408 | CACNA1B  |
| 116 | 12 | ENSG00000151067 | CACNA1C  |
| 117 | 3  | ENSG00000157388 | CACNA1D  |
| 118 | 1  | ENSG00000198216 | CACNA1E  |
| 119 | X  | ENSG00000102001 | CACNA1F  |
| 120 | 17 | ENSG00000006283 | CACNA1G  |
| 121 | 16 | ENSG00000196557 | CACNA1H  |
| 122 | 22 | ENSG00000100346 | CACNA1I  |
| 123 | 3  | ENSG00000157445 | CACNA2D3 |
| 124 | 10 | ENSG00000165995 | CACNB2   |
| 125 | 11 | ENSG00000182985 | CADM1    |
| 126 | 3  | ENSG00000175161 | CADM2    |
| 127 | 7  | ENSG00000081803 | CADPS2   |
| 128 | 5  | ENSG00000152495 | CAMK4    |
| 129 | 1  | ENSG00000118200 | CAMSAP2  |
| 130 | 1  | ENSG00000171735 | CAMTA1   |
| 131 | 19 | ENSG00000182472 | CAPN12   |
| 132 | 11 | ENSG00000135387 | CAPRIN1  |
| 133 | 15 | ENSG00000166734 | CASC4    |
| 134 | 7  | ENSG00000127995 | CASD1    |
| 135 | X  | ENSG00000147044 | CASK     |
|     | 21 | ENSG00000160200 |          |
| 136 | 21 | ENSG00000274276 | CBS      |
| 137 | 17 | ENSG00000141582 | CBX4     |

|     |    |                 |          |
|-----|----|-----------------|----------|
| 138 | 19 | ENSG00000132024 | CC2D1A   |
| 139 | 12 | ENSG00000135127 | CCDC64   |
| 140 | 14 | ENSG00000015133 | CCDC88C  |
| 141 | 12 | ENSG00000123106 | CCDC91   |
| 142 | 2  | ENSG00000115484 | CCT4     |
| 143 | 17 | ENSG00000186074 | CD300LF  |
| 144 | 1  | ENSG00000174059 | CD34     |
| 145 | 4  | ENSG00000004468 | CD38     |
| 146 | 11 | ENSG00000026508 | CD44     |
| 147 | X  | ENSG00000102181 | CD99L2   |
| 148 | 14 | ENSG00000198752 | CDC42BPB |
| 149 | 17 | ENSG00000179604 | CDC42EP4 |
| 150 | 5  | ENSG00000040731 | CDH10    |
| 151 | 16 | ENSG00000140937 | CDH11    |
| 152 | 16 | ENSG00000140945 | CDH13    |
| 153 | 16 | ENSG00000129910 | CDH15    |
| 154 | 20 | ENSG00000149654 | CDH22    |
| 155 | 16 | ENSG00000150394 | CDH8     |
| 156 | 5  | ENSG00000113100 | CDH9     |
| 157 | X  | ENSG00000008086 | CDKL5    |
| 158 | 12 | ENSG00000111276 | CDKN1B   |
| 159 | 22 | ENSG00000099954 | CECR2    |
| 160 | 18 | ENSG00000101489 | CELF4    |
|     | 15 | ENSG00000140488 |          |
| 161 | 15 | ENSG00000273025 | CELF6    |
| 162 | 12 | ENSG00000198707 | CEP290   |
| 163 | 7  | ENSG00000106477 | CEP41    |
| 164 | 15 | ENSG00000128849 | CGNL1    |
| 165 | 15 | ENSG00000128965 | CHAC1    |
| 166 | 15 | ENSG00000173575 | CHD2     |
| 167 | 8  | ENSG00000171316 | CHD7     |
| 168 | 14 | ENSG00000100888 | CHD8     |
| 169 | 22 | ENSG00000100288 | CHKB     |
| 170 | 3  | ENSG00000083937 | CHMP2B   |
| 171 | 1  | ENSG00000133019 | CHRM3    |
| 172 | 20 | ENSG00000101204 | CHRNA4   |
| 173 | 15 | ENSG00000175344 | CHRNA7   |
| 174 | 1  | ENSG00000160716 | CHRN2    |
| 175 | 8  | ENSG00000147432 | CHRN3    |
| 176 | 16 | ENSG00000135702 | CHST5    |
| 177 | 15 | ENSG00000136425 | CIB2     |
| 178 | 19 | ENSG00000079432 | CIC      |
| 179 | 2  | ENSG00000074054 | CLASP1   |
| 180 | 1  | ENSG00000011021 | CLCN6    |
| 181 | 3  | ENSG00000013297 | CLDN11   |
| 182 | 8  | ENSG00000182372 | CLN8     |
| 183 | 12 | ENSG00000139182 | CLSTN3   |
| 184 | 22 | ENSG00000070371 | CLTCL1   |

|     |    |                 |         |
|-----|----|-----------------|---------|
| 185 | 16 | ENSG00000153815 | CMIP    |
| 186 | 16 | ENSG00000125107 | CNOT1   |
| 187 | 19 | ENSG00000088038 | CNOT3   |
| 188 | 6  | ENSG00000118432 | CNR1    |
| 189 | 1  | ENSG00000188822 | CNR2    |
| 190 | 3  | ENSG00000113805 | CNTN3   |
| 191 | 3  | ENSG00000144619 | CNTN4   |
| 192 | 11 | ENSG00000149972 | CNTN5   |
| 193 | 3  | ENSG00000134115 | CNTN6   |
| 194 | 7  | ENSG00000174469 | CNTNAP2 |
| 195 | 9  | ENSG00000106714 | CNTNAP3 |
| 196 | 16 | ENSG00000152910 | CNTNAP4 |
| 197 | 2  | ENSG00000155052 | CNTNAP5 |
| 198 | 4  | ENSG00000188517 | COL25A1 |
| 199 | 22 | ENSG00000093010 | COMT    |
| 200 | 16 | ENSG00000005339 | CREBBP  |
| 201 | 7  | ENSG00000106113 | CRHR2   |
| 202 | 12 | ENSG00000008405 | CRY1    |
| 203 | 1  | ENSG00000009307 | CSDE1   |
| 204 | 8  | ENSG00000183117 | CSMD1   |
| 205 | 17 | ENSG00000141551 | CSNK1D  |
| 206 | 10 | ENSG00000177613 | CSTF2T  |
| 207 | 16 | ENSG00000102974 | CTCF    |
| 208 | 10 | ENSG00000183230 | CTNNA3  |
| 209 | 3  | ENSG00000168036 | CTNNB1  |
| 210 | 5  | ENSG00000169862 | CTNND2  |
| 211 | 7  | ENSG00000077063 | CTTNBP2 |
| 212 | 2  | ENSG00000036257 | CUL3    |
| 213 | 6  | ENSG00000044090 | CUL7    |
| 214 | 7  | ENSG00000257923 | CUX1    |
| 215 | 3  | ENSG00000168329 | CX3CR1  |
| 216 | X  | ENSG00000186810 | CXCR3   |
| 217 | 15 | ENSG00000273749 | CYFIP1  |
| 218 | 9  | ENSG00000155833 | CYLC2   |
| 219 | 8  | ENSG00000160882 | CYP11B1 |
| 220 | 1  | ENSG00000173406 | DAB1    |
| 221 | 11 | ENSG00000134780 | DAGLA   |
| 222 | 9  | ENSG00000196730 | DAPK1   |
| 223 | 4  | ENSG00000070190 | DAPP1   |
| 224 | 9  | ENSG00000123454 | DBH     |
| 225 | 14 | ENSG00000100897 | DCAF11  |
| 226 | 16 | ENSG00000166847 | DCTN5   |
| 227 | 3  | ENSG00000043093 | DCUN1D1 |
| 228 | X  | ENSG00000077279 | DCX     |
| 229 | 7  | ENSG00000132437 | DDC     |
| 230 | 12 | ENSG00000013573 | DDX11   |
| 231 | X  | ENSG00000215301 | DDX3X   |
| 232 | X  | ENSG00000184735 | DDX53   |

|     |    |                 |         |
|-----|----|-----------------|---------|
| 233 | 11 | ENSG00000177030 | DEAF1   |
| 234 | 12 | ENSG00000139726 | DENR    |
| 235 | 22 | ENSG00000100150 | DEPDC5  |
| 236 | X  | ENSG00000274588 | DGKK    |
| 237 | 11 | ENSG00000149091 | DGKZ    |
| 238 | 11 | ENSG00000172893 | DHCR7   |
| 239 | 5  | ENSG00000067248 | DHX29   |
| 240 | 13 | ENSG00000139734 | DIAPH3  |
| 241 | 21 | ENSG00000160305 | DIP2A   |
| 242 | 10 | ENSG00000151240 | DIP2C   |
| 243 | 1  | ENSG00000162946 | DISC1   |
| 244 | 11 | ENSG00000150764 | DIXDC1  |
| 245 | 3  | ENSG00000075711 | DLG1    |
| 246 | 17 | ENSG00000132535 | DLG4    |
| 247 | 18 | ENSG00000170579 | DLGAP1  |
| 248 | 8  | ENSG00000198010 | DLGAP2  |
| 249 | 1  | ENSG00000116544 | DLGAP3  |
| 250 | 2  | ENSG00000144355 | DLX1    |
| 251 | 2  | ENSG00000115844 | DLX2    |
| 252 | 7  | ENSG00000006377 | DLX6    |
| 253 | X  | ENSG00000198947 | DMD     |
| 254 | 19 | ENSG00000104936 | DMPK    |
| 255 | 15 | ENSG00000104093 | DMXL2   |
| 256 | 12 | ENSG00000197653 | DNAH10  |
| 257 | 5  | ENSG00000039139 | DNAH5   |
| 258 | 10 | ENSG00000136770 | DNAJC1  |
| 259 | 3  | ENSG00000205981 | DNAJC19 |
| 260 | 2  | ENSG00000187957 | DNER    |
| 261 | 12 | ENSG00000087470 | DNM1L   |
| 262 | 2  | ENSG00000119772 | DNMT3A  |
| 263 | 10 | ENSG00000150760 | DOCK1   |
| 264 | 2  | ENSG00000135905 | DOCK10  |
| 265 | 7  | ENSG00000128512 | DOCK4   |
| 266 | 9  | ENSG00000107099 | DOCK8   |
| 267 | 9  | ENSG00000175283 | DOLK    |
| 268 | 2  | ENSG00000175497 | DPP10   |
| 269 | 2  | ENSG00000197635 | DPP4    |
| 270 | 7  | ENSG00000130226 | DPP6    |
| 271 | 1  | ENSG00000188641 | DPYD    |
| 272 | 5  | ENSG00000184845 | DRD1    |
| 273 | 11 | ENSG00000149295 | DRD2    |
| 274 | 3  | ENSG00000151577 | DRD3    |
| 275 | 11 | ENSG00000069696 | DRD4    |
| 276 | 21 | ENSG00000171587 | DSCAM   |
| 277 | 6  | ENSG00000151914 | DST     |
| 278 | 17 | ENSG00000276023 | DUSP14  |
| 279 | 20 | ENSG00000149599 | DUSP15  |
| 280 | 6  | ENSG00000112679 | DUSP22  |

|     |    |                 |          |
|-----|----|-----------------|----------|
| 281 | 1  | ENSG00000107404 | DVL1     |
| 282 | 3  | ENSG00000161202 | DVL3     |
| 283 | 10 | ENSG00000170788 | DYDC1    |
| 284 | 10 | ENSG00000133665 | DYDC2    |
| 285 | 14 | ENSG00000197102 | DYNC1H1  |
| 286 | 2  | ENSG00000077380 | DYNC1I2  |
| 287 | 21 | ENSG00000157540 | DYRK1A   |
| 288 | 20 | ENSG00000101210 | EEF1A2   |
| 289 | 8  | ENSG00000132294 | EFR3A    |
| 290 | 10 | ENSG00000122877 | EGR2     |
| 291 | 9  | ENSG00000181090 | EHMT1    |
| 292 | 19 | ENSG00000130811 | EIF3G    |
| 293 | 4  | ENSG00000151247 | EIF4E    |
| 294 | 10 | ENSG00000148730 | EIF4EBP2 |
| 295 | 9  | ENSG00000107105 | ELAVL2   |
| 296 | 19 | ENSG00000196361 | ELAVL3   |
| 297 | 1  | ENSG00000066322 | ELOVL1   |
| 298 | 11 | ENSG00000109911 | ELP4     |
| 299 | 14 | ENSG00000066629 | EML1     |
| 300 | 7  | ENSG00000164778 | EN2      |
| 301 | 22 | ENSG00000100393 | EP300    |
| 302 | 12 | ENSG00000183495 | EP400    |
| 303 | 2  | ENSG00000135999 | EPC2     |
| 304 | 3  | ENSG00000080224 | EPHA6    |
| 305 | 1  | ENSG00000133216 | EPHB2    |
| 306 | 7  | ENSG00000106123 | EPHB6    |
| 307 | 12 | ENSG00000151491 | EPS8     |
| 308 | 5  | ENSG00000112851 | ERBB2IP  |
| 309 | 2  | ENSG00000178568 | ERBB4    |
| 310 | 21 | ENSG00000157554 | ERG      |
| 311 | 2  | ENSG00000136541 | ERMN     |
| 312 | 6  | ENSG00000091831 | ESR1     |
| 313 | 14 | ENSG00000140009 | ESR2     |
| 314 | 14 | ENSG00000119715 | ESRRB    |
| 315 | 19 | ENSG00000105379 | ETFB     |
| 316 | 5  | ENSG00000180104 | EXOC3    |
| 317 | 14 | ENSG00000070367 | EXOC5    |
| 318 | 10 | ENSG00000138190 | EXOC6    |
| 319 | 2  | ENSG00000144036 | EXOC6B   |
| 320 | 8  | ENSG00000182197 | EXT1     |
| 321 | 6  | ENSG00000124491 | F13A1    |
| 322 | 1  | ENSG00000117525 | F3       |
| 323 | 1  | ENSG00000121769 | FABP3    |
| 324 | 8  | ENSG00000164687 | FABP5    |
| 325 | 6  | ENSG00000164434 | FABP7    |
| 326 | 8  | ENSG00000147724 | FAM135B  |
| 327 | X  | ENSG00000185448 | FAM47A   |
| 328 | 6  | ENSG00000137414 | FAM8A1   |

|     |    |                 |         |
|-----|----|-----------------|---------|
| 329 | 16 | ENSG00000153789 | FAM92B  |
| 330 | 15 | ENSG00000198690 | FAN1    |
| 331 | 4  | ENSG00000083857 | FAT1    |
| 332 | 15 | ENSG00000166147 | FBN1    |
| 333 | 4  | ENSG00000118564 | FBXL5   |
| 334 | 18 | ENSG00000141665 | FBXO15  |
| 335 | 14 | ENSG00000165355 | FBXO33  |
| 336 | 3  | ENSG00000163833 | FBXO40  |
| 337 | 19 | ENSG00000186431 | FCAR    |
| 338 | 1  | ENSG00000181036 | FCRL6   |
| 339 | 5  | ENSG00000151422 | FER     |
| 340 | 7  | ENSG00000128610 | FEZF1   |
| 341 | 3  | ENSG00000153266 | FEZF2   |
| 342 | 4  | ENSG00000171560 | FGA     |
| 343 | X  | ENSG00000102302 | FGD1    |
| 344 | 10 | ENSG00000174721 | FGFBP3  |
| 345 | 3  | ENSG00000189283 | FHIT    |
| 346 | 13 | ENSG00000102755 | FLT1    |
| 347 | X  | ENSG00000102081 | FMR1    |
| 348 | 11 | ENSG00000086205 | FOLH1   |
| 349 | 14 | ENSG00000176165 | FOXG1   |
| 350 | 3  | ENSG00000114861 | FOXP1   |
| 351 | 7  | ENSG00000128573 | FOXP2   |
| 352 | 4  | ENSG00000183090 | FREM3   |
| 353 | 6  | ENSG00000111816 | FRK     |
| 354 | X  | ENSG00000169933 | FRMPD4  |
| 355 | X  | ENSG00000068438 | FTSJ1   |
| 356 | 7  | ENSG00000188763 | FZD9    |
| 357 | 5  | ENSG00000022355 | GABRA1  |
| 358 | X  | ENSG00000011677 | GABRA3  |
| 359 | 4  | ENSG00000109158 | GABRA4  |
| 360 | 15 | ENSG00000186297 | GABRA5  |
| 361 | 4  | ENSG00000163288 | GABRB1  |
| 362 | 15 | ENSG00000166206 | GABRB3  |
| 363 | 15 | ENSG00000182256 | GABRG3  |
| 364 | X  | ENSG00000268089 | GABRQ   |
| 365 | 2  | ENSG00000128683 | GAD1    |
| 366 | 19 | ENSG00000099860 | GADD45B |
| 367 | 2  | ENSG00000144278 | GALNT13 |
| 368 | 2  | ENSG00000158089 | GALNT14 |
| 369 | 19 | ENSG00000130005 | GAMT    |
| 370 | 16 | ENSG00000261609 | GAN     |
| 371 | 3  | ENSG00000172020 | GAP43   |
| 372 | 11 | ENSG00000148935 | GAS2    |
| 373 | 15 | ENSG00000171766 | GATM    |
| 374 | 9  | ENSG00000119125 | GDA     |
| 375 | 11 | ENSG00000178795 | GDPD4   |
| 376 | 7  | ENSG00000146830 | GIGYF1  |



|     |    |                 |         |
|-----|----|-----------------|---------|
| 377 | 2  | ENSG00000204120 | GIGYF2  |
| 378 | 1  | ENSG00000174332 | GLIS1   |
| 379 | 6  | ENSG00000124767 | GLO1    |
| 380 | X  | ENSG00000101958 | GLRA2   |
| 381 | X  | ENSG00000182890 | GLUD2   |
| 382 | 6  | ENSG00000112312 | GMNN    |
| 383 | 9  | ENSG00000156049 | GNA14   |
| 384 | 20 | ENSG00000087460 | GNAS    |
| 385 | 22 | ENSG00000185838 | GNB1L   |
| 386 | 3  | ENSG00000173230 | GOLGB1  |
| 387 | X  | ENSG00000076716 | GPC4    |
| 388 | 13 | ENSG00000183098 | GPC6    |
| 389 | 2  | ENSG00000115159 | GPD2    |
| 390 | 14 | ENSG00000171723 | GPHN    |
| 391 | 8  | ENSG00000020181 | GPR124  |
| 392 | 16 | ENSG00000180269 | GPR139  |
| 393 | 7  | ENSG00000170775 | GPR37   |
| 394 | 7  | ENSG00000164604 | GPR85   |
| 395 | X  | ENSG00000158301 | GPRASP2 |
| 396 | 3  | ENSG00000233276 | GPX1    |
| 397 | X  | ENSG00000125675 | GRIA3   |
| 398 | 10 | ENSG00000182771 | GRID1   |
| 399 | 4  | ENSG00000152208 | GRID2   |
| 400 | 7  | ENSG00000215045 | GRID2IP |
| 401 | 6  | ENSG00000164418 | GRIK2   |
| 402 | 1  | ENSG00000163873 | GRIK3   |
| 403 | 11 | ENSG00000149403 | GRIK4   |
| 404 | 19 | ENSG00000105737 | GRIK5   |
| 405 | 9  | ENSG00000176884 | GRIN1   |
| 406 | 16 | ENSG00000183454 | GRIN2A  |
| 407 | 12 | ENSG00000273079 | GRIN2B  |
| 408 | 19 | ENSG00000116032 | GRIN3B  |
| 409 | 12 | ENSG00000155974 | GRIP1   |
| 410 | 6  | ENSG00000152822 | GRM1    |
| 411 | 6  | ENSG00000124493 | GRM4    |
| 412 | 11 | ENSG00000168959 | GRM5    |
| 413 | 3  | ENSG00000196277 | GRM7    |
| 414 | 7  | ENSG00000179603 | GRM8    |
| 415 | X  | ENSG00000126010 | GRPR    |
| 416 | 3  | ENSG00000082701 | GSK3B   |
| 417 | 9  | ENSG00000148180 | GSN     |
| 418 | 1  | ENSG00000134184 | GSTM1   |
| 419 | 7  | ENSG00000263001 | GTF2I   |
| 420 | 11 | ENSG00000152402 | GUCY1A2 |
| 421 | X  | ENSG00000172534 | HCFC1   |
| 422 | 12 | ENSG00000111727 | HCFC2   |
| 423 | 5  | ENSG00000164588 | HCN1    |
| 424 | 5  | ENSG00000171720 | HDAC3   |

|     |    |                 |          |
|-----|----|-----------------|----------|
| 425 | 2  | ENSG00000068024 | HDAC4    |
| 426 | X  | ENSG00000094631 | HDAC6    |
| 427 | 2  | ENSG00000138411 | HECW2    |
| 428 | 11 | ENSG00000165478 | HEPACAM  |
| 429 | 15 | ENSG00000128731 | HERC2    |
| 430 | 6  | ENSG00000197409 | HIST1H3D |
| 431 | 6  | ENSG00000278705 | HIST1H4B |
| 432 | 6  | ENSG00000206503 | HLA-A    |
| 433 | 6  | ENSG00000234745 | HLA-B    |
| 434 | 6  | ENSG00000196126 | HLA-DRB1 |
| 435 | 21 | ENSG00000205581 | HMGN1    |
| 436 | X  | ENSG00000126945 | HNRNPH2  |
| 437 | 5  | ENSG00000152413 | HOMER1   |
| 438 | 7  | ENSG00000105991 | HOXA1    |
| 439 | 17 | ENSG00000120094 | HOXB1    |
| 440 | 11 | ENSG00000174775 | HRAS     |
| 441 | 6  | ENSG00000249853 | HS3ST5   |
| 442 | 1  | ENSG00000117594 | HSD11B1  |
| 443 | 6  | ENSG00000135312 | HTR1B    |
| 444 | 13 | ENSG00000102468 | HTR2A    |
| 445 | 11 | ENSG00000166736 | HTR3A    |
| 446 | 3  | ENSG00000178084 | HTR3C    |
| 447 | 10 | ENSG00000148680 | HTR7     |
| 448 | X  | ENSG00000086758 | HUWE1    |
| 449 | 16 | ENSG00000157423 | HYDIN    |
| 450 | 7  | ENSG00000003147 | ICA1     |
| 451 | 12 | ENSG00000111537 | IFNG     |
| 452 | 6  | ENSG00000027697 | IFNGR1   |
| 453 | 11 | ENSG00000167244 | IGF2     |
| 454 | 15 | ENSG00000172349 | IL16     |
| 455 | 6  | ENSG00000112115 | IL17A    |
| 456 | 2  | ENSG00000115590 | IL1R2    |
| 457 | X  | ENSG00000169306 | IL1RAPL1 |
| 458 | X  | ENSG00000189108 | IL1RAPL2 |
| 459 | 7  | ENSG00000136244 | IL6      |
| 460 | 1  | ENSG00000143621 | ILF2     |
| 461 | 7  | ENSG00000184903 | IMMP2L   |
| 462 | 1  | ENSG00000132849 | INADL    |
| 463 | 2  | ENSG00000151689 | INPP1    |
| 464 | 13 | ENSG00000102786 | INTS6    |
| 465 | X  | ENSG00000124313 | IQSEC2   |
| 466 | 14 | ENSG00000119669 | IRF2BPL  |
| 467 | 2  | ENSG00000115232 | ITGA4    |
| 468 | 12 | ENSG00000161638 | ITGA5    |
| 469 | 17 | ENSG00000259207 | ITGB3    |
| 470 | 1  | ENSG00000142856 | ITGB3BP  |
| 471 | 12 | ENSG00000139626 | ITGB7    |
| 472 | 4  | ENSG00000152969 | JAKMIP1  |

|     |    |                 |          |
|-----|----|-----------------|----------|
| 473 | 6  | ENSG00000008083 | JARID2   |
| 474 | 10 | ENSG00000171988 | JMJD1C   |
| 475 | 9  | ENSG00000107104 | KANK1    |
| 476 | 3  | ENSG00000114166 | KAT2B    |
| 477 | 8  | ENSG00000083168 | KAT6A    |
| 478 | 18 | ENSG00000167216 | KATNAL2  |
| 479 | 7  | ENSG00000184408 | KCND2    |
| 480 | 1  | ENSG00000177807 | KCNJ10   |
| 481 | 17 | ENSG00000184185 | KCNJ12   |
| 482 | 21 | ENSG00000157551 | KCNJ15   |
| 483 | 17 | ENSG00000123700 | KCNJ2    |
| 484 | 10 | ENSG00000156113 | KCNMA1   |
| 485 | 20 | ENSG00000075043 | KCNQ2    |
| 486 | 8  | ENSG00000184156 | KCNQ3    |
| 487 | 9  | ENSG00000107147 | KCNT1    |
| 488 | 8  | ENSG00000164794 | KCNV1    |
| 489 | 16 | ENSG00000174943 | KCTD13   |
| 490 | 19 | ENSG00000127663 | KDM4B    |
| 491 | 1  | ENSG00000117139 | KDM5B    |
| 492 | X  | ENSG00000126012 | KDM5C    |
| 493 | X  | ENSG00000147050 | KDM6A    |
| 494 | 17 | ENSG00000132510 | KDM6B    |
| 495 | 6  | ENSG00000112232 | KHDRBS2  |
| 496 | 8  | ENSG00000131773 | KHDRBS3  |
| 497 | 17 | ENSG00000007202 | KIAA0100 |
| 498 | 18 | ENSG00000134444 | KIAA1468 |
| 499 | 6  | ENSG00000168116 | KIAA1586 |
| 500 | X  | ENSG00000050030 | KIAA2022 |
| 501 | 8  | ENSG00000197892 | KIF13B   |
| 502 | 2  | ENSG00000168280 | KIF5C    |
| 503 | 11 | ENSG00000149571 | KIRREL3  |
| 504 | 4  | ENSG00000157404 | KIT      |
| 505 | 11 | ENSG00000174996 | KLC2     |
| 506 | 1  | ENSG00000117009 | KMO      |
| 507 | 11 | ENSG00000118058 | KMT2A    |
| 508 | 7  | ENSG00000055609 | KMT2C    |
| 509 | 7  | ENSG00000005483 | KMT2E    |
| 510 | 19 | ENSG00000118162 | KPTN     |
| 511 | 12 | ENSG00000133703 | KRAS     |
| 512 | 12 | ENSG00000111615 | KRR1     |
| 513 | X  | ENSG00000198910 | L1CAM    |
| 514 | 18 | ENSG00000101680 | LAMA1    |
| 515 | 7  | ENSG00000091136 | LAMB1    |
| 516 | 9  | ENSG00000050555 | LAMC3    |
| 517 | 7  | ENSG00000174697 | LEP      |
| 518 | 19 | ENSG00000104863 | LIN7B    |
| 519 | 3  | ENSG00000071282 | LMCD1    |
| 520 | 19 | ENSG00000142235 | LMTK3    |

|     |    |                 |          |
|-----|----|-----------------|----------|
| 521 | 9  | ENSG00000136944 | LMX1B    |
| 522 | 8  | ENSG00000175445 | LPL      |
| 523 | 4  | ENSG00000198589 | LRBA     |
| 524 | 14 | ENSG00000165379 | LRFN5    |
| 525 | 12 | ENSG00000123384 | LRP1     |
| 526 | 2  | ENSG00000081479 | LRP2     |
| 527 | 4  | ENSG00000109771 | LRP2BP   |
| 528 | 2  | ENSG00000138095 | LRPPRC   |
| 529 | 6  | ENSG00000137269 | LRRC1    |
| 530 | 1  | ENSG00000033122 | LRRC7    |
| 531 | 5  | ENSG00000176018 | LYSMD3   |
| 532 | 22 | ENSG00000099949 | LZTR1    |
| 533 | 10 | ENSG00000107816 | LZTS2    |
| 534 | 20 | ENSG00000172264 | MACROD2  |
| 535 | X  | ENSG00000179222 | MAGED1   |
| 536 | 15 | ENSG00000254585 | MAGEL2   |
| 537 | 2  | ENSG00000172005 | MAL      |
| 538 | X  | ENSG00000189221 | MAOA     |
| 539 | X  | ENSG00000069535 | MAOB     |
| 540 | 2  | ENSG00000078018 | MAP2     |
| 541 | 15 | ENSG00000169032 | MAP2K1   |
| 542 | 22 | ENSG00000100030 | MAPK1    |
| 543 | 22 | ENSG00000188130 | MAPK12   |
| 544 | 16 | ENSG00000102882 | MAPK3    |
| 545 | 18 | ENSG00000141639 | MAPK4    |
| 546 | 22 | ENSG00000008735 | MAPK8IP2 |
| 547 | 17 | ENSG00000186868 | MAPT     |
| 548 | 2  | ENSG00000019169 | MARCO    |
| 549 | 1  | ENSG00000116141 | MARK1    |
| 550 | 19 | ENSG00000007047 | MARK4    |
| 551 | 18 | ENSG00000141644 | MBD1     |
| 552 | 19 | ENSG00000071655 | MBD3     |
| 553 | 3  | ENSG00000129071 | MBD4     |
| 554 | 2  | ENSG00000204406 | MBD5     |
| 555 | 12 | ENSG00000166987 | MBD6     |
| 556 | 19 | ENSG00000125505 | MBOAT7   |
| 557 | 18 | ENSG00000166603 | MC4R     |
| 558 | 5  | ENSG00000171444 | MCC      |
| 559 | 8  | ENSG00000104738 | MCM4     |
| 560 | 22 | ENSG00000100297 | MCM5     |
| 561 | 8  | ENSG00000147316 | MCPH1    |
| 562 | 14 | ENSG00000139915 | MDGA2    |
| 563 | X  | ENSG00000169057 | MECP2    |
| 564 | X  | ENSG00000184634 | MED12    |
| 565 | 17 | ENSG00000108510 | MED13    |
| 566 | 12 | ENSG00000123066 | MED13L   |
| 567 | 5  | ENSG00000081189 | MEF2C    |
| 568 | 15 | ENSG00000157890 | MEGF11   |

|     |    |                 |          |
|-----|----|-----------------|----------|
| 569 | 7  | ENSG00000105976 | MET      |
| 570 | 4  | ENSG00000145388 | METTL14  |
|     | 11 | ENSG00000235718 |          |
| 571 | 11 | ENSG00000259159 | MFRP     |
| 572 | 18 | ENSG00000101752 | MIB1     |
| 573 | X  | ENSG00000101871 | MID1     |
| 574 | 20 | ENSG00000125863 | MKKS     |
| 575 | 16 | ENSG00000186260 | MKL2     |
| 576 | 17 | ENSG00000070444 | MNT      |
| 577 | 18 | ENSG00000075643 | MOCOS    |
| 578 | 13 | ENSG00000196199 | MPHOSPH8 |
| 579 | 7  | ENSG00000105926 | MPP6     |
| 580 | 2  | ENSG00000135900 | MRPL44   |
| 581 | 20 | ENSG00000125901 | MRPS26   |
| 582 | X  | ENSG00000147065 | MSN      |
| 583 | 8  | ENSG00000038945 | MSR1     |
| 584 | 1  | ENSG00000188786 | MTF1     |
| 585 | 1  | ENSG00000177000 | MTHFR    |
| 586 | 1  | ENSG00000198793 | MTOR     |
| 587 | 1  | ENSG00000116984 | MTR      |
| 588 | 2  | ENSG00000128654 | MTX2     |
| 589 | 17 | ENSG00000264424 | MYH4     |
| 590 | 13 | ENSG00000041515 | MYO16    |
| 591 | 12 | ENSG00000166866 | MYO1A    |
| 592 | 15 | ENSG00000197535 | MYO5A    |
| 593 | 19 | ENSG00000099331 | MYO9B    |
| 594 | 10 | ENSG00000177791 | MYOZ1    |
| 595 | 2  | ENSG00000186487 | MYT1L    |
| 596 | 4  | ENSG00000164134 | NAA15    |
| 597 | 3  | ENSG00000177694 | NAALADL2 |
| 598 | 11 | ENSG00000166833 | NAV2     |
| 599 | 13 | ENSG00000172915 | NBEA     |
| 600 | 2  | ENSG00000061676 | NCKAP1   |
| 601 | 2  | ENSG00000176771 | NCKAP5   |
| 602 | 12 | ENSG00000167566 | NCKAP5L  |
| 603 | 17 | ENSG00000141027 | NCOR1    |
| 604 | 15 | ENSG00000185115 | NDNL2    |
| 605 | X  | ENSG00000124479 | NDP      |
| 606 | 7  | ENSG00000128609 | NDUFA5   |
| 607 | 3  | ENSG00000136521 | NDUFB5   |
| 608 | 8  | ENSG00000277586 | NEFL     |
| 609 | 11 | ENSG00000165973 | NELL1    |
| 610 | 15 | ENSG00000067141 | NEO1     |
| 611 | 17 | ENSG00000196712 | NF1      |
| 612 | 1  | ENSG00000162599 | NFIA     |
| 613 | 19 | ENSG00000008441 | NFIX     |
| 614 | X  | ENSG00000188158 | NHS      |
| 615 | 2  | ENSG00000196290 | NIF3L1   |

|     |    |                 |          |
|-----|----|-----------------|----------|
| 616 | 20 | ENSG00000101004 | NINL     |
| 617 | 15 | ENSG00000170113 | NIPA1    |
| 618 | 15 | ENSG00000140157 | NIPA2    |
| 619 | 5  | ENSG00000164190 | NIPBL    |
| 620 | 3  | ENSG00000169760 | NLGN1    |
| 621 | 17 | ENSG00000169992 | NLGN2    |
| 622 | X  | ENSG00000196338 | NLGN3    |
| 623 | X  | ENSG00000146938 | NLGN4X   |
| 624 | Y  | ENSG00000165246 | NLGN4Y   |
| 625 | 12 | ENSG00000089250 | NOS1     |
| 626 | 1  | ENSG00000198929 | NOS1AP   |
| 627 | 2  | ENSG00000170485 | NPAS2    |
| 628 | 5  | ENSG00000175745 | NR2F1    |
| 629 | 4  | ENSG00000151623 | NR3C2    |
| 630 | 7  | ENSG00000091129 | NRCAM    |
| 631 | 8  | ENSG00000157168 | NRG1     |
| 632 | 2  | ENSG00000118257 | NRP2     |
| 633 | 2  | ENSG00000179915 | NRXN1    |
| 634 | 11 | ENSG00000110076 | NRXN2    |
| 635 | 14 | ENSG00000021645 | NRXN3    |
| 636 | 5  | ENSG00000165671 | NSD1     |
| 637 | 12 | ENSG00000185652 | NTF3     |
| 638 | 19 | ENSG00000225950 | NTF4     |
| 639 | 1  | ENSG00000162631 | NTNG1    |
| 640 | 1  | ENSG00000198400 | NTRK1    |
| 641 | 15 | ENSG00000140538 | NTRK3    |
| 642 | 12 | ENSG00000074590 | NUAK1    |
| 643 | 1  | ENSG00000069248 | NUP133   |
| 644 | X  | ENSG00000126952 | NXF5     |
| 645 | 7  | ENSG00000122584 | NXPH1    |
| 646 | X  | ENSG00000122126 | OCRL     |
| 647 | 19 | ENSG00000181781 | ODF3L2   |
| 648 | X  | ENSG00000147162 | OGT      |
| 649 | X  | ENSG00000079482 | OPHN1    |
| 650 | 6  | ENSG00000112038 | OPRM1    |
| 651 | 1  | ENSG00000221888 | OR1C1    |
| 652 | 1  | ENSG00000187080 | OR2AK2   |
| 653 | 1  | ENSG00000171180 | OR2M4    |
| 654 | 1  | ENSG00000184022 | OR2T10   |
| 655 | 11 | ENSG00000197790 | OR52M1   |
| 656 | 2  | ENSG00000115507 | OTX1     |
| 657 | 20 | ENSG00000101405 | OXT      |
| 658 | 3  | ENSG00000180914 | OXTR     |
| 659 | 12 | ENSG00000135124 | P2RX4    |
| 660 | 17 | ENSG00000083454 | P2RX5    |
| 661 | 5  | ENSG00000072682 | P4HA2    |
| 662 | 11 | ENSG00000175115 | PACS1    |
| 663 | 17 | ENSG00000007168 | PAFAH1B1 |

|     |    |                 |          |
|-----|----|-----------------|----------|
| 664 | 12 | ENSG00000171759 | PAH      |
| 665 | 11 | ENSG00000149090 | PAMR1    |
| 666 | 1  | ENSG00000116183 | PAPPA2   |
| 667 | 2  | ENSG00000116117 | PARD3B   |
| 668 | 6  | ENSG00000185345 | PARK2    |
| 669 | 9  | ENSG00000196092 | PAX5     |
| 670 | 11 | ENSG00000007372 | PAX6     |
| 671 | 13 | ENSG00000175198 | PCCA     |
| 672 | 3  | ENSG00000114054 | PCCB     |
| 673 | 4  | ENSG00000138650 | PCDH10   |
| 674 | X  | ENSG00000102290 | PCDH11X  |
| 675 | 10 | ENSG00000150275 | PCDH15   |
| 676 | X  | ENSG00000165194 | PCDH19   |
| 677 | 13 | ENSG00000136099 | PCDH8    |
| 678 | 13 | ENSG00000184226 | PCDH9    |
| 679 | 5  | ENSG00000204970 | PCDHA1   |
| 680 | 5  | ENSG00000250120 | PCDHA10  |
| 681 | 5  | ENSG00000249158 | PCDHA11  |
| 682 | 5  | ENSG00000251664 | PCDHA12  |
| 683 | 5  | ENSG00000239389 | PCDHA13  |
| 684 | 5  | ENSG00000204969 | PCDHA2   |
| 685 | 5  | ENSG00000255408 | PCDHA3   |
| 686 | 5  | ENSG00000204967 | PCDHA4   |
| 687 | 5  | ENSG00000204965 | PCDHA5   |
| 688 | 5  | ENSG00000081842 | PCDHA6   |
| 689 | 5  | ENSG00000204963 | PCDHA7   |
| 690 | 5  | ENSG00000204962 | PCDHA8   |
| 691 | 5  | ENSG00000204961 | PCDHA9   |
| 692 | 5  | ENSG00000248383 | PCDHAC1  |
| 693 | 5  | ENSG00000243232 | PCDHAC2  |
| 694 | 5  | ENSG00000253873 | PCDHGA11 |
| 695 | 20 | ENSG00000100982 | PCIF1    |
| 696 | 14 | ENSG00000100731 | PCNX     |
| 697 | 7  | ENSG00000106333 | PCOLCE   |
| 698 | 7  | ENSG00000154678 | PDE1C    |
| 699 | 19 | ENSG00000065989 | PDE4A    |
| 700 | 1  | ENSG00000184588 | PDE4B    |
| 701 | 10 | ENSG00000107438 | PDLIM1   |
| 702 | X  | ENSG00000067840 | PDZD4    |
| 703 | 2  | ENSG00000115425 | PECR     |
| 704 | 17 | ENSG00000179094 | PER1     |
| 705 | 6  | ENSG00000112357 | PEX7     |
| 706 | 19 | ENSG00000161031 | PGLYRP2  |
| 707 | 9  | ENSG00000197724 | PHF2     |
| 708 | 6  | ENSG00000118482 | PHF3     |
| 709 | X  | ENSG00000172943 | PHF8     |
| 710 | 6  | ENSG00000146247 | PHIP     |
| 711 | 11 | ENSG00000070047 | PHRF1    |

|     |    |                 |          |
|-----|----|-----------------|----------|
| 712 | 7  | ENSG00000105851 | PIK3CG   |
|     | 19 | ENSG00000105647 |          |
| 713 | 19 | ENSG00000268173 | PIK3R2   |
| 714 | 8  | ENSG00000254093 | PINX1    |
| 715 | X  | ENSG00000087842 | PIR      |
| 716 | 5  | ENSG00000069011 | PITX1    |
| 717 | 19 | ENSG00000011422 | PLAUR    |
| 718 | 20 | ENSG00000182621 | PLCB1    |
| 719 | 3  | ENSG00000187091 | PLCD1    |
| 720 | 6  | ENSG00000198523 | PLN      |
| 721 | 7  | ENSG00000221866 | PLXNA4   |
| 722 | 1  | ENSG00000143442 | POGZ     |
| 723 | 1  | ENSG00000085998 | POMGNT1  |
| 724 | 7  | ENSG00000005421 | PON1     |
| 725 | 7  | ENSG00000128513 | POT1     |
| 726 | 6  | ENSG00000184486 | POU3F2   |
| 727 | 11 | ENSG00000131626 | PPFIA1   |
| 728 | 17 | ENSG00000170836 | PPM1D    |
| 729 | 17 | ENSG00000131771 | PPP1R1B  |
| 730 | X  | ENSG00000049769 | PPP1R3F  |
| 731 | 11 | ENSG00000137713 | PPP2R1B  |
| 732 | 6  | ENSG00000112640 | PPP2R5D  |
| 733 | X  | ENSG00000102103 | PQBP1    |
| 734 | 20 | ENSG00000124126 | PREX1    |
| 735 | 12 | ENSG00000139174 | PRICKLE1 |
| 736 | 3  | ENSG00000163637 | PRICKLE2 |
| 737 | 6  | ENSG00000146143 | PRIM2    |
| 738 | 16 | ENSG00000166501 | PRKCB    |
| 739 | 14 | ENSG00000184304 | PRKD1    |
| 740 | 8  | ENSG00000253729 | PRKDC    |
| 741 | X  | ENSG00000183943 | PRKX     |
| 742 | 22 | ENSG00000100033 | PRODH    |
| 743 | 14 | ENSG00000185246 | PRPF39   |
| 744 | 1  | ENSG00000185888 | PRSS38   |
| 745 | 9  | ENSG00000106772 | PRUNE2   |
| 746 | 8  | ENSG00000156011 | PSD3     |
| 747 | X  | ENSG00000101843 | PSMD10   |
| 748 | 18 | ENSG00000128789 | PSMG2    |
| 749 | 1  | ENSG00000117569 | PTBP2    |
| 750 | X  | ENSG00000165186 | PTCHD1   |
| 751 | 10 | ENSG00000171862 | PTEN     |
| 752 | 1  | ENSG00000050628 | PTGER3   |
| 753 | 1  | ENSG00000073756 | PTGS2    |
| 754 | 6  | ENSG00000112655 | PTK7     |
| 755 | 12 | ENSG00000179295 | PTPN11   |
| 756 | 12 | ENSG00000127329 | PTPRB    |
| 757 | 1  | ENSG00000081237 | PTPRC    |
| 758 | 20 | ENSG00000196090 | PTPRT    |



|     |    |                 |           |
|-----|----|-----------------|-----------|
| 759 | 7  | ENSG00000106278 | PTPRZ1    |
| 760 | 22 | ENSG00000100362 | PVALB     |
| 761 | 2  | ENSG00000130508 | PXDN      |
| 762 | 1  | ENSG00000163564 | PYHIN1    |
| 763 | 2  | ENSG00000135631 | RAB11FIP5 |
| 764 | 7  | ENSG00000146955 | RAB19     |
| 765 | 8  | ENSG00000104388 | RAB2A     |
| 766 | X  | ENSG00000155961 | RAB39B    |
| 767 | 3  | ENSG00000172780 | RAB43     |
| 768 | 8  | ENSG00000164754 | RAD21     |
| 769 | 12 | ENSG00000111247 | RAD51AP1  |
| 770 | 17 | ENSG00000108557 | RAI1      |
| 771 | 5  | ENSG00000204764 | RANBP17   |
| 772 | 2  | ENSG00000091428 | RAPGEF4   |
| 773 | 17 | ENSG00000108551 | RASD1     |
| 774 | 1  | ENSG00000266094 | RASSF5    |
| 775 | 8  | ENSG00000023287 | RB1CC1    |
| 776 | 20 | ENSG00000089050 | RBBP9     |
| 777 | 16 | ENSG00000078328 | RBFOX1    |
| 778 | 5  | ENSG00000091009 | RBM27     |
| 779 | 1  | ENSG00000265241 | RBM8A     |
| 780 | 3  | ENSG00000144642 | RBMS3     |
| 781 | 10 | ENSG00000165476 | REEP3     |
| 782 | 7  | ENSG00000189056 | RELN      |
| 783 | 1  | ENSG00000142599 | RERE      |
| 784 | 19 | ENSG00000079313 | REXO1     |
| 785 | 1  | ENSG00000143207 | RFWD2     |
| 786 | 1  | ENSG00000182901 | RGS7      |
| 787 | X  | ENSG00000101883 | RHOXF1    |
| 788 | 6  | ENSG00000079841 | RIMS1     |
| 789 | 1  | ENSG00000117016 | RIMS3     |
| 790 | 8  | ENSG00000104312 | RIPK2     |
| 791 | 18 | ENSG00000152214 | RIT2      |
| 792 | X  | ENSG00000131263 | RLIM      |
| 793 | 17 | ENSG00000181481 | RNF135    |
| 794 | 3  | ENSG00000163961 | RNF168    |
| 795 | 9  | ENSG00000137075 | RNF38     |
| 796 | 16 | ENSG00000205937 | RNPS1     |
| 797 | 3  | ENSG00000169855 | ROBO1     |
| 798 | 3  | ENSG00000185008 | ROBO2     |
| 799 | 15 | ENSG00000069667 | RORA      |
| 800 | 1  | ENSG00000116745 | RPE65     |
| 801 | 16 | ENSG00000103494 | RPGRIP1L  |
| 802 | X  | ENSG00000147403 | RPL10     |
| 803 | 15 | ENSG00000178718 | RPP25     |
| 804 | 10 | ENSG00000138326 | RPS24     |
| 805 | 6  | ENSG00000071242 | RPS6KA2   |
| 806 | X  | ENSG00000177189 | RPS6KA3   |

|     |    |                 |          |
|-----|----|-----------------|----------|
| 807 | 10 | ENSG00000148484 | RSU1     |
| 808 | 19 | ENSG00000142230 | SAE1     |
| 809 | 2  | ENSG00000119042 | SATB2    |
| 810 | 22 | ENSG00000100241 | SBF1     |
| 811 | 10 | ENSG00000099194 | SCD      |
| 812 | 4  | ENSG00000184178 | SCFD2    |
| 813 | 2  | ENSG00000144285 | SCN1A    |
| 814 | 2  | ENSG00000136531 | SCN2A    |
| 815 | 17 | ENSG00000007314 | SCN4A    |
| 816 | 3  | ENSG00000183873 | SCN5A    |
| 817 | 2  | ENSG00000136546 | SCN7A    |
| 818 | 12 | ENSG00000196876 | SCN8A    |
| 819 | 1  | ENSG00000116171 | SCP2     |
| 820 | 8  | ENSG00000169439 | SDC2     |
| 821 | 7  | ENSG00000146555 | SDK1     |
| 822 | 5  | ENSG00000112902 | SEMA5A   |
| 823 | 5  | ENSG00000164300 | SERINC5  |
| 824 | 7  | ENSG00000106366 | SERPINE1 |
| 825 | 18 | ENSG00000152217 | SETBP1   |
| 826 | 3  | ENSG00000181555 | SETD2    |
| 827 | 3  | ENSG00000168137 | SETD5    |
| 828 | 1  | ENSG00000143379 | SETDB1   |
| 829 | 13 | ENSG00000136169 | SETDB2   |
| 830 | 17 | ENSG00000063015 | SEZ6     |
| 831 | 16 | ENSG00000174938 | SEZ6L2   |
| 832 | 17 | ENSG00000181523 | SGSH     |
| 833 | 22 | ENSG00000100359 | SGSM3    |
| 834 | X  | ENSG00000147010 | SH3KBP1  |
| 835 | 19 | ENSG00000161681 | SHANK1   |
| 836 | 11 | ENSG00000162105 | SHANK2   |
| 837 | 22 | ENSG00000251322 | SHANK3   |
| 838 | X  | ENSG00000185960 | SHOX     |
| 839 | 21 | ENSG00000142178 | SIK1     |
| 840 | 15 | ENSG00000169375 | SIN3A    |
| 841 | 20 | ENSG00000124140 | SLC12A5  |
| 842 | 17 | ENSG00000141526 | SLC16A3  |
| 843 | 12 | ENSG00000118596 | SLC16A7  |
| 844 | 9  | ENSG00000106688 | SLC1A1   |
| 845 | 11 | ENSG00000110436 | SLC1A2   |
| 846 | 1  | ENSG00000163393 | SLC22A15 |
| 847 | 11 | ENSG00000149742 | SLC22A9  |
| 848 | 9  | ENSG00000155886 | SLC24A2  |
| 849 | 2  | ENSG00000115840 | SLC25A12 |
| 850 | X  | ENSG00000102078 | SLC25A14 |
| 851 | 1  | ENSG00000085491 | SLC25A24 |
| 852 | 6  | ENSG00000153291 | SLC25A27 |
| 853 | 9  | ENSG00000167114 | SLC27A4  |
| 854 | 7  | ENSG00000164638 | SLC29A4  |

|     |    |                 |          |
|-----|----|-----------------|----------|
| 855 | 2  | ENSG00000115194 | SLC30A3  |
| 856 | 5  | ENSG00000145740 | SLC30A5  |
| 857 | 3  | ENSG00000169359 | SLC33A1  |
| 858 | 1  | ENSG00000117620 | SLC35A3  |
| 859 | 17 | ENSG00000157637 | SLC38A10 |
| 860 | 17 | ENSG00000133195 | SLC39A11 |
| 861 | 2  | ENSG00000144290 | SLC4A10  |
| 862 | 3  | ENSG00000157103 | SLC6A1   |
| 863 | 5  | ENSG00000142319 | SLC6A3   |
| 864 | 17 | ENSG00000108576 | SLC6A4   |
| 865 | X  | ENSG00000130821 | SLC6A8   |
| 866 | 4  | ENSG00000151012 | SLC7A11  |
| 867 | X  | ENSG00000165349 | SLC7A3   |
| 868 | 19 | ENSG00000118160 | SLC8A2   |
| 869 | X  | ENSG00000198689 | SLC9A6   |
| 870 | 3  | ENSG00000181804 | SLC9A9   |
| 871 | 12 | ENSG00000111700 | SLCO1B3  |
| 872 | 12 | ENSG00000139155 | SLCO1C1  |
| 873 | 5  | ENSG00000184347 | SLIT3    |
| 874 | 13 | ENSG00000165300 | SLITRK5  |
| 875 | 6  | ENSG00000112305 | SMAP1    |
| 876 | 9  | ENSG00000080503 | SMARCA2  |
| 877 | 12 | ENSG00000139613 | SMARCC2  |
| 878 | 10 | ENSG00000108055 | SMC3     |
| 879 | 17 | ENSG00000070366 | SMG6     |
| 880 | 1  | ENSG00000116698 | SMG7     |
| 881 | 16 | ENSG00000103056 | SMPD3    |
| 882 | 20 | ENSG00000132639 | SNAP25   |
| 883 | 7  | ENSG00000197157 | SND1     |
| 884 | 15 | ENSG00000128739 | SNRPN    |
| 885 | 2  | ENSG00000172554 | SNTG2    |
| 886 | 6  | ENSG00000135317 | SNX14    |
| 887 | 11 | ENSG00000120451 | SNX19    |
| 888 | 21 | ENSG00000142168 | SOD1     |
| 889 | 12 | ENSG00000134532 | SOX5     |
| 890 | 1  | ENSG00000155761 | SPAG17   |
| 891 | 4  | ENSG00000152583 | SPARCL1  |
| 892 | 2  | ENSG00000021574 | SPAST    |
| 893 | 4  | ENSG00000164056 | SPRY1    |
| 894 | 2  | ENSG00000277893 | SRD5A2   |
| 895 | 12 | ENSG00000139767 | SRRM4    |
| 896 | 1  | ENSG00000116754 | SRSF11   |
| 897 | 7  | ENSG00000197558 | SSPO     |
| 898 | 7  | ENSG00000004866 | ST7      |
| 899 | 15 | ENSG00000140557 | ST8SIA2  |
| 900 | 2  | ENSG00000115415 | STAT1    |
| 901 | 2  | ENSG00000198648 | STK39    |
| 902 | 7  | ENSG00000106089 | STX1A    |

|     |    |                 |          |
|-----|----|-----------------|----------|
| 903 | 9  | ENSG00000136854 | STXBP1   |
| 904 | 6  | ENSG00000164506 | STXBP5   |
| 905 | 12 | ENSG00000060140 | STYK1    |
| 906 | 3  | ENSG00000172340 | SUCLG2   |
| 907 | 11 | ENSG00000110066 | SUV420H1 |
| 908 | X  | ENSG00000169895 | SYAP1    |
| 909 | X  | ENSG00000008056 | SYN1     |
| 910 | 3  | ENSG00000157152 | SYN2     |
| 911 | 22 | ENSG00000185666 | SYN3     |
| 912 | 6  | ENSG00000131018 | SYNE1    |
| 913 | 6  | ENSG00000197283 | SYNGAP1  |
| 914 | 16 | ENSG00000103528 | SYT17    |
| 915 | 19 | ENSG00000213023 | SYT3     |
| 916 | X  | ENSG00000102362 | SYTL4    |
| 917 | X  | ENSG00000147133 | TAF1     |
| 918 | 16 | ENSG00000103168 | TAF1C    |
| 919 | 9  | ENSG00000122728 | TAF1L    |
| 920 | 7  | ENSG00000106290 | TAF6     |
| 921 | 8  | ENSG00000156787 | TBC1D31  |
| 922 | 3  | ENSG00000131374 | TBC1D5   |
| 923 | 6  | ENSG00000145979 | TBC1D7   |
| 924 | X  | ENSG00000101849 | TBL1X    |
| 925 | 3  | ENSG00000177565 | TBL1XR1  |
| 926 | 2  | ENSG00000136535 | TBR1     |
| 927 | 22 | ENSG00000184058 | TBX1     |
| 928 | 22 | ENSG00000100207 | TCF20    |
| 929 | 19 | ENSG00000071564 | TCF3     |
| 930 | 18 | ENSG00000196628 | TCF4     |
| 931 | 10 | ENSG00000148737 | TCF7L2   |
| 932 | 4  | ENSG00000151790 | TDO2     |
| 933 | 16 | ENSG00000132604 | TERF2    |
| 934 | 5  | ENSG00000164362 | TERT     |
| 935 | 4  | ENSG00000168769 | TET2     |
| 936 | 20 | ENSG00000125780 | TGM3     |
| 937 | 11 | ENSG00000180176 | TH       |
| 938 | 19 | ENSG00000161277 | THAP8    |
| 939 | 15 | ENSG00000137801 | THBS1    |
| 940 | 17 | ENSG00000126351 | THRA     |
| 941 | 17 | ENSG00000146872 | TLK2     |
| 942 | 2  | ENSG00000168955 | TM4SF20  |
| 943 | 16 | ENSG00000205084 | TMEM231  |
| 944 | X  | ENSG00000185973 | TMLHE    |
| 945 | 9  | ENSG00000041982 | TNC      |
| 946 | 4  | ENSG00000168884 | TNIP2    |
| 947 | 1  | ENSG00000120332 | TNN      |
| 948 | 7  | ENSG00000064419 | TNPO3    |
| 949 | 22 | ENSG00000100354 | TNRC6B   |
| 950 | 1  | ENSG00000173726 | TOMM20   |

|     |    |                 |          |
|-----|----|-----------------|----------|
| 951 | 20 | ENSG00000198900 | TOP1     |
| 952 | 22 | ENSG00000100038 | TOP3B    |
| 953 | 12 | ENSG00000139287 | TPH2     |
| 954 | 2  | ENSG00000115705 | TPO      |
| 955 | 2  | ENSG00000171853 | TRAPPC12 |
| 956 | 1  | ENSG00000197323 | TRIM33   |
| 957 | 5  | ENSG00000038382 | TRIO     |
| 958 | 2  | ENSG00000153827 | TRIP12   |
| 959 | 1  | ENSG00000116747 | TROVE2   |
| 960 | 11 | ENSG00000137672 | TRPC6    |
| 961 | 15 | ENSG00000134160 | TRPM1    |
| 962 | 9  | ENSG00000165699 | TSC1     |
| 963 | 16 | ENSG00000103197 | TSC2     |
| 964 | 19 | ENSG00000121297 | TSHZ3    |
| 965 | 2  | ENSG00000211460 | TSN      |
| 966 | X  | ENSG00000156298 | TSPAN7   |
| 967 | 17 | ENSG00000167721 | TSR1     |
| 968 | 8  | ENSG00000129696 | TTI2     |
| 969 | 2  | ENSG00000155657 | TTN      |
| 970 | 12 | ENSG00000167552 | TUBA1A   |
| 971 | 15 | ENSG00000275835 | TUBGCP5  |
| 972 | 11 | ENSG00000077498 | TYR      |
| 973 | 4  | ENSG00000033178 | UBA6     |
| 974 | 7  | ENSG00000186591 | UBE2H    |
| 975 | 15 | ENSG00000114062 | UBE3A    |
| 976 | 12 | ENSG00000151148 | UBE3B    |
| 977 | 7  | ENSG00000009335 | UBE3C    |
| 978 | 15 | ENSG00000138629 | UBL7     |
| 979 | 7  | ENSG00000157741 | UBN2     |
| 980 | 2  | ENSG00000144357 | UBR3     |
| 981 | 8  | ENSG00000104517 | UBR5     |
| 982 | 14 | ENSG00000012963 | UBR7     |
| 983 | 10 | ENSG00000178473 | UCN3     |
| 984 | 9  | ENSG00000198722 | UNC13B   |
| 985 | 2  | ENSG00000144406 | UNC80    |
| 986 | 22 | ENSG00000100024 | UPB1     |
| 987 | 10 | ENSG00000151461 | UPF2     |
| 988 | X  | ENSG00000125351 | UPF3B    |
| 989 | 2  | ENSG00000007001 | UPP2     |
| 990 | 6  | ENSG00000123552 | USP45    |
| 991 | 16 | ENSG00000187555 | USP7     |
| 992 | Y  | ENSG00000114374 | USP9Y    |
| 993 | 6  | ENSG00000152818 | UTRN     |
| 994 | 14 | ENSG00000071246 | VASH1    |
| 995 | 9  | ENSG00000165280 | VCP      |
| 996 | 2  | ENSG00000127831 | VIL1     |
| 997 | 6  | ENSG00000146469 | VIP      |
| 998 | 9  | ENSG00000147852 | VLDLR    |

|      |    |                 |         |
|------|----|-----------------|---------|
| 999  | 8  | ENSG00000132549 | VPS13B  |
| 1000 | X  | ENSG00000155659 | VSIG4   |
| 1001 | 10 | ENSG00000095787 | WAC     |
| 1002 | 4  | ENSG00000163625 | WDFY3   |
| 1003 | 15 | ENSG00000140527 | WDR93   |
| 1004 | 12 | ENSG00000156076 | WIF1    |
| 1005 | X  | ENSG00000196632 | WNK3    |
| 1006 | 12 | ENSG00000125084 | WNT1    |
| 1007 | 7  | ENSG00000105989 | WNT2    |
| 1008 | 16 | ENSG00000186153 | WWOX    |
| 1009 | 3  | ENSG00000168334 | XIRP1   |
| 1010 | 3  | ENSG00000154767 | XPC     |
| 1011 | 2  | ENSG00000082898 | XPO1    |
| 1012 | 3  | ENSG00000163872 | YEATS2  |
| 1013 | 5  | ENSG00000047188 | YTHDC2  |
| 1014 | 17 | ENSG00000108953 | YWHAE   |
| 1015 | 11 | ENSG00000109906 | ZBTB16  |
| 1016 | 3  | ENSG00000181722 | ZBTB20  |
| 1017 | 7  | ENSG00000178381 | ZFAND2A |
| 1018 | 14 | ENSG00000072121 | ZFYVE26 |
| 1019 | 13 | ENSG00000121741 | ZMYM2   |
| 1020 | 10 | ENSG00000015171 | ZMYND11 |
| 1021 | 19 | ENSG00000105497 | ZNF175  |
| 1022 | 17 | ENSG00000154957 | ZNF18   |
| 1023 | 6  | ENSG00000188994 | ZNF292  |
| 1024 | 10 | ENSG00000189180 | ZNF33A  |
| 1025 | 2  | ENSG00000144331 | ZNF385B |
| 1026 | 18 | ENSG00000215421 | ZNF407  |
| 1027 | 14 | ENSG00000119725 | ZNF410  |
| 1028 | 9  | ENSG00000148143 | ZNF462  |
| 1029 | 8  | ENSG00000197363 | ZNF517  |
| 1030 | 19 | ENSG00000188321 | ZNF559  |
| 1031 | 7  | ENSG00000178665 | ZNF713  |
| 1032 | 15 | ENSG00000196391 | ZNF774  |
| 1033 | 19 | ENSG00000278129 | ZNF8    |
| 1034 | 2  | ENSG00000170396 | ZNF804A |
| 1035 | 4  | ENSG00000151612 | ZNF827  |
| 1036 | 1  | ENSG00000162415 | ZSWIM5  |
| 1037 | 15 | ENSG00000174442 | ZWILCH  |

### Intellectual Disability

| Gene Number | Chromosome | Gene ID         | Gene Name |
|-------------|------------|-----------------|-----------|
| 1           | 12         | ENSG00000094914 | AAAS      |
| 2           | 15         | ENSG00000103591 | AAGAB     |
| 3           | 6          | ENSG00000124608 | AARS2     |
| 4           | 7          | ENSG00000008311 | AASS      |
| 5           | 9          | ENSG00000165029 | ABCA1     |

|    |    |                 |          |
|----|----|-----------------|----------|
| 6  | 7  | ENSG00000179869 | ABCA13   |
| 7  | 1  | ENSG00000198691 | ABCA4    |
| 8  | 2  | ENSG00000073734 | ABCB11   |
| 9  | 7  | ENSG00000004846 | ABCB5    |
| 10 | X  | ENSG00000131269 | ABCB7    |
| 11 | 17 | ENSG00000108846 | ABCC3    |
| 12 | 16 | ENSG00000091262 | ABCC6    |
| 13 | 11 | ENSG00000006071 | ABCC8    |
| 14 | 12 | ENSG00000069431 | ABCC9    |
| 15 | X  | ENSG00000101986 | ABCD1    |
| 16 | 12 | ENSG00000173208 | ABCD2    |
| 17 | 14 | ENSG00000119688 | ABCD4    |
| 18 | 4  | ENSG00000118777 | ABCG2    |
| 19 | 3  | ENSG00000011198 | ABHD5    |
| 20 | 17 | ENSG00000278540 | ACACA    |
| 21 | 12 | ENSG00000076555 | ACACB    |
| 22 | 3  | ENSG00000177646 | ACAD9    |
| 23 | 1  | ENSG00000117054 | ACADM    |
| 24 | 12 | ENSG00000122971 | ACADS    |
| 25 | 10 | ENSG00000196177 | ACADSB   |
| 26 | 17 | ENSG00000072778 | ACADVL   |
| 27 | 3  | ENSG00000114331 | ACAP2    |
| 28 | 11 | ENSG00000075239 | ACAT1    |
| 29 | 22 | ENSG00000100412 | ACO2     |
| 30 | 17 | ENSG00000161533 | ACOX1    |
| 31 | 19 | ENSG00000102575 | ACP5     |
| 32 | 19 | ENSG00000142513 | ACPT     |
| 33 | 22 | ENSG00000100312 | ACR      |
| 34 | 16 | ENSG00000176715 | ACSF3    |
| 35 | X  | ENSG00000068366 | ACSL4    |
| 36 | 7  | ENSG00000075624 | ACTB     |
| 37 | 15 | ENSG00000159251 | ACTC1    |
| 38 | 17 | ENSG00000184009 | ACTG1    |
| 39 | 7  | ENSG00000077080 | ACTL6B   |
| 40 | 14 | ENSG00000072110 | ACTN1    |
| 41 | 19 | ENSG00000130402 | ACTN4    |
| 42 | 1  | ENSG00000169717 | ACTRT2   |
| 43 | 2  | ENSG00000115170 | ACVR1    |
| 44 | 3  | ENSG00000243989 | ACY1     |
| 45 | 20 | ENSG00000196839 | ADA      |
| 46 | 1  | ENSG00000134249 | ADAM30   |
| 47 | 19 | ENSG00000142303 | ADAMTS10 |
| 48 | 3  | ENSG00000163638 | ADAMTS9  |
| 49 | 9  | ENSG00000178031 | ADAMTSL1 |
| 50 | 9  | ENSG00000197859 | ADAMTSL2 |
| 51 | 1  | ENSG00000160710 | ADAR     |
| 52 | 19 | ENSG00000213638 | ADAT3    |
| 53 | 1  | ENSG00000163050 | ADCK3    |

|     |    |                 |          |
|-----|----|-----------------|----------|
| 54  | 8  | ENSG00000173137 | ADCK5    |
| 55  | 5  | ENSG00000078295 | ADCY2    |
| 56  | 2  | ENSG00000138031 | ADCY3    |
| 57  | 3  | ENSG00000173175 | ADCY5    |
| 58  | 4  | ENSG00000087274 | ADD1     |
| 59  | 4  | ENSG00000198099 | ADH4     |
| 60  | 10 | ENSG00000156110 | ADK      |
| 61  | 20 | ENSG00000101126 | ADNP     |
| 62  | 2  | ENSG00000274286 | ADRA2B   |
| 63  | 22 | ENSG00000239900 | ADSL     |
| 64  | 4  | ENSG00000196526 | AFAP1    |
|     | X  | ENSG00000155966 |          |
| 65  | X  | ENSG00000281817 | AFF2     |
| 66  | 2  | ENSG00000144218 | AFF3     |
| 67  | 5  | ENSG00000072364 | AFF4     |
| 68  | 18 | ENSG00000141385 | AFG3L2   |
| 69  | 4  | ENSG00000038002 | AGA      |
| 70  | 2  | ENSG00000157985 | AGAP1    |
| 71  | 6  | ENSG00000204305 | AGER     |
| 72  | 7  | ENSG00000006530 | AGK      |
| 73  | 1  | ENSG00000162688 | AGL      |
| 74  | 9  | ENSG00000169692 | AGPAT2   |
| 75  | 2  | ENSG00000018510 | AGPS     |
| 76  | X  | ENSG00000180772 | AGTR2    |
| 77  | 20 | ENSG00000101444 | AHCY     |
| 78  | 1  | ENSG00000126705 | AHDC1    |
| 79  | 6  | ENSG00000135541 | AHI1     |
| 80  | X  | ENSG00000156709 | AIFM1    |
| 81  | 22 | ENSG00000183773 | AIFM3    |
| 82  | 4  | ENSG00000164022 | AIMP1    |
| 83  | 11 | ENSG00000110711 | AIP      |
| 84  | 17 | ENSG00000129221 | AIPL1    |
| 85  | 9  | ENSG00000106992 | AK1      |
| 86  | 1  | ENSG00000004455 | AK2      |
| 87  | 9  | ENSG00000106948 | AKNA     |
| 88  | 1  | ENSG00000162482 | AKR7A3   |
| 89  | 14 | ENSG00000142208 | AKT1     |
| 90  | 1  | ENSG00000117020 | AKT3     |
| 91  | 10 | ENSG00000059573 | ALDH18A1 |
| 92  | 15 | ENSG00000184254 | ALDH1A3  |
| 93  | 9  | ENSG00000137124 | ALDH1B1  |
| 94  | 3  | ENSG00000144908 | ALDH1L1  |
| 95  | 17 | ENSG00000072210 | ALDH3A2  |
| 96  | 1  | ENSG00000159423 | ALDH4A1  |
| 97  | 6  | ENSG00000112294 | ALDH5A1  |
| 98  | 5  | ENSG00000164904 | ALDH7A1  |
| 99  | 1  | ENSG00000143149 | ALDH9A1  |
| 100 | 16 | ENSG00000149925 | ALDOA    |



|     |    |                 |          |
|-----|----|-----------------|----------|
| 101 | 9  | ENSG00000136872 | ALDOB    |
| 102 | 16 | ENSG00000033011 | ALG1     |
| 103 | 22 | ENSG00000182858 | ALG12    |
| 104 | X  | ENSG00000101901 | ALG13    |
| 105 | 9  | ENSG00000119523 | ALG2     |
| 106 | 3  | ENSG00000214160 | ALG3     |
| 107 | 1  | ENSG00000088035 | ALG6     |
| 108 | 11 | ENSG00000159063 | ALG8     |
| 109 | 2  | ENSG00000116127 | ALMS1    |
| 110 | 2  | ENSG00000163295 | ALPI     |
| 111 | 1  | ENSG00000162551 | ALPL     |
| 112 | 3  | ENSG00000178038 | ALS2CL   |
| 113 | 12 | ENSG00000180318 | ALX1     |
| 114 | 1  | ENSG00000156150 | ALX3     |
| 115 | 11 | ENSG00000052850 | ALX4     |
| 116 | X  | ENSG00000184675 | AMER1    |
| 117 | 1  | ENSG00000116337 | AMPD2    |
| 118 | 3  | ENSG00000145020 | AMT      |
| 119 | 4  | ENSG00000145362 | ANK2     |
| 120 | 10 | ENSG00000151150 | ANK3     |
| 121 | 5  | ENSG00000154122 | ANKH     |
| 122 | 16 | ENSG00000167522 | ANKRD11  |
| 123 | 4  | ENSG00000132466 | ANKRD17  |
| 124 | 4  | ENSG00000151458 | ANKRD50  |
| 125 | 3  | ENSG00000160746 | ANO10    |
| 126 | 11 | ENSG00000171714 | ANO5     |
| 127 | 2  | ENSG00000169604 | ANTXR1   |
| 128 | 17 | ENSG00000131480 | AOC2     |
| 129 | 7  | ENSG00000106367 | AP1S1    |
| 130 | X  | ENSG00000182287 | AP1S2    |
| 131 | 5  | ENSG00000132842 | AP3B1    |
| 132 | 1  | ENSG00000134262 | AP4B1    |
| 133 | 15 | ENSG00000081014 | AP4E1    |
| 134 | 7  | ENSG00000221838 | AP4M1    |
| 135 | 14 | ENSG00000100478 | AP4S1    |
| 136 | 12 | ENSG00000120868 | APAF1    |
| 137 | 11 | ENSG00000166181 | API5     |
| 138 | 19 | ENSG00000105290 | APLP1    |
| 139 | 22 | ENSG00000100336 | APOL4    |
| 140 | 14 | ENSG00000256053 | APOPT1   |
| 141 | 9  | ENSG00000137074 | APTX     |
| 142 | 12 | ENSG00000167580 | AQP2     |
| 143 | 11 | ENSG00000186635 | ARAP1    |
| 144 | 8  | ENSG00000066777 | ARFGEF1  |
| 145 | 20 | ENSG00000124198 | ARFGEF2  |
| 146 | 6  | ENSG00000118520 | ARG1     |
| 147 | 2  | ENSG00000075884 | ARHGAP15 |
| 148 | 10 | ENSG00000213390 | ARHGAP19 |

|     |    |                 |          |
|-----|----|-----------------|----------|
| 149 | 11 | ENSG00000137727 | ARHGAP20 |
| 150 | 2  | ENSG00000163219 | ARHGAP25 |
| 151 | 5  | ENSG00000145819 | ARHGAP26 |
| 152 | 3  | ENSG00000031081 | ARHGAP31 |
| 153 | 19 | ENSG00000160007 | ARHGAP35 |
| 154 | 20 | ENSG00000124143 | ARHGAP40 |
| 155 | 17 | ENSG00000141522 | ARHGDI A |
| 156 | 3  | ENSG00000114790 | ARHGEF26 |
| 157 | X  | ENSG00000129675 | ARHGEF6  |
| 158 | X  | ENSG00000131089 | ARHGEF9  |
| 159 | 1  | ENSG00000117713 | ARID1A   |
| 160 | 6  | ENSG00000049618 | ARID1B   |
| 161 | 3  | ENSG00000113966 | ARL6     |
| 162 | 10 | ENSG00000165309 | ARMC3    |
| 163 | 10 | ENSG00000169126 | ARMC4    |
| 164 | 15 | ENSG00000172379 | ARNT2    |
| 165 | 17 | ENSG00000141480 | ARRB2    |
| 166 | 15 | ENSG00000140450 | ARRDC4   |
| 167 | 22 | ENSG00000100299 | ARSA     |
| 168 | 5  | ENSG00000113273 | ARSB     |
| 169 | X  | ENSG00000157399 | ARSE     |
| 170 | X  | ENSG00000004848 | ARX      |
| 171 | 8  | ENSG00000104763 | ASAH1    |
| 172 | 2  | ENSG00000151693 | ASAP2    |
| 173 | 17 | ENSG00000161664 | ASB16    |
| 174 | 7  | ENSG00000126522 | ASL      |
| 175 | 17 | ENSG00000108381 | ASPA     |
| 176 | 8  | ENSG00000198363 | ASPH     |
| 177 | 1  | ENSG00000066279 | ASPM     |
| 178 | 11 | ENSG00000162174 | ASRGL1   |
| 179 | 9  | ENSG00000130707 | ASS1     |
| 180 | 3  | ENSG00000034533 | ASTE1    |
| 181 | 20 | ENSG00000171456 | ASXL1    |
| 182 | 2  | ENSG00000119778 | ATAD2B   |
| 183 | 12 | ENSG00000170653 | ATF7     |
| 184 | 16 | ENSG00000166669 | ATF7IP2  |
| 185 | 5  | ENSG00000152348 | ATG10    |
| 186 | 2  | ENSG00000138363 | ATIC     |
| 187 | 14 | ENSG00000198513 | ATL1     |
| 188 | 11 | ENSG00000149311 | ATM      |
| 189 | 12 | ENSG00000111676 | ATN1     |
| 190 | 5  | ENSG00000118322 | ATP10B   |
| 191 | X  | ENSG00000101974 | ATP11C   |
| 192 | 1  | ENSG00000163399 | ATP1A1   |
| 193 | 1  | ENSG00000018625 | ATP1A2   |
| 194 | 19 | ENSG00000105409 | ATP1A3   |
| 195 | 12 | ENSG00000174437 | ATP2A2   |
| 196 | 12 | ENSG00000070961 | ATP2B1   |

|     |    |                 |          |
|-----|----|-----------------|----------|
| 197 | X  | ENSG00000182220 | ATP6AP2  |
| 198 | 12 | ENSG00000185344 | ATP6V0A2 |
| 199 | 2  | ENSG00000116039 | ATP6V1B1 |
| 200 | 8  | ENSG00000147416 | ATP6V1B2 |
| 201 | X  | ENSG00000165240 | ATP7A    |
| 202 | 4  | ENSG00000124406 | ATP8A1   |
| 203 | 13 | ENSG00000132932 | ATP8A2   |
| 204 | 18 | ENSG00000081923 | ATP8B1   |
| 205 | 3  | ENSG00000175054 | ATR      |
| 206 | X  | ENSG00000085224 | ATRX     |
| 207 | 6  | ENSG00000124788 | ATXN1    |
| 208 | 22 | ENSG00000130638 | ATXN10   |
| 209 | 16 | ENSG00000168488 | ATXN2L   |
| 210 | 14 | ENSG00000066427 | ATXN3    |
| 211 | 9  | ENSG00000148090 | AUH      |
| 212 | 7  | ENSG00000158321 | AUTS2    |
| 213 | X  | ENSG00000126895 | AVPR2    |
| 214 | 1  | ENSG00000162885 | B3GALNT2 |
| 215 | 1  | ENSG00000176022 | B3GALT6  |
| 216 | 13 | ENSG00000187676 | B3GALTL  |
| 217 | 12 | ENSG00000139044 | B4GALNT3 |
| 218 | 11 | ENSG00000182272 | B4GALNT4 |
| 219 | 9  | ENSG00000086062 | B4GALT1  |
| 220 | 5  | ENSG00000027847 | B4GALT7  |
| 221 | 11 | ENSG00000186318 | BACE1    |
| 222 | 1  | ENSG00000121753 | BAI2     |
| 223 | 2  | ENSG00000138376 | BARD1    |
| 224 | 14 | ENSG00000198604 | BAZ1A    |
| 225 | 2  | ENSG00000123636 | BAZ2B    |
| 226 | 10 | ENSG00000214413 | BBIP1    |
| 227 | 11 | ENSG00000174483 | BBS1     |
| 228 | 12 | ENSG00000179941 | BBS10    |
| 229 | 4  | ENSG00000181004 | BBS12    |
| 230 | 16 | ENSG00000125124 | BBS2     |
| 231 | 15 | ENSG00000140463 | BBS4     |
| 232 | 2  | ENSG00000163093 | BBS5     |
| 233 | 4  | ENSG00000138686 | BBS7     |
| 234 | 7  | ENSG00000122507 | BBS9     |
| 235 | 3  | ENSG00000114439 | BBX      |
| 236 | 19 | ENSG00000187244 | BCAM     |
| 237 | X  | ENSG00000185825 | BCAP31   |
| 238 | 20 | ENSG00000064787 | BCAS1    |
| 239 | 12 | ENSG00000060982 | BCAT1    |
| 240 | 19 | ENSG00000248098 | BCKDHA   |
| 241 | 6  | ENSG00000083123 | BCKDHB   |
| 242 | 2  | ENSG00000119866 | BCL11A   |
| 243 | 11 | ENSG00000186174 | BCL9L    |
| 244 | 6  | ENSG00000029363 | BCLAF1   |

|     |    |                 |           |
|-----|----|-----------------|-----------|
| 245 | X  | ENSG00000183337 | BCOR      |
| 246 | X  | ENSG00000085185 | BCORL1    |
| 247 | 2  | ENSG00000074582 | BCS1L     |
| 248 | 20 | ENSG00000125864 | BFSP1     |
| 249 | 3  | ENSG00000170819 | BFSP2     |
| 250 | 3  | ENSG00000134107 | BHLHE40   |
| 251 | 9  | ENSG00000185963 | BICD2     |
| 252 | 2  | ENSG00000136717 | BIN1      |
| 253 | 2  | ENSG00000115760 | BIRC6     |
| 254 | 15 | ENSG00000197299 | BLM       |
| 255 | 14 | ENSG00000125378 | BMP4      |
| 256 | 7  | ENSG00000164619 | BMPER     |
| 257 | 4  | ENSG00000138696 | BMPR1B    |
| 258 | 9  | ENSG00000173068 | BNC2      |
| 259 | 20 | ENSG00000167104 | BPIFB6    |
| 260 | 7  | ENSG00000157764 | BRAF      |
| 261 | 13 | ENSG00000139618 | BRCA2     |
| 262 | 14 | ENSG00000185024 | BRF1      |
| 263 | 17 | ENSG00000136492 | BRIP1     |
| 264 | 21 | ENSG00000185658 | BRWD1     |
| 265 | X  | ENSG00000165288 | BRWD3     |
| 266 | 11 | ENSG00000168000 | BSCL2     |
| 267 | 1  | ENSG00000162399 | BSND      |
| 268 | 6  | ENSG00000183826 | BTBD9     |
| 269 | 3  | ENSG00000169814 | BTD       |
| 270 | 6  | ENSG00000124557 | BTN1A1    |
| 271 | 5  | ENSG00000113303 | BTNL8     |
| 272 | 15 | ENSG00000156970 | BUB1B     |
| 273 | 10 | ENSG00000148655 | C10orf11  |
| 274 | 10 | ENSG00000107815 | C10orf2   |
| 275 | 12 | ENSG00000111678 | C12orf57  |
| 276 | 12 | ENSG00000130921 | C12orf65  |
| 277 | 17 | ENSG00000181013 | C17orf47  |
| 278 | 18 | ENSG00000206043 | C18orf63  |
| 279 | 19 | ENSG00000131944 | C19orf40  |
| 280 | 19 | ENSG00000132016 | C19orf57  |
| 281 | 1  | ENSG00000162384 | C1orf123  |
| 282 | 1  | ENSG00000203963 | C1orf141  |
| 283 | 20 | ENSG00000125531 | C20orf195 |
| 284 | 11 | ENSG00000168014 | C2CD3     |
| 285 | 2  | ENSG00000115998 | C2orf42   |
| 286 | 2  | ENSG00000179270 | C2orf71   |
| 287 | 1  | ENSG00000123838 | C4BPA     |
| 288 | 4  | ENSG00000174792 | C4orf26   |
| 289 | 4  | ENSG00000181215 | C4orf50   |
| 290 | 5  | ENSG00000197603 | C5orf42   |
| 291 | 6  | ENSG00000204296 | C6orf10   |
| 292 | 8  | ENSG00000156172 | C8orf37   |

|     |    |                 |         |
|-----|----|-----------------|---------|
| 293 | 8  | ENSG00000104267 | CA2     |
| 294 | X  | ENSG00000169239 | CA5B    |
| 295 | 8  | ENSG00000178538 | CA8     |
| 296 | 19 | ENSG00000141837 | CACNA1A |
| 297 | 12 | ENSG00000151067 | CACNA1C |
| 298 | 3  | ENSG00000157388 | CACNA1D |
| 299 | 1  | ENSG00000198216 | CACNA1E |
| 300 | 17 | ENSG00000006283 | CACNA1G |
| 301 | 16 | ENSG00000196557 | CACNA1H |
| 302 | 16 | ENSG00000006116 | CACNG3  |
| 303 | 14 | ENSG00000198668 | CALM1   |
| 304 | 15 | ENSG00000129007 | CALML4  |
| 305 | 5  | ENSG00000070808 | CAMK2A  |
| 306 | 7  | ENSG00000058404 | CAMK2B  |
| 307 | 19 | ENSG00000076826 | CAMSAP3 |
| 308 | 1  | ENSG00000171735 | CAMTA1  |
| 309 | 17 | ENSG00000171302 | CANT1   |
| 310 | 1  | ENSG00000203697 | CAPN8   |
| 311 | 1  | ENSG00000116489 | CAPZA1  |
| 312 | 17 | ENSG00000141527 | CARD14  |
| 313 | 12 | ENSG00000118307 | CASC1   |
| 314 | 15 | ENSG00000137812 | CASC5   |
| 315 | X  | ENSG00000147044 | CASK    |
| 316 | 17 | ENSG00000177303 | CASKIN2 |
| 317 | 10 | ENSG00000165806 | CASP7   |
| 318 | 1  | ENSG00000132906 | CASP9   |
| 319 | 16 | ENSG00000129993 | CBFA2T3 |
| 320 | 11 | ENSG00000110395 | CBL     |
| 321 | 7  | ENSG00000105879 | CBLL1   |
|     | 21 | ENSG00000160200 |         |
| 322 | 21 | ENSG00000274276 | CBS     |
| 323 | 12 | ENSG00000094916 | CBX5    |
| 324 | 19 | ENSG00000132024 | CC2D1A  |
| 325 | 4  | ENSG00000048342 | CC2D2A  |
| 326 | 18 | ENSG00000183287 | CCBE1   |
| 327 | 17 | ENSG00000167131 | CCDC103 |
| 328 | 19 | ENSG00000105479 | CCDC114 |
| 329 | 7  | ENSG00000004766 | CCDC132 |
| 330 | 1  | ENSG00000122483 | CCDC18  |
| 331 | X  | ENSG00000101997 | CCDC22  |
| 332 | 1  | ENSG00000160050 | CCDC28B |
| 333 | 3  | ENSG00000173421 | CCDC36  |
| 334 | 3  | ENSG00000145075 | CCDC39  |
| 335 | 17 | ENSG00000141519 | CCDC40  |
| 336 | 12 | ENSG00000139537 | CCDC65  |
| 337 | 16 | ENSG00000162004 | CCDC78  |
| 338 | 2  | ENSG00000115355 | CCDC88A |
| 339 | 14 | ENSG00000015133 | CCDC88C |

|     |    |                 |          |
|-----|----|-----------------|----------|
| 340 | 11 | ENSG00000179071 | CCDC89   |
| 341 | 6  | ENSG00000112576 | CCND3    |
| 342 | 1  | ENSG00000221978 | CCNL2    |
| 343 | 12 | ENSG00000166226 | CCT2     |
| 344 | 1  | ENSG00000134256 | CD101    |
| 345 | 1  | ENSG00000122223 | CD244    |
| 346 | 9  | ENSG00000120217 | CD274    |
| 347 | 17 | ENSG00000186074 | CD300LF  |
| 348 | 19 | ENSG00000117877 | CD3EAP   |
| 349 | 20 | ENSG00000101017 | CD40     |
| 350 | 1  | ENSG00000116815 | CD58     |
| 351 | 13 | ENSG00000102543 | CDADC1   |
| 352 | 15 | ENSG00000140326 | CDAN1    |
| 353 | 1  | ENSG00000143776 | CDC42BPA |
| 354 | 14 | ENSG00000198752 | CDC42BPB |
| 355 | 17 | ENSG00000094804 | CDC6     |
| 356 | 16 | ENSG00000129910 | CDH15    |
| 357 | 10 | ENSG00000107736 | CDH23    |
| 358 | 16 | ENSG00000062038 | CDH3     |
| 359 | 16 | ENSG00000185324 | CDK10    |
| 360 | 7  | ENSG00000065883 | CDK13    |
| 361 | 20 | ENSG00000101391 | CDK5RAP1 |
| 362 | 9  | ENSG00000136861 | CDK5RAP2 |
| 363 | 7  | ENSG00000105810 | CDK6     |
| 364 | 6  | ENSG00000145996 | CDKAL1   |
| 365 | 2  | ENSG00000205111 | CDKL4    |
| 366 | X  | ENSG00000008086 | CDKL5    |
| 367 | 11 | ENSG00000129757 | CDKN1C   |
| 368 | 11 | ENSG00000064309 | CDON     |
| 369 | 16 | ENSG00000167513 | CDT1     |
| 370 | 16 | ENSG00000166446 | CDYL2    |
| 371 | 19 | ENSG00000007129 | CEACAM21 |
| 372 | 19 | ENSG00000105352 | CEACAM4  |
| 373 | 19 | ENSG00000086548 | CEACAM6  |
| 374 | 22 | ENSG00000075275 | CELSR1   |
| 375 | 1  | ENSG00000117724 | CENPF    |
| 376 | 13 | ENSG00000151849 | CENPJ    |
| 377 | 4  | ENSG00000174799 | CEP135   |
| 378 | 15 | ENSG00000103995 | CEP152   |
| 379 | 11 | ENSG00000110274 | CEP164   |
| 380 | 3  | ENSG00000174007 | CEP19    |
| 381 | 18 | ENSG00000101639 | CEP192   |
| 382 | 12 | ENSG00000198707 | CEP290   |
| 383 | 7  | ENSG00000106477 | CEP41    |
| 384 | 11 | ENSG00000166037 | CEP57    |
| 385 | 3  | ENSG00000182923 | CEP63    |
| 386 | 12 | ENSG00000173588 | CEP83    |
| 387 | 1  | ENSG00000130695 | CEP85    |

|     |    |                 |         |
|-----|----|-----------------|---------|
| 388 | 17 | ENSG00000258890 | CEP95   |
| 389 | 19 | ENSG00000223802 | CERS1   |
| 390 | 15 | ENSG00000128849 | CGNL1   |
| 391 | 19 | ENSG00000167670 | CHAF1A  |
| 392 | 13 | ENSG00000198824 | CHAMP1  |
| 393 | 10 | ENSG00000070748 | CHAT    |
| 394 | 15 | ENSG00000173575 | CHD2    |
| 395 | 17 | ENSG00000170004 | CHD3    |
| 396 | 12 | ENSG00000111642 | CHD4    |
| 397 | 8  | ENSG00000171316 | CHD7    |
| 398 | 11 | ENSG00000149554 | CHEK1   |
| 399 | 22 | ENSG00000100288 | CHKB    |
| 400 | X  | ENSG00000188419 | CHM     |
| 401 | 16 | ENSG00000131165 | CHMP1A  |
| 402 | X  | ENSG00000101938 | CHRD1   |
| 403 | 11 | ENSG00000180720 | CHRM4   |
| 404 | 11 | ENSG00000129749 | CHRNA10 |
| 405 | 20 | ENSG00000101204 | CHRNA4  |
| 406 | 2  | ENSG00000135902 | CHRND   |
| 407 | 15 | ENSG00000169105 | CHST14  |
| 408 | 10 | ENSG00000122863 | CHST3   |
| 409 | 15 | ENSG00000131873 | CHSY1   |
| 410 | 10 | ENSG00000213341 | CHUK    |
| 411 | 15 | ENSG00000136425 | CIB2    |
| 412 | 12 | ENSG00000122966 | CIT     |
| 413 | 2  | ENSG00000169607 | CKAP2L  |
| 414 | 1  | ENSG00000016490 | CLCA1   |
| 415 | X  | ENSG00000073464 | CLCN4   |
| 416 | 1  | ENSG00000011021 | CLCN6   |
| 417 | 16 | ENSG00000103249 | CLCN7   |
| 418 | 1  | ENSG00000186510 | CLCNKA  |
| 419 | 1  | ENSG00000184908 | CLCNKB  |
| 420 | 21 | ENSG00000159261 | CLDN14  |
| 421 | 1  | ENSG00000164007 | CLDN19  |
| 422 | X  | ENSG00000155962 | CLIC2   |
|     | 16 | ENSG00000188603 |         |
| 423 | 16 | ENSG00000261832 | CLN3    |
| 424 | 13 | ENSG00000102805 | CLN5    |
| 425 | 8  | ENSG00000182372 | CLN8    |
| 426 | 4  | ENSG00000109684 | CLNK    |
| 427 | 11 | ENSG00000162129 | CLPB    |
| 428 | 19 | ENSG00000125656 | CLPP    |
| 429 | 15 | ENSG00000166855 | CLPX    |
| 430 | 4  | ENSG00000249581 | CLRN2   |
| 431 | 12 | ENSG00000139182 | CLSTN3  |
| 432 | 17 | ENSG00000141367 | CLTC    |
| 433 | 22 | ENSG00000070371 | CLTCL1  |
| 434 | 16 | ENSG00000153815 | CMIP    |

|     |    |                 |            |
|-----|----|-----------------|------------|
| 435 | 3  | ENSG00000169714 | CNBP       |
| 436 | X  | ENSG00000149970 | CNKS2R2    |
| 437 | 19 | ENSG00000064666 | CNN2       |
| 438 | 10 | ENSG00000148842 | CNNM2      |
| 439 | 2  | ENSG00000158158 | CNNM4      |
| 440 | 16 | ENSG00000125107 | CNOT1      |
| 441 | 12 | ENSG00000111596 | CNOT2      |
| 442 | 19 | ENSG00000088038 | CNOT3      |
| 443 | 5  | ENSG00000155508 | CNOT8      |
| 444 | 11 | ENSG00000149972 | CNTN5      |
| 445 | 7  | ENSG00000174469 | CNTNAP2    |
| 446 | 16 | ENSG00000152910 | CNTNAP4    |
| 447 | 2  | ENSG00000183513 | COA5       |
| 448 | 17 | ENSG00000166685 | COG1       |
| 449 | 16 | ENSG00000103051 | COG4       |
| 450 | 13 | ENSG00000133103 | COG6       |
| 451 | 16 | ENSG00000168434 | COG7       |
| 452 | 16 | ENSG00000213380 | COG8       |
| 453 | 6  | ENSG00000123500 | COL10A1    |
| 454 | 1  | ENSG00000060718 | COL11A1    |
| 455 | 6  | ENSG00000204248 | COL11A2    |
| 456 | 21 | ENSG00000182871 | COL18A1    |
| 457 | 17 | ENSG00000108821 | COL1A1     |
| 458 | 12 | ENSG00000139219 | COL2A1     |
| 459 | 2  | ENSG00000168542 | COL3A1     |
| 460 | 13 | ENSG00000187498 | COL4A1     |
| 461 | 13 | ENSG00000134871 | COL4A2     |
| 462 | 13 | ENSG00000224821 | COL4A2-AS2 |
| 463 | 2  | ENSG00000169031 | COL4A3     |
| 464 | 5  | ENSG00000113163 | COL4A3BP   |
| 465 | 2  | ENSG00000081052 | COL4A4     |
| 466 | 9  | ENSG00000130635 | COL5A1     |
| 467 | 19 | ENSG00000080573 | COL5A3     |
| 468 | 3  | ENSG00000144810 | COL8A1     |
| 469 | 6  | ENSG00000112280 | COL9A1     |
| 470 | 1  | ENSG00000049089 | COL9A2     |
| 471 | 20 | ENSG00000092758 | COL9A3     |
| 472 | 2  | ENSG00000118004 | COLEC11    |
| 473 | 3  | ENSG00000206561 | COLQ       |
| 474 | 19 | ENSG00000105664 | COMP       |
| 475 | 4  | ENSG00000173085 | COQ2       |
| 476 | 16 | ENSG00000088682 | COQ9       |
| 477 | 17 | ENSG00000006695 | COX10      |
| 478 | 17 | ENSG00000166260 | COX11      |
| 479 | 12 | ENSG00000178449 | COX14      |
| 480 | 10 | ENSG00000014919 | COX15      |
| 481 | 1  | ENSG00000203667 | COX20      |
| 482 | 19 | ENSG00000126267 | COX6B1     |



|     |    |                 |         |
|-----|----|-----------------|---------|
| 483 | X  | ENSG00000131174 | COX7B   |
| 484 | 4  | ENSG00000168993 | CPLX1   |
| 485 | 3  | ENSG00000196353 | CPNE4   |
| 486 | 2  | ENSG00000021826 | CPS1    |
| 487 | 7  | ENSG00000160917 | CPSF4   |
| 488 | 1  | ENSG00000134376 | CRB1    |
| 489 | 3  | ENSG00000113851 | CRBN    |
| 490 | 2  | ENSG00000118260 | CREB1   |
| 491 | 16 | ENSG00000005339 | CREBBP  |
| 492 | 19 | ENSG00000006016 | CRLF1   |
| 493 | 19 | ENSG00000105392 | CRX     |
| 494 | 11 | ENSG00000121671 | CRY2    |
|     | 21 | ENSG00000160202 |         |
| 495 | 21 | ENSG00000276076 | CRYAA   |
| 496 | 17 | ENSG00000108255 | CRYBA1  |
| 497 | 22 | ENSG00000196431 | CRYBA4  |
| 498 | 22 | ENSG00000100122 | CRYBB1  |
| 499 | 22 | ENSG00000244752 | CRYBB2  |
| 500 | 22 | ENSG00000100053 | CRYBB3  |
| 501 | 2  | ENSG00000163254 | CRYGC   |
| 502 | 2  | ENSG00000118231 | CRYGD   |
| 503 | 20 | ENSG00000101266 | CSNK2A1 |
| 504 | 8  | ENSG00000104218 | CSPP1   |
| 505 | 21 | ENSG00000160213 | CSTB    |
| 506 | 20 | ENSG00000101138 | CSTF1   |
| 507 | 4  | ENSG00000159692 | CTBP1   |
| 508 | 10 | ENSG00000175029 | CTBP2   |
| 509 | 17 | ENSG00000178971 | CTC1    |
| 510 | 16 | ENSG00000102974 | CTCF    |
| 511 | 18 | ENSG00000060069 | CTDP1   |
| 512 | 1  | ENSG00000116761 | CTH     |
| 513 | 3  | ENSG00000168036 | CTNNB1  |
| 514 | 17 | ENSG00000040531 | CTNS    |
| 515 | 16 | ENSG00000168925 | CTRB1   |
| 516 | 20 | ENSG00000064601 | CTSA    |
| 517 | 8  | ENSG00000164733 | CTSB    |
| 518 | 11 | ENSG00000117984 | CTSD    |
| 519 | 1  | ENSG00000143387 | CTSK    |
| 520 | 20 | ENSG00000101160 | CTSZ    |
| 521 | 10 | ENSG00000107611 | CUBN    |
| 522 | 2  | ENSG00000036257 | CUL3    |
| 523 | X  | ENSG00000158290 | CUL4B   |
| 524 | 6  | ENSG00000044090 | CUL7    |
| 525 | 6  | ENSG00000112659 | CUL9    |
| 526 | 12 | ENSG00000111249 | CUX2    |
| 527 | 10 | ENSG00000095485 | CWF19L1 |
| 528 | X  | ENSG00000147113 | CXorf36 |
| 529 | 18 | ENSG00000166347 | CYB5A   |

|     |    |                 |         |
|-----|----|-----------------|---------|
| 530 | 22 | ENSG00000100243 | CYB5R3  |
| 531 | 8  | ENSG00000179091 | CYC1    |
| 532 | 5  | ENSG00000055163 | CYFIP2  |
| 533 | 2  | ENSG00000138061 | CYP1B1  |
| 534 | 10 | ENSG00000095596 | CYP26A1 |
| 535 | 2  | ENSG00000003137 | CYP26B1 |
| 536 | 2  | ENSG00000135929 | CYP27A1 |
| 537 | 2  | ENSG00000186684 | CYP27C1 |
| 538 | 4  | ENSG00000155016 | CYP2U1  |
| 539 | 2  | ENSG00000180902 | D2HGDH  |
| 540 | 14 | ENSG00000100592 | DAAM1   |
| 541 | 3  | ENSG00000173402 | DAG1    |
| 542 | 3  | ENSG00000178149 | DALRD3  |
| 543 | 2  | ENSG00000115866 | DARS    |
| 544 | 1  | ENSG00000117593 | DARS2   |
| 545 | 1  | ENSG00000137992 | DBT     |
| 546 | 2  | ENSG00000115827 | DCAF17  |
| 547 | 17 | ENSG00000136485 | DCAF7   |
| 548 | 11 | ENSG00000166341 | DCHS1   |
| 549 | 4  | ENSG00000197410 | DCHS2   |
| 550 | X  | ENSG00000077279 | DCX     |
| 551 | 1  | ENSG00000153904 | DDAH1   |
| 552 | 11 | ENSG00000134574 | DDB2    |
| 553 | 7  | ENSG00000132437 | DDC     |
| 554 | 14 | ENSG00000100523 | DDHD1   |
| 555 | 8  | ENSG00000085788 | DDHD2   |
| 556 | 1  | ENSG00000244038 | DDOST   |
| 557 | 1  | ENSG00000162733 | DDR2    |
| 558 | 12 | ENSG00000013573 | DDX11   |
| 559 | 6  | ENSG00000198563 | DDX39B  |
| 560 | X  | ENSG00000215301 | DDX3X   |
| 561 | 5  | ENSG00000145833 | DDX46   |
| 562 | 1  | ENSG00000118197 | DDX59   |
| 563 | 4  | ENSG00000137628 | DDX60   |
| 564 | 4  | ENSG00000181381 | DDX60L  |
| 565 | 11 | ENSG00000177030 | DEAF1   |
| 566 | 11 | ENSG00000184014 | DENND5A |
| 567 | 22 | ENSG00000100150 | DEPDC5  |
| 568 | 2  | ENSG00000204311 | DFNB59  |
| 569 | 22 | ENSG00000100056 | DGCR14  |
| 570 | 22 | ENSG00000070413 | DGCR2   |
| 571 | 22 | ENSG00000183628 | DGCR6   |
| 572 | 22 | ENSG00000128191 | DGCR8   |
| 573 | 1  | ENSG00000116133 | DHCR24  |
| 574 | 11 | ENSG00000172893 | DHCR7   |
| 575 | 19 | ENSG00000104808 | DHDH    |
| 576 | 5  | ENSG00000228716 | DHFR    |
| 577 | 16 | ENSG00000102967 | DHODH   |

|     |    |                 |         |
|-----|----|-----------------|---------|
| 578 | 10 | ENSG00000181192 | DHTKD1  |
| 579 | 3  | ENSG00000132153 | DHX30   |
| 580 | 10 | ENSG00000089876 | DHX32   |
| 581 | 3  | ENSG00000174953 | DHX36   |
| 582 | 17 | ENSG00000108406 | DHX40   |
| 583 | 13 | ENSG00000139734 | DIAPH3  |
| 584 | 15 | ENSG00000166938 | DIS3L   |
| 585 | 2  | ENSG00000144535 | DIS3L2  |
| 586 | 1  | ENSG00000162946 | DISC1   |
| 587 | X  | ENSG00000130826 | DKC1    |
| 588 | 19 | ENSG00000104901 | DKKL1   |
| 589 | 11 | ENSG00000150768 | DLAT    |
| 590 | 7  | ENSG00000091140 | DLD     |
| 591 | X  | ENSG00000082458 | DLG3    |
| 592 | 17 | ENSG00000132535 | DLG4    |
| 593 | 10 | ENSG00000151208 | DLG5    |
| 594 | 18 | ENSG00000170579 | DLGAP1  |
| 595 | 19 | ENSG00000090932 | DLL3    |
| 596 | X  | ENSG00000198947 | DMD     |
| 597 | 4  | ENSG00000152592 | DMP1    |
| 598 | 19 | ENSG00000104936 | DMPK    |
| 599 | 9  | ENSG00000064218 | DMRT3   |
| 600 | 5  | ENSG00000172869 | DMXL1   |
| 601 | 15 | ENSG00000104093 | DMXL2   |
| 602 | 10 | ENSG00000138346 | DNA2    |
| 603 | 19 | ENSG00000167646 | DNAAF3  |
| 604 | 12 | ENSG00000197653 | DNAH10  |
| 605 | 7  | ENSG00000105877 | DNAH11  |
| 606 | 3  | ENSG00000174844 | DNAH12  |
| 607 | 17 | ENSG00000187775 | DNAH17  |
| 608 | 5  | ENSG00000039139 | DNAH5   |
| 609 | 2  | ENSG00000115423 | DNAH6   |
| 610 | 2  | ENSG00000118997 | DNAH7   |
| 611 | 6  | ENSG00000124721 | DNAH8   |
| 612 | 17 | ENSG00000171595 | DNAI2   |
| 613 | 10 | ENSG00000136770 | DNAJC1  |
| 614 | 3  | ENSG00000205981 | DNAJC19 |
| 615 | 1  | ENSG00000116675 | DNAJC6  |
| 616 | 9  | ENSG00000106976 | DNM1    |
| 617 | 19 | ENSG00000130816 | DNMT1   |
| 618 | 2  | ENSG00000119772 | DNMT3A  |
| 619 | 20 | ENSG00000088305 | DNMT3B  |
| 620 | 2  | ENSG00000123992 | DNPEP   |
| 621 | 16 | ENSG00000149927 | DOC2A   |
| 622 | 3  | ENSG00000088538 | DOCK3   |
| 623 | 19 | ENSG00000130158 | DOCK6   |
| 624 | 9  | ENSG00000107099 | DOCK8   |
| 625 | 9  | ENSG00000175283 | DOLK    |

|     |    |                 |          |
|-----|----|-----------------|----------|
| 626 | 19 | ENSG00000104885 | DOT1L    |
| 627 | 11 | ENSG00000172269 | DPAGT1   |
| 628 | 20 | ENSG00000000419 | DPM1     |
| 629 | 2  | ENSG00000197635 | DPP4     |
| 630 | 19 | ENSG00000142002 | DPP9     |
| 631 | 1  | ENSG00000188641 | DPYD     |
| 632 | 1  | ENSG00000232542 | DPYD-IT1 |
| 633 | 8  | ENSG00000147647 | DPYS     |
| 634 | 2  | ENSG00000157851 | DPYSL5   |
| 635 | 11 | ENSG00000149295 | DRD2     |
| 636 | 21 | ENSG00000184029 | DSCR4    |
| 637 | 6  | ENSG00000096696 | DSP      |
| 638 | 4  | ENSG00000152591 | DSPP     |
| 639 | 6  | ENSG00000151914 | DST      |
| 640 | 1  | ENSG00000133059 | DSTYK    |
| 641 | 5  | ENSG00000169570 | DTWD2    |
| 642 | 11 | ENSG00000110042 | DTX4     |
| 643 | 15 | ENSG00000140274 | DUOXA2   |
| 644 | 17 | ENSG00000276023 | DUSP14   |
| 645 | 1  | ENSG00000107404 | DVL1     |
| 646 | 18 | ENSG00000141627 | DYM      |
| 647 | 14 | ENSG00000197102 | DYNC1H1  |
| 648 | 16 | ENSG00000135720 | DYNC1LI2 |
| 649 | 11 | ENSG00000187240 | DYNC2H1  |
| 650 | 21 | ENSG00000157540 | DYRK1A   |
| 651 | 19 | ENSG00000105204 | DYRK1B   |
| 652 | 15 | ENSG00000256061 | DYX1C1   |
| 653 | 10 | ENSG00000108001 | EBF3     |
| 654 | X  | ENSG00000147155 | EBP      |
| 655 | 1  | ENSG00000117298 | ECE1     |
| 656 | 2  | ENSG00000171551 | ECEL1    |
| 657 | 19 | ENSG00000104823 | ECH1     |
| 658 | 1  | ENSG00000121310 | ECHDC2   |
| 659 | 6  | ENSG00000203734 | ECT2L    |
| 660 | X  | ENSG00000158813 | EDA      |
| 661 | 15 | ENSG00000179151 | EDC3     |
| 662 | 13 | ENSG00000136160 | EDNRB    |
| 663 | 11 | ENSG00000074266 | EED      |
| 664 | 20 | ENSG00000101210 | EEF1A2   |
| 665 | 20 | ENSG00000215529 | EFCAB8   |
| 666 | X  | ENSG00000090776 | EFNB1    |
| 667 | 17 | ENSG00000108883 | EFTUD2   |
| 668 | 3  | ENSG00000206120 | EGFEM1P  |
| 669 | 2  | ENSG00000115504 | EHBP1    |
| 670 | 9  | ENSG00000181090 | EHMT1    |
| 671 | 2  | ENSG00000172071 | EIF2AK3  |
| 672 | 22 | ENSG00000100129 | EIF3L    |
| 673 | 17 | ENSG00000141543 | EIF4A3   |

|     |    |                 |        |
|-----|----|-----------------|--------|
| 674 | 3  | ENSG00000114867 | EIF4G1 |
| 675 | 11 | ENSG00000110321 | EIF4G2 |
| 676 | 3  | ENSG00000163577 | EIF5A2 |
| 677 | 20 | ENSG00000242372 | EIF6   |
| 678 | 17 | ENSG00000006744 | ELAC2  |
| 679 | 7  | ENSG00000049540 | ELN    |
| 680 | 6  | ENSG00000118402 | ELOVL4 |
| 681 | 7  | ENSG00000164778 | EN2    |
| 682 | 1  | ENSG00000154380 | ENAH   |
| 683 | 12 | ENSG00000111674 | ENO2   |
| 684 | 13 | ENSG00000120658 | ENOX1  |
| 685 | 6  | ENSG00000197594 | ENPP1  |
| 686 | 3  | ENSG00000163378 | EOGT   |
| 687 | 22 | ENSG00000100393 | EP300  |
| 688 | 2  | ENSG00000135999 | EPC2   |
| 689 | 18 | ENSG00000152223 | EPG5   |
| 690 | 4  | ENSG00000145242 | EPHA5  |
| 691 | 1  | ENSG00000133216 | EPHB2  |
| 692 | 8  | ENSG00000261150 | EPPK1  |
| 693 | 1  | ENSG00000198758 | EPS8L3 |
| 694 | 17 | ENSG00000121053 | EPX    |
| 695 | 2  | ENSG00000178568 | ERBB4  |
| 696 | 19 | ENSG00000012061 | ERCC1  |
| 697 | 19 | ENSG00000104884 | ERCC2  |
| 698 | 2  | ENSG00000163161 | ERCC3  |
| 699 | 16 | ENSG00000175595 | ERCC4  |
| 700 | 13 | ENSG00000134899 | ERCC5  |
| 701 | 10 | ENSG00000225830 | ERCC6  |
| 702 | X  | ENSG00000186871 | ERCC6L |
| 703 | 5  | ENSG00000049167 | ERCC8  |
| 704 | 19 | ENSG00000105722 | ERF    |
| 705 | 8  | ENSG00000147475 | ERLIN2 |
| 706 | 16 | ENSG00000134398 | ERN2   |
| 707 | 8  | ENSG00000171320 | ESCO2  |
| 708 | 12 | ENSG00000135476 | ESPL1  |
| 709 | 1  | ENSG00000187017 | ESPN   |
| 710 | 14 | ENSG00000119715 | ESRRB  |
| 711 | 5  | ENSG00000120705 | ETF1   |
| 712 | 15 | ENSG00000140374 | ETFA   |
| 713 | 19 | ENSG00000105379 | ETFB   |
| 714 | 4  | ENSG00000171503 | ETFDH  |
| 715 | 19 | ENSG00000105755 | ETHE1  |
| 716 | 4  | ENSG00000072840 | EVC    |
| 717 | 4  | ENSG00000173040 | EVC2   |
| 718 | 1  | ENSG00000067208 | EVI5   |
| 719 | 6  | ENSG00000112685 | EXOC2  |
| 720 | 17 | ENSG00000182473 | EXOC7  |
| 721 | 9  | ENSG00000107371 | EXOSC3 |

|     |    |                 |         |
|-----|----|-----------------|---------|
| 722 | 19 | ENSG00000077348 | EXOSC5  |
| 723 | 8  | ENSG00000182197 | EXT1    |
| 724 | 11 | ENSG00000151348 | EXT2    |
| 725 | 8  | ENSG00000104313 | EYA1    |
| 726 | 6  | ENSG00000112319 | EYA4    |
| 727 | 7  | ENSG00000106462 | EZH2    |
| 728 | 11 | ENSG00000180210 | F2      |
| 729 | 13 | ENSG00000057593 | F7      |
| 730 | 11 | ENSG00000221968 | FADS3   |
| 731 | 15 | ENSG00000103876 | FAH     |
| 732 | 5  | ENSG00000145569 | FAM105A |
| 733 | 11 | ENSG00000166801 | FAM111A |
| 734 | 7  | ENSG00000122591 | FAM126A |
| 735 | 5  | ENSG00000154153 | FAM134B |
| 736 | 5  | ENSG00000113391 | FAM172A |
| 737 | 10 | ENSG00000119906 | FAM178A |
| 738 | 1  | ENSG00000116199 | FAM20B  |
| 739 | 7  | ENSG00000177706 | FAM20C  |
| 740 | 4  | ENSG00000189157 | FAM47E  |
| 741 | X  | ENSG00000262919 | FAM58A  |
| 742 | 20 | ENSG00000042062 | FAM65C  |
| 743 | 9  | ENSG00000165716 | FAM69B  |
| 744 | 11 | ENSG00000077458 | FAM76B  |
| 745 | 8  | ENSG00000180921 | FAM83H  |
| 746 | 4  | ENSG00000251669 | FAM86EP |
| 747 | 8  | ENSG00000182366 | FAM87A  |
| 748 | 2  | ENSG00000119812 | FAM98A  |
| 749 | 16 | ENSG00000187741 | FANCA   |
| 750 | X  | ENSG00000181544 | FANCB   |
| 751 | 9  | ENSG00000158169 | FANCC   |
| 752 | 3  | ENSG00000144554 | FANCD2  |
| 753 | 6  | ENSG00000112039 | FANCE   |
| 754 | 11 | ENSG00000183161 | FANCF   |
| 755 | 9  | ENSG00000221829 | FANCG   |
| 756 | 15 | ENSG00000140525 | FANCI   |
| 757 | 11 | ENSG00000197601 | FAR1    |
| 758 | 6  | ENSG00000145982 | FARS2   |
| 759 | 2  | ENSG00000118246 | FASTKD2 |
| 760 | 4  | ENSG00000196159 | FAT4    |
| 761 | 19 | ENSG00000105202 | FBL     |
| 762 | 15 | ENSG00000166147 | FBN1    |
| 763 | 5  | ENSG00000138829 | FBN2    |
| 764 | 9  | ENSG00000165140 | FBP1    |
| 765 | 16 | ENSG00000099364 | FBXL19  |
| 766 | 6  | ENSG00000112234 | FBXL4   |
| 767 | 2  | ENSG00000138081 | FBXO11  |
| 768 | 18 | ENSG00000141665 | FBXO15  |
| 769 | 8  | ENSG00000214050 | FBXO16  |

|     |    |                 |         |
|-----|----|-----------------|---------|
| 770 | 12 | ENSG00000135108 | FBXO21  |
| 771 | 15 | ENSG00000167196 | FBXO22  |
| 772 | 16 | ENSG00000103264 | FBXO31  |
| 773 | X  | ENSG00000102302 | FGD1    |
| 774 | 5  | ENSG00000070193 | FGF10   |
| 775 | 3  | ENSG00000114279 | FGF12   |
| 776 | 13 | ENSG00000102466 | FGF14   |
| 777 | 5  | ENSG00000156427 | FGF18   |
| 778 | 11 | ENSG00000186895 | FGF3    |
| 779 | 4  | ENSG00000138675 | FGF5    |
| 780 | 8  | ENSG00000077782 | FGFR1   |
| 781 | 10 | ENSG00000066468 | FGFR2   |
| 782 | 4  | ENSG00000068078 | FGFR3   |
| 783 | 4  | ENSG00000127418 | FGFRL1  |
| 784 | 1  | ENSG00000091483 | FH      |
| 785 | 4  | ENSG00000137460 | FHDC1   |
| 786 | X  | ENSG00000022267 | FHL1    |
| 787 | 6  | ENSG00000112367 | FIG4    |
| 788 | 7  | ENSG00000132436 | FIGNL1  |
| 789 | 7  | ENSG00000106080 | FKBP14  |
| 790 | 9  | ENSG00000119321 | FKBP15  |
| 791 | 19 | ENSG00000181027 | FKRP    |
| 792 | 9  | ENSG00000106692 | FKTN    |
| 793 | 1  | ENSG00000143631 | FLG     |
| 794 | X  | ENSG00000196924 | FLNA    |
| 795 | 3  | ENSG00000136068 | FLNB    |
| 796 | 5  | ENSG00000037280 | FLT4    |
| 797 | 1  | ENSG00000162769 | FLVCR1  |
| 798 | 14 | ENSG00000119686 | FLVCR2  |
| 799 | 1  | ENSG00000155816 | FMN2    |
| 800 | X  | ENSG00000102081 | FMR1    |
| 801 | 1  | ENSG00000137942 | FNBP1L  |
| 802 | 1  | ENSG00000143107 | FNDC7   |
| 803 | 11 | ENSG00000110195 | FOLR1   |
| 804 | 6  | ENSG00000054598 | FOXC1   |
| 805 | 16 | ENSG00000176692 | FOXC2   |
| 806 | 9  | ENSG00000178919 | FOXE1   |
| 807 | 1  | ENSG00000186790 | FOXE3   |
| 808 | 16 | ENSG00000103241 | FOXF1   |
| 809 | 14 | ENSG00000176165 | FOXG1   |
| 810 | 17 | ENSG00000141568 | FOXK2   |
| 811 | 17 | ENSG00000109101 | FOXN1   |
| 812 | 12 | ENSG00000139445 | FOXN4   |
| 813 | 3  | ENSG00000114861 | FOXP1   |
| 814 | 7  | ENSG00000128573 | FOXP2   |
| 815 | X  | ENSG00000049768 | FOXP3   |
| 816 | 11 | ENSG00000110074 | FOXRED1 |
| 817 | 4  | ENSG00000138759 | FRAS1   |

|     |    |                 |         |
|-----|----|-----------------|---------|
| 818 | 9  | ENSG00000164946 | FREM1   |
| 819 | 13 | ENSG00000150893 | FREM2   |
| 820 | 4  | ENSG00000109536 | FRG1    |
| 821 | X  | ENSG00000165694 | FRMD7   |
| 822 | 11 | ENSG00000126391 | FRMD8   |
| 823 | 9  | ENSG00000070601 | FRMPD1  |
| 824 | 13 | ENSG00000073910 | FRY     |
| 825 | 4  | ENSG00000075539 | FRYL    |
| 826 | 2  | ENSG00000170820 | FSHR    |
| 827 | 21 | ENSG00000160282 | FTCD    |
| 828 | 19 | ENSG00000087086 | FTL     |
| 829 | 16 | ENSG00000140718 | FTO     |
| 830 | X  | ENSG00000068438 | FTSJ1   |
| 831 | 1  | ENSG00000179163 | FUCA1   |
| 832 | 3  | ENSG00000163820 | FYCO1   |
| 833 | 8  | ENSG00000164930 | FZD6    |
| 834 | 4  | ENSG00000138757 | G3BP2   |
| 835 | 17 | ENSG00000171298 | GAA     |
| 836 | 17 | ENSG00000170296 | GABARAP |
| 837 | 9  | ENSG00000136928 | GABBR2  |
| 838 | 5  | ENSG00000022355 | GABRA1  |
| 839 | X  | ENSG00000011677 | GABRA3  |
| 840 | 5  | ENSG00000145864 | GABRB2  |
| 841 | 15 | ENSG00000166206 | GABRB3  |
| 842 | 2  | ENSG00000128683 | GAD1    |
| 843 | 4  | ENSG00000178950 | GAK     |
| 844 | 14 | ENSG00000054983 | GALC    |
| 845 | 1  | ENSG00000117308 | GALE    |
| 846 | 17 | ENSG00000108479 | GALK1   |
| 847 | 12 | ENSG00000130035 | GALNT8  |
| 848 | 9  | ENSG00000213930 | GALT    |
| 849 | 19 | ENSG00000130005 | GAMT    |
| 850 | 16 | ENSG00000261609 | GAN     |
| 851 | 9  | ENSG00000165219 | GAPVD1  |
| 852 | 22 | ENSG00000185340 | GAS2L1  |
| 853 | 17 | ENSG00000270765 | GAS2L2  |
| 854 | X  | ENSG00000102145 | GATA1   |
| 855 | 3  | ENSG00000179348 | GATA2   |
| 856 | 8  | ENSG00000136574 | GATA4   |
| 857 | 18 | ENSG00000141448 | GATA6   |
| 858 | 15 | ENSG00000171766 | GATM    |
| 859 | 9  | ENSG00000070610 | GBA2    |
| 860 | 3  | ENSG00000114480 | GBE1    |
| 861 | 19 | ENSG00000105607 | GCDH    |
| 862 | 14 | ENSG00000131979 | GCH1    |
| 863 | 7  | ENSG00000106633 | GCK     |
| 864 | 2  | ENSG00000084734 | GCKR    |
| 865 | 6  | ENSG00000137270 | GCM1    |



|     |    |                 |        |
|-----|----|-----------------|--------|
| 866 | 16 | ENSG00000140905 | GCSH   |
| 867 | 20 | ENSG00000125965 | GDF5   |
| 868 | 8  | ENSG00000156466 | GDF6   |
| 869 | X  | ENSG00000203879 | GDI1   |
| 870 | 17 | ENSG00000131095 | GFAP   |
| 871 | 3  | ENSG00000168827 | GFM1   |
| 872 | 6  | ENSG00000145990 | GFOD1  |
| 873 | 16 | ENSG00000141098 | GFOD2  |
| 874 | 16 | ENSG00000103365 | GGA2   |
| 875 | 17 | ENSG00000278311 | GGNBP2 |
| 876 | 5  | ENSG00000112964 | GHR    |
| 877 | 16 | ENSG00000131153 | GIN52  |
| 878 | 1  | ENSG00000137960 | GIPC2  |
| 879 | 6  | ENSG00000152661 | GJA1   |
| 880 | 6  | ENSG00000135355 | GJA10  |
| 881 | 13 | ENSG00000121743 | GJA3   |
| 882 | 1  | ENSG00000121634 | GJA8   |
| 883 | 13 | ENSG00000165474 | GJB2   |
| 884 | 13 | ENSG00000121742 | GJB6   |
| 885 | 1  | ENSG00000198835 | GJC2   |
| 886 | X  | ENSG00000198814 | GK     |
| 887 | 3  | ENSG00000170266 | GLB1   |
| 888 | 9  | ENSG00000178445 | GLDC   |
| 889 | 9  | ENSG00000119392 | GLE1   |
| 890 | 2  | ENSG00000074047 | GLI2   |
| 891 | 7  | ENSG00000106571 | GLI3   |
| 892 | 1  | ENSG00000174332 | GLIS1  |
| 893 | 9  | ENSG00000107249 | GLIS3  |
| 894 | 1  | ENSG00000174842 | GLMN   |
| 895 | 6  | ENSG00000112164 | GLP1R  |
| 896 | 17 | ENSG00000065325 | GLP2R  |
| 897 | 5  | ENSG00000145888 | GLRA1  |
| 898 | X  | ENSG00000101958 | GLRA2  |
| 899 | 10 | ENSG00000148672 | GLUD1  |
| 900 | 1  | ENSG00000135821 | GLUL   |
| 901 | 3  | ENSG00000168237 | GLYCK  |
| 902 | 5  | ENSG00000196743 | GM2A   |
| 903 | 2  | ENSG00000144591 | GMPPA  |
| 904 | 3  | ENSG00000173540 | GMPPB  |
| 905 | 7  | ENSG00000127955 | GNAI1  |
| 906 | 1  | ENSG00000065135 | GNAI3  |
| 907 | 16 | ENSG00000087258 | GNAO1  |
| 908 | 9  | ENSG00000156052 | GNAQ   |
| 909 | 20 | ENSG00000087460 | GNAS   |
| 910 | 22 | ENSG00000128266 | GNAZ   |
| 911 | 9  | ENSG00000159921 | GNE    |
| 912 | 1  | ENSG00000116906 | GNPAT  |
| 913 | 12 | ENSG00000111670 | GNPTAB |

|     |    |                 |         |
|-----|----|-----------------|---------|
| 914 | 16 | ENSG00000090581 | GNPTG   |
| 915 | 4  | ENSG00000109163 | GNRHR   |
| 916 | 12 | ENSG00000135677 | GNS     |
| 917 | 14 | ENSG00000066455 | GOLGA5  |
| 918 | 3  | ENSG00000173230 | GOLGB1  |
| 919 | 1  | ENSG00000120370 | GORAB   |
| 920 | 17 | ENSG00000108433 | GOSR2   |
| 921 | 22 | ENSG00000203618 | GP1BB   |
| 922 | 10 | ENSG00000119927 | GPAM    |
| 923 | 1  | ENSG00000092978 | GPATCH2 |
| 924 | 2  | ENSG00000063660 | GPC1    |
| 925 | X  | ENSG00000147257 | GPC3    |
| 926 | 14 | ENSG00000171723 | GPHN    |
| 927 | 19 | ENSG00000105220 | GPI     |
| 928 | 19 | ENSG00000125734 | GPR108  |
| 929 | 4  | ENSG00000152990 | GPR125  |
| 930 | 3  | ENSG00000154165 | GPR15   |
| 931 | 17 | ENSG00000277399 | GPR179  |
| 932 | 16 | ENSG00000205336 | GPR56   |
| 933 | 5  | ENSG00000164199 | GPR98   |
| 934 | 1  | ENSG00000121957 | GPSM2   |
| 935 | 19 | ENSG00000089351 | GRAMD1A |
| 936 | 1  | ENSG00000158055 | GRHL3   |
| 937 | X  | ENSG00000125675 | GRIA3   |
| 938 | 10 | ENSG00000182771 | GRID1   |
| 939 | 6  | ENSG00000164418 | GRIK2   |
| 940 | 16 | ENSG00000183454 | GRIN2A  |
| 941 | 12 | ENSG00000273079 | GRIN2B  |
| 942 | 12 | ENSG00000155974 | GRIP1   |
| 943 | 6  | ENSG00000152822 | GRM1    |
| 944 | 5  | ENSG00000113262 | GRM6    |
| 945 | 17 | ENSG00000030582 | GRN     |
| 946 | 4  | ENSG00000215203 | GRXCR1  |
| 947 | X  | ENSG00000189369 | GSPT2   |
| 948 | 20 | ENSG00000100983 | GSS     |
| 949 | 6  | ENSG00000213780 | GTF2H4  |
| 950 | 6  | ENSG00000272047 | GTF2H5  |
| 951 | 12 | ENSG00000070019 | GUCY2C  |
| 952 | 17 | ENSG00000132518 | GUCY2D  |
| 953 | 7  | ENSG00000169919 | GUSB    |
| 954 | 14 | ENSG00000100450 | GZMH    |
| 955 | 11 | ENSG00000130600 | H19     |
| 956 | 5  | ENSG00000113648 | H2AFY   |
| 957 | 1  | ENSG00000163041 | H3F3A   |
| 958 | 1  | ENSG00000049239 | H6PD    |
| 959 | 4  | ENSG00000138796 | HADH    |
| 960 | 12 | ENSG00000084110 | HAL     |
| 961 | 19 | ENSG00000187664 | HAPLN4  |

|      |    |                 |           |
|------|----|-----------------|-----------|
| 962  | 1  | ENSG00000143575 | HAX1      |
| 963  | X  | ENSG00000004961 | HCCS      |
| 964  | X  | ENSG00000172534 | HCFC1     |
| 965  | 5  | ENSG00000164588 | HCN1      |
| 966  | 2  | ENSG00000068024 | HDAC4     |
| 967  | X  | ENSG00000094631 | HDAC6     |
| 968  | X  | ENSG00000147099 | HDAC8     |
| 969  | 1  | ENSG00000119285 | HEATR1    |
| 970  | 14 | ENSG00000092148 | HECTD1    |
| 971  | 2  | ENSG00000138411 | HECW2     |
| 972  | 3  | ENSG00000173706 | HEG1      |
| 973  | 10 | ENSG00000119969 | HELLS     |
| 974  | 11 | ENSG00000165478 | HEPACAM   |
| 975  | X  | ENSG00000089472 | HEPH      |
| 976  | 15 | ENSG00000128731 | HERC2     |
| 977  | 3  | ENSG00000163666 | HESX1     |
| 978  | 15 | ENSG00000213614 | HEXA      |
| 979  | 5  | ENSG00000049860 | HEXB      |
| 980  | 17 | ENSG00000169660 | HEXDC     |
| 981  | 7  | ENSG00000019991 | HGF       |
| 982  | 8  | ENSG00000165102 | HGSNAT    |
| 983  | 2  | ENSG00000198130 | HIBCH     |
| 984  | 17 | ENSG00000131097 | HIGD1B    |
| 985  | 5  | ENSG00000169567 | HINT1     |
| 986  | 12 | ENSG00000130787 | HIP1R     |
| 987  | 6  | ENSG00000276903 | HIST1H2AL |
| 988  | 6  | ENSG00000158373 | HIST1H2BD |
| 989  | 6  | ENSG00000275714 | HIST1H3A  |
| 990  | 6  | ENSG00000197061 | HIST1H4C  |
| 991  | 6  | ENSG00000010818 | HIVP2     |
| 992  | 21 | ENSG00000159267 | HLCS      |
| 993  | 19 | ENSG00000064961 | HMG20B    |
| 994  | 12 | ENSG00000149948 | HMGA2     |
| 995  | X  | ENSG00000029993 | HMGB3     |
| 996  | 1  | ENSG00000117305 | HMGCL     |
| 997  | 1  | ENSG00000134240 | HMGCS2    |
| 998  | 17 | ENSG00000275410 | HNF1B     |
| 999  | 1  | ENSG00000153187 | HNRNPU    |
| 1000 | 5  | ENSG00000152413 | HOMER1    |
| 1001 | 8  | ENSG00000168172 | HOOK3     |
| 1002 | 7  | ENSG00000105991 | HOXA1     |
| 1003 | 12 | ENSG00000180818 | HOXC10    |
| 1004 | 12 | ENSG00000123364 | HOXC13    |
| 1005 | 2  | ENSG00000128714 | HOXD13    |
| 1006 | 12 | ENSG00000158104 | HPD       |
| 1007 | X  | ENSG00000165704 | HPRT1     |
| 1008 | 10 | ENSG00000107521 | HPS1      |
| 1009 | 10 | ENSG00000172987 | HPSE2     |

|      |    |                 |          |
|------|----|-----------------|----------|
| 1010 | 8  | ENSG00000168453 | HR       |
| 1011 | 11 | ENSG00000174775 | HRAS     |
| 1012 | 18 | ENSG00000134489 | HRH4     |
| 1013 | 1  | ENSG00000153936 | HS2ST1   |
| 1014 | X  | ENSG00000072506 | HSD17B10 |
| 1015 | 5  | ENSG00000133835 | HSD17B4  |
| 1016 | 21 | ENSG00000160207 | HSF2BP   |
| 1017 | 16 | ENSG00000102878 | HSF4     |
| 1018 | 5  | ENSG00000113013 | HSPA9    |
| 1019 | 5  | ENSG00000169271 | HSPB3    |
| 1020 | 2  | ENSG00000144381 | HSPD1    |
| 1021 | 1  | ENSG00000142798 | HSPG2    |
| 1022 | X  | ENSG00000086758 | HUWE1    |
| 1023 | 3  | ENSG00000114378 | HYAL1    |
| 1024 | 16 | ENSG00000157423 | HYDIN    |
| 1025 | 11 | ENSG00000198331 | HYLS1    |
|      | X  | ENSG00000010404 |          |
| 1026 | X  | ENSG00000241489 | IDS      |
| 1027 | 4  | ENSG00000127415 | IDUA     |
|      | 18 | ENSG00000134049 |          |
| 1028 | 18 | ENSG00000267228 | IER3IP1  |
| 1029 | 2  | ENSG00000115267 | IFIH1    |
| 1030 | 11 | ENSG00000206013 | IFITM5   |
| 1031 | 12 | ENSG00000111537 | IFNG     |
| 1032 | 3  | ENSG00000163913 | IFT122   |
| 1033 | 16 | ENSG00000187535 | IFT140   |
| 1034 | 2  | ENSG00000138002 | IFT172   |
| 1035 | 22 | ENSG00000100360 | IFT27    |
| 1036 | 14 | ENSG00000119650 | IFT43    |
| 1037 | 3  | ENSG00000068885 | IFT80    |
| 1038 | X  | ENSG00000089289 | IGBP1    |
| 1039 | 15 | ENSG00000103742 | IGDCC4   |
| 1040 | 12 | ENSG00000017427 | IGF1     |
| 1041 | 11 | ENSG00000167244 | IGF2     |
| 1042 | 6  | ENSG00000197081 | IGF2R    |
| 1043 | 11 | ENSG00000132740 | IGHMBP2  |
| 1044 | 22 | ENSG00000211658 | IGLV3-27 |
| 1045 | X  | ENSG00000147255 | IGSF1    |
| 1046 | 2  | ENSG00000163501 | IHH      |
| 1047 | X  | ENSG00000269335 | IKBKG    |
|      | 1  | ENSG00000081985 |          |
| 1048 | 1  | ENSG00000281152 | IL12RB2  |
| 1049 | 3  | ENSG00000163702 | IL17RC   |
| 1050 | 2  | ENSG00000115604 | IL18R1   |
| 1051 | X  | ENSG00000169306 | IL1RAPL1 |
| 1052 | 3  | ENSG00000091181 | IL5RA    |
| 1053 | 3  | ENSG00000145103 | ILDR1    |
| 1054 | 11 | ENSG00000166333 | ILK      |

|      |    |                 |         |
|------|----|-----------------|---------|
| 1055 | 19 | ENSG00000105135 | ILVBL   |
| 1056 | 8  | ENSG00000104331 | IMPAD1  |
| 1057 | 3  | ENSG00000178035 | IMPDH2  |
| 1058 | 15 | ENSG00000128908 | INO80   |
| 1059 | 4  | ENSG00000109452 | INPP4B  |
| 1060 | 9  | ENSG00000148384 | INPP5E  |
| 1061 | 22 | ENSG00000185133 | INPP5J  |
| 1062 | 11 | ENSG00000165458 | INPPL1  |
| 1063 | 11 | ENSG00000254647 | INS     |
| 1064 | 19 | ENSG00000171105 | INSR    |
| 1065 | 1  | ENSG00000027644 | INSRR   |
| 1066 | 8  | ENSG00000104613 | INTS10  |
| 1067 | 1  | ENSG00000198700 | IPO9    |
| 1068 | 1  | ENSG00000197429 | IPP     |
| 1069 | 7  | ENSG00000106012 | IQCE    |
| 1070 | 3  | ENSG00000144711 | IQSEC1  |
| 1071 | X  | ENSG00000124313 | IQSEC2  |
| 1072 | 1  | ENSG00000117595 | IRF6    |
| 1073 | 19 | ENSG00000124449 | IRGC    |
| 1074 | 2  | ENSG00000169047 | IRS1    |
| 1075 | 7  | ENSG00000214960 | ISPD    |
| 1076 | 17 | ENSG00000005884 | ITGA3   |
| 1077 | 2  | ENSG00000091409 | ITGA6   |
| 1078 | 12 | ENSG00000135424 | ITGA7   |
| 1079 | 3  | ENSG00000144668 | ITGA9   |
| 1080 | 17 | ENSG00000259207 | ITGB3   |
| 1081 | 2  | ENSG00000115221 | ITGB6   |
| 1082 | 3  | ENSG00000150995 | ITPR1   |
| 1083 | 15 | ENSG00000128928 | IVD     |
| 1084 | 6  | ENSG00000009765 | IYD     |
| 1085 | 9  | ENSG00000205442 | IZUMO3  |
| 1086 | 20 | ENSG00000101384 | JAG1    |
| 1087 | 19 | ENSG00000105639 | JAK3    |
| 1088 | 11 | ENSG00000166086 | JAM3    |
| 1089 | 22 | ENSG00000100221 | JOSD1   |
| 1090 | 16 | ENSG00000154118 | JPH3    |
| 1091 | 9  | ENSG00000107104 | KANK1   |
| 1092 | 17 | ENSG00000120071 | KANSL1  |
| 1093 | 8  | ENSG00000083168 | KAT6A   |
| 1094 | 10 | ENSG00000156650 | KAT6B   |
| 1095 | 16 | ENSG00000140854 | KATNB1  |
| 1096 | 3  | ENSG00000187715 | KBTBD12 |
| 1097 | 15 | ENSG00000234438 | KBTBD13 |
| 1098 | 12 | ENSG00000111262 | KCNA1   |
| 1099 | 1  | ENSG00000177301 | KCNA2   |
| 1100 | 20 | ENSG00000158445 | KCNB1   |
| 1101 | 19 | ENSG00000131398 | KCNC3   |
| 1102 | 1  | ENSG00000116396 | KCNC4   |

|      |    |                 |           |
|------|----|-----------------|-----------|
| 1103 | 1  | ENSG00000171385 | KCND3     |
| 1104 | 21 | ENSG00000159197 | KCNE2     |
| 1105 | 2  | ENSG00000171126 | KCNG3     |
| 1106 | 1  | ENSG00000143473 | KCNH1     |
| 1107 | 17 | ENSG00000089558 | KCNH4     |
| 1108 | 11 | ENSG00000151704 | KCNJ1     |
| 1109 | 1  | ENSG00000177807 | KCNJ10    |
| 1110 | 11 | ENSG00000187486 | KCNJ11    |
| 1111 | 22 | ENSG00000168135 | KCNJ4     |
| 1112 | 21 | ENSG00000157542 | KCNJ6     |
| 1113 | 2  | ENSG00000171303 | KCNK3     |
| 1114 | 10 | ENSG00000156113 | KCNMA1    |
| 1115 | 20 | ENSG00000075043 | KCNQ2     |
| 1116 | 8  | ENSG00000184156 | KCNQ3     |
| 1117 | 9  | ENSG00000107147 | KCNT1     |
| 1118 | 18 | ENSG00000134504 | KCTD1     |
| 1119 | 7  | ENSG00000243335 | KCTD7     |
| 1120 | 19 | ENSG00000105438 | KDELR1    |
| 1121 | 22 | ENSG00000100196 | KDELR3    |
| 1122 | 5  | ENSG00000120733 | KDM3B     |
| 1123 | 19 | ENSG00000127663 | KDM4B     |
| 1124 | X  | ENSG00000126012 | KDM5C     |
| 1125 | X  | ENSG00000147050 | KDM6A     |
| 1126 | 2  | ENSG00000138030 | KHK       |
| 1127 | 7  | ENSG00000122548 | KIAA0087  |
| 1128 | 3  | ENSG00000145016 | KIAA0226  |
| 1129 | 9  | ENSG00000136813 | KIAA0368  |
| 1130 | 4  | ENSG00000121210 | KIAA0922  |
| 1131 | 12 | ENSG00000136051 | KIAA1033  |
| 1132 | 4  | ENSG00000138688 | KIAA1109  |
| 1133 | 4  | ENSG00000109265 | KIAA1211  |
| 1134 | 6  | ENSG00000112379 | KIAA1244  |
| 1135 | 10 | ENSG00000198954 | KIAA1279  |
| 1136 | 7  | ENSG00000122778 | KIAA1549  |
| 1137 | X  | ENSG00000050030 | KIAA2022  |
| 1138 | 9  | ENSG00000183354 | KIAA2026  |
| 1139 | 2  | ENSG00000134313 | KIDINS220 |
| 1140 | 10 | ENSG00000138160 | KIF11     |
| 1141 | 6  | ENSG00000137177 | KIF13A    |
| 1142 | 17 | ENSG00000186185 | KIF18B    |
| 1143 | 2  | ENSG00000130294 | KIF1A     |
| 1144 | 16 | ENSG00000079616 | KIF22     |
| 1145 | 15 | ENSG00000137807 | KIF23     |
| 1146 | X  | ENSG00000090889 | KIF4A     |
| 1147 | 10 | ENSG00000170759 | KIF5B     |
| 1148 | 2  | ENSG00000168280 | KIF5C     |
| 1149 | 15 | ENSG00000166813 | KIF7      |
| 1150 | 1  | ENSG00000183853 | KIRREL    |

|      |    |                 |           |
|------|----|-----------------|-----------|
| 1151 | 11 | ENSG00000149571 | KIRREL3   |
| 1152 | 4  | ENSG00000157404 | KIT       |
| 1153 | 12 | ENSG00000049130 | KITLG     |
| 1154 | 4  | ENSG00000134962 | KLB       |
| 1155 | 19 | ENSG00000105610 | KLF1      |
| 1156 | 13 | ENSG00000118922 | KLF12     |
| 1157 | 16 | ENSG00000104731 | KLHDC4    |
| 1158 | 17 | ENSG00000161594 | KLHL10    |
| 1159 | X  | ENSG00000174010 | KLHL15    |
| 1160 | 3  | ENSG00000114648 | KLHL18    |
| 1161 | 6  | ENSG00000186231 | KLHL32    |
| 1162 | 16 | ENSG00000135686 | KLHL36    |
| 1163 | 3  | ENSG00000157119 | KLHL40    |
| 1164 | 19 | ENSG00000142515 | CLK3      |
| 1165 | 12 | ENSG00000134539 | KLRD1     |
| 1166 | 11 | ENSG00000118058 | KMT2A     |
| 1167 | 19 | ENSG00000272333 | KMT2B     |
| 1168 | 12 | ENSG00000167548 | KMT2D     |
| 1169 | 19 | ENSG00000118162 | KPTN      |
| 1170 | 12 | ENSG00000133703 | KRAS      |
| 1171 | 7  | ENSG00000133619 | KRBA1     |
| 1172 | 17 | ENSG00000171346 | KRT15     |
| 1173 | 12 | ENSG00000189182 | KRT77     |
| 1174 | 12 | ENSG00000170421 | KRT8      |
| 1175 | 12 | ENSG00000135443 | KRT85     |
| 1176 | 21 | ENSG00000186965 | KRTAP19-2 |
| 1177 | 2  | ENSG00000115919 | KYNU      |
| 1178 | X  | ENSG00000198910 | L1CAM     |
| 1179 | 14 | ENSG00000087299 | L2HGDH    |
| 1180 | 18 | ENSG00000101680 | LAMA1     |
| 1181 | 6  | ENSG00000196569 | LAMA2     |
| 1182 | 6  | ENSG00000112769 | LAMA4     |
| 1183 | 1  | ENSG00000135862 | LAMC1     |
| 1184 | 9  | ENSG00000050555 | LAMC3     |
| 1185 | X  | ENSG00000005893 | LAMP2     |
| 1186 | 22 | ENSG00000133424 | LARGE     |
| 1187 | 15 | ENSG00000166173 | LARP6     |
| 1188 | 4  | ENSG00000174720 | LARP7     |
| 1189 | 5  | ENSG00000133706 | LARS      |
| 1190 | 1  | ENSG00000143815 | LBR       |
| 1191 | 15 | ENSG00000168806 | LCMT2     |
| 1192 | 2  | ENSG00000115850 | LCT       |
| 1193 | 11 | ENSG00000134333 | LDHA      |
| 1194 | 4  | ENSG00000138795 | LEF1      |
| 1195 | 6  | ENSG00000161904 | LEMD2     |
| 1196 | 12 | ENSG00000174106 | LEMD3     |
| 1197 | 19 | ENSG00000275183 | LENG9     |
| 1198 | 4  | ENSG00000168924 | LETM1     |

|      |    |                 |            |
|------|----|-----------------|------------|
| 1199 | 7  | ENSG00000106003 | LFNG       |
| 1200 | 9  | ENSG00000107187 | LHX3       |
| 1201 | 1  | ENSG00000121454 | LHX4       |
| 1202 | 4  | ENSG00000121897 | LIAS       |
| 1203 | 17 | ENSG00000005156 | LIG3       |
| 1204 | 13 | ENSG00000174405 | LIG4       |
| 1205 | 4  | ENSG00000064042 | LIMCH1     |
| 1206 | 15 | ENSG00000169783 | LINGO1     |
| 1207 | 6  | ENSG00000168216 | LMBRD1     |
| 1208 | 1  | ENSG00000160789 | LMNA       |
| 1209 | 5  | ENSG00000113368 | LMNB1      |
| 1210 | 9  | ENSG00000136944 | LMX1B      |
| 1211 | 19 | ENSG00000196365 | LONP1      |
| 1212 | 10 | ENSG00000138131 | LOXL4      |
| 1213 | 9  | ENSG00000198121 | LPAR1      |
| 1214 | 2  | ENSG00000134324 | LPIN1      |
| 1215 | 3  | ENSG00000145012 | LPP        |
| 1216 | 4  | ENSG00000198589 | LRBA       |
| 1217 | 3  | ENSG00000186001 | LRCH3      |
| 1218 | 12 | ENSG00000139263 | LRIG3      |
| 1219 | 12 | ENSG00000123384 | LRP1       |
| 1220 | 2  | ENSG00000081479 | LRP2       |
| 1221 | 11 | ENSG00000134569 | LRP4       |
| 1222 | 11 | ENSG00000162337 | LRP5       |
| 1223 | 2  | ENSG00000138095 | LRPPRC     |
| 1224 | 6  | ENSG00000079691 | LRRC16A    |
| 1225 | 3  | ENSG00000114248 | LRRC31     |
| 1226 | 7  | ENSG00000128594 | LRRC4      |
| 1227 | 8  | ENSG00000129295 | LRRC6      |
| 1228 | 3  | ENSG00000093167 | LRRFIP2    |
| 1229 | 12 | ENSG00000133640 | LRRIQ1     |
| 1230 | 15 | ENSG00000154237 | LRRK1      |
| 1231 | 11 | ENSG00000184154 | LRTOMT     |
| 1232 | 6  | ENSG00000226979 | LTA        |
| 1233 | 14 | ENSG00000119681 | LTBP2      |
| 1234 | 17 | ENSG00000108848 | LUC7L3     |
| 1235 | 2  | ENSG00000248672 | LY75-CD302 |
| 1236 | 1  | ENSG00000122224 | LY9        |
| 1237 | 8  | ENSG00000197353 | LYPD2      |
| 1238 | 1  | ENSG00000143669 | LYST       |
| 1239 | 3  | ENSG00000163818 | LZTFL1     |
| 1240 | 22 | ENSG00000099949 | LZTR1      |
| 1241 | 11 | ENSG00000110514 | MADD       |
| 1242 | 4  | ENSG00000090316 | MAEA       |
| 1243 | 16 | ENSG00000178573 | MAF        |
| 1244 | 20 | ENSG00000204103 | MAFB       |
| 1245 | 15 | ENSG00000254585 | MAGEL2     |
| 1246 | 9  | ENSG00000177239 | MAN1B1     |



|      |    |                 |            |
|------|----|-----------------|------------|
| 1247 | 19 | ENSG00000104774 | MAN2B1     |
| 1248 | 4  | ENSG00000109323 | MANBA      |
| 1249 | X  | ENSG00000189221 | MAOA       |
| 1250 | 15 | ENSG00000169032 | MAP2K1     |
| 1251 | 19 | ENSG00000126934 | MAP2K2     |
| 1252 | 5  | ENSG00000095015 | MAP3K1     |
| 1253 | 6  | ENSG00000135341 | MAP3K7     |
| 1254 | 14 | ENSG00000006432 | MAP3K9     |
| 1255 | 22 | ENSG00000185386 | MAPK11     |
| 1256 | 15 | ENSG00000137802 | MAPKBP1    |
| 1257 | 17 | ENSG00000186868 | MAPT       |
| 1258 | 1  | ENSG00000116141 | MARK1      |
| 1259 | 2  | ENSG00000247626 | MARS2      |
| 1260 | 3  | ENSG00000127241 | MASP1      |
| 1261 | 1  | ENSG00000086015 | MAST2      |
| 1262 | 10 | ENSG00000151224 | MAT1A      |
| 1263 | 1  | ENSG00000162510 | MATN1      |
| 1264 | 2  | ENSG00000132031 | MATN3      |
| 1265 | 3  | ENSG00000180611 | MB21D2     |
| 1266 | 2  | ENSG00000204406 | MBD5       |
| 1267 | X  | ENSG00000012174 | MBTPS2     |
| 1268 | 18 | ENSG00000185231 | MC2R       |
| 1269 | 3  | ENSG00000078070 | MCCC1      |
| 1270 | 5  | ENSG00000131844 | MCCC2      |
| 1271 | 2  | ENSG00000124370 | MCEE       |
| 1272 | 13 | ENSG00000126217 | MCF2L      |
| 1273 | 1  | ENSG00000143384 | MCL1       |
| 1274 | 21 | ENSG00000215424 | MCM3AP-AS1 |
| 1275 | 19 | ENSG00000090674 | MCOLN1     |
| 1276 | 8  | ENSG00000147316 | MCPH1      |
| 1277 | X  | ENSG00000169057 | MECP2      |
| 1278 | X  | ENSG00000184634 | MED12      |
| 1279 | 17 | ENSG00000108510 | MED13      |
| 1280 | 12 | ENSG00000123066 | MED13L     |
| 1281 | 22 | ENSG00000099917 | MED15      |
| 1282 | 4  | ENSG00000118579 | MED28      |
| 1283 | 5  | ENSG00000081189 | MEF2C      |
| 1284 | 1  | ENSG00000116604 | MEF2D      |
| 1285 | 5  | ENSG00000145794 | MEGF10     |
| 1286 | 19 | ENSG00000105429 | MEGF8      |
| 1287 | 15 | ENSG00000134138 | MEIS2      |
| 1288 | 15 | ENSG00000188095 | MESP2      |
| 1289 | 7  | ENSG00000105976 | MET        |
| 1290 | 17 | ENSG00000181038 | METTL23    |
|      | 11 | ENSG00000235718 |            |
| 1291 | 11 | ENSG00000259159 | MFRP       |
| 1292 | 4  | ENSG00000164073 | MFSD8      |
| 1293 | 7  | ENSG00000257335 | MGAM       |

|      |    |                 |           |
|------|----|-----------------|-----------|
| 1294 | 14 | ENSG00000168282 | MGAT2     |
| 1295 | 2  | ENSG00000152127 | MGAT5     |
| 1296 | 20 | ENSG00000125871 | MGME1     |
| 1297 | 12 | ENSG00000111341 | MGP       |
| 1298 | 14 | ENSG00000150526 | MIA2      |
| 1299 | X  | ENSG00000101871 | MID1      |
| 1300 | X  | ENSG00000080561 | MID2      |
| 1301 | 13 | ENSG00000215417 | MIR17HG   |
| 1302 | 10 | ENSG00000266676 | MIR4297   |
| 1303 | 3  | ENSG00000187098 | MITF      |
| 1304 | 20 | ENSG00000125863 | MKKS      |
| 1305 | 15 | ENSG00000179455 | MKRN3     |
| 1306 | 15 | ENSG00000260978 | MKRN3-AS1 |
| 1307 | 17 | ENSG00000011143 | MKS1      |
| 1308 | 22 | ENSG00000100427 | MLC1      |
| 1309 | 3  | ENSG00000076242 | MLH1      |
| 1310 | 6  | ENSG00000130396 | MLLT4     |
| 1311 | 7  | ENSG00000009950 | MLXIPL    |
| 1312 | 16 | ENSG00000103150 | MLYCD     |
| 1313 | 4  | ENSG00000151611 | MMAA      |
| 1314 | 12 | ENSG00000139428 | MMAB      |
| 1315 | 1  | ENSG00000132763 | MMACHC    |
| 1316 | 2  | ENSG00000168288 | MMADHC    |
| 1317 | 11 | ENSG00000137745 | MMP13     |
| 1318 | 12 | ENSG00000123342 | MMP19     |
| 1319 | 20 | ENSG00000100985 | MMP9      |
| 1320 | 22 | ENSG00000169184 | MN1       |
| 1321 | 7  | ENSG00000130675 | MNX1      |
| 1322 | 6  | ENSG00000124615 | MOCS1     |
| 1323 | 5  | ENSG00000164172 | MOCS2     |
| 1324 | 17 | ENSG00000129255 | MPDU1     |
| 1325 | 9  | ENSG00000107186 | MPDZ      |
| 1326 | 15 | ENSG00000178802 | MPI       |
| 1327 | 7  | ENSG00000168303 | MPLKIP    |
| 1328 | 7  | ENSG00000105926 | MPP6      |
| 1329 | 2  | ENSG00000115204 | MPV17     |
| 1330 | 1  | ENSG00000153029 | MR1       |
| 1331 | 22 | ENSG00000185608 | MRPL40    |
| 1332 | 2  | ENSG00000135900 | MRPL44    |
| 1333 | 5  | ENSG00000113048 | MRPS27    |
| 1334 | 11 | ENSG00000156738 | MS4A1     |
| 1335 | 2  | ENSG00000116062 | MSH6      |
| 1336 | 3  | ENSG00000174579 | MSL2      |
| 1337 | X  | ENSG00000005302 | MSL3      |
| 1338 | 16 | ENSG00000162006 | MSLNL     |
| 1339 | 4  | ENSG00000163132 | MSX1      |
| 1340 | 5  | ENSG00000120149 | MSX2      |
| 1341 | MT | ENSG00000198899 | MT-ATP6   |

|      |    |                 |        |
|------|----|-----------------|--------|
| 1342 | 14 | ENSG00000182979 | MTA1   |
| 1343 | 9  | ENSG00000099810 | MTAP   |
| 1344 | 15 | ENSG00000103707 | MTFMT  |
| 1345 | 1  | ENSG00000177000 | MTHFR  |
| 1346 | X  | ENSG00000171100 | MTM1   |
| 1347 | 11 | ENSG00000087053 | MTMR2  |
| 1348 | 22 | ENSG00000100330 | MTMR3  |
| 1349 | 17 | ENSG00000108389 | MTMR4  |
| 1350 | 6  | ENSG00000135297 | MTO1   |
| 1351 | 1  | ENSG00000198793 | MTOR   |
| 1352 | 1  | ENSG00000116984 | MTR    |
| 1353 | 5  | ENSG00000124275 | MTRR   |
| 1354 | 4  | ENSG00000138823 | MTTP   |
| 1355 | 7  | ENSG00000205277 | MUC12  |
| 1356 | 19 | ENSG00000181143 | MUC16  |
| 1357 | 3  | ENSG00000145113 | MUC4   |
| 1358 | 11 | ENSG00000215182 | MUC5AC |
| 1359 | 11 | ENSG00000117983 | MUC5B  |
| 1360 | 6  | ENSG00000146085 | MUT    |
| 1361 | 12 | ENSG00000110921 | MVK    |
| 1362 | 13 | ENSG00000005810 | MYCBP2 |
| 1363 | 2  | ENSG00000134323 | MYCN   |
| 1364 | 17 | ENSG00000006788 | MYH13  |
| 1365 | 17 | ENSG00000109063 | MYH3   |
| 1366 | 22 | ENSG00000100345 | MYH9   |
| 1367 | 17 | ENSG00000091536 | MYO15A |
| 1368 | 17 | ENSG00000266714 | MYO15B |
| 1369 | 12 | ENSG00000166866 | MYO1A  |
| 1370 | 15 | ENSG00000157483 | MYO1E  |
| 1371 | 19 | ENSG00000142347 | MYO1F  |
| 1372 | 7  | ENSG00000136286 | MYO1G  |
| 1373 | 10 | ENSG00000095777 | MYO3A  |
| 1374 | 15 | ENSG00000197535 | MYO5A  |
| 1375 | 18 | ENSG00000167306 | MYO5B  |
| 1376 | 10 | ENSG00000138119 | MYOF   |
| 1377 | 1  | ENSG00000142661 | MYOM3  |
| 1378 | 1  | ENSG00000162601 | MYSM1  |
| 1379 | 2  | ENSG00000186487 | MYT1L  |
| 1380 | 16 | ENSG00000102921 | N4BP1  |
| 1381 | X  | ENSG00000102030 | NAA10  |
| 1382 | 4  | ENSG00000164134 | NAA15  |
| 1383 | 22 | ENSG00000198951 | NAGA   |
| 1384 | 17 | ENSG00000108784 | NAGLU  |
| 1385 | 17 | ENSG00000161653 | NAGS   |
| 1386 | 13 | ENSG00000102452 | NALCN  |
| 1387 | 7  | ENSG00000105835 | NAMPT  |
| 1388 | 11 | ENSG00000137513 | NARS2  |
| 1389 | 3  | ENSG00000160796 | NBEAL2 |

|      |    |                 |         |
|------|----|-----------------|---------|
| 1390 | 8  | ENSG00000104320 | NBN     |
| 1391 | 11 | ENSG00000151503 | NCAPD3  |
| 1392 | 4  | ENSG00000109805 | NCAPG   |
| 1393 | 12 | ENSG00000123338 | NCKAP1L |
| 1394 | 12 | ENSG00000167566 | NCKAP5L |
| 1395 | 2  | ENSG00000115053 | NCL     |
| 1396 | 17 | ENSG00000141027 | NCOR1   |
| 1397 | 16 | ENSG00000072864 | NDE1    |
| 1398 | 15 | ENSG00000182636 | NDN     |
| 1399 | X  | ENSG00000124479 | NDP     |
| 1400 | 5  | ENSG00000070614 | NDST1   |
| 1401 | X  | ENSG00000125356 | NDUFA1  |
| 1402 | 2  | ENSG00000130414 | NDUFA10 |
| 1403 | 19 | ENSG00000174886 | NDUFA11 |
| 1404 | 12 | ENSG00000184752 | NDUFA12 |
| 1405 | 5  | ENSG00000131495 | NDUFA2  |
| 1406 | 12 | ENSG00000139180 | NDUFA9  |
| 1407 | 15 | ENSG00000137806 | NDUFAF1 |
| 1408 | 5  | ENSG00000164182 | NDUFAF2 |
| 1409 | 3  | ENSG00000178057 | NDUFAF3 |
| 1410 | 6  | ENSG00000123545 | NDUFAF4 |
| 1411 | 20 | ENSG00000101247 | NDUFAF5 |
| 1412 | 8  | ENSG00000156170 | NDUFAF6 |
| 1413 | 2  | ENSG00000119013 | NDUFB3  |
| 1414 | 3  | ENSG00000065518 | NDUFB4  |
| 1415 | 8  | ENSG00000147684 | NDUFB9  |
| 1416 | 2  | ENSG00000023228 | NDUFS1  |
| 1417 | 1  | ENSG00000158864 | NDUFS2  |
| 1418 | 11 | ENSG00000213619 | NDUFS3  |
| 1419 | 5  | ENSG00000164258 | NDUFS4  |
| 1420 | 5  | ENSG00000145494 | NDUFS6  |
| 1421 | 19 | ENSG00000115286 | NDUFS7  |
| 1422 | 11 | ENSG00000110717 | NDUFS8  |
| 1423 | 11 | ENSG00000167792 | NDUFV1  |
| 1424 | 18 | ENSG00000178127 | NDUFV2  |
| 1425 | 2  | ENSG00000183091 | NEB     |
| 1426 | 10 | ENSG00000078114 | NEBL    |
| 1427 | 18 | ENSG00000049759 | NEDD4L  |
| 1428 | 4  | ENSG00000137601 | NEK1    |
| 1429 | 3  | ENSG00000114670 | NEK11   |
| 1430 | 6  | ENSG00000204386 | NEU1    |
| 1431 | 1  | ENSG00000162614 | NEXN    |
| 1432 | 17 | ENSG00000196712 | NF1     |
| 1433 | 16 | ENSG00000102908 | NFAT5   |
| 1434 | 1  | ENSG00000162599 | NFIA    |
| 1435 | 19 | ENSG00000008441 | NFIX    |
| 1436 | 10 | ENSG00000077150 | NFKB2   |
| 1437 | 2  | ENSG00000169599 | NFU1    |

|      |    |                 |          |
|------|----|-----------------|----------|
| 1438 | 1  | ENSG00000134259 | NGF      |
| 1439 | 3  | ENSG00000151092 | NGLY1    |
| 1440 | 5  | ENSG00000145912 | NHP2     |
| 1441 | X  | ENSG00000188158 | NHS      |
| 1442 | 6  | ENSG00000135540 | NHSL1    |
| 1443 | 14 | ENSG00000087303 | NID2     |
| 1444 | 14 | ENSG00000100503 | NIN      |
| 1445 | 5  | ENSG00000164190 | NIPBL    |
| 1446 | 22 | ENSG00000184117 | NIPSNAP1 |
| 1447 | 3  | ENSG00000010322 | NISCH    |
| 1448 | 3  | ENSG00000114857 | NKTR     |
| 1449 | 14 | ENSG00000136352 | NKX2-1   |
| 1450 | 20 | ENSG00000125820 | NKX2-2   |
| 1451 | 5  | ENSG00000183072 | NKX2-5   |
| 1452 | 4  | ENSG00000109705 | NKX3-2   |
| 1453 | 3  | ENSG00000169760 | NLGN1    |
| 1454 | X  | ENSG00000196338 | NLGN3    |
| 1455 | X  | ENSG00000146938 | NLGN4X   |
| 1456 | 11 | ENSG00000182261 | NLRP10   |
| 1457 | 1  | ENSG00000162711 | NLRP3    |
| 1458 | 19 | ENSG00000171487 | NLRP5    |
| 1459 | 1  | ENSG00000173614 | NMNAT1   |
| 1460 | 5  | ENSG00000112992 | NNT      |
| 1461 | 7  | ENSG00000106410 | NOBOX    |
| 1462 | 10 | ENSG00000173145 | NOC3L    |
| 1463 | 10 | ENSG00000156574 | NODAL    |
| 1464 | 17 | ENSG00000183691 | NOG      |
| 1465 | X  | ENSG00000147140 | NONO     |
| 1466 | 15 | ENSG00000182117 | NOP10    |
| 1467 | 12 | ENSG00000111641 | NOP2     |
| 1468 | 14 | ENSG00000196943 | NOP9     |
| 1469 | 12 | ENSG00000089250 | NOS1     |
| 1470 | 1  | ENSG00000134250 | NOTCH2   |
| 1471 | 19 | ENSG00000074181 | NOTCH3   |
| 1472 | 15 | ENSG00000185823 | NPAP1    |
| 1473 | 19 | ENSG00000130751 | NPAS1    |
| 1474 | 14 | ENSG00000151322 | NPAS3    |
| 1475 | 18 | ENSG00000141458 | NPC1     |
| 1476 | 14 | ENSG00000119655 | NPC2     |
| 1477 | 2  | ENSG00000144061 | NPHP1    |
| 1478 | 3  | ENSG00000113971 | NPHP3    |
| 1479 | 1  | ENSG00000131697 | NPHP4    |
| 1480 | 19 | ENSG00000161270 | NPHS1    |
| 1481 | 1  | ENSG00000116218 | NPHS2    |
| 1482 | 17 | ENSG00000182446 | NPLOC4   |
| 1483 | 9  | ENSG00000159899 | NPR2     |
| 1484 | X  | ENSG00000169297 | NROB1    |
| 1485 | 5  | ENSG00000175745 | NR2F1    |

|      |    |                 |        |
|------|----|-----------------|--------|
| 1486 | 2  | ENSG00000153234 | NR4A2  |
| 1487 | 9  | ENSG00000148200 | NR6A1  |
| 1488 | 1  | ENSG00000213281 | NRAS   |
| 1489 | 21 | ENSG00000180530 | NRIP1  |
| 1490 | 10 | ENSG00000099250 | NRP1   |
| 1491 | 2  | ENSG00000179915 | NRXN1  |
| 1492 | 11 | ENSG00000110076 | NRXN2  |
| 1493 | 14 | ENSG00000021645 | NRXN3  |
| 1494 | 5  | ENSG00000165671 | NSD1   |
| 1495 | X  | ENSG00000147383 | NSDHL  |
| 1496 | 5  | ENSG00000037474 | NSUN2  |
| 1497 | 10 | ENSG00000076685 | NT5C2  |
| 1498 | 7  | ENSG00000122643 | NT5C3A |
| 1499 | 1  | ENSG00000198400 | NTRK1  |
| 1500 | 14 | ENSG00000151413 | NUBPL  |
| 1501 | 12 | ENSG00000111581 | NUP107 |
| 1502 | 19 | ENSG00000213024 | NUP62  |
| 1503 | 14 | ENSG00000205978 | NYNRIN |
| 1504 | X  | ENSG00000188937 | NYX    |
| 1505 | 15 | ENSG00000180304 | OAZ2   |
| 1506 | 1  | ENSG00000154358 | OBSCN  |
| 1507 | 2  | ENSG00000124006 | OBSL1  |
| 1508 | 15 | ENSG00000104044 | OCA2   |
| 1509 | 5  | ENSG00000197822 | OCLN   |
| 1510 | X  | ENSG00000122126 | OCRL   |
| 1511 | 2  | ENSG00000115758 | ODC1   |
| 1512 | X  | ENSG00000046651 | OFD1   |
| 1513 | X  | ENSG00000147162 | OGT    |
| 1514 | 10 | ENSG00000197430 | OPALIN |
| 1515 | 11 | ENSG00000183715 | OPCML  |
| 1516 | X  | ENSG00000079482 | OPHN1  |
| 1517 | 11 | ENSG00000254737 | OR10G4 |
| 1518 | 19 | ENSG00000186723 | OR10H1 |
| 1519 | 1  | ENSG00000173285 | OR10K1 |
| 1520 | 11 | ENSG00000180475 | OR10Q1 |
| 1521 | 16 | ENSG00000168158 | OR2C1  |
| 1522 | 1  | ENSG00000198128 | OR2L3  |
| 1523 | 1  | ENSG00000175143 | OR2T1  |
|      | 11 | ENSG00000172208 |        |
| 1524 | 11 | ENSG00000279556 | OR4X2  |
| 1525 | 11 | ENSG00000172769 | OR5B3  |
| 1526 | 11 | ENSG00000149133 | OR5F1  |
| 1527 | 11 | ENSG00000255012 | OR5M1  |
| 1528 | 1  | ENSG00000197532 | OR6Y1  |
| 1529 | 19 | ENSG00000170923 | OR7G2  |
| 1530 | 1  | ENSG00000085840 | ORC1   |
| 1531 | 6  | ENSG00000135336 | ORC3   |
| 1532 | 2  | ENSG00000115947 | ORC4   |

|      |    |                 |          |
|------|----|-----------------|----------|
| 1533 | 16 | ENSG00000091651 | ORC6     |
| 1534 | 20 | ENSG00000130703 | OSBPL2   |
| 1535 | 6  | ENSG00000081087 | OSTM1    |
| 1536 | X  | ENSG00000036473 | OTC      |
| 1537 | 2  | ENSG00000115155 | OTOF     |
| 1538 | 12 | ENSG00000165899 | OTOGL    |
| 1539 | 14 | ENSG00000165588 | OTX2     |
| 1540 | 12 | ENSG00000187950 | OVCH1    |
| 1541 | 5  | ENSG00000083720 | OXCT1    |
| 1542 | 11 | ENSG00000149380 | P4HA3    |
| 1543 | 8  | ENSG00000070756 | PABPC1   |
| 1544 | 11 | ENSG00000175115 | PACS1    |
| 1545 | 14 | ENSG00000179364 | PACS2    |
| 1546 | 17 | ENSG00000007168 | PAFAH1B1 |
| 1547 | 12 | ENSG00000171759 | PAH      |
| 1548 | X  | ENSG00000077264 | PAK3     |
| 1549 | 16 | ENSG00000083093 | PALB2    |
| 1550 | 4  | ENSG00000129116 | PALLD    |
| 1551 | 16 | ENSG00000217930 | PAM16    |
| 1552 | 20 | ENSG00000125779 | PANK2    |
| 1553 | 10 | ENSG00000148832 | PAOX     |
| 1554 | 10 | ENSG00000198682 | PAPSS2   |
| 1555 | 6  | ENSG00000185345 | PARK2    |
| 1556 | 16 | ENSG00000140694 | PARN     |
| 1557 | 1  | ENSG00000143799 | PARP1    |
| 1558 | 3  | ENSG00000173200 | PARP15   |
| 1559 | 5  | ENSG00000151883 | PARP8    |
| 1560 | 3  | ENSG00000138496 | PARP9    |
| 1561 | 12 | ENSG00000177425 | PAWR     |
| 1562 | 20 | ENSG00000125813 | PAX1     |
| 1563 | 10 | ENSG00000075891 | PAX2     |
| 1564 | 2  | ENSG00000135903 | PAX3     |
| 1565 | 11 | ENSG00000007372 | PAX6     |
| 1566 | 2  | ENSG00000125618 | PAX8     |
| 1567 | 14 | ENSG00000198807 | PAX9     |
| 1568 | 11 | ENSG00000173599 | PC       |
| 1569 | 10 | ENSG00000166228 | PCBD1    |
| 1570 | 13 | ENSG00000175198 | PCCA     |
| 1571 | 3  | ENSG00000114054 | PCCB     |
| 1572 | 4  | ENSG00000138650 | PCDH10   |
| 1573 | X  | ENSG00000165194 | PCDH19   |
| 1574 | 5  | ENSG00000204965 | PCDHA5   |
| 1575 | 5  | ENSG00000171815 | PCDHB1   |
| 1576 | 5  | ENSG00000120328 | PCDHB12  |
| 1577 | 5  | ENSG00000253159 | PCDHGA12 |
| 1578 | 5  | ENSG00000262576 | PCDHGA4  |
| 1579 | 5  | ENSG00000262209 | PCDHGB3  |
| 1580 | 11 | ENSG00000165494 | PCF11    |

|      |    |                 |         |
|------|----|-----------------|---------|
| 1581 | 17 | ENSG00000277258 | PCGF2   |
| 1582 | 7  | ENSG00000186472 | PCLO    |
| 1583 | 21 | ENSG00000160299 | PCNT    |
| 1584 | 2  | ENSG00000128655 | PDE11A  |
| 1585 | 5  | ENSG00000113448 | PDE4D   |
| 1586 | 1  | ENSG00000178104 | PDE4DIP |
| 1587 | 17 | ENSG00000185527 | PDE6G   |
| 1588 | 22 | ENSG00000100311 | PDGFB   |
| 1589 | 5  | ENSG00000113721 | PDGFRB  |
| 1590 | X  | ENSG00000131828 | PDHA1   |
| 1591 | 11 | ENSG00000110435 | PDHX    |
| 1592 | 16 | ENSG00000185615 | PDIA2   |
| 1593 | 15 | ENSG00000167004 | PDIA3   |
| 1594 | 3  | ENSG00000065485 | PDIA5   |
| 1595 | 8  | ENSG00000164951 | PDP1    |
| 1596 | 13 | ENSG00000083642 | PDS5B   |
| 1597 | 10 | ENSG00000148459 | PDSS1   |
| 1598 | 6  | ENSG00000164494 | PDSS2   |
| 1599 | 13 | ENSG00000139515 | PDX1    |
| 1600 | 16 | ENSG00000179889 | PDXDC1  |
| 1601 | 8  | ENSG00000134020 | PEBP4   |
| 1602 | 2  | ENSG00000115425 | PECR    |
| 1603 | 19 | ENSG00000198300 | PEG3    |
| 1604 | 19 | ENSG00000124299 | PEPD    |
| 1605 | 19 | ENSG00000229833 | PET100  |
| 1606 | 7  | ENSG00000127980 | PEX1    |
| 1607 | 1  | ENSG00000157911 | PEX10   |
| 1608 | 17 | ENSG00000108733 | PEX12   |
| 1609 | 2  | ENSG00000162928 | PEX13   |
| 1610 | 1  | ENSG00000142655 | PEX14   |
| 1611 | 11 | ENSG00000121680 | PEX16   |
| 1612 | 1  | ENSG00000162735 | PEX19   |
| 1613 | 8  | ENSG00000164751 | PEX2    |
| 1614 | 22 | ENSG00000215193 | PEX26   |
| 1615 | 6  | ENSG00000034693 | PEX3    |
| 1616 | 12 | ENSG00000139197 | PEX5    |
| 1617 | 6  | ENSG00000124587 | PEX6    |
| 1618 | 6  | ENSG00000112357 | PEX7    |
| 1619 | 10 | ENSG00000067057 | PFKP    |
| 1620 | 11 | ENSG00000148985 | PGAP2   |
| 1621 | X  | ENSG00000102144 | PGK1    |
| 1622 | 1  | ENSG00000079739 | PGM1    |
| 1623 | 6  | ENSG00000013375 | PGM3    |
| 1624 | 11 | ENSG00000082175 | PGR     |
| 1625 | 6  | ENSG00000112137 | PHACTR1 |
| 1626 | 17 | ENSG00000109118 | PHF12   |
| 1627 | 8  | ENSG00000129292 | PHF20L1 |
| 1628 | 11 | ENSG00000135365 | PHF21A  |



|      |    |                 |         |
|------|----|-----------------|---------|
| 1629 | X  | ENSG00000156531 | PHF6    |
| 1630 | X  | ENSG00000172943 | PHF8    |
| 1631 | 1  | ENSG00000092621 | PHGDH   |
| 1632 | 4  | ENSG00000109132 | PHOX2B  |
| 1633 | 7  | ENSG00000006576 | PHTF2   |
|      | 4  | ENSG00000038210 |         |
| 1634 | 4  | ENSG00000281028 | PI4K2B  |
| 1635 | 18 | ENSG00000154864 | PIEZO2  |
| 1636 | 17 | ENSG00000108474 | PIGL    |
| 1637 | 9  | ENSG00000165282 | PIGO    |
| 1638 | 20 | ENSG00000124155 | PIGT    |
| 1639 | 1  | ENSG00000060642 | PIGV    |
| 1640 | 1  | ENSG00000133056 | PIK3C2B |
| 1641 | 3  | ENSG00000121879 | PIK3CA  |
| 1642 | 5  | ENSG00000145675 | PIK3R1  |
|      | 19 | ENSG00000105647 |         |
| 1643 | 19 | ENSG00000268173 | PIK3R2  |
| 1644 | 12 | ENSG00000090975 | PITPNM2 |
| 1645 | 4  | ENSG00000164093 | PITX2   |
| 1646 | 10 | ENSG00000107859 | PITX3   |
| 1647 | 16 | ENSG00000008710 | PKD1    |
| 1648 | 7  | ENSG00000158683 | PKD1L1  |
| 1649 | 10 | ENSG00000107593 | PKD2L1  |
| 1650 | 6  | ENSG00000170927 | PKHD1   |
| 1651 | 8  | ENSG00000205038 | PKHD1L1 |
| 1652 | 1  | ENSG00000065243 | PKN2    |
| 1653 | 3  | ENSG00000144837 | PLA1A   |
| 1654 | 16 | ENSG00000103066 | PLA2G15 |
| 1655 | 22 | ENSG00000184381 | PLA2G6  |
| 1656 | 2  | ENSG00000153246 | PLA2R1  |
| 1657 | 20 | ENSG00000182621 | PLCB1   |
| 1658 | 20 | ENSG00000101333 | PLCB4   |
| 1659 | 10 | ENSG00000138193 | PLCE1   |
| 1660 | 1  | ENSG00000149527 | PLCH2   |
| 1661 | 19 | ENSG00000105223 | PLD3    |
| 1662 | 8  | ENSG00000178209 | PLEC    |
| 1663 | 1  | ENSG00000143850 | PLEKHA6 |
| 1664 | 11 | ENSG00000166689 | PLEKHA7 |
| 1665 | 2  | ENSG00000115762 | PLEKHB2 |
| 1666 | 1  | ENSG00000187583 | PLEKHN1 |
| 1667 | 4  | ENSG00000142731 | PLK4    |
| 1668 | 1  | ENSG00000083444 | PLOD1   |
| 1669 | 3  | ENSG00000152952 | PLOD2   |
| 1670 | 7  | ENSG00000106397 | PLOD3   |
| 1671 | X  | ENSG00000123560 | PLP1    |
| 1672 | 10 | ENSG00000120594 | PLXDC2  |
| 1673 | 3  | ENSG00000114554 | PLXNA1  |
| 1674 | 3  | ENSG00000004399 | PLXND1  |

|      |    |                 |          |
|------|----|-----------------|----------|
| 1675 | 15 | ENSG00000140464 | PML      |
| 1676 | 16 | ENSG00000140650 | PMM2     |
| 1677 | 19 | ENSG00000039650 | PNKP     |
| 1678 | 14 | ENSG00000198805 | PNP      |
| 1679 | 19 | ENSG00000032444 | PNPLA6   |
| 1680 | 2  | ENSG00000138035 | PNPT1    |
| 1681 | 3  | ENSG00000164087 | POC1A    |
| 1682 | 3  | ENSG00000114631 | PODXL2   |
| 1683 | 1  | ENSG00000143442 | POGZ     |
| 1684 | X  | ENSG00000101868 | POLA1    |
| 1685 | 19 | ENSG00000062822 | POLD1    |
| 1686 | 15 | ENSG00000140521 | POLG     |
| 1687 | 17 | ENSG00000256525 | POLG2    |
| 1688 | 6  | ENSG00000171453 | POLR1C   |
| 1689 | 13 | ENSG00000186184 | POLR1D   |
| 1690 | 10 | ENSG00000148606 | POLR3A   |
| 1691 | 12 | ENSG00000013503 | POLR3B   |
| 1692 | 1  | ENSG00000085998 | POMGNT1  |
| 1693 | 8  | ENSG00000185900 | POMK     |
| 1694 | 13 | ENSG00000132963 | POMP     |
| 1695 | 9  | ENSG00000130714 | POMT1    |
| 1696 | 14 | ENSG00000009830 | POMT2    |
| 1697 | 7  | ENSG00000127948 | POR      |
| 1698 | X  | ENSG00000102312 | PORCN    |
| 1699 | 3  | ENSG00000064835 | POU1F1   |
| 1700 | 2  | ENSG00000198914 | POU3F3   |
| 1701 | X  | ENSG00000196767 | POU3F4   |
| 1702 | 17 | ENSG00000170836 | PPM1D    |
| 1703 | 1  | ENSG00000143224 | PPOX     |
| 1704 | 19 | ENSG00000104881 | PPP1R13L |
| 1705 | 7  | ENSG00000158528 | PPP1R9A  |
| 1706 | 17 | ENSG00000108819 | PPP1R9B  |
| 1707 | 19 | ENSG00000105568 | PPP2R1A  |
| 1708 | 3  | ENSG00000073711 | PPP2R3A  |
| 1709 | 6  | ENSG00000112640 | PPP2R5D  |
| 1710 | 10 | ENSG00000107758 | PPP3CB   |
| 1711 | 1  | ENSG00000131238 | PPT1     |
| 1712 | X  | ENSG00000102103 | PQBP1    |
| 1713 | 11 | ENSG00000170325 | PRDM10   |
| 1714 | 17 | ENSG00000108946 | PRKAR1A  |
| 1715 | 14 | ENSG00000184304 | PRKD1    |
| 1716 | 8  | ENSG00000253729 | PRKDC    |
| 1717 | 2  | ENSG00000180228 | PRKRA    |
| 1718 | 21 | ENSG00000160310 | PRMT2    |
| 1719 | 2  | ENSG00000115718 | PROC     |
| 1720 | 22 | ENSG00000100033 | PRODH    |
| 1721 | 19 | ENSG00000250799 | PRODH2   |
| 1722 | 2  | ENSG00000155066 | PROM2    |

|      |    |                 |        |
|------|----|-----------------|--------|
| 1723 | 5  | ENSG00000175325 | PROP1  |
| 1724 | 19 | ENSG00000105618 | PRPF31 |
| 1725 | 17 | ENSG00000174231 | PRPF8  |
| 1726 | 6  | ENSG00000112619 | PRPH2  |
| 1727 | X  | ENSG00000147224 | PRPS1  |
| 1728 | 9  | ENSG00000130723 | PRRC2B |
| 1729 | 16 | ENSG00000167371 | PRRT2  |
| 1730 | 4  | ENSG00000164099 | PRSS12 |
| 1731 | 2  | ENSG00000237412 | PRSS56 |
| 1732 | 9  | ENSG00000106772 | PRUNE2 |
| 1733 | 10 | ENSG00000197746 | PSAP   |
| 1734 | 9  | ENSG00000135069 | PSAT1  |
| 1735 | 5  | ENSG00000146005 | PSD2   |
| 1736 | 14 | ENSG00000080815 | PSEN1  |
| 1737 | 6  | ENSG00000204264 | PSMB8  |
| 1738 | 17 | ENSG00000108344 | PSMD3  |
| 1739 | 6  | ENSG00000180822 | PSMG4  |
| 1740 | 7  | ENSG00000146733 | PSPH   |
| 1741 | 9  | ENSG00000185920 | PTCH1  |
| 1742 | 1  | ENSG00000117425 | PTCH2  |
| 1743 | X  | ENSG00000165186 | PTCHD1 |
| 1744 | 6  | ENSG00000244694 | PTCHD4 |
| 1745 | 8  | ENSG00000156471 | PTDSS1 |
| 1746 | 10 | ENSG00000171862 | PTEN   |
| 1747 | 19 | ENSG00000160013 | PTGIR  |
| 1748 | 3  | ENSG00000160801 | PTH1R  |
| 1749 | 12 | ENSG00000087494 | PTHLH  |
| 1750 | 12 | ENSG00000179295 | PTPN11 |
| 1751 | 1  | ENSG00000143851 | PTPN7  |
| 1752 | 20 | ENSG00000132670 | PTPRA  |
| 1753 | 19 | ENSG00000105426 | PTPRS  |
| 1754 | 20 | ENSG00000196090 | PTPRT  |
| 1755 | 17 | ENSG00000141378 | PTRH2  |
| 1756 | 11 | ENSG00000150787 | PTS    |
| 1757 | 2  | ENSG00000055917 | PUM2   |
| 1758 | 5  | ENSG00000185129 | PURA   |
| 1759 | 12 | ENSG00000177192 | PUS1   |
| 1760 | 1  | ENSG00000143217 | PVRL4  |
| 1761 | 15 | ENSG00000279050 | PWAR1  |
| 1762 | 15 | ENSG00000259905 | PWRN1  |
| 1763 | 2  | ENSG00000130508 | PXDN   |
| 1764 | 17 | ENSG00000183010 | PYCR1  |
| 1765 | 1  | ENSG00000143811 | PYCR2  |
| 1766 | 14 | ENSG00000100504 | PYGL   |
| 1767 | 4  | ENSG00000151552 | QDPR   |
| 1768 | 16 | ENSG00000103485 | QPRT   |
| 1769 | 10 | ENSG00000099246 | RAB18  |
| 1770 | 6  | ENSG00000112210 | RAB23  |

|      |    |                 |          |
|------|----|-----------------|----------|
| 1771 | 15 | ENSG00000069974 | RAB27A   |
| 1772 | 8  | ENSG00000104388 | RAB2A    |
| 1773 | 18 | ENSG00000168461 | RAB31    |
| 1774 | X  | ENSG00000155961 | RAB39B   |
| 1775 | 2  | ENSG00000115839 | RAB3GAP1 |
| 1776 | 1  | ENSG00000118873 | RAB3GAP2 |
| 1777 | 1  | ENSG00000152061 | RABGAP1L |
| 1778 | 1  | ENSG00000137955 | RABGGTB  |
| 1779 | 7  | ENSG00000136238 | RAC1     |
| 1780 | 8  | ENSG00000164754 | RAD21    |
| 1781 | 15 | ENSG00000051180 | RAD51    |
| 1782 | 3  | ENSG00000164080 | RAD54L2  |
| 1783 | 3  | ENSG00000132155 | RAF1     |
| 1784 | 17 | ENSG00000108557 | RAI1     |
| 1785 | 20 | ENSG00000188559 | RALGAPA2 |
| 1786 | 2  | ENSG00000153201 | RANBP2   |
| 1787 | 3  | ENSG00000077092 | RARB     |
| 1788 | 5  | ENSG00000113643 | RARS     |
| 1789 | 6  | ENSG00000146282 | RARS2    |
| 1790 | 5  | ENSG00000145715 | RASA1    |
| 1791 | 9  | ENSG00000165105 | RASEF    |
| 1792 | 4  | ENSG00000138670 | RASGEF1B |
| 1793 | 15 | ENSG00000172575 | RASGRP1  |
| 1794 | 10 | ENSG00000107551 | RASSF4   |
| 1795 | 1  | ENSG00000266094 | RASSF5   |
| 1796 | 18 | ENSG00000134438 | RAX      |
| 1797 | 1  | ENSG00000162521 | RBBP4    |
| 1798 | 16 | ENSG00000122257 | RBBP6    |
| 1799 | 18 | ENSG00000101773 | RBBP8    |
| 1800 | 16 | ENSG00000078328 | RBFOX1   |
| 1801 | X  | ENSG00000182872 | RBM10    |
| 1802 | 20 | ENSG00000244462 | RBM12    |
| 1803 | 14 | ENSG00000100461 | RBM23    |
| 1804 | 7  | ENSG00000106344 | RBM28    |
| 1805 | 7  | ENSG00000184863 | RBM33    |
| 1806 | 4  | ENSG00000163694 | RBM47    |
| 1807 | 1  | ENSG00000265241 | RBM8A    |
| 1808 | 2  | ENSG00000153250 | RBMS1    |
| 1809 | 22 | ENSG00000100387 | RBX1     |
| 1810 | 19 | ENSG00000080511 | RDH8     |
| 1811 | 8  | ENSG00000160957 | RECQL4   |
| 1812 | 5  | ENSG00000129625 | REEP5    |
| 1813 | 2  | ENSG00000162924 | REL      |
| 1814 | 7  | ENSG00000189056 | RELN     |
| 1815 | 12 | ENSG00000111404 | RERGL    |
| 1816 | 10 | ENSG00000165731 | RET      |
| 1817 | 17 | ENSG00000169733 | RFNG     |
| 1818 | 3  | ENSG00000163933 | RFT1     |

|      |    |                 |              |
|------|----|-----------------|--------------|
| 1819 | 3  | ENSG00000131378 | RFTN1        |
| 1820 | 9  | ENSG00000080298 | RFX3         |
| 1821 | 6  | ENSG00000185002 | RFX6         |
| 1822 | 15 | ENSG00000181827 | RFX7         |
| 1823 | 1  | ENSG00000121446 | RGSL1        |
| 1824 | 16 | ENSG00000007384 | RHBDF1       |
| 1825 | 8  | ENSG00000008853 | RHOBTB2      |
| 1826 | 12 | ENSG00000111785 | RIC8B        |
| 1827 | 5  | ENSG00000164327 | RICTOR       |
| 1828 | 21 | ENSG00000183421 | RIPK4        |
| 1829 | 1  | ENSG00000143622 | RIT1         |
| 1830 | 15 | ENSG00000140522 | RLBP1        |
| 1831 | 9  | ENSG00000269900 | RMRP         |
| 1832 | 19 | ENSG00000104889 | RNASEH2A     |
| 1833 | 13 | ENSG00000136104 | RNASEH2B     |
| 1834 | 11 | ENSG00000172922 | RNASEH2C     |
| 1835 | 6  | ENSG00000026297 | RNASET2      |
| 1836 | X  | ENSG00000125352 | RNF113A      |
| 1837 | 18 | ENSG00000101695 | RNF125       |
| 1838 | 17 | ENSG00000181481 | RNF135       |
| 1839 | 5  | ENSG00000145860 | RNF145       |
| 1840 | 11 | ENSG00000173456 | RNF26        |
| 1841 | 11 | ENSG00000023191 | RNH1         |
| 1842 | 2  | ENSG00000264229 | RNU4ATAC     |
| 1843 | 3  | ENSG00000169855 | ROBO1        |
| 1844 | 3  | ENSG00000185008 | ROBO2        |
| 1845 | 11 | ENSG00000154134 | ROBO3        |
| 1846 | 16 | ENSG00000067836 | ROGDI        |
| 1847 | 9  | ENSG00000169071 | ROR2         |
| 1848 | 8  | ENSG00000104237 | RP1          |
| 1849 | 16 | ENSG00000205018 | RP11-830F9.6 |
| 1850 | X  | ENSG00000102218 | RP2          |
| 1851 | 1  | ENSG00000116745 | RPE65        |
| 1852 | 14 | ENSG00000092200 | RPGRIP1      |
| 1853 | 16 | ENSG00000103494 | RPGRIP1L     |
| 1854 | 12 | ENSG00000089169 | RPH3A        |
| 1855 | 4  | ENSG00000109475 | RPL34        |
| 1856 | 1  | ENSG00000163125 | RPRD2        |
| 1857 | 19 | ENSG00000105372 | RPS19        |
| 1858 | 2  | ENSG00000143947 | RPS27A       |
| 1859 | X  | ENSG00000177189 | RPS6KA3      |
| 1860 | 1  | ENSG00000215853 | RPTN         |
| 1861 | 17 | ENSG00000141564 | RPTOR        |
| 1862 | 3  | ENSG00000156990 | RPUSD3       |
| 1863 | 8  | ENSG00000048392 | RRM2B        |
| 1864 | 11 | ENSG00000132275 | RRP8         |
| 1865 | 11 | ENSG00000048649 | RSF1         |
| 1866 | 16 | ENSG00000171490 | RSL1D1       |

|      |    |                 |         |
|------|----|-----------------|---------|
| 1867 | 21 | ENSG00000160188 | RSPH1   |
| 1868 | 19 | ENSG00000104941 | RSPH6A  |
| 1869 | 20 | ENSG00000101282 | RSPO4   |
| 1870 | 20 | ENSG00000258366 | RTEL1   |
| 1871 | 15 | ENSG00000137815 | RTF1    |
| 1872 | 17 | ENSG00000185924 | RTN4RL1 |
| 1873 | 11 | ENSG00000186907 | RTN4RL2 |
| 1874 | 18 | ENSG00000176225 | RTTN    |
| 1875 | 21 | ENSG00000159216 | RUNX1   |
| 1876 | 6  | ENSG00000124813 | RUNX2   |
| 1877 | 19 | ENSG00000183207 | RUVBL2  |
| 1878 | 3  | ENSG00000163602 | RYBP    |
| 1879 | 19 | ENSG00000196218 | RYR1    |
| 1880 | 1  | ENSG00000198626 | RYR2    |
| 1881 | 19 | ENSG00000125910 | S1PR4   |
| 1882 | 13 | ENSG00000151835 | SACS    |
| 1883 | 16 | ENSG00000103449 | SALL1   |
| 1884 | 20 | ENSG00000101115 | SALL4   |
| 1885 | 7  | ENSG00000205413 | SAMD9   |
| 1886 | 20 | ENSG00000101347 | SAMHD1  |
| 1887 | 2  | ENSG00000136715 | SAP130  |
| 1888 | 1  | ENSG00000156876 | SASS6   |
| 1889 | 2  | ENSG00000119042 | SATB2   |
| 1890 | 7  | ENSG00000126524 | SBDS    |
| 1891 | 22 | ENSG00000100241 | SBF1    |
| 1892 | 11 | ENSG00000133812 | SBF2    |
| 1893 | 11 | ENSG00000109929 | SC5D    |
| 1894 | 21 | ENSG00000156304 | SCAF4   |
| 1895 | 3  | ENSG00000114650 | SCAP    |
| 1896 | 4  | ENSG00000138760 | SCARB2  |
| 1897 | 22 | ENSG00000244486 | SCARF2  |
| 1898 | 4  | ENSG00000184178 | SCFD2   |
| 1899 | 3  | ENSG00000168356 | SCN11A  |
| 1900 | 2  | ENSG00000144285 | SCN1A   |
| 1901 | 19 | ENSG00000105711 | SCN1B   |
| 1902 | 2  | ENSG00000136531 | SCN2A   |
| 1903 | 2  | ENSG00000153253 | SCN3A   |
| 1904 | 17 | ENSG00000007314 | SCN4A   |
| 1905 | 12 | ENSG00000196876 | SCN8A   |
| 1906 | 1  | ENSG00000162572 | SCNN1D  |
| 1907 | 17 | ENSG00000133028 | SCO1    |
| 1908 | 22 | ENSG00000130489 | SCO2    |
| 1909 | 1  | ENSG00000054282 | SDCCAG8 |
| 1910 | 5  | ENSG00000073578 | SDHA    |
| 1911 | 19 | ENSG00000205138 | SDHAF1  |
| 1912 | 7  | ENSG00000146555 | SDK1    |
| 1913 | 17 | ENSG00000069188 | SDK2    |
| 1914 | 16 | ENSG00000103184 | SEC14L5 |

|      |    |                 |           |
|------|----|-----------------|-----------|
| 1915 | 9  | ENSG00000148396 | SEC16A    |
| 1916 | 20 | ENSG00000101310 | SEC23B    |
| 1917 | 10 | ENSG00000107651 | SEC23IP   |
| 1918 | 7  | ENSG00000075223 | SEMA3C    |
| 1919 | 7  | ENSG00000170381 | SEMA3E    |
| 1920 | 15 | ENSG00000138623 | SEMA7A    |
| 1921 | 3  | ENSG00000119231 | SENP5     |
| 1922 | 4  | ENSG00000109618 | SEPSECS   |
| 1923 | 6  | ENSG00000122335 | SERAC1    |
| 1924 | 18 | ENSG00000166634 | SERPINB12 |
| 1925 | 6  | ENSG00000124570 | SERPINB6  |
| 1926 | 22 | ENSG00000099937 | SERPIND1  |
| 1927 | 9  | ENSG00000119335 | SET       |
| 1928 | 18 | ENSG00000152217 | SETBP1    |
| 1929 | 12 | ENSG00000139718 | SETD1B    |
| 1930 | 3  | ENSG00000181555 | SETD2     |
| 1931 | 21 | ENSG00000185917 | SETD4     |
| 1932 | 3  | ENSG00000168137 | SETD5     |
| 1933 | 1  | ENSG00000143379 | SETDB1    |
| 1934 | 11 | ENSG00000168066 | SF1       |
| 1935 | 1  | ENSG00000183431 | SF3A3     |
| 1936 | 1  | ENSG00000143368 | SF3B4     |
| 1937 | 10 | ENSG00000183605 | SFXN4     |
| 1938 | 7  | ENSG00000127990 | SGCE      |
| 1939 | 20 | ENSG00000101049 | SGK2      |
| 1940 | 14 | ENSG00000126821 | SGPP1     |
| 1941 | 17 | ENSG00000181523 | SGSH      |
| 1942 | 22 | ENSG00000100359 | SGSM3     |
| 1943 | 5  | ENSG00000197860 | SGTB      |
| 1944 | 9  | ENSG00000095370 | SH2D3C    |
| 1945 | 4  | ENSG00000109686 | SH3D19    |
| 1946 | 5  | ENSG00000174705 | SH3PXD2B  |
| 1947 | 11 | ENSG00000162105 | SHANK2    |
| 1948 | 22 | ENSG00000251322 | SHANK3    |
| 1949 | 15 | ENSG00000185634 | SHC4      |
| 1950 | 7  | ENSG00000164690 | SHH       |
| 1951 | 19 | ENSG00000160410 | SHKBP1    |
| 1952 | 10 | ENSG00000108061 | SHOC2     |
| 1953 | X  | ENSG00000185960 | SHOX      |
| 1954 | X  | ENSG00000158352 | SHROOM4   |
| 1955 | 19 | ENSG00000129450 | SIGLEC9   |
| 1956 | 11 | ENSG00000160584 | SIK3      |
| 1957 | 5  | ENSG00000120725 | SIL1      |
| 1958 | 15 | ENSG00000169375 | SIN3A     |
| 1959 | 19 | ENSG00000127511 | SIN3B     |
| 1960 | 20 | ENSG00000101307 | SIRPB1    |
| 1961 | 14 | ENSG00000126778 | SIX1      |
| 1962 | 2  | ENSG00000138083 | SIX3      |

|      |    |                 |          |
|------|----|-----------------|----------|
| 1963 | 19 | ENSG00000177045 | SIX5     |
| 1964 | 17 | ENSG00000141293 | SKAP1    |
| 1965 | 1  | ENSG00000157933 | SKI      |
| 1966 | 3  | ENSG00000136603 | SKIL     |
| 1967 | 6  | ENSG00000204351 | SKIV2L   |
| 1968 | 1  | ENSG00000162723 | SLAMF9   |
| 1969 | 4  | ENSG00000120519 | SLC10A7  |
| 1970 | 15 | ENSG00000074803 | SLC12A1  |
| 1971 | 15 | ENSG00000140199 | SLC12A6  |
| 1972 | 7  | ENSG00000081800 | SLC13A1  |
| 1973 | 1  | ENSG00000155380 | SLC16A1  |
| 1974 | X  | ENSG00000147100 | SLC16A2  |
| 1975 | 6  | ENSG00000119899 | SLC17A5  |
| 1976 | 1  | ENSG00000117479 | SLC19A2  |
| 1977 | 2  | ENSG00000135917 | SLC19A3  |
| 1978 | 5  | ENSG00000197375 | SLC22A5  |
| 1979 | 20 | ENSG00000185052 | SLC24A3  |
| 1980 | 13 | ENSG00000102743 | SLC25A15 |
| 1981 | 3  | ENSG00000178537 | SLC25A20 |
| 1982 | 3  | ENSG00000144659 | SLC25A38 |
| 1983 | 4  | ENSG00000151729 | SLC25A4  |
| 1984 | 5  | ENSG00000155850 | SLC26A2  |
| 1985 | 1  | ENSG00000174502 | SLC26A9  |
| 1986 | 9  | ENSG00000167114 | SLC27A4  |
| 1987 | 1  | ENSG00000117394 | SLC2A1   |
| 1988 | 20 | ENSG00000197496 | SLC2A10  |
| 1989 | 4  | ENSG00000109667 | SLC2A9   |
| 1990 | 1  | ENSG00000196660 | SLC30A10 |
| 1991 | 2  | ENSG00000115194 | SLC30A3  |
| 1992 | 3  | ENSG00000169359 | SLC33A1  |
| 1993 | X  | ENSG00000102100 | SLC35A2  |
| 1994 | 1  | ENSG00000117620 | SLC35A3  |
| 1995 | 11 | ENSG00000181830 | SLC35C1  |
| 1996 | 1  | ENSG00000116704 | SLC35D1  |
| 1997 | 2  | ENSG00000115084 | SLC35F5  |
| 1998 | 5  | ENSG00000186335 | SLC36A2  |
| 1999 | 10 | ENSG00000148482 | SLC39A12 |
| 2000 | 11 | ENSG00000165915 | SLC39A13 |
| 2001 | 14 | ENSG00000165794 | SLC39A2  |
| 2002 | 14 | ENSG00000029364 | SLC39A9  |
| 2003 | 11 | ENSG00000168003 | SLC3A2   |
| 2004 | 1  | ENSG00000158715 | SLC45A3  |
| 2005 | 17 | ENSG00000076351 | SLC46A1  |
| 2006 | 4  | ENSG00000080493 | SLC4A4   |
| 2007 | 20 | ENSG00000101276 | SLC52A3  |
| 2008 | 17 | ENSG00000154025 | SLC5A10  |
| 2009 | 16 | ENSG00000158865 | SLC5A11  |
| 2010 | 19 | ENSG00000105641 | SLC5A5   |



|      |    |                 |            |
|------|----|-----------------|------------|
| 2011 | 2  | ENSG00000138074 | SLC5A6     |
| 2012 | 3  | ENSG00000157103 | SLC6A1     |
| 2013 | 12 | ENSG00000010379 | SLC6A13    |
| 2014 | 1  | ENSG00000197106 | SLC6A17    |
| 2015 | 5  | ENSG00000174358 | SLC6A19    |
| 2016 | 3  | ENSG00000163817 | SLC6A20    |
| 2017 | 5  | ENSG00000142319 | SLC6A3     |
| 2018 | 11 | ENSG00000165970 | SLC6A5     |
| 2019 | X  | ENSG00000130821 | SLC6A8     |
| 2020 | 1  | ENSG00000196517 | SLC6A9     |
| 2021 | 14 | ENSG00000155465 | SLC7A7     |
| 2022 | 5  | ENSG00000066230 | SLC9A3     |
| 2023 | X  | ENSG00000198689 | SLC9A6     |
| 2024 | 12 | ENSG00000205754 | SLCO1B7    |
| 2025 | 16 | ENSG00000188827 | SLX4       |
| 2026 | 18 | ENSG00000141646 | SMAD4      |
| 2027 | 15 | ENSG00000137834 | SMAD6      |
| 2028 | 9  | ENSG00000080503 | SMARCA2    |
| 2029 | 19 | ENSG00000127616 | SMARCA4    |
| 2030 | 2  | ENSG00000138375 | SMARCAL1   |
| 2031 | 22 | ENSG00000099956 | SMARCB1    |
| 2032 | 12 | ENSG00000066117 | SMARCD1    |
| 2033 | 17 | ENSG00000073584 | SMARCE1    |
| 2034 | X  | ENSG00000072501 | SMC1A      |
| 2035 | 10 | ENSG00000108055 | SMC3       |
| 2036 | 14 | ENSG00000100796 | SMEK1      |
| 2037 | 14 | ENSG00000198732 | SMOC1      |
| 2038 | 11 | ENSG00000166311 | SMPD1      |
| 2039 | X  | ENSG00000102172 | SMS        |
| 2040 | 22 | ENSG00000183963 | SMTN       |
| 2041 | 17 | ENSG00000188176 | SMTNL2     |
| 2042 | 9  | ENSG00000122692 | SMU1       |
| 2043 | 20 | ENSG00000132639 | SNAP25     |
| 2044 | 22 | ENSG00000099940 | SNAP29     |
| 2045 | 15 | ENSG00000201831 | SNORD115-1 |
| 2046 | 15 | ENSG00000207063 | SNORD116-1 |
| 2047 | 20 | ENSG00000101298 | SNPH       |
| 2048 | 2  | ENSG00000144028 | SNRNP200   |
| 2049 | 19 | ENSG00000077312 | SNRPA      |
| 2050 | 20 | ENSG00000125835 | SNRPB      |
| 2051 | 15 | ENSG00000128739 | SNRPN      |
| 2052 | 17 | ENSG00000002919 | SNX11      |
| 2053 | 15 | ENSG00000157734 | SNX22      |
| 2054 | 6  | ENSG00000112320 | SOBP       |
| 2055 | 20 | ENSG00000149639 | SOGA1      |
|      | 6  | ENSG00000214338 |            |
| 2056 | 6  | ENSG00000255330 | SOGA3      |
| 2057 | 21 | ENSG00000159140 | SON        |

|      |    |                 |         |
|------|----|-----------------|---------|
| 2058 | 11 | ENSG00000137642 | SORL1   |
| 2059 | 2  | ENSG00000115904 | SOS1    |
| 2060 | 22 | ENSG00000100146 | SOX10   |
| 2061 | 8  | ENSG00000164736 | SOX17   |
| 2062 | 3  | ENSG00000181449 | SOX2    |
| 2063 | 3  | ENSG00000242808 | SOX2-OT |
| 2064 | X  | ENSG00000134595 | SOX3    |
| 2065 | 12 | ENSG00000134532 | SOX5    |
| 2066 | 17 | ENSG00000125398 | SOX9    |
| 2067 | 8  | ENSG00000104450 | SPAG1   |
| 2068 | 5  | ENSG00000113140 | SPARC   |
| 2069 | 2  | ENSG00000021574 | SPAST   |
| 2070 | 20 | ENSG00000158480 | SPATA2  |
| 2071 | 6  | ENSG00000124664 | SPDEF   |
| 2072 | 22 | ENSG00000100014 | SPECC1L |
| 2073 | 1  | ENSG00000065526 | SPEN    |
| 2074 | 15 | ENSG00000104133 | SPG11   |
| 2075 | 16 | ENSG00000197912 | SPG7    |
| 2076 | 19 | ENSG00000063176 | SPHK2   |
| 2077 | 9  | ENSG00000106723 | SPIN1   |
| 2078 | X  | ENSG00000204271 | SPIN3   |
| 2079 | 5  | ENSG00000133710 | SPINK5  |
| 2080 | 5  | ENSG00000152377 | SPOCK1  |
| 2081 | 19 | ENSG00000005206 | SPPL2B  |
| 2082 | 2  | ENSG00000116096 | SPR     |
| 2083 | 15 | ENSG00000166068 | SPRED1  |
| 2084 | 1  | ENSG00000171621 | SPSB1   |
| 2085 | 9  | ENSG00000197694 | SPTAN1  |
| 2086 | 14 | ENSG00000070182 | SPTB    |
| 2087 | 2  | ENSG00000115306 | SPTBN1  |
| 2088 | 11 | ENSG00000173898 | SPTBN2  |
| 2089 | 16 | ENSG00000080603 | SRCAP   |
| 2090 | 4  | ENSG00000128039 | SRD5A3  |
| 2091 | 17 | ENSG00000072310 | SREBF1  |
| 2092 | 1  | ENSG00000266028 | SRGAP2  |
| 2093 | 3  | ENSG00000196220 | SRGAP3  |
| 2094 | 1  | ENSG00000133226 | SRRM1   |
| 2095 | 12 | ENSG00000139767 | SRRM4   |
| 2096 | Y  | ENSG00000184895 | SRY     |
| 2097 | 17 | ENSG00000141298 | SSH2    |
| 2098 | 12 | ENSG00000123096 | SSPN    |
| 2099 | 12 | ENSG00000185482 | STAC3   |
| 2100 | 3  | ENSG00000118007 | STAG1   |
| 2101 | X  | ENSG00000101972 | STAG2   |
| 2102 | 2  | ENSG00000124356 | STAMBP  |
| 2103 | 8  | ENSG00000147465 | STAR    |
| 2104 | 2  | ENSG00000115415 | STAT1   |
| 2105 | 2  | ENSG00000138378 | STAT4   |

|      |    |                 |          |
|------|----|-----------------|----------|
| 2106 | 1  | ENSG00000123473 | STIL     |
| 2107 | 4  | ENSG00000109689 | STIM2    |
| 2108 | 15 | ENSG00000137868 | STRA6    |
| 2109 | X  | ENSG00000101846 | STS      |
| 2110 | 11 | ENSG00000134910 | STT3A    |
| 2111 | 3  | ENSG00000163527 | STT3B    |
| 2112 | 16 | ENSG00000103266 | STUB1    |
| 2113 | 9  | ENSG00000136854 | STXBP1   |
| 2114 | 13 | ENSG00000136143 | SUCLA2   |
| 2115 | 2  | ENSG00000163541 | SUCLG1   |
| 2116 | 10 | ENSG00000107882 | SUFU     |
| 2117 | 3  | ENSG00000144455 | SUMF1    |
| 2118 | 12 | ENSG00000139531 | SUOX     |
| 2119 | 17 | ENSG00000109111 | SUPT6H   |
| 2120 | 9  | ENSG00000148290 | SURF1    |
| 2121 | 1  | ENSG00000143502 | SUSD4    |
| 2122 | 1  | ENSG00000159164 | SV2A     |
| 2123 | 9  | ENSG00000165124 | SVEP1    |
| 2124 | X  | ENSG00000008056 | SYN1     |
| 2125 | 3  | ENSG00000157152 | SYN2     |
| 2126 | 6  | ENSG00000131018 | SYNE1    |
| 2127 | 14 | ENSG00000054654 | SYNE2    |
| 2128 | 6  | ENSG00000197283 | SYNGAP1  |
| 2129 | 21 | ENSG00000159082 | SYNJ1    |
| 2130 | X  | ENSG00000102003 | SYP      |
| 2131 | 22 | ENSG00000100324 | TAB1     |
| 2132 | 12 | ENSG00000166863 | TAC3     |
| 2133 | 10 | ENSG00000138162 | TACC2    |
| 2134 | 17 | ENSG00000136463 | TACO1    |
| 2135 | X  | ENSG00000147133 | TAF1     |
| 2136 | 8  | ENSG00000064313 | TAF2     |
| 2137 | 6  | ENSG00000137413 | TAF8     |
| 2138 | 2  | ENSG00000115183 | TANC1    |
| 2139 | 17 | ENSG00000170921 | TANC2    |
| 2140 | 16 | ENSG00000198650 | TAT      |
| 2141 | X  | ENSG00000102125 | TAZ      |
| 2142 | 4  | ENSG00000065882 | TBC1D1   |
| 2143 | 19 | ENSG00000104946 | TBC1D17  |
| 2144 | 20 | ENSG00000125875 | TBC1D20  |
| 2145 | 6  | ENSG00000065491 | TBC1D22B |
| 2146 | 16 | ENSG00000162065 | TBC1D24  |
| 2147 | 13 | ENSG00000136111 | TBC1D4   |
| 2148 | 1  | ENSG00000116957 | TBCE     |
| 2149 | 3  | ENSG00000177565 | TBL1XR1  |
| 2150 | 16 | ENSG00000183751 | TBL3     |
| 2151 | 2  | ENSG00000136535 | TBR1     |
| 2152 | 11 | ENSG00000154144 | TBRG1    |
| 2153 | 22 | ENSG00000184058 | TBX1     |

|      |    |                 |        |
|------|----|-----------------|--------|
| 2154 | 7  | ENSG00000164532 | TBX20  |
|      | X  | ENSG00000122145 |        |
| 2155 | X  | ENSG00000281700 | TBX22  |
| 2156 | 12 | ENSG00000135111 | TBX3   |
| 2157 | 17 | ENSG00000121075 | TBX4   |
| 2158 | 12 | ENSG00000089225 | TBX5   |
| 2159 | 7  | ENSG00000059377 | TBXAS1 |
| 2160 | 15 | ENSG00000140262 | TCF12  |
| 2161 | 22 | ENSG00000100207 | TCF20  |
| 2162 | 19 | ENSG00000071564 | TCF3   |
| 2163 | 18 | ENSG00000196628 | TCF4   |
| 2164 | 10 | ENSG00000148737 | TCF7L2 |
| 2165 | 22 | ENSG00000185339 | TCN2   |
| 2166 | 5  | ENSG00000070814 | TCOF1  |
| 2167 | 12 | ENSG00000168778 | TCTN2  |
| 2168 | 10 | ENSG00000119977 | TCTN3  |
| 2169 | 10 | ENSG00000095627 | TDRD1  |
| 2170 | 2  | ENSG00000218819 | TDRD15 |
| 2171 | 12 | ENSG00000197905 | TEAD4  |
| 2172 | 11 | ENSG00000109927 | TECTA  |
| 2173 | 9  | ENSG00000120156 | TEK    |
| 2174 | 17 | ENSG00000125409 | TEKT3  |
| 2175 | 16 | ENSG00000153060 | TEKT5  |
| 2176 | 5  | ENSG00000164362 | TERT   |
| 2177 | 6  | ENSG00000137203 | TFAP2A |
| 2178 | 6  | ENSG00000008196 | TFAP2B |
| 2179 | X  | ENSG00000068323 | TFE3   |
| 2180 | 7  | ENSG00000105967 | TFEC   |
| 2181 | 3  | ENSG00000072274 | TFRC   |
| 2182 | 8  | ENSG00000042832 | TG     |
| 2183 | 13 | ENSG00000088451 | TGDS   |
| 2184 | 19 | ENSG00000105329 | TGFB1  |
| 2185 | 9  | ENSG00000106799 | TGFBR1 |
| 2186 | 3  | ENSG00000163513 | TGFBR2 |
| 2187 | 18 | ENSG00000177426 | TGIF1  |
| 2188 | 20 | ENSG00000166948 | TGM6   |
| 2189 | 11 | ENSG00000180176 | TH     |
| 2190 | 16 | ENSG00000131652 | THOC6  |
| 2191 | 17 | ENSG00000126351 | THRA   |
| 2192 | 3  | ENSG00000151090 | THRB   |
| 2193 | 19 | ENSG00000104980 | TIMM44 |
| 2194 | X  | ENSG00000126953 | TIMM8A |
| 2195 | 9  | ENSG00000119139 | TJP2   |
| 2196 | 19 | ENSG00000105289 | TJP3   |
| 2197 | 16 | ENSG00000166548 | TK2    |
| 2198 | 3  | ENSG00000163931 | TKT    |
| 2199 | 19 | ENSG00000065717 | TLE2   |
| 2200 | 15 | ENSG00000140332 | TLE3   |

|      |    |                 |          |
|------|----|-----------------|----------|
| 2201 | 17 | ENSG00000146872 | TLK2     |
| 2202 | 4  | ENSG00000174125 | TLR1     |
| 2203 | 12 | ENSG00000064115 | TM7SF3   |
| 2204 | 15 | ENSG00000166069 | TMCO5A   |
| 2205 | 17 | ENSG00000185332 | TMEM105  |
| 2206 | 4  | ENSG00000168936 | TMEM129  |
| 2207 | 11 | ENSG00000149483 | TMEM138  |
| 2208 | 4  | ENSG00000170006 | TMEM154  |
| 2209 | 4  | ENSG00000134851 | TMEM165  |
| 2210 | 19 | ENSG00000105518 | TMEM205  |
| 2211 | 2  | ENSG00000119777 | TMEM214  |
| 2212 | 11 | ENSG00000187049 | TMEM216  |
| 2213 | 16 | ENSG00000205084 | TMEM231  |
| 2214 | 5  | ENSG00000186952 | TMEM232  |
| 2215 | 2  | ENSG00000155755 | TMEM237  |
| 2216 | 1  | ENSG00000205090 | TMEM240  |
| 2217 | 3  | ENSG00000169964 | TMEM42   |
| 2218 | 3  | ENSG00000181458 | TMEM45A  |
| 2219 | 12 | ENSG00000118600 | TMEM5    |
| 2220 | 1  | ENSG00000143001 | TMEM61   |
| 2221 | 6  | ENSG00000137216 | TMEM63B  |
| 2222 | 14 | ENSG00000165548 | TMEM63C  |
| 2223 | 8  | ENSG00000164953 | TMEM67   |
| 2224 | 8  | ENSG00000175606 | TMEM70   |
| 2225 | 2  | ENSG00000153214 | TMEM87B  |
| 2226 | 16 | ENSG00000129925 | TMEM8A   |
| 2227 | 21 | ENSG00000154646 | TMPRSS15 |
| 2228 | 22 | ENSG00000187045 | TMPRSS6  |
| 2229 | 12 | ENSG00000133687 | TMTC1    |
| 2230 | 14 | ENSG00000185215 | TNFAIP2  |
| 2231 | 1  | ENSG00000157873 | TNFRSF14 |
| 2232 | 3  | ENSG00000061938 | TNK2     |
| 2233 | 8  | ENSG00000173273 | TNKS     |
| 2234 | 11 | ENSG00000149115 | TNKS1BP1 |
| 2235 | 10 | ENSG00000107854 | TNKS2    |
| 2236 | 1  | ENSG00000120332 | TNN      |
| 2237 | 7  | ENSG00000064419 | TNPO3    |
| 2238 | 7  | ENSG00000182095 | TNRC18   |
| 2239 | 16 | ENSG00000090905 | TNRC6A   |
| 2240 | 6  | ENSG00000168477 | TNXB     |
| 2241 | 17 | ENSG00000141232 | TOB1     |
| 2242 | 3  | ENSG00000077097 | TOP2B    |
| 2243 | 9  | ENSG00000136827 | TOR1A    |
| 2244 | 8  | ENSG00000198846 | TOX      |
| 2245 | 3  | ENSG00000073282 | TP63     |
| 2246 | 7  | ENSG00000196511 | TPK1     |
| 2247 | 2  | ENSG00000115705 | TPO      |
| 2248 | 11 | ENSG00000166340 | TPP1     |

|      |    |                 |          |
|------|----|-----------------|----------|
| 2249 | 3  | ENSG00000188001 | TPRG1    |
| 2250 | 9  | ENSG00000176058 | TPRN     |
| 2251 | 11 | ENSG00000175104 | TRAF6    |
| 2252 | 3  | ENSG00000182606 | TRAK1    |
| 2253 | X  | ENSG00000196459 | TRAPPC2  |
| 2254 | 8  | ENSG00000167632 | TRAPPC9  |
|      | 3  | ENSG00000213689 |          |
| 2255 | 3  | ENSG00000280804 | TREX1    |
| 2256 | 9  | ENSG00000119401 | TRIM32   |
| 2257 | 17 | ENSG00000108395 | TRIM37   |
| 2258 | 11 | ENSG00000132256 | TRIM5    |
| 2259 | 11 | ENSG00000166007 | TRIM51HP |
| 2260 | 11 | ENSG00000121236 | TRIM6    |
| 2261 | 14 | ENSG00000100505 | TRIM9    |
| 2262 | 5  | ENSG00000038382 | TRIO     |
| 2263 | 22 | ENSG00000100106 | TRIOBP   |
| 2264 | 19 | ENSG00000125733 | TRIP10   |
| 2265 | 14 | ENSG00000100815 | TRIP11   |
| 2266 | 2  | ENSG00000153827 | TRIP12   |
| 2267 | 4  | ENSG00000145331 | TRMT10A  |
| 2268 | 22 | ENSG00000099899 | TRMT2A   |
| 2269 | X  | ENSG00000072315 | TRPC5    |
| 2270 | 15 | ENSG00000134160 | TRPM1    |
| 2271 | 21 | ENSG00000142185 | TRPM2    |
| 2272 | 11 | ENSG00000070985 | TRPM5    |
| 2273 | 9  | ENSG00000119121 | TRPM6    |
| 2274 | 15 | ENSG00000092439 | TRPM7    |
| 2275 | 8  | ENSG00000104447 | TRPS1    |
| 2276 | 12 | ENSG00000111199 | TRPV4    |
| 2277 | 7  | ENSG00000196367 | TRRAP    |
| 2278 | 9  | ENSG00000165699 | TSC1     |
| 2279 | 16 | ENSG00000103197 | TSC2     |
| 2280 | 3  | ENSG00000154743 | TSEN2    |
| 2281 | 17 | ENSG00000182173 | TSEN54   |
| 2282 | 12 | ENSG00000123297 | TSFM     |
| 2283 | 1  | ENSG00000134200 | TSHB     |
| 2284 | 14 | ENSG00000165409 | TSHR     |
| 2285 | 19 | ENSG00000126467 | TSKS     |
| 2286 | 8  | ENSG00000171045 | TSNARE1  |
| 2287 | 7  | ENSG00000106025 | TSPAN12  |
| 2288 | X  | ENSG00000156298 | TSPAN7   |
| 2289 | 6  | ENSG00000189241 | TSPYL1   |
| 2290 | 6  | ENSG00000146216 | TTBK1    |
| 2291 | 17 | ENSG00000011295 | TTC19    |
| 2292 | 2  | ENSG00000123607 | TTC21B   |
| 2293 | 2  | ENSG00000018699 | TTC27    |
| 2294 | 5  | ENSG00000198677 | TTC37    |
| 2295 | 9  | ENSG00000155158 | TTC39B   |

|      |    |                 |         |
|------|----|-----------------|---------|
| 2296 | 2  | ENSG00000068724 | TTC7A   |
| 2297 | 14 | ENSG00000165533 | TTC8    |
| 2298 | 11 | ENSG00000162222 | TTC9C   |
| 2299 | 8  | ENSG00000129696 | TTI2    |
| 2300 | 2  | ENSG00000155657 | TTN     |
| 2301 | 12 | ENSG00000167552 | TUBA1A  |
| 2302 | 22 | ENSG00000183785 | TUBA8   |
| 2303 | 6  | ENSG00000137267 | TUBB2A  |
| 2304 | 6  | ENSG00000137285 | TUBB2B  |
|      | 16 | ENSG00000198211 |         |
| 2305 | 16 | ENSG00000258947 | TUBB3   |
| 2306 | 19 | ENSG00000104833 | TUBB4A  |
| 2307 | 22 | ENSG00000128159 | TUBGCP6 |
| 2308 | 8  | ENSG00000104723 | TUSC3   |
| 2309 | 11 | ENSG00000149016 | TUT1    |
| 2310 | 7  | ENSG00000122691 | TWIST1  |
| 2311 | 1  | ENSG00000117862 | TXNDC12 |
| 2312 | 11 | ENSG00000077498 | TYR     |
| 2313 | 9  | ENSG00000107165 | TYRP1   |
| 2314 | X  | ENSG00000130985 | UBA1    |
| 2315 | X  | ENSG00000077721 | UBE2A   |
| 2316 | 3  | ENSG00000170142 | UBE2E1  |
| 2317 | 15 | ENSG00000114062 | UBE3A   |
| 2318 | 12 | ENSG00000151148 | UBE3B   |
| 2319 | 1  | ENSG00000130939 | UBE4B   |
| 2320 | 13 | ENSG00000122042 | UBL3    |
| 2321 | 15 | ENSG00000159459 | UBR1    |
| 2322 | 8  | ENSG00000104517 | UBR5    |
| 2323 | 1  | ENSG00000116750 | UCHL5   |
| 2324 | 2  | ENSG00000241635 | UGT1A1  |
| 2325 | 5  | ENSG00000145626 | UGT3A1  |
| 2326 | 15 | ENSG00000140474 | ULK3    |
| 2327 | 21 | ENSG00000177398 | UMODL1  |
| 2328 | 3  | ENSG00000114491 | UMPS    |
| 2329 | 2  | ENSG00000144406 | UNC80   |
| 2330 | 22 | ENSG00000100024 | UPB1    |
| 2331 | 19 | ENSG00000005007 | UPF1    |
| 2332 | 10 | ENSG00000151461 | UPF2    |
| 2333 | X  | ENSG00000125351 | UPF3B   |
| 2334 | 3  | ENSG00000010256 | UQCRC1  |
| 2335 | 16 | ENSG00000140740 | UQCRC2  |
| 2336 | 5  | ENSG00000164405 | UQCRQ   |
| 2337 | 3  | ENSG00000159650 | UROC1   |
| 2338 | 10 | ENSG00000188690 | UROS    |
| 2339 | 18 | ENSG00000101557 | USP14   |
| 2340 | X  | ENSG00000124486 | USP9X   |
| 2341 | 4  | ENSG00000163945 | UVSSA   |
| 2342 | 16 | ENSG00000103043 | VAC14   |

|      |    |                 |         |
|------|----|-----------------|---------|
| 2343 | 1  | ENSG00000173218 | VANGL1  |
| 2344 | 18 | ENSG00000101558 | VAPA    |
| 2345 | 10 | ENSG00000148704 | VAX1    |
| 2346 | 12 | ENSG00000111424 | VDR     |
| 2347 | 17 | ENSG00000136451 | VEZF1   |
| 2348 | 3  | ENSG00000136059 | VILL    |
| 2349 | 6  | ENSG00000146469 | VIP     |
| 2350 | 14 | ENSG00000151445 | VIPAS39 |
| 2351 | 16 | ENSG00000167397 | VKORC1  |
| 2352 | 9  | ENSG00000147852 | VLDLR   |
| 2353 | 8  | ENSG00000132549 | VPS13B  |
| 2354 | 1  | ENSG00000048707 | VPS13D  |
| 2355 | 15 | ENSG00000184056 | VPS33B  |
| 2356 | 8  | ENSG00000155975 | VPS37A  |
| 2357 | 15 | ENSG00000166887 | VPS39   |
| 2358 | 17 | ENSG00000141252 | VPS53   |
| 2359 | 14 | ENSG00000100749 | VRK1    |
| 2360 | 2  | ENSG00000028116 | VRK2    |
| 2361 | 14 | ENSG00000119614 | VSX2    |
| 2362 | 10 | ENSG00000151532 | VTI1A   |
| 2363 | 10 | ENSG00000165816 | VWA2    |
| 2364 | 7  | ENSG00000146530 | VWDE    |
| 2365 | 12 | ENSG00000110799 | VWF     |
| 2366 | 10 | ENSG00000095787 | WAC     |
| 2367 | 10 | ENSG00000128815 | WDFY4   |
| 2368 | 2  | ENSG00000143951 | WDPCP   |
| 2369 | 10 | ENSG00000120008 | WDR11   |
| 2370 | 4  | ENSG00000157796 | WDR19   |
| 2371 | 9  | ENSG00000148225 | WDR31   |
| 2372 | 2  | ENSG00000118965 | WDR35   |
| 2373 | X  | ENSG00000196998 | WDR45   |
| 2374 | 7  | ENSG00000126870 | WDR60   |
| 2375 | 19 | ENSG00000075702 | WDR62   |
| 2376 | 15 | ENSG00000177082 | WDR73   |
| 2377 | 17 | ENSG00000167716 | WDR81   |
| 2378 | 11 | ENSG00000166483 | WEE1    |
| 2379 | 4  | ENSG00000109501 | WFS1    |
| 2380 | 4  | ENSG00000109685 | WHSC1   |
| 2381 | 19 | ENSG00000011451 | WIZ     |
| 2382 | 12 | ENSG00000060237 | WNK1    |
| 2383 | 9  | ENSG00000165238 | WNK2    |
| 2384 | 12 | ENSG00000125084 | WNT1    |
| 2385 | 12 | ENSG00000169884 | WNT10B  |
| 2386 | 17 | ENSG00000108379 | WNT3    |
| 2387 | 3  | ENSG00000114251 | WNT5A   |
| 2388 | 3  | ENSG00000154764 | WNT7A   |
| 2389 | 5  | ENSG00000061492 | WNT8A   |
| 2390 | 8  | ENSG00000165392 | WRN     |



|      |    |                 |            |
|------|----|-----------------|------------|
| 2391 | 11 | ENSG00000184937 | WT1        |
| 2392 | 5  | ENSG00000113645 | WWC1       |
| 2393 | 16 | ENSG00000186153 | WVOX       |
| 2394 | 3  | ENSG00000168334 | XIRP1      |
| 2395 | 2  | ENSG00000163092 | XIRP2      |
| 2396 | 9  | ENSG00000136936 | XPA        |
| 2397 | 3  | ENSG00000154767 | XPC        |
| 2398 | 22 | ENSG00000196236 | XPNPEP3    |
| 2399 | 1  | ENSG00000143324 | XPR1       |
| 2400 | 16 | ENSG00000103489 | XYLT1      |
| 2401 | 11 | ENSG00000137693 | YAP1       |
| 2402 | 11 | ENSG00000174851 | YIF1A      |
| 2403 | 17 | ENSG00000108953 | YWHAE      |
| 2404 | 14 | ENSG00000126804 | ZBTB1      |
| 2405 | 11 | ENSG00000109906 | ZBTB16     |
| 2406 | 1  | ENSG00000179456 | ZBTB18     |
| 2407 | 3  | ENSG00000181722 | ZBTB20     |
| 2408 | 3  | ENSG00000241560 | ZBTB20-AS1 |
| 2409 | 6  | ENSG00000112365 | ZBTB24     |
| 2410 | 1  | ENSG00000185278 | ZBTB37     |
| 2411 | 1  | ENSG00000177888 | ZBTB41     |
| 2412 | X  | ENSG00000126970 | ZC4H2      |
| 2413 | 2  | ENSG00000204186 | ZDBF2      |
| 2414 | X  | ENSG00000188706 | ZDHC9      |
| 2415 | 2  | ENSG00000169554 | ZEB2       |
| 2416 | 8  | ENSG00000091656 | ZFHX4      |
| 2417 | 6  | ENSG00000204644 | ZFP57      |
| 2418 | 14 | ENSG00000072121 | ZFYVE26    |
| 2419 | 4  | ENSG00000159733 | ZFYVE28    |
| 2420 | 13 | ENSG00000043355 | ZIC2       |
| 2421 | X  | ENSG00000156925 | ZIC3       |
| 2422 | 19 | ENSG00000269699 | ZIM2       |
| 2423 | 1  | ENSG00000084073 | ZMPSTE24   |
| 2424 | 1  | ENSG00000146463 | ZMYM4      |
| 2425 | 10 | ENSG00000015171 | ZMYND11    |
| 2426 | 20 | ENSG00000125846 | ZNF133     |
| 2427 | 2  | ENSG00000115568 | ZNF142     |
| 2428 | 11 | ENSG00000166478 | ZNF143     |
| 2429 | 19 | ENSG00000167635 | ZNF146     |
| 2430 | 19 | ENSG00000105497 | ZNF175     |
| 2431 | 3  | ENSG00000186448 | ZNF197     |
| 2432 | 17 | ENSG00000010244 | ZNF207     |
| 2433 | 11 | ENSG00000149054 | ZNF215     |
| 2434 | 20 | ENSG00000171940 | ZNF217     |
| 2435 | 19 | ENSG00000256294 | ZNF225     |
| 2436 | 20 | ENSG00000131061 | ZNF341     |
| 2437 | 1  | ENSG00000160094 | ZNF362     |
| 2438 | 10 | ENSG00000138311 | ZNF365     |

|      |    |                 |         |
|------|----|-----------------|---------|
| 2439 | X  | ENSG00000147124 | ZNF41   |
| 2440 | 7  | ENSG00000181444 | ZNF467  |
| 2441 | 7  | ENSG00000185177 | ZNF479  |
| 2442 | 18 | ENSG00000101493 | ZNF516  |
| 2443 | 8  | ENSG00000197363 | ZNF517  |
| 2444 | 19 | ENSG00000198597 | ZNF536  |
| 2445 | 19 | ENSG00000118156 | ZNF541  |
| 2446 | 19 | ENSG00000251369 | ZNF550  |
| 2447 | 15 | ENSG00000166716 | ZNF592  |
| 2448 | 1  | ENSG00000122482 | ZNF644  |
| 2449 | X  | ENSG00000251192 | ZNF674  |
| 2450 | X  | ENSG00000147180 | ZNF711  |
| 2451 | 12 | ENSG00000139651 | ZNF740  |
| 2452 | 16 | ENSG00000170100 | ZNF778  |
| 2453 | 7  | ENSG00000204946 | ZNF783  |
| 2454 | 19 | ENSG00000223547 | ZNF844  |
| 2455 | 20 | ENSG00000124201 | ZNFX1   |
| 2456 | 10 | ENSG00000019995 | ZRANB1  |
| 2457 | 2  | ENSG00000121988 | ZRANB3  |
| 2458 | 6  | ENSG00000158691 | ZSCAN12 |
| 2459 | 5  | ENSG00000130449 | ZSWIM6  |
| 2460 | 10 | ENSG00000122952 | ZWINT   |
| 2461 | 1  | ENSG00000036549 | ZZZ3    |

## Schizophrenia

| Gene Number | Chromosome | Gene ID         | Gene Name  |
|-------------|------------|-----------------|------------|
| 1           | 12         | ENSG00000150967 | ABCB9      |
| 2           | 14         | ENSG00000280188 | AC005477.1 |
| 3           | 16         | ENSG00000102977 | ACD        |
| 4           | 16         | ENSG00000166743 | ACSM1      |
| 5           | 20         | ENSG00000101442 | ACTR5      |
| 6           | 2          | ENSG00000114948 | ADAM23     |
| 7           | 5          | ENSG00000145536 | ADAMTS16   |
| 8           | 5          | ENSG00000049192 | ADAMTS6    |
| 9           | 15         | ENSG00000156218 | ADAMTSL3   |
| 10          | 11         | ENSG00000148926 | ADM        |
| 11          | 22         | ENSG00000100077 | ADRBK2     |
| 12          | 15         | ENSG00000166748 | AGBL1      |
| 13          | 14         | ENSG00000142208 | AKT1       |
| 14          | 1          | ENSG00000117020 | AKT3       |
| 15          | 3          | ENSG00000023330 | ALAS1      |
| 16          | 16         | ENSG00000149925 | ALDOA      |
| 17          | 3          | ENSG00000242849 | ALDOAP1    |
| 18          | 11         | ENSG00000110497 | AMBRA1     |
| 19          | 11         | ENSG00000166025 | AMOTL1     |
| 20          | 10         | ENSG00000151150 | ANK3       |
| 21          | 17         | ENSG00000185722 | ANKFY1     |

|    |    |                 |          |
|----|----|-----------------|----------|
| 22 | 12 | ENSG00000167612 | ANKRD33  |
| 23 | 2  | ENSG00000065413 | ANKRD44  |
| 24 | 15 | ENSG00000230778 | ANKRD63  |
| 25 | 12 | ENSG00000185046 | ANKS1B   |
| 26 | 11 | ENSG00000171714 | ANO5     |
| 27 | 1  | ENSG00000143401 | ANP32E   |
| 28 | 4  | ENSG00000163297 | ANTXR2   |
| 29 | 9  | ENSG00000135046 | ANXA1    |
| 30 | 1  | ENSG00000117362 | APH1A    |
| 31 | 22 | ENSG00000128335 | APOL2    |
| 32 | 22 | ENSG00000100336 | APOL4    |
| 33 | 14 | ENSG00000256053 | APOPT1   |
| 34 | 11 | ENSG00000175220 | ARHGAP1  |
| 35 | 3  | ENSG00000031081 | ARHGAP31 |
| 36 | X  | ENSG00000089820 | ARHGAP4  |
| 37 | 10 | ENSG00000138175 | ARL3     |
| 38 | 12 | ENSG00000182196 | ARL6IP4  |
| 39 | 11 | ENSG00000133794 | ARNTL    |
| 40 | 10 | ENSG00000214435 | AS3MT    |
| 41 | 16 | ENSG00000174939 | ASPHD1   |
| 42 | 9  | ENSG00000148219 | ASTN2    |
| 43 | 11 | ENSG00000175224 | ATG13    |
| 44 | 1  | ENSG00000018625 | ATP1A2   |
| 45 | 12 | ENSG00000174437 | ATP2A2   |
| 46 | 2  | ENSG00000230482 | ATP5G2P3 |
| 47 | 19 | ENSG00000105341 | ATP5SL   |
| 48 | 17 | ENSG00000171953 | ATPAF2   |
| 49 | 3  | ENSG00000163635 | ATXN7    |
| 50 | 9  | ENSG00000148090 | AUH      |
| 51 | 14 | ENSG00000166170 | BAG5     |
| 52 | 6  | ENSG00000204463 | BAG6     |
| 53 | 4  | ENSG00000153064 | BANK1    |
| 54 | 3  | ENSG00000163930 | BAP1     |
| 55 | 14 | ENSG00000127152 | BCL11B   |
| 56 | 1  | ENSG00000116128 | BCL9     |
| 57 | 2  | ENSG00000152430 | BOLL     |
| 58 | 22 | ENSG00000100425 | BRD1     |
| 59 | 11 | ENSG00000233436 | BTBD18   |
| 60 | 6  | ENSG00000124508 | BTN2A2   |
| 61 | 6  | ENSG00000026950 | BTN3A1   |
| 62 | 6  | ENSG00000186470 | BTN3A2   |
| 63 | 10 | ENSG00000166275 | C10orf32 |
| 64 | 11 | ENSG00000211450 | C11orf31 |
| 65 | 11 | ENSG00000185742 | C11orf87 |
| 66 | 12 | ENSG00000179088 | C12orf42 |
| 67 | 12 | ENSG00000130921 | C12orf65 |
|    | 12 | ENSG00000257242 |          |
|    | 12 | ENSG00000279037 |          |

|     |    |                 |          |
|-----|----|-----------------|----------|
| 68  | 12 | ENSG00000280112 | C12orf79 |
| 69  | 16 | ENSG00000159761 | C16orf86 |
| 70  | 16 | ENSG00000167194 | C16orf92 |
| 71  | 1  | ENSG00000203709 | C1orf132 |
| 72  | 1  | ENSG00000118292 | C1orf54  |
| 73  | 2  | ENSG00000162972 | C2orf47  |
| 74  | 2  | ENSG00000178074 | C2orf69  |
| 75  | 2  | ENSG00000182600 | C2orf82  |
| 76  | 3  | ENSG00000163632 | C3orf49  |
| 77  | 4  | ENSG00000056050 | C4orf27  |
| 78  | 1  | ENSG00000118298 | CA14     |
| 79  | 8  | ENSG00000178538 | CA8      |
| 80  | 12 | ENSG00000151067 | CACNA1C  |
| 81  | 22 | ENSG00000100346 | CACNA1I  |
| 82  | 10 | ENSG00000165995 | CACNB2   |
| 83  | 17 | ENSG00000075429 | CACNG5   |
| 84  | 10 | ENSG00000185933 | CALHM1   |
| 85  | 10 | ENSG00000138172 | CALHM2   |
| 86  | 10 | ENSG00000183128 | CALHM3   |
| 87  | 7  | ENSG00000183166 | CALN1    |
| 88  | 17 | ENSG00000260785 | CASC17   |
| 89  | 3  | ENSG00000145075 | CCDC39   |
| 90  | 12 | ENSG00000183273 | CCDC60   |
| 91  | 18 | ENSG00000166510 | CCDC68   |
| 92  | 5  | ENSG00000170458 | CD14     |
| 93  | 1  | ENSG00000117335 | CD46     |
| 94  | 5  | ENSG00000158402 | CDC25C   |
| 95  | 16 | ENSG00000140945 | CDH13    |
| 96  | 12 | ENSG00000111328 | CDK2AP1  |
| 97  | 14 | ENSG00000100526 | CDKN3    |
| 98  | 19 | ENSG00000007129 | CEACAM21 |
| 99  | 2  | ENSG00000115816 | CEBPZ    |
| 100 | 22 | ENSG00000100162 | CENPM    |
| 101 | 16 | ENSG00000102901 | CENPT    |
| 102 | 1  | ENSG00000143702 | CEP170   |
| 103 | 2  | ENSG00000188452 | CERKL    |
| 104 | 22 | ENSG00000100399 | CHADL    |
| 105 | 1  | ENSG00000133048 | CHI3L1   |
| 106 | 11 | ENSG00000180720 | CHRM4    |
| 107 | 15 | ENSG00000080644 | CHRNA3   |
| 108 | 15 | ENSG00000169684 | CHRNA5   |
| 109 | 15 | ENSG00000117971 | CHRNB4   |
| 110 | 19 | ENSG00000124302 | CHST8    |
| 111 | 19 | ENSG00000160161 | CILP2    |
| 112 | 11 | ENSG00000175216 | CKAP5    |
| 113 | 14 | ENSG00000166165 | CKB      |
| 114 | 19 | ENSG00000105205 | CLC      |
| 115 | 4  | ENSG00000109572 | CLCN3    |

|     |    |                 |          |
|-----|----|-----------------|----------|
| 116 | 3  | ENSG00000163347 | CLDN1    |
| 117 | 11 | ENSG00000172409 | CLP1     |
| 118 | 9  | ENSG00000122705 | CLTA     |
| 119 | 8  | ENSG00000120885 | CLU      |
| 120 | 12 | ENSG00000174600 | CMKLR1   |
| 121 | X  | ENSG00000149970 | CNKSR2   |
| 122 | 10 | ENSG00000148842 | CNNM2    |
| 123 | 16 | ENSG00000125107 | CNOT1    |
| 124 | 3  | ENSG00000144619 | CNTN4    |
| 125 | 11 | ENSG00000149972 | CNTN5    |
| 126 | 7  | ENSG00000174469 | CNTNAP2  |
| 127 | 2  | ENSG00000155052 | CNTNAP5  |
| 128 | 4  | ENSG00000188517 | COL25A1  |
| 129 | 3  | ENSG00000144810 | COL8A1   |
| 130 | 5  | ENSG00000145781 | COMMD10  |
| 131 | 22 | ENSG00000093010 | COMT     |
| 132 | 2  | ENSG00000115520 | COQ10B   |
| 133 | 6  | ENSG00000231162 | COX11P1  |
| 134 | 1  | ENSG00000197721 | CR1L     |
| 135 | 11 | ENSG00000157613 | CREB3L1  |
| 136 | X  | ENSG00000198223 | CSF2RA   |
| 137 | 8  | ENSG00000183117 | CSMD1    |
| 138 | 15 | ENSG00000259726 | CSPG4P11 |
| 139 | 16 | ENSG00000102974 | CTCF     |
| 140 | 18 | ENSG00000060069 | CTDP1    |
| 141 | 5  | ENSG00000044115 | CTNNA1   |
| 142 | 2  | ENSG00000066032 | CTNNA2   |
| 143 | 10 | ENSG00000183230 | CTNNA3   |
| 144 | 11 | ENSG00000198561 | CTNND1   |
| 145 | 16 | ENSG00000141086 | CTRL     |
| 146 | 5  | ENSG00000205279 | CTXN3    |
| 147 | 2  | ENSG00000036257 | CUL3     |
| 148 | 10 | ENSG00000107562 | CXCL12   |
| 149 | 17 | ENSG00000167740 | CYB5D2   |
| 150 | X  | ENSG00000233548 | CYCSP44  |
| 151 | 10 | ENSG00000148795 | CYP17A1  |
| 152 | 2  | ENSG00000003137 | CYP26B1  |
| 153 | 22 | ENSG00000100197 | CYP2D6   |
| 154 | 22 | ENSG00000226450 | CYP2D8P  |
| 155 | 12 | ENSG00000110887 | DAO      |
| 156 | 13 | ENSG00000182346 | DAOA     |
| 157 | 1  | ENSG00000143164 | DCAF6    |
| 158 | 12 | ENSG00000151065 | DCP1B    |
| 159 | 7  | ENSG00000132437 | DDC      |
| 160 | 9  | ENSG00000230360 | DDX10P2  |
| 161 | 16 | ENSG00000182810 | DDX28    |
| 162 | 7  | ENSG00000105928 | DFNA5    |
| 163 | 7  | ENSG00000157680 | DGKI     |

|     |    |                 |          |
|-----|----|-----------------|----------|
| 164 | 11 | ENSG00000149091 | DGKZ     |
| 165 | 1  | ENSG00000162946 | DISC1    |
| 166 | 1  | ENSG00000274121 | DISC2    |
| 167 | 8  | ENSG00000164741 | DLC1     |
| 168 | 3  | ENSG00000114841 | DNAH1    |
| 169 | 3  | ENSG00000205981 | DNAJC19  |
| 170 | 5  | ENSG00000256453 | DND1     |
| 171 | 16 | ENSG00000149927 | DOC2A    |
| 172 | 16 | ENSG00000167261 | DPEP2    |
| 173 | 16 | ENSG00000141096 | DPEP3    |
| 174 | 2  | ENSG00000197635 | DPP4     |
| 175 | 1  | ENSG00000188641 | DPYD     |
| 176 | 1  | ENSG00000232878 | DPYD-AS1 |
| 177 | 1  | ENSG00000235777 | DPYD-AS2 |
| 178 | 1  | ENSG00000232542 | DPYD-IT1 |
| 179 | 11 | ENSG00000149295 | DRD2     |
| 180 | 3  | ENSG00000151577 | DRD3     |
| 181 | 17 | ENSG00000108591 | DRG2     |
| 182 | 16 | ENSG00000038358 | EDC4     |
| 183 | 2  | ENSG00000115468 | EFHD1    |
| 184 | 15 | ENSG00000259404 | EFTUD1P1 |
| 185 | 5  | ENSG00000120738 | EGR1     |
| 186 | 11 | ENSG00000135373 | EHF      |
| 187 | 2  | ENSG00000233426 | EIF3FP3  |
| 188 | 1  | ENSG00000075151 | EIF4G3   |
| 189 | 1  | ENSG00000162618 | ELTD1    |
| 190 | 16 | ENSG00000124074 | ENKD1    |
| 191 | 1  | ENSG00000074800 | ENO1     |
| 192 | 22 | ENSG00000100393 | EP300    |
| 193 | 2  | ENSG00000135999 | EPC2     |
| 194 | 8  | ENSG00000120915 | EPHX2    |
| 195 | 3  | ENSG00000187672 | ERC2     |
| 196 | 16 | ENSG00000175595 | ERCC4    |
| 197 | 11 | ENSG00000149564 | ESAM     |
| 198 | 16 | ENSG00000103067 | ESRP2    |
| 199 | 5  | ENSG00000120705 | ETF1     |
| 200 | 6  | ENSG00000112685 | EXOC2    |
| 201 | 11 | ENSG00000180210 | F2       |
| 202 | 1  | ENSG00000226766 | FABP7P1  |
| 203 | 22 | ENSG00000177096 | FAM109B  |
| 204 | 8  | ENSG00000169122 | FAM110B  |
| 205 | 13 | ENSG00000204442 | FAM155A  |
| 206 | 5  | ENSG00000120709 | FAM53C   |
| 207 | 16 | ENSG00000149926 | FAM57B   |
| 208 | 1  | ENSG00000154511 | FAM69A   |
| 209 | 2  | ENSG00000115392 | FANCL    |
| 210 | 2  | ENSG00000116120 | FARSB    |
| 211 | 3  | ENSG00000237806 | FAUP2    |

|     |    |                 |           |
|-----|----|-----------------|-----------|
| 212 | 2  | ENSG00000138081 | FBXO11    |
| 213 | 1  | ENSG00000143226 | FCGR2A    |
| 214 | 1  | ENSG00000203747 | FCGR3A    |
| 215 | 15 | ENSG00000182511 | FES       |
| 216 | 11 | ENSG00000149557 | FEZ1      |
| 217 | 1  | ENSG00000172456 | FGGY      |
| 218 | 2  | ENSG00000182263 | FIGN      |
| 219 | 3  | ENSG00000239516 | FLYWCH1P1 |
| 220 | 7  | ENSG00000122687 | FTSJ2     |
| 221 | 15 | ENSG00000140564 | FURIN     |
| 222 | 6  | ENSG00000172461 | FUT9      |
| 223 | 9  | ENSG00000165060 | FXN       |
| 224 | 3  | ENSG00000114416 | FXR1      |
| 225 | 6  | ENSG00000204681 | GABBR1    |
| 226 | 6  | ENSG00000146276 | GABRR1    |
| 227 | 5  | ENSG00000164574 | GALNT10   |
| 228 | 19 | ENSG00000167491 | GATAD2A   |
| 229 | 4  | ENSG00000227725 | GCOM2     |
| 230 | 16 | ENSG00000102886 | GDPD3     |
| 231 | 16 | ENSG00000141098 | GFOD2     |
| 232 | 5  | ENSG00000146013 | GFRA3     |
| 233 | 17 | ENSG00000141034 | GID4      |
| 234 | 2  | ENSG00000204120 | GIGYF2    |
| 235 | 1  | ENSG00000187513 | GJA4      |
| 236 | 9  | ENSG00000122694 | GLIPR2    |
| 237 | 12 | ENSG00000151948 | GLT1D1    |
| 238 | 3  | ENSG00000016864 | GLT8D1    |
| 239 | 3  | ENSG00000168237 | GLYCK     |
| 240 | 19 | ENSG00000089639 | GMIP      |
| 241 | 9  | ENSG00000159921 | GNE       |
| 242 | 3  | ENSG00000163938 | GNL3      |
| 243 | 15 | ENSG00000184206 | GOLGA6L4  |
| 244 | 15 | ENSG00000230373 | GOLGA6L5P |
| 245 | 2  | ENSG00000063660 | GPC1      |
| 246 | 4  | ENSG00000150625 | GPM6A     |
| 247 | 2  | ENSG00000183671 | GPR1      |
| 248 | 1  | ENSG00000077585 | GPR137B   |
| 249 | 6  | ENSG00000224586 | GPX5      |
| 250 | 6  | ENSG00000198704 | GPX6      |
| 251 | 11 | ENSG00000023171 | GRAMD1B   |
| 252 | 7  | ENSG00000106070 | GRB10     |
| 253 | 5  | ENSG00000155511 | GRIA1     |
| 254 | 21 | ENSG00000171189 | GRIK1     |
| 255 | 1  | ENSG00000163873 | GRIK3     |
| 256 | 16 | ENSG00000183454 | GRIN2A    |
| 257 | 7  | ENSG00000198822 | GRM3      |
| 258 | 2  | ENSG00000121964 | GTDC1     |
| 259 | 8  | ENSG00000234770 | GULOP     |

|     |    |                 |            |
|-----|----|-----------------|------------|
| 260 | 19 | ENSG00000187664 | HAPLN4     |
| 261 | 11 | ENSG00000180423 | HARBI1     |
| 262 | 5  | ENSG00000170445 | HARS       |
| 263 | 5  | ENSG00000112855 | HARS2      |
| 264 | 5  | ENSG00000164588 | HCN1       |
| 265 | 2  | ENSG00000068024 | HDAC4      |
| 266 | 1  | ENSG00000054392 | HHAT       |
| 267 | 16 | ENSG00000149929 | HIRIP3     |
| 268 | 6  | ENSG00000196787 | HIST1H2AG  |
| 269 | 6  | ENSG00000124635 | HIST1H2BJ  |
| 270 | 6  | ENSG00000185130 | HIST1H2BL  |
| 271 | 6  | ENSG00000196735 | HLA-DQA1   |
| 272 | 6  | ENSG00000196126 | HLA-DRB1   |
| 273 | 6  | ENSG00000196301 | HLA-DRB9   |
| 274 | 3  | ENSG00000244101 | HMGN1P10   |
| 275 | 17 | ENSG00000262333 | HNRNPA1P16 |
| 276 | 6  | ENSG00000249853 | HS3ST5     |
| 277 | 1  | ENSG00000173110 | HSPA6      |
| 278 | 5  | ENSG00000113013 | HSPA9      |
| 279 | 2  | ENSG00000144381 | HSPD1      |
| 280 | 2  | ENSG00000115541 | HSPE1      |
| 281 | 2  | ENSG00000270757 | HSPE1-MOB4 |
| 282 | 13 | ENSG00000102468 | HTR2A      |
| 283 | 21 | ENSG00000142149 | HUNK       |
| 284 | 1  | ENSG00000137965 | IFI44      |
| 285 | 1  | ENSG00000137959 | IFI44L     |
| 286 | 9  | ENSG00000096872 | IFT74      |
| 287 | 13 | ENSG00000032742 | IFT88      |
| 288 | 11 | ENSG00000080854 | IGSF9B     |
| 289 | 5  | ENSG00000113141 | IK         |
| 290 | 2  | ENSG00000115008 | IL1A       |
| 291 | 2  | ENSG00000115590 | IL1R2      |
| 292 | X  | ENSG00000185291 | IL3RA      |
| 293 | 7  | ENSG00000184903 | IMMP2L     |
| 294 | 10 | ENSG00000148798 | INA        |
| 295 | 16 | ENSG00000169592 | INO80E     |
| 296 | 2  | ENSG00000168918 | INPP5D     |
| 297 | 7  | ENSG00000186480 | INSIG1     |
| 298 | 15 | ENSG00000136381 | IREB2      |
| 299 | 1  | ENSG00000168264 | IRF2BP2    |
| 300 | 3  | ENSG00000055957 | ITIH1      |
| 301 | 3  | ENSG00000162267 | ITIH3      |
| 302 | 3  | ENSG00000055955 | ITIH4      |
| 303 | 3  | ENSG00000239799 | ITIH4-AS1  |
| 304 | 2  | ENSG00000198399 | ITSN2      |
| 305 | 11 | ENSG00000183340 | JRKL       |
| 306 | 16 | ENSG00000262962 | KARSP3     |
| 307 | 20 | ENSG00000158445 | KCNB1      |



|     |    |                 |           |
|-----|----|-----------------|-----------|
| 308 | 2  | ENSG00000115474 | KCNJ13    |
| 309 | 17 | ENSG00000123700 | KCNJ2     |
|     | 3  | ENSG00000197584 |           |
| 310 | 3  | ENSG00000275163 | KCNMB2    |
| 311 | 8  | ENSG00000164794 | KCNV1     |
| 312 | 16 | ENSG00000174943 | KCTD13    |
| 313 | 5  | ENSG00000120733 | KDM3B     |
| 314 | 1  | ENSG00000066135 | KDM4A     |
| 315 | 1  | ENSG00000162849 | KIF26B    |
| 316 | 2  | ENSG00000168280 | KIF5C     |
| 317 | 14 | ENSG00000126214 | KLC1      |
| 318 | 15 | ENSG00000183655 | KLHL25    |
| 319 | 7  | ENSG00000239569 | KMT2E-AS1 |
| 320 | 22 | ENSG00000100395 | L3MBTL2   |
| 321 | 16 | ENSG00000213398 | LCAT      |
| 322 | 19 | ENSG00000226025 | LGALS17A  |
| 323 | 15 | ENSG00000259527 | LINC00052 |
| 324 | 6  | ENSG00000235570 | LINC00533 |
| 325 | 22 | ENSG00000205704 | LINC00634 |
| 326 | 15 | ENSG00000259728 | LINC00933 |
| 327 | 7  | ENSG00000228393 | LINC01004 |
| 328 | 2  | ENSG00000205054 | LINC01121 |
| 329 | 19 | ENSG00000064547 | LPAR2     |
| 330 | 4  | ENSG00000150471 | LPHN3     |
| 331 | 12 | ENSG00000123384 | LRP1      |
| 332 | 17 | ENSG00000171962 | LRRC48    |
| 333 | 2  | ENSG00000124831 | LRRFIP1   |
| 334 | 1  | ENSG00000162620 | LRRIQ3    |
| 335 | 8  | ENSG00000175324 | LSM1      |
| 336 | 11 | ENSG00000187398 | LUZP2     |
| 337 | 2  | ENSG00000150556 | LYPD6B    |
| 338 | 3  | ENSG00000157093 | LYZL4     |
| 339 | 7  | ENSG00000002822 | MAD1L1    |
| 340 | 5  | ENSG00000112893 | MAN2A1    |
| 341 | 15 | ENSG00000196547 | MAN2A2    |
| 342 | 14 | ENSG00000006432 | MAP3K9    |
| 343 | 2  | ENSG00000071054 | MAP4K4    |
| 344 | 16 | ENSG00000102882 | MAPK3     |
| 345 | 2  | ENSG00000247626 | MARS2     |
| 346 | 19 | ENSG00000129933 | MAU2      |
| 347 | 5  | ENSG00000171444 | MCC       |
| 348 | 11 | ENSG00000110492 | MDK       |
| 349 | X  | ENSG00000169057 | MECP2     |
| 350 | 11 | ENSG00000156603 | MED19     |
| 351 | 5  | ENSG00000081189 | MEF2C     |
| 352 | 5  | ENSG00000248309 | MEF2C-AS1 |
| 353 | 8  | ENSG00000275264 | MIR1204   |
| 354 | 12 | ENSG00000221365 | MIR1228   |

|     |    |                 |           |
|-----|----|-----------------|-----------|
| 355 | 22 | ENSG00000221160 | MIR1281   |
| 356 | 10 | ENSG00000221767 | MIR1307   |
| 357 | 11 | ENSG00000208009 | MIR130A   |
| 358 | 3  | ENSG00000207926 | MIR135A1  |
| 359 | 1  | ENSG00000277990 | MIR137    |
| 360 | 1  | ENSG00000225206 | MIR137HG  |
| 361 | 22 | ENSG00000207932 | MIR33A    |
| 362 | 22 | ENSG00000263463 | MIR378I   |
| 363 | 8  | ENSG00000199127 | MIR383    |
| 364 | 12 | ENSG00000265526 | MIR4304   |
| 365 | 18 | ENSG00000264571 | MIR4529   |
| 366 | 1  | ENSG00000265201 | MIR4677   |
| 367 | X  | ENSG00000221466 | MIR548AJ2 |
| 368 | 19 | ENSG00000207821 | MIR640    |
| 369 | 3  | ENSG00000199150 | MIRLET7G  |
| 370 | 22 | ENSG00000196588 | MKL1      |
| 371 | 8  | ENSG00000156103 | MMP16     |
| 372 | 2  | ENSG00000124003 | MOGAT1    |
| 373 | 12 | ENSG00000051825 | MPHOSPH9  |
| 374 | 7  | ENSG00000105926 | MPP6      |
| 375 | 11 | ENSG00000120458 | MSANTD2   |
| 376 | 3  | ENSG00000174579 | MSL2      |
| 377 | 8  | ENSG00000175806 | MSRA      |
| 378 | 1  | ENSG00000177000 | MTHFR     |
| 379 | 3  | ENSG00000272573 | MUSTN1    |
| 380 | 17 | ENSG00000091536 | MYO15A    |
| 381 | 13 | ENSG00000041515 | MYO16     |
| 382 | 22 | ENSG00000133454 | MYO18B    |
| 383 | 12 | ENSG00000166866 | MYO1A     |
| 384 | 12 | ENSG00000166886 | NAB2      |
| 385 | 22 | ENSG00000198951 | NAGA      |
| 386 | 13 | ENSG00000102452 | NALCN     |
| 387 | 19 | ENSG00000130287 | NCAN      |
| 388 | 3  | ENSG00000158092 | NCK1      |
| 389 | 4  | ENSG00000164100 | NDST3     |
| 390 | 19 | ENSG00000186010 | NDUFA13   |
| 391 | 5  | ENSG00000131495 | NDUFA2    |
| 392 | 12 | ENSG00000185633 | NDUFA4L2  |
| 393 | 22 | ENSG00000184983 | NDUFA6    |
| 394 | 4  | ENSG00000137601 | NEK1      |
| 395 | 3  | ENSG00000114904 | NEK4      |
| 396 | 2  | ENSG00000115488 | NEU2      |
| 397 | 16 | ENSG00000072736 | NFATC3    |
| 398 | 7  | ENSG00000050344 | NFE2L3    |
| 399 | 9  | ENSG00000165030 | NFIL3     |
| 400 | 4  | ENSG00000109320 | NFKB1     |
| 401 | 1  | ENSG00000233557 | NFU1P2    |
| 402 | 2  | ENSG00000066248 | NGEF      |

|     |    |                  |         |
|-----|----|------------------|---------|
| 403 | 3  | ENSG00000010322  | NISCH   |
| 404 | 6  | ENSG000000188580 | NKAIN2  |
| 405 | 6  | ENSG000000189134 | NKAPL   |
| 406 | X  | ENSG000000146938 | NLGN4X  |
| 407 | 16 | ENSG000000140853 | NLRC5   |
| 408 | 5  | ENSG000000132911 | NMUR2   |
| 409 | 1  | ENSG000000198929 | NOS1AP  |
| 410 | 19 | ENSG000000142546 | NOSIP   |
| 411 | 6  | ENSG000000204301 | NOTCH4  |
| 412 | 14 | ENSG000000151322 | NPAS3   |
| 413 | 2  | ENSG000000213104 | NPM1P46 |
| 414 | 8  | ENSG000000157168 | NRG1    |
| 415 | 10 | ENSG000000185737 | NRG3    |
| 416 | 11 | ENSG000000154146 | NRGN    |
| 417 | 16 | ENSG000000188038 | NRN1L   |
| 418 | 10 | ENSG000000099250 | NRP1    |
| 419 | 10 | ENSG000000241058 | NSUN6   |
| 420 | 10 | ENSG000000076685 | NT5C2   |
| 421 | 3  | ENSG000000168268 | NT5DC2  |
| 422 | 15 | ENSG000000140538 | NTRK3   |
| 423 | 14 | ENSG000000151413 | NUBPL   |
| 424 | 7  | ENSG000000106268 | NUDT1   |
| 425 | 16 | ENSG000000102898 | NUTF2   |
| 426 | 12 | ENSG000000182379 | NXPH4   |
| 427 | 12 | ENSG000000111325 | OGFOD2  |
| 428 | 22 | ENSG000000213790 | OLA1P1  |
| 429 | 12 | ENSG000000179919 | OR10A7  |
| 430 | 12 | ENSG000000175398 | OR10P1  |
| 431 | 6  | ENSG000000219262 | OR2E1P  |
| 432 | 11 | ENSG000000255303 | OR5BA1P |
| 433 | 12 | ENSG000000205330 | OR6C1   |
| 434 | 12 | ENSG000000179695 | OR6C2   |
| 435 | 12 | ENSG000000205329 | OR6C3   |
| 436 | 12 | ENSG000000179626 | OR6C4   |
| 437 | 12 | ENSG000000188324 | OR6C6   |
| 438 | 12 | ENSG000000205328 | OR6C65  |
| 439 | 12 | ENSG000000205327 | OR6C68  |
| 440 | 12 | ENSG000000184954 | OR6C70  |
| 441 | 12 | ENSG000000197706 | OR6C74  |
| 442 | 12 | ENSG000000187857 | OR6C75  |
| 443 | 12 | ENSG000000185821 | OR6C76  |
| 444 | 12 | ENSG000000170605 | OR9K2   |
| 445 | 7  | ENSG000000070882 | OSBPL3  |
| 446 | 1  | ENSG000000264522 | OTUD7B  |
|     | 15 | ENSG000000137843 |         |
| 447 | 15 | ENSG000000259288 | PAK6    |
| 448 | 4  | ENSG000000129116 | PALLD   |
| 449 | 10 | ENSG000000148498 | PARD3   |

|     |    |                 |           |
|-----|----|-----------------|-----------|
| 450 | 16 | ENSG00000102981 | PARD6A    |
| 451 | 3  | ENSG00000163939 | PBRM1     |
| 452 | 19 | ENSG00000105717 | PBX4      |
| 453 | 4  | ENSG00000251321 | PCAT4     |
| 454 | 3  | ENSG00000114054 | PCCB      |
|     | 13 | ENSG00000197991 |           |
| 455 | 13 | ENSG00000280165 | PCDH20    |
| 456 | 5  | ENSG00000204970 | PCDHA1    |
| 457 | 5  | ENSG00000250120 | PCDHA10   |
| 458 | 5  | ENSG00000204969 | PCDHA2    |
| 459 | 5  | ENSG00000255408 | PCDHA3    |
| 460 | 5  | ENSG00000204967 | PCDHA4    |
| 461 | 5  | ENSG00000204965 | PCDHA5    |
| 462 | 5  | ENSG00000081842 | PCDHA6    |
| 463 | 5  | ENSG00000204963 | PCDHA7    |
| 464 | 5  | ENSG00000204962 | PCDHA8    |
| 465 | 5  | ENSG00000204961 | PCDHA9    |
|     | 2  | ENSG00000227418 |           |
| 466 | 2  | ENSG00000278406 | PCGEM1    |
| 467 | 10 | ENSG00000156374 | PCGF6     |
| 468 | 10 | ENSG00000148843 | PDCD11    |
| 469 | 5  | ENSG00000113448 | PDE4D     |
| 470 | 1  | ENSG00000174827 | PDZK1     |
| 471 | 6  | ENSG00000137338 | PGBD1     |
| 472 | 3  | ENSG00000010318 | PHF7      |
| 473 | X  | ENSG00000172943 | PHF8      |
| 474 | 2  | ENSG00000153823 | PID1      |
| 475 | 11 | ENSG00000011405 | PIK3C2A   |
| 476 | 12 | ENSG00000139144 | PIK3C2G   |
| 477 | 12 | ENSG00000090975 | PITPNM2   |
| 478 | X  | ENSG00000181191 | PJA1      |
| 479 | 11 | ENSG00000165495 | PKNOX2    |
| 480 | 16 | ENSG00000103066 | PLA2G15   |
| 481 | 9  | ENSG00000137055 | PLAA      |
| 482 | 15 | ENSG00000137841 | PLCB2     |
| 483 | 15 | ENSG00000259307 | PLCB2-AS1 |
| 484 | 1  | ENSG00000149527 | PLCH2     |
| 485 | 2  | ENSG00000115896 | PLCL1     |
| 486 | 1  | ENSG00000023902 | PLEKHO1   |
| 487 | 7  | ENSG00000128567 | PODXL     |
| 488 | 15 | ENSG00000255529 | POLR2M    |
| 489 | 6  | ENSG00000158553 | POM121L2  |
| 490 | 6  | ENSG00000184486 | POU3F2    |
| 491 | 4  | ENSG00000138777 | PPA2      |
| 492 | 12 | ENSG00000139220 | PPFIA2    |
| 493 | 3  | ENSG00000164088 | PPM1M     |
| 494 | 14 | ENSG00000088808 | PPP1R13B  |
| 495 | 20 | ENSG00000101445 | PPP1R16B  |

|     |    |                 |         |
|-----|----|-----------------|---------|
| 496 | 5  | ENSG00000156475 | PPP2R2B |
| 497 | 3  | ENSG00000073711 | PPP2R3A |
| 498 | 16 | ENSG00000149923 | PPP4C   |
| 499 | 5  | ENSG00000132356 | PRKAA1  |
| 500 | 1  | ENSG00000067606 | PRKCZ   |
| 501 | 14 | ENSG00000184304 | PRKD1   |
| 502 | 2  | ENSG00000115825 | PRKD3   |
| 503 | 22 | ENSG00000100033 | PRODH   |
| 504 | 19 | ENSG00000126464 | PRR12   |
| 505 | 6  | ENSG00000204469 | PRRC2A  |
| 506 | 19 | ENSG00000126460 | PRRG2   |
| 507 | 6  | ENSG00000112812 | PRSS16  |
| 508 | 16 | ENSG00000159792 | PSKH1   |
| 509 | 15 | ENSG00000041357 | PSMA4   |
| 510 | 16 | ENSG00000205220 | PSMB10  |
| 511 | 3  | ENSG00000163636 | PSMD6   |
| 512 | 1  | ENSG00000117569 | PTBP2   |
| 513 | 20 | ENSG00000124212 | PTGIS   |
| 514 | 7  | ENSG00000105894 | PTN     |
| 515 | 1  | ENSG00000142949 | PTPRF   |
| 516 | 7  | ENSG00000155093 | PTPRN2  |
| 517 | 12 | ENSG00000151490 | PTPRO   |
| 518 | 1  | ENSG00000060656 | PTPRU   |
| 519 | 7  | ENSG00000091127 | PUS7    |
| 520 | 8  | ENSG00000249859 | PVT1    |
| 521 | 2  | ENSG00000115828 | QPCT    |
| 522 | 12 | ENSG00000179912 | R3HDM2  |
| 523 | 4  | ENSG00000250040 | RAF1P1  |
| 524 | 17 | ENSG00000108557 | RAI1    |
| 525 | 16 | ENSG00000141084 | RANBP10 |
| 526 | 22 | ENSG00000100401 | RANGAP1 |
| 527 | 5  | ENSG00000113319 | RASGRF2 |
| 528 | 19 | ENSG00000142552 | RCN3    |
| 529 | 9  | ENSG00000122707 | RECK    |
| 530 | 5  | ENSG00000132563 | REEP2   |
| 531 | 2  | ENSG00000115386 | REG1A   |
| 532 | 2  | ENSG00000172023 | REG1B   |
| 533 | 2  | ENSG00000143954 | REG3G   |
| 534 | 7  | ENSG00000189056 | RELN    |
| 535 | X  | ENSG00000102032 | RENBP   |
| 536 | 1  | ENSG00000142599 | RERE    |
| 537 | 3  | ENSG00000163933 | RFT1    |
| 538 | 2  | ENSG00000162944 | RFTN2   |
| 539 | 14 | ENSG00000182732 | RGS6    |
| 540 | 12 | ENSG00000150977 | RILPL2  |
| 541 | 6  | ENSG00000079841 | RIMS1   |
| 542 | 20 | ENSG00000132669 | RIN2    |
| 543 | 16 | ENSG00000159753 | RLTPR   |

|     |    |                 |           |
|-----|----|-----------------|-----------|
| 544 | 9  | ENSG00000137075 | RNF38     |
| 545 | 3  | ENSG00000169855 | ROBO1     |
| 546 | 3  | ENSG00000185008 | ROBO2     |
| 547 | 9  | ENSG00000169071 | ROR2      |
| 548 | 15 | ENSG00000069667 | RORA      |
| 549 | 1  | ENSG00000226128 | RPL26P9   |
| 550 | 16 | ENSG00000240435 | RPS12P27  |
| 551 | 19 | ENSG00000126458 | RRAS      |
| 552 | 22 | ENSG00000040608 | RTN4R     |
| 553 | 7  | ENSG00000244490 | RWDD4P1   |
| 554 | 9  | ENSG00000186350 | RXRA      |
| 555 | 2  | ENSG00000119042 | SATB2     |
| 556 | 12 | ENSG00000139697 | SBNO1     |
| 557 | 19 | ENSG00000126461 | SCAF1     |
| 558 | 2  | ENSG00000115884 | SDC1      |
| 559 | 1  | ENSG00000054282 | SDCCAG8   |
| 560 | 1  | ENSG00000120341 | SEC16B    |
| 561 | 1  | ENSG00000228057 | SEC63P1   |
| 562 | 7  | ENSG00000075213 | SEMA3A    |
| 563 | 3  | ENSG00000010319 | SEMA3G    |
| 564 | 22 | ENSG00000100167 | Sep-03    |
| 565 | 11 | ENSG00000149131 | SERPING1  |
| 566 | 12 | ENSG00000183955 | SETD8     |
| 567 | 16 | ENSG00000174938 | SEZ6L2    |
| 568 | 2  | ENSG00000115524 | SF3B1     |
| 569 | 3  | ENSG00000163935 | SFMBT1    |
| 570 | 10 | ENSG00000156398 | SFXN2     |
| 571 | 8  | ENSG00000185053 | SGCZ      |
| 572 | 6  | ENSG00000118515 | SGK1      |
| 573 | 2  | ENSG00000163082 | SGPP2     |
| 574 | 17 | ENSG00000141258 | SGSM2     |
| 575 | 22 | ENSG00000251322 | SHANK3    |
| 576 | 22 | ENSG00000234965 | SHISA8    |
| 577 | 12 | ENSG00000182199 | SHMT2     |
| 578 | 1  | ENSG00000117090 | SLAMF1    |
| 579 | 5  | ENSG00000064651 | SLC12A2   |
| 580 | 16 | ENSG00000124067 | SLC12A4   |
| 581 | 6  | ENSG00000124568 | SLC17A1   |
| 582 | 6  | ENSG00000124564 | SLC17A3   |
| 583 | 11 | ENSG00000091664 | SLC17A6   |
| 584 | 9  | ENSG00000106688 | SLC1A1    |
| 585 | 6  | ENSG00000137266 | SLC22A23  |
| 586 | 22 | ENSG00000215347 | SLC25A5P1 |
| 587 | 1  | ENSG00000174502 | SLC26A9   |
| 588 | 6  | ENSG00000146411 | SLC2A12   |
| 589 | 20 | ENSG00000101438 | SLC32A1   |
| 590 | 11 | ENSG00000110660 | SLC35F2   |
| 591 | 3  | ENSG00000168917 | SLC35G2   |

|     |    |                 |          |
|-----|----|-----------------|----------|
| 592 | 16 | ENSG00000103042 | SLC38A7  |
| 593 | 4  | ENSG00000138821 | SLC39A8  |
| 594 | 1  | ENSG00000162426 | SLC45A1  |
| 595 | 2  | ENSG00000144290 | SLC4A10  |
| 596 | 16 | ENSG00000103064 | SLC7A6   |
| 597 | 16 | ENSG00000103061 | SLC7A6OS |
| 598 | 15 | ENSG00000176463 | SLCO3A1  |
| 599 | 5  | ENSG00000205359 | SLCO6A1  |
| 600 | 9  | ENSG00000080503 | SMARCA2  |
| 601 | 22 | ENSG00000183172 | SMDT1    |
| 602 | 16 | ENSG00000157106 | SMG1     |
| 603 | 17 | ENSG00000070366 | SMG6     |
| 604 | 3  | ENSG00000168273 | SMIM4    |
| 605 | 6  | ENSG00000065609 | SNAP91   |
| 606 | 8  | ENSG00000147481 | SNTG1    |
| 607 | 11 | ENSG00000120451 | SNX19    |
| 608 | 7  | ENSG00000106266 | SNX8     |
| 609 | 3  | ENSG00000242808 | SOX2-OT  |
| 610 | 2  | ENSG00000144451 | SPAG16   |
| 611 | 2  | ENSG00000196141 | SPATS2L  |
| 612 | 3  | ENSG00000114902 | SPCS1    |
| 613 | 2  | ENSG00000144228 | SPOPL    |
| 614 | 9  | ENSG00000090054 | SPTLC1   |
| 615 | 2  | ENSG00000068784 | SRBD1    |
| 616 | 17 | ENSG00000072310 | SREBF1   |
| 617 | 22 | ENSG00000198911 | SREBF2   |
| 618 | 7  | ENSG00000135250 | SRPK2    |
| 619 | 17 | ENSG00000167720 | SRR      |
| 620 | 10 | ENSG00000229256 | ST13P13  |
| 621 | 8  | ENSG00000008513 | ST3GAL1  |
| 622 | 3  | ENSG00000010327 | STAB1    |
| 623 | 12 | ENSG00000185482 | STAC3    |
| 624 | 3  | ENSG00000118007 | STAG1    |
| 625 | 12 | ENSG00000166888 | STAT6    |
| 626 | 4  | ENSG00000109689 | STIM2    |
| 627 | 11 | ENSG00000134910 | STT3A    |
| 628 | 19 | ENSG00000105705 | SUGP1    |
| 629 | 2  | ENSG00000138068 | SULT6B1  |
| 630 | 3  | ENSG00000157152 | SYN2     |
| 631 | 6  | ENSG00000131018 | SYNE1    |
| 632 | 12 | ENSG00000166863 | TAC3     |
| 633 | 10 | ENSG00000148835 | TAF5     |
| 634 | 16 | ENSG00000149930 | TAOK2    |
| 635 | 3  | ENSG00000131374 | TBC1D5   |
| 636 | 16 | ENSG00000149922 | TBX6     |
| 637 | 7  | ENSG00000059377 | TBXAS1   |
| 638 | 22 | ENSG00000100207 | TCF20    |
| 639 | 18 | ENSG00000196628 | TCF4     |

|     |    |                 |               |
|-----|----|-----------------|---------------|
| 640 | 3  | ENSG00000241438 | TDGF1P6       |
| 641 | 2  | ENSG00000163235 | TGFA          |
| 642 | 16 | ENSG00000168286 | THAP11        |
| 643 | 3  | ENSG00000163634 | THOC7         |
| 644 | 3  | ENSG00000240549 | THOC7-AS1     |
| 645 | 15 | ENSG00000104067 | TJP1          |
| 646 | 9  | ENSG00000196781 | TLE1          |
| 647 | 15 | ENSG00000140332 | TLE3          |
| 648 | 3  | ENSG00000239732 | TLR9          |
| 649 | 19 | ENSG00000213996 | TM6SF2        |
| 650 | 5  | ENSG00000113119 | TMCO6         |
| 651 | 3  | ENSG00000213533 | TMEM110       |
| 652 | 3  | ENSG00000248592 | MEM110-MUSTN1 |
| 653 | 12 | ENSG00000151952 | TMEM132D      |
| 654 | 12 | ENSG00000166881 | TMEM194A      |
| 655 | 3  | ENSG00000186329 | TMEM212       |
| 656 | 16 | ENSG00000149932 | TMEM219       |
| 657 | 12 | ENSG00000133687 | TMTC1         |
| 658 | 11 | ENSG00000213593 | TMX2          |
| 659 | 18 | ENSG00000141655 | TNFRSF11A     |
| 660 | 22 | ENSG00000159958 | TNFRSF13C     |
| 661 | 3  | ENSG00000154310 | TNIK          |
| 662 | 3  | ENSG00000114854 | TNNC1         |
| 663 | 17 | ENSG00000175662 | TOM1L2        |
| 664 | 14 | ENSG00000131323 | TRAF3         |
| 665 | 3  | ENSG00000168016 | TRANK1        |
| 666 | 6  | ENSG00000234127 | TRIM26        |
| 667 | 11 | ENSG00000166326 | TRIM44        |
| 668 | 10 | ENSG00000171206 | TRIM8         |
| 669 | 14 | ENSG00000166166 | TRMT61A       |
| 670 | 8  | ENSG00000171045 | TSNARE1       |
| 671 | 16 | ENSG00000102904 | TSNAXIP1      |
| 672 | 11 | ENSG00000157570 | TSPAN18       |
| 673 | 17 | ENSG00000167721 | TSR1          |
| 674 | 19 | ENSG00000178093 | TSSK6         |
| 675 | 5  | ENSG00000113638 | TTC33         |
| 676 | 9  | ENSG00000175764 | TTLL11        |
| 677 | 8  | ENSG00000104723 | TUSC3         |
| 678 | 3  | ENSG00000247596 | TWF2          |
| 679 | 2  | ENSG00000162971 | TYW5          |
| 680 | 15 | ENSG00000189136 | UBE2Q2P1      |
| 681 | 10 | ENSG00000173915 | USMG5         |
| 682 | 13 | ENSG00000152484 | USP12         |
| 683 | 1  | ENSG00000136631 | VPS45         |
| 684 | 2  | ENSG00000028116 | VRK2          |
| 685 | 11 | ENSG00000019102 | VSIG2         |
| 686 | 10 | ENSG00000166272 | WBP1L         |
| 687 | 22 | ENSG00000183066 | WBP2NL        |



|     |    |                 |         |
|-----|----|-----------------|---------|
| 688 | 4  | ENSG00000071127 | WDR1    |
| 689 | 5  | ENSG00000120314 | WDR55   |
| 690 | 15 | ENSG00000166415 | WDR72   |
| 691 | 3  | ENSG00000164091 | WDR82   |
| 692 | 8  | ENSG00000147548 | WHSC1L1 |
| 693 | 16 | ENSG00000186153 | WVOX    |
| 694 | 14 | ENSG00000126215 | XRCC3   |
| 695 | 19 | ENSG00000250067 | YJEFN3  |
| 696 | 16 | ENSG00000090238 | YPEL3   |
| 697 | 11 | ENSG00000166793 | YPEL4   |
| 698 | 3  | ENSG00000181722 | ZBTB20  |
| 699 | 2  | ENSG00000204186 | ZDBF2   |
| 700 | 11 | ENSG00000156599 | ZDHC5   |
| 701 | 2  | ENSG00000169554 | ZEB2    |
| 702 | 16 | ENSG00000184939 | ZFP90   |
| 703 | 8  | ENSG00000169946 | ZFPM2   |
| 704 | 14 | ENSG00000100711 | ZFYVE21 |
| 705 | 4  | ENSG00000159733 | ZFYVE28 |
| 706 | 6  | ENSG00000189298 | ZKSCAN3 |
| 707 | 6  | ENSG00000187626 | ZKSCAN4 |
| 708 | 5  | ENSG00000146007 | ZMAT2   |
| 709 | 10 | ENSG00000108175 | ZMIZ1   |
| 710 | 1  | ENSG00000196418 | ZNF124  |
| 711 | 6  | ENSG00000096654 | ZNF184  |
| 712 | 11 | ENSG00000166261 | ZNF202  |
| 713 | 11 | ENSG00000175213 | ZNF408  |
| 714 | 19 | ENSG00000198597 | ZNF536  |
| 715 | 8  | ENSG00000120963 | ZNF706  |
| 716 | 2  | ENSG00000170396 | ZNF804A |
| 717 | 20 | ENSG00000124203 | ZNF831  |
| 718 | 6  | ENSG00000158691 | ZSCAN12 |
| 719 | 15 | ENSG00000176371 | ZSCAN2  |
| 720 | 6  | ENSG00000187987 | ZSCAN23 |
| 721 | 6  | ENSG00000235109 | ZSCAN31 |
| 722 | 5  | ENSG00000130449 | ZSWIM6  |
| 723 | 17 | ENSG00000074755 | ZZEF1   |
