# Supplementary material for: THC exposure of human iPSC neurons impacts genes associated with neuropsychiatric disorders
Source: PubMed Central journal article supplement (PMC5915454; doi:10.1038/s41398-018-0137-3), 2018-04-25
Supplement: 41398_2018_137_MOESM9_ESM.pdf [file 41398_2018_137_MOESM9_ESM.pdf]

**Supplementary Table 8: Genes associated with mitochondrial and ion channel function altered in schizophrenia and in response to THC treatments**

| Gene class                 | Acute THC dose | Chronic THC doses | Schizophrenia |
|----------------------------|----------------|-------------------|---------------|
|                            |                |                   |               |
|                            |                |                   |               |
| <b>Mitochondrial genes</b> |                |                   |               |
|                            |                |                   |               |
| MT-ATP6                    | ✓              |                   |               |
| UQCRBP1                    | ✓              |                   |               |
| SDHA                       | ✓              |                   |               |
| DDIT4                      | ✓              |                   |               |
| DDX28                      |                | ✓                 |               |
| DNAJA3                     |                | ✓                 |               |
| HAX1                       |                | ✓                 |               |
| KIAA1683                   |                | ✓                 |               |
| TRIAP1                     |                | ✓                 |               |
| RARS                       |                | ✓                 |               |
| CS                         |                | ✓                 |               |
| CYB5R3                     |                | ✓                 |               |
| CYC1                       |                | ✓                 |               |
| DIABLO                     |                | ✓                 |               |
| GBF1                       |                | ✓                 |               |
| HADH                       |                | ✓                 |               |
| MRPL28                     |                | ✓                 |               |
| MRPS18B                    |                | ✓                 |               |
| PTRF                       |                | ✓                 |               |
| SDHB                       |                | ✓                 |               |
| UQCRC2                     |                | ✓                 |               |
| YRDC                       |                | ✓                 |               |
| MARS2                      |                | ✓                 |               |
| MAVS                       |                | ✓                 |               |
| SLC25A4                    |                | ✓                 |               |
| MRPL17                     |                | ✓                 |               |
| MT-ND4                     | ✓              | ✓                 |               |
| MT-CO1                     | ✓              | ✓                 |               |
| MT-CO2                     | ✓              | ✓                 |               |
| MT-CO3                     | ✓              | ✓                 |               |
| MT-ND4L                    | ✓              | ✓                 |               |
| ADPRHL2                    | ✓              | ✓                 |               |
| GRPEL1                     | ✓              | ✓                 |               |
| ALDH18A1                   | ✓              | ✓                 |               |
| COQ10B                     | ✓              | ✓                 |               |
| COX7A2                     | ✓              | ✓                 |               |
| DMPK                       | ✓              | ✓                 |               |
| HAGH                       | ✓              | ✓                 |               |

|                  |   |   |   |
|------------------|---|---|---|
| MTHFD2           | ✓ | ✓ |   |
| MGST1            | ✓ | ✓ |   |
| MTFP1            | ✓ | ✓ |   |
| MRPL14           | ✓ | ✓ |   |
| MRPL49           | ✓ | ✓ |   |
| MRPL54           | ✓ | ✓ |   |
| MRPS7            | ✓ | ✓ |   |
| PMAIP1           | ✓ | ✓ |   |
| PDK2             | ✓ | ✓ |   |
| RGS2             | ✓ | ✓ |   |
| RPS3             | ✓ | ✓ |   |
| SGK1             | ✓ | ✓ |   |
| SLC25A32         | ✓ | ✓ |   |
| TFB2M            | ✓ | ✓ |   |
| ME3              |   |   | ✓ |
|                  |   |   |   |
| <b>WNT genes</b> |   |   |   |
|                  |   |   |   |
| APC              | ✓ | ✓ |   |
| DDIT3            | ✓ | ✓ |   |
| HIC1             | ✓ | ✓ |   |
| BTRC             | ✓ | ✓ |   |
| DDB1             | ✓ | ✓ |   |
| DKK3             | ✓ | ✓ |   |
| SOX5             | ✓ | ✓ |   |
| SOX12            | ✓ | ✓ |   |
| UBC              | ✓ | ✓ |   |
| ZBED3            | ✓ |   |   |
| PTPRZ1           | ✓ |   |   |
| WNT16            |   | ✓ |   |
| FZD2             |   | ✓ |   |
| GSK3B            |   | ✓ |   |
| TNKS             |   | ✓ |   |
| CSNK2A2          |   | ✓ |   |
| BCL9             |   | ✓ |   |
| EP300            |   | ✓ |   |
| DKK1             |   | ✓ |   |
| FZD1             |   | ✓ |   |
| CDH10            |   | ✓ |   |
| TSC1             |   | ✓ |   |
| TCF4             |   |   | ✓ |
| ACVR1            |   |   | ✓ |
| DAB2             |   |   | ✓ |
| NOTUM            |   |   | ✓ |
| RSPO3            |   |   | ✓ |
| TRABD2B          |   |   | ✓ |

|                          |   |   |   |
|--------------------------|---|---|---|
| WIF1                     |   |   | ✓ |
| WNT10A                   |   |   | ✓ |
| WNT5A                    |   |   | ✓ |
| WNT6                     |   |   | ✓ |
| KREMEN1                  |   |   | ✓ |
| ROR1                     |   |   | ✓ |
| RNF43                    |   |   | ✓ |
| SOSTDC1                  |   |   | ✓ |
| TLE2                     |   |   | ✓ |
| WLS                      |   |   | ✓ |
|                          |   |   |   |
| <b>Ion channel genes</b> |   |   |   |
|                          |   |   |   |
| CACNG7                   | ✓ | ✓ |   |
| GRID2                    | ✓ | ✓ |   |
| GRIK1                    | ✓ | ✓ |   |
| ITPR2                    | ✓ | ✓ |   |
| LRRC8E                   | ✓ | ✓ |   |
| KCNN3                    | ✓ | ✓ |   |
| KCNK15                   | ✓ |   |   |
| KCNF1                    | ✓ |   |   |
| KCNA4                    | ✓ | ✓ |   |
| KCNE4                    | ✓ | ✓ |   |
| KCNJ10                   | ✓ | ✓ |   |
| RYR3                     | ✓ | ✓ |   |
| TRPV1                    | ✓ | ✓ |   |
| TMEM38A                  | ✓ |   |   |
| FXD6                     |   | ✓ |   |
| ASIC1                    |   | ✓ |   |
| CHRNA9                   |   | ✓ |   |
| KCNT2                    |   | ✓ |   |
| KCNK6                    |   | ✓ |   |
| KCNJ2                    |   | ✓ |   |
| KCNQ1                    |   | ✓ |   |
| TMEM63A                  |   | ✓ |   |
| ATP1A2                   |   |   | ✓ |
| BEST1                    |   |   | ✓ |
| CALHM2                   |   |   | ✓ |
| CACNA2D1                 |   |   | ✓ |
| CACNG6                   |   |   | ✓ |
| CACNA1G                  |   |   | ✓ |
| CLCA2                    |   |   | ✓ |
| CLIC2                    |   |   | ✓ |
| CHRNA1                   |   |   | ✓ |
| CLDN10                   |   |   | ✓ |
| GABRE                    |   |   | ✓ |

|        |  |  |   |
|--------|--|--|---|
| GABRQ  |  |  | ✓ |
| GRIK2  |  |  | ✓ |
| HFE    |  |  | ✓ |
| PKD1L3 |  |  | ✓ |
| KCNMB2 |  |  | ✓ |
| KCNU1  |  |  | ✓ |
| KCNA1  |  |  | ✓ |
| KCNA5  |  |  | ✓ |
| KCNA6  |  |  | ✓ |
| KCNAB1 |  |  | ✓ |
| KCNE3  |  |  | ✓ |
| KCNH2  |  |  | ✓ |
| P2RX7  |  |  | ✓ |
| SFXN3  |  |  | ✓ |
| SCN2B  |  |  | ✓ |
| TRPV4  |  |  | ✓ |
| TMC1   |  |  | ✓ |
| CNTN2  |  |  | ✓ |
