# Supplementary material for: THC exposure of human iPSC neurons impacts genes associated with neuropsychiatric disorders
Source: PubMed Central journal article supplement (PMC5915454; doi:10.1038/s41398-018-0137-3), 2018-04-25
Supplement: 41398_2018_137_MOESM10_ESM.pdf [file 41398_2018_137_MOESM10_ESM.pdf]

Supplementary Table 9: Significant gene expression changes in response to activation following THC treatments

Significantly altered genes following KCl activation between control and acute THC treated iPSC-derived neurons.

| Ensembl gene ID | logFC        | logCPM       | PValue     | FDR         | hgnc_symbol | Chromosome | start position | end position | strand |
|-----------------|--------------|--------------|------------|-------------|-------------|------------|----------------|--------------|--------|
| ENSG00000068028 | 1.266426053  | 4.322005324  | 7.18E-07   | 0.001873926 | RASSF1      | 3          | 50329782       | 50340980     | -1     |
| ENSG00000070495 | 1.230446853  | 5.051611894  | 1.13E-05   | 0.011656817 | JMJD6       | 17         | 76712832       | 76726799     | -1     |
| ENSG00000088451 | -1.576374496 | 3.397171643  | 5.39E-07   | 0.001664573 | TGDS        | 13         | 94574051       | 94596257     | -1     |
| ENSG00000100811 | 0.757612831  | 6.896510317  | 1.18E-05   | 0.011810869 | YY1         | 14         | 100238298      | 100282792    | 1      |
| ENSG00000106003 | -2.12007621  | 3.841000412  | 1.64E-05   | 0.014630961 | LFNG        | 7          | 2512529        | 2529177      | 1      |
| ENSG00000116954 | 1.265460559  | 5.545589586  | 3.53E-07   | 0.001437724 | RRAGC       | 1          | 38838198       | 38859823     | -1     |
| ENSG00000134294 | 2.034366779  | 9.658319329  | 3.30E-11   | 3.74E-07    | SLC38A2     | 12         | 46358189       | 46372867     | -1     |
| ENSG00000141040 | -1.552164988 | 4.437734035  | 7.88E-12   | 2.67E-07    | ZNF287      | 17         | 16551387       | 16569206     | -1     |
| ENSG00000144120 | -1.758453284 | 2.427672294  | 7.63E-06   | 0.009248032 | TMEM177     | 2          | 119679167      | 119686507    | 1      |
| ENSG00000147789 | -1.117755361 | 4.553614633  | 3.03E-06   | 0.004987117 | ZNF7        | 8          | 144827464      | 144847509    | 1      |
| ENSG00000149781 | 3.004857911  | 0.150597537  | 2.85E-05   | 0.023027734 | FERMT3      | 11         | 64206678       | 64223886     | 1      |
| ENSG00000150347 | 1.438509735  | 7.50990393   | 3.31E-06   | 0.005100382 | ARID5B      | 10         | 61901300       | 62096944     | 1      |
| ENSG00000150457 | 1.212985646  | 5.348942231  | 9.55E-05   | 0.04815705  | LATS2       | 13         | 20973032       | 21061547     | -1     |
| ENSG00000157184 | -0.962223513 | 4.651100643  | 6.57E-05   | 0.038958442 | CPT2        | 1          | 53196429       | 53214197     | 1      |
| ENSG00000159388 | -1.026180561 | 5.469524308  | 4.08E-05   | 0.029496713 | BTG2        | 1          | 203305491      | 203309602    | 1      |
| ENSG00000162396 | -1.900233985 | 2.656259236  | 1.14E-09   | 9.64E-06    | PARS2       | 1          | 54756898       | 54764514     | -1     |
| ENSG00000162757 | -2.43752931  | 2.801233188  | 2.51E-11   | 3.74E-07    | C1orf74     | 1          | 209779208      | 209784559    | -1     |
| ENSG00000163083 | -1.553537957 | 3.72905897   | 6.23E-07   | 0.001763353 | INHBB       | 2          | 120346143      | 120351808    | 1      |
| ENSG00000163914 | 5.640903863  | -1.073776942 | 4.20E-05   | 0.029719271 | RHO         | 3          | 129528640      | 129535169    | 1      |
| ENSG00000164296 | -1.592705174 | 3.727747895  | 1.62E-05   | 0.014630961 | TIGD6       | 5          | 149993118      | 150001167    | -1     |
| ENSG00000166189 | -1.480538777 | 4.00329844   | 2.72E-05   | 0.022491819 | HPS6        | 10         | 102065390      | 102068038    | 1      |
| ENSG00000166192 | -1.359259527 | 3.160098491  | 5.68E-05   | 0.037068748 | SENPA8      | 15         | 72114258       | 72143688     | 1      |
| ENSG00000166704 | -0.879883255 | 5.219931354  | 7.95E-05   | 0.043242095 | ZNF606      | 19         | 57977053       | 58003349     | -1     |
| ENSG00000168661 | -1.294105324 | 3.236495627  | 3.41E-05   | 0.026915717 | ZNF30       | 19         | 34926903       | 34945170     | 1      |
| NA              | -1.480538777 | 1.755300351  | 7.43E-05   | 0.042010884 | NA          | NA         | NA             | NA           | NA     |
| ENSG00000174796 | -1.15859168  | 3.944248976  | 3.06E-06   | 0.004987117 | THAP6       | 4          | 75513946       | 75550473     | 1      |
| ENSG00000177352 | -1.532586743 | 3.608950005  | 5.12E-06   | 0.006932223 | CCDC71      | 3          | 49162535       | 49166321     | -1     |
| ENSG00000179476 | -2.325720927 | 2.165270354  | 2.65E-09   | 1.80E-05    | C14orf28    | 14         | 44897295       | 44907257     | 1      |
| ENSG00000180938 | -1.801796309 | 1.548549666  | 9.65E-05   | 0.04815705  | ZNF572      | 8          | 124973298      | 124979389    | 1      |
| ENSG00000181264 | -1.004758796 | 4.285380715  | 4.36E-06   | 0.006172807 | TMEM136     | 11         | 120325129      | 120333682    | 1      |
| ENSG00000181450 | -1.376439312 | 5.305390636  | 1.28E-06   | 0.003114816 | ZNF678      | 1          | 227563543      | 227677443    | 1      |
| ENSG00000182308 | 2.562410292  | 0.819925282  | 6.31E-05   | 0.038801935 | DCAF4L1     | 4          | 41981696       | 41986467     | 1      |
| ENSG00000182405 | -1.190268448 | 2.909950107  | 1.71E-05   | 0.014904794 | PGBD4       | 15         | 34102073       | 34108684     | 1      |
| ENSG00000186496 | -1.566936115 | 3.706722947  | 3.09E-06   | 0.004987117 | ZNF396      | 18         | 35366697       | 35377337     | -1     |
| ENSG00000186812 | -0.694397626 | 5.808362009  | 7.97E-05   | 0.043242095 | ZNF397      | 18         | 35241030       | 35267133     | 1      |
| ENSG00000189431 | -1.355038535 | 2.600164441  | 1.07E-05   | 0.011328782 | RASSF10     | 11         | 13009577       | 13012106     | 1      |
| ENSG00000196214 | -1.016586309 | 4.728240733  | 1.94E-06   | 0.004169471 | ZNF766      | 19         | 52269571       | 52296046     | 1      |
| ENSG00000196659 | -1.369328733 | 4.921732905  | 9.22E-05   | 0.047909481 | TTC30B      | 2          | 177548998      | 177553014    | -1     |
| ENSG00000196981 | -1.266304027 | 4.146493362  | 8.82E-06   | 0.009982887 | WDR5B       | 3          | 122412332      | 122416051    | -1     |
| ENSG00000197128 | -0.948854099 | 5.791986663  | 2.01E-06   | 0.004169471 | ZNF772      | 19         | 57466663       | 57477570     | -1     |
| ENSG00000197841 | -0.936491552 | 5.446267753  | 3.68E-05   | 0.027534272 | ZNF181      | 19         | 34734155       | 34745378     | 1      |
| ENSG00000198346 | -1.186605448 | 3.76725239   | 4.24E-06   | 0.006172807 | ZNF813      | 19         | 53467735       | 53496255     | 1      |
| NA              | -3.498534833 | -0.835834304 | 6.72E-05   | 0.038958442 | NA          | NA         | NA             | NA           | NA     |
| ENSG00000215251 | 1.102659708  | 5.587243263  | 3.90E-07   | 0.001437724 | FASTKD5     | 20         | 3146519        | 3159897      | -1     |
| NA              | 2.153336411  | 1.115519842  | 9.01E-05   | 0.047781819 | NA          | NA         | NA             | NA           | NA     |
| ENSG00000224420 | 2.674794961  | 0.948013737  | 6.71E-06   | 0.008441816 | ADM5        | 19         | 49688664       | 49690575     | 1      |
| NA              | -1.560061702 | 2.045581534  | 1.07E-05   | 0.011328782 | NA          | NA         | NA             | NA           | NA     |
| NA              | 4.146609849  | -0.005254581 | 9.32E-05   | 0.047909481 | NA          | NA         | NA             | NA           | NA     |
| NA              | 2.080276507  | 0.785088558  | 5.53E-05   | 0.036833325 | NA          | NA         | NA             | NA           | NA     |
| NA              | -1.203414387 | 3.226204354  | 8.74E-06   | 0.009982887 | NA          | NA         | NA             | NA           | NA     |
| NA              | 1.531060786  | 1.680984283  | 3.52E-05   | 0.027135813 | NA          | NA         | NA             | NA           | NA     |
| NA              | 0.861210647  | 4.942773702  | 6.77E-05   | 0.038958442 | NA          | NA         | NA             | NA           | NA     |
| ENSG00000249459 | 1.417063374  | 4.07377362   | 6.40E-05   | 0.038801935 | ZNF286B     | 17         | 18658429       | 18682262     | -1     |
| NA              | 2.860703038  | 0.356330783  | 5.31E-06   | 0.006932223 | NA          | NA         | NA             | NA           | NA     |
| NA              | 2.275357849  | 1.257899129  | 2.09E-06   | 0.004169471 | NA          | NA         | NA             | NA           | NA     |
| ENSG00000257390 | 3.902738233  | 1.154331377  | 4.24E-07   | 0.001437724 | NA          | 12         | 55757275       | 55827546     | -1     |
| NA              | -1.608641144 | 2.241042932  | 1.87E-05   | 0.015853134 | NA          | NA         | NA             | NA           | NA     |
| ENSG00000259529 | 1.68698259   | 1.884396689  | 5.86E-05   | 0.037533347 | NA          | 14         | 24151218       | 24167402     | 1      |
| NA              | -3.009662018 | 0.382394403  | 2.80E-06   | 0.004987117 | NA          | NA         | NA             | NA           | NA     |
| NA              | 5.520636182  | -1.075279098 | 8.03E-05   | 0.043242095 | NA          | NA         | NA             | NA           | NA     |
| NA              | 2.272069958  | 1.854028231  | 3.73E-05   | 0.027534272 | NA          | NA         | NA             | NA           | NA     |
| NA              | 5.453055704  | -0.747707641 | 4.98E-05   | 0.033794518 | NA          | NA         | NA             | NA           | NA     |
| ENSG00000269343 | -0.977121098 | 4.102909917  | 0.00010103 | 0.049701322 | ZNF587B     | 19         | 57819741       | 57846238     | 1      |
| NA              | -1.647086966 | 2.118481669  | 6.36E-05   | 0.038801935 | NA          | NA         | NA             | NA           | NA     |
| NA              | 3.079141642  | -0.389027524 | 4.58E-05   | 0.031722328 | NA          | NA         | NA             | NA           | NA     |
| ENSG00000274349 | -1.778687103 | 3.51361967   | 3.69E-07   | 0.001437724 | ZNF658      | 9          | 66856426       | 66932141     | 1      |
| NA              | -2.257863472 | 1.545505763  | 1.30E-05   | 0.01256374  | NA          | NA         | NA             | NA           | NA     |
| NA              | -5.108090507 | 0.053578598  | 1.61E-05   | 0.014630961 | NA          | NA         | NA             | NA           | NA     |
| NA              | 2.819370644  | 0.93238859   | 7.96E-08   | 0.000450478 | NA          | NA         | NA             | NA           | NA     |

Significantly altered genes following KCl activation between control and chronic THC treated iPSC-derived neurons.

| Ensembl gene ID | logFC        | logCPM       | PValue     | FDR         | hgnc_symbol | chromosome | start position | end position | strand |
|-----------------|--------------|--------------|------------|-------------|-------------|------------|----------------|--------------|--------|
| ENSG00000068028 | 1.233191871  | 4.322005324  | 7.32E-07   | 0.001427753 | RASSF1      | 3          | 50329782       | 50340980     | -1     |
| ENSG00000070495 | 1.256630991  | 5.051611894  | 5.73E-06   | 0.00486508  | JMJD6       | 17         | 76712832       | 76726799     | -1     |
| ENSG00000088451 | -1.265888954 | 3.397171643  | 3.10E-05   | 0.01668535  | TGDS        | 13         | 94574051       | 94596257     | -1     |
| ENSG00000099622 | -1.107934899 | 7.95099751   | 4.77E-06   | 0.004379423 | CIRBP       | 19         | 1259384        | 1274880      | 1      |
| ENSG00000100811 | 0.811682913  | 6.896510317  | 2.42E-06   | 0.002930465 | YY1         | 14         | 100238298      | 100282792    | 1      |
| ENSG00000105219 | 2.881007799  | -0.943194879 | 0.00013782 | 0.045811488 | CNTD2       | 19         | 40222208       | 40226690     | -1     |
| ENSG00000105732 | 1.004168123  | 3.879608457  | 0.00013988 | 0.045811488 | ZNF574      | 19         | 42068477       | 42081565     | 1      |
| ENSG00000106003 | -1.946928906 | 3.841000412  | 6.28E-05   | 0.027642777 | LFNG        | 7          | 2512529        | 2529177      | 1      |
| ENSG00000109047 | 6.142956283  | -0.654030716 | 8.68E-08   | 0.000368128 | RCVRN       | 17         | 9896320        | 9905621      | -1     |
| ENSG00000109667 | 3.675544231  | 0.152030552  | 6.35E-05   | 0.027642777 | SLC2A9      | 4          | 9771153        | 10054936     | -1     |
| ENSG00000116017 | 1.680868402  | 2.015887044  | 4.02E-05   | 0.02038494  | ARID3A      | 19         | 925781         | 975934       | 1      |
| ENSG00000116560 | 0.650014894  | 8.432821734  | 0.0001036  | 0.037889282 | SFPQ        | 1          | 35176378       | 35193148     | -1     |
| ENSG00000116954 | 1.248453143  | 5.545589586  | 3.75E-07   | 0.000981898 | RRAGC       | 1          | 38838198       | 38859823     | -1     |
| ENSG00000119737 | 1.577849445  | 0.897779254  | 7.91E-05   | 0.031959156 | GPR75       | 2          | 53852913       | 53859989     | -1     |
| ENSG00000120709 | 1.097147537  | 7.327946334  | 8.03E-06   | 0.006193004 | FAM53C      | 5          | 138331935      | 138349729    | 1      |
| ENSG00000129749 | 1.93250197   | 0.731706661  | 2.88E-05   | 0.016013445 | CHRNA10     | 11         | 3665587        | 3671384      | -1     |
| ENSG00000131732 | -0.897761176 | 4.653012968  | 8.56E-05   | 0.033717001 | ZCCHC9      | 5          | 81301590       | 81313297     | 1      |
| ENSG00000134294 | 1.973344418  | 9.658319329  | 1.12E-10   | 1.26E-06    | SLC38A2     | 12         | 46358189       | 46372867     | -1     |
| ENSG00000135482 | -1.120921593 | 4.25924289   | 1.38E-06   | 0.001983576 | ZC3H10      | 12         | 56118159       | 56127514     | 1      |
| ENSG00000136891 | 0.70945548   | 5.575513398  | 0.00010381 | 0.037889282 | TEX10       | 9          | 100302077      | 100352939    | -1     |
| ENSG00000137875 | 5.618840533  | -1.224012181 | 0.00012025 | 0.042994791 | BCL2L10     | 15         | 52109263       | 52112775     | -1     |
| ENSG00000141040 | -1.537006495 | 4.437734035  | 8.63E-12   | 1.47E-07    | ZNF287      | 17         | 16551387       | 16569206     | -1     |
| ENSG00000143622 | 0.683337869  | 6.733252396  | 0.00013925 | 0.045811488 | RIT1        | 1          | 155897808      | 155911404    | -1     |
| ENSG00000144120 | -2.085145968 | 2.427672294  | 1.79E-07   | 0.000608693 | TMEM177     | 2          | 119679167      | 119686507    | 1      |
| ENSG00000147789 | -0.994123902 | 4.553614633  | 2.25E-05   | 0.01318374  | ZNF7        | 8          | 144827464      | 144847509    | 1      |
| ENSG00000149781 | 2.461687034  | 0.150597537  | 1.36E-05   | 0.008540197 | FERMT3      | 11         | 64206678       | 64223886     | 1      |
| ENSG00000150347 | 1.209833339  | 7.50990393   | 8.24E-05   | 0.032910677 | ARID5B      | 10         | 61901300       | 62096944     | 1      |
| ENSG00000155868 | -0.923296016 | 4.401139836  | 4.26E-05   | 0.020641149 | MED7        | 5          | 157137412      | 157159019    | -1     |
| ENSG00000157184 | -0.922840289 | 4.651100643  | 0.00010249 | 0.037889282 | CPT2        | 1          | 53196429       | 53214197     | 1      |
| ENSG00000159388 | -1.091852161 | 5.469524308  | 1.09E-05   | 0.00746772  | BTG2        | 1          | 203305491      | 203309602    | 1      |
| ENSG00000162396 | -2.188288315 | 2.656259236  | 6.86E-13   | 2.33E-08    | PARS2       | 1          | 54756898       | 54764514     | -1     |
| ENSG00000162757 | -2.134407598 | 2.801233188  | 6.08E-10   | 5.16E-06    | C1orf74     | 1          | 209779208      | 209784559    | -1     |
| ENSG00000163083 | -1.246252477 | 3.72905897   | 5.12E-05   | 0.023163819 | INHBB       | 2          | 120346143      | 120351808    | 1      |
| ENSG00000164011 | -1.923073058 | 2.679557967  | 2.76E-07   | 0.000852263 | ZNF691      | 1          | 42846573       | 42852477     | 1      |
| ENSG00000164296 | -1.719276004 | 3.727747895  | 3.23E-06   | 0.003554035 | TIGD6       | 5          | 149993118      | 150001167    | -1     |
| ENSG00000165355 | 1.080071082  | 5.556371951  | 4.21E-05   | 0.020641149 | FBXO33      | 14         | 39397669       | 39432500     | -1     |
| ENSG00000166189 | -1.247716575 | 4.00329844   | 1.22E-05   | 0.00795593  | HPS6        | 10         | 102065390      | 102068038    | 1      |
| ENSG00000166192 | -1.458183764 | 3.160098491  | 9.51E-06   | 0.007176869 | SENP8       | 15         | 72114258       | 72143688     | 1      |
| ENSG00000166704 | -0.882998939 | 5.219931354  | 6.52E-05   | 0.028002141 | ZNF606      | 19         | 57977053       | 58003349     | -1     |
| ENSG00000170681 | 1.630238067  | 2.002359279  | 2.27E-06   | 0.002848623 | MURC        | 9          | 100578079      | 100587906    | 1      |
| ENSG00000171806 | -1.214253642 | 3.274128686  | 3.09E-05   | 0.01668535  | METTL18     | 1          | 169792529      | 169794966    | -1     |
| ENSG00000174010 | 0.871655034  | 5.73399767   | 4.37E-05   | 0.020907447 | KLHL15      | X          | 23983720       | 24027186     | -1     |
| ENSG00000175536 | -2.329066825 | 0.394678881  | 7.15E-05   | 0.029963722 | LIP2        | 11         | 74491712       | 74493733     | -1     |
| NA              | -3.419284612 | -0.547044513 | 3.73E-05   | 0.0194688   | NA          | NA         | NA             | NA           | NA     |
| ENSG00000177352 | -1.349620606 | 3.608950005  | 4.58E-05   | 0.021128314 | CCDC71      | 3          | 49162535       | 49166321     | -1     |
| ENSG00000177426 | -1.069779106 | 6.758011402  | 4.61E-05   | 0.021128314 | TGIF1       | 18         | 3411608        | 3459978      | 1      |
| ENSG00000179476 | -1.891497172 | 2.165270354  | 3.78E-07   | 0.000981898 | C14orf28    | 14         | 44897295       | 44907257     | 1      |
| NA              | 5.521943496  | -1.140473034 | 1.12E-05   | 0.00746772  | NA          | NA         | NA             | NA           | NA     |
| ENSG00000180938 | -2.582143039 | 1.548549666  | 2.42E-08   | 0.000117271 | ZNF572      | 8          | 124973298      | 124979389    | 1      |
| ENSG00000181264 | -1.231594467 | 4.285380715  | 1.32E-08   | 7.48E-05    | TMEM136     | 11         | 120325129      | 120333682    | 1      |
| ENSG00000181450 | -1.405194564 | 5.305390636  | 7.11E-07   | 0.001427753 | ZNF678      | 1          | 227563543      | 227677443    | 1      |
| ENSG00000182308 | 2.340284662  | 0.819925282  | 7.56E-05   | 0.031074963 | DCAF4L1     | 4          | 41981696       | 41986467     | 1      |
| ENSG00000183340 | -0.948002859 | 4.144970474  | 0.00012033 | 0.042994791 | JRKL        | 11         | 96389989       | 96507574     | 1      |
| ENSG00000186496 | -1.45913099  | 3.706722947  | 9.81E-06   | 0.007193606 | ZNF396      | 18         | 35366697       | 35377337     | -1     |
| ENSG00000186812 | -0.730036647 | 5.808362009  | 2.74E-05   | 0.015522337 | ZNF397      | 18         | 35241030       | 35267133     | 1      |
| ENSG00000189431 | -1.336389578 | 2.600164441  | 3.95E-06   | 0.003940279 | RASSF10     | 11         | 13009577       | 13012106     | 1      |
| ENSG00000196214 | -0.908628493 | 4.728240733  | 1.41E-05   | 0.008562781 | ZNF766      | 19         | 52269571       | 52296046     | 1      |
| ENSG00000196345 | -1.957399605 | 1.099854716  | 3.39E-06   | 0.003601105 | ZKSCAN7     | 3          | 44555193       | 44594173     | 1      |
| ENSG00000196981 | -1.240803901 | 4.146493362  | 1.04E-05   | 0.007379498 | WDR5B       | 3          | 122412332      | 122416051    | -1     |
| ENSG00000197128 | -0.994264977 | 5.791986663  | 5.46E-07   | 0.001236262 | ZNF772      | 19         | 57466663       | 57477570     | -1     |
| ENSG00000197566 | -1.097172553 | 4.374550624  | 3.25E-06   | 0.003554035 | ZNF624      | 17         | 16620737       | 16653856     | -1     |
| ENSG00000197841 | -0.978158009 | 5.446267753  | 1.38E-05   | 0.008540197 | ZNF181      | 19         | 34734155       | 34745378     | 1      |
| ENSG00000198346 | -0.99121364  | 3.76725239   | 7.60E-05   | 0.031074963 | ZNF813      | 19         | 53467735       | 53496255     | 1      |
| ENSG00000204323 | -2.190718559 | 1.489180655  | 8.64E-05   | 0.033717001 | SMIM5       | 17         | 75633434       | 75641404     | 1      |
| NA              | -1.746589756 | 1.074133235  | 0.00014036 | 0.045811488 | NA          | NA         | NA             | NA           | NA     |
| NA              | 3.888598693  | -1.084158077 | 0.00013428 | 0.045811488 | NA          | NA         | NA             | NA           | NA     |
| ENSG00000212521 | 1.126739343  | 5.587243263  | 1.68E-07   | 0.000608693 | FASTKD5     | 20         | 3146519        | 3159897      | -1     |
| ENSG00000224420 | 2.601483353  | 0.948013737  | 2.67E-06   | 0.003130105 | ADM5        | 19         | 49688664       | 49690575     | 1      |
| NA              | 3.908810116  | -0.616880823 | 4.53E-05   | 0.021128314 | NA          | NA         | NA             | NA           | NA     |
| NA              | 4.433945352  | -0.005254581 | 1.12E-05   | 0.00746772  | NA          | NA         | NA             | NA           | NA     |
| NA              | 6.720008116  | -1.29643623  | 0.00013937 | 0.045811488 | NA          | NA         | NA             | NA           | NA     |
| NA              | 1.5813908    | 1.680984283  | 4.99E-06   | 0.004454039 | NA          | NA         | NA             | NA           | NA     |
| NA              | 3.259217729  | -0.562554461 | 4.00E-05   | 0.02038494  | NA          | NA         | NA             | NA           | NA     |
| NA              | 3.30935082   | -0.326125752 | 4.65E-06   | 0.004379423 | NA          | NA         | NA             | NA           | NA     |

|                 |              |              |            |             |         |    |          |          |    |
|-----------------|--------------|--------------|------------|-------------|---------|----|----------|----------|----|
| NA              | 5.078829063  | -1.583122351 | 0.00013536 | 0.045811488 | NA      | NA | NA       | NA       | NA |
| NA              | 1.054792995  | 4.942773702  | 1.07E-06   | 0.001647578 | NA      | NA | NA       | NA       | NA |
| NA              | -3.670303609 | 0.45057878   | 2.52E-09   | 1.71E-05    | NA      | NA | NA       | NA       | NA |
| NA              | 3.601890705  | -0.360076642 | 9.66E-05   | 0.036862482 | NA      | NA | NA       | NA       | NA |
| ENSG00000249459 | 1.589887706  | 4.07377362   | 6.58E-06   | 0.005443729 | ZNF286B | 17 | 18658429 | 18682262 | -1 |
| NA              | 1.859348082  | 1.494482802  | 6.98E-05   | 0.029604562 | NA      | NA | NA       | NA       | NA |
| NA              | 3.258550009  | 0.356330783  | 8.17E-07   | 0.001449725 | NA      | NA | NA       | NA       | NA |
| NA              | 2.21061305   | 1.257899129  | 1.99E-06   | 0.002596331 | NA      | NA | NA       | NA       | NA |
| NA              | -1.609938645 | 2.047055402  | 7.93E-06   | 0.006193004 | NA      | NA | NA       | NA       | NA |
| NA              | -1.640405392 | 0.992703299  | 0.00014737 | 0.047641186 | NA      | NA | NA       | NA       | NA |
| NA              | 2.882610655  | 1.484702978  | 1.76E-05   | 0.010506036 | NA      | NA | NA       | NA       | NA |
| NA              | -2.727751338 | 0.010954644  | 4.15E-06   | 0.00402448  | NA      | NA | NA       | NA       | NA |
| NA              | -3.600788877 | -0.628777628 | 5.16E-06   | 0.004493852 | NA      | NA | NA       | NA       | NA |
| ENSG00000262304 | 5.893222834  | -0.225332348 | 3.32E-05   | 0.017587044 |         | 17 | 3585149  | 3636249  | -1 |
| NA              | -0.97137291  | 4.375290641  | 7.37E-06   | 0.005958451 | NA      | NA | NA       | NA       | NA |
| NA              | 4.451405858  | 0.759247704  | 3.68E-06   | 0.003780332 | NA      | NA | NA       | NA       | NA |
| NA              | 1.251601765  | 2.983671966  | 2.34E-05   | 0.013458816 | NA      | NA | NA       | NA       | NA |
| NA              | 5.136760213  | -1.003392582 | 0.00012824 | 0.044878657 | NA      | NA | NA       | NA       | NA |
| ENSG00000267699 | -5.881488518 | -0.247828384 | 1.05E-06   | 0.001647578 |         | 18 | 50968019 | 51058144 | 1  |
| NA              | -2.938273036 | -0.264675156 | 4.11E-05   | 0.020524585 | NA      | NA | NA       | NA       | NA |
| NA              | 2.360238105  | -0.198656453 | 0.00010115 | 0.037889282 | NA      | NA | NA       | NA       | NA |
| NA              | -2.018358781 | 0.549883903  | 1.35E-05   | 0.008540197 | NA      | NA | NA       | NA       | NA |
| NA              | -2.080223747 | 0.967983606  | 9.96E-06   | 0.007193606 | NA      | NA | NA       | NA       | NA |
| NA              | -1.942635203 | 1.615046619  | 1.87E-06   | 0.002538161 | NA      | NA | NA       | NA       | NA |
| NA              | 1.913258379  | 0.989924238  | 0.00012552 | 0.044381551 | NA      | NA | NA       | NA       | NA |
| NA              | 2.290854091  | 1.108251271  | 4.05E-07   | 0.000981898 | NA      | NA | NA       | NA       | NA |
| NA              | -3.060702337 | -0.280926945 | 6.20E-05   | 0.027642777 | NA      | NA | NA       | NA       | NA |
| ENSG00000274349 | -1.674030304 | 3.51361967   | 8.54E-07   | 0.001449725 | ZNF658  | 9  | 66856426 | 66932141 | 1  |
| NA              | -2.512856109 | 1.545505763  | 7.57E-07   | 0.001427753 | NA      | NA | NA       | NA       | NA |
| NA              | -3.507893738 | -0.383015779 | 1.40E-06   | 0.001983576 | NA      | NA | NA       | NA       | NA |
| NA              | 3.850828439  | -1.154214383 | 8.89E-05   | 0.034281652 | NA      | NA | NA       | NA       | NA |
