# Supplementary material for: THC exposure of human iPSC neurons impacts genes associated with neuropsychiatric disorders
Source: PubMed Central journal article supplement (PMC5915454; doi:10.1038/s41398-018-0137-3), 2018-04-25
Supplement: 41398_2018_137_MOESM11_ESM.pdf [file 41398_2018_137_MOESM11_ESM.pdf]

**Supplementary Table 10: Pearson correlations show high consistency between our control and activated dataset (Batches 1 and 3) with that of Roussos et al (Batch 2).**

|                     | GM04506_KCl_Batch2 | GM04506_Ctrl_Batch2 | GM09319_KCl_Batch2 | GM09319_Ctrl_Batch2 | GM09429_KCl_Batch2 | GM09429_Ctrl_Batch2 |
|---------------------|--------------------|---------------------|--------------------|---------------------|--------------------|---------------------|
| GM03651_Ctrl_Batch1 | 0.972              | 0.9772              | 0.9719             | 0.9776              | 0.9714             | 0.9717              |
| GM03651_KCl_Batch1  | 0.9807             | 0.9749              | 0.9786             | 0.9761              | 0.9744             | 0.9724              |
| GM03440_Ctrl_Batch3 | 0.9747             | 0.9746              | 0.9709             | 0.9734              | 0.9648             | 0.9681              |
| GM3440_KCl_Batch3   | 0.9809             | 0.9741              | 0.978              | 0.9738              | 0.9717             | 0.9684              |
